# Supplementary material for: Cancer genomes tolerate deleterious coding mutations through somatic copy number amplifications of wild-type regions
Source: Springer Nature journal article supplement (doi:10.1038/s41467-023-39313-8), 2023-06-16
Supplement: MOESM1 [file 41467_2023_39313_MOESM1_ESM.pdf]

## Supplementary Information for

### Cancer genomes tolerate deleterious coding mutations through somatic copy number amplifications of wild-type regions

Fabio Alfieri<sup>1</sup>, Giulio Caravagna<sup>2</sup>, Martin H. Schaefer<sup>1,\*</sup>

\* Corresponding author

[martin.schaefer@ieo.it](mailto:martin.schaefer@ieo.it) (M.S.)

The PDF file includes:

- Supplementary Dataset legends (1 to 4)
- Supplementary Figures (1 to 9)

# Supplementary Dataset legends

## Supplementary Dataset 1

$\mu$  score and amplification frequency for each tumor type at 1Mbp, 36Mbp and arm-level.

## Supplementary Dataset 2

Aggregation estimates computed with TANGO. The “Aggregation” column represents the raw scores computed by TANGO; the FoldChange column is computed using mutant aggregation score over the wild-type aggregation score.

## Supplementary Dataset 3

Pancancer protected and unprotected genes. Gene Ontology results of pancancer protected and unprotected gene sets, multiple testing correction performed.  $P_i$  stands for protection index. CRISPR common essential and non-essential genes.

## Supplementary Dataset 4

Number of genes and mutations in each subset of Fig. 2.

## Supplementary Figures

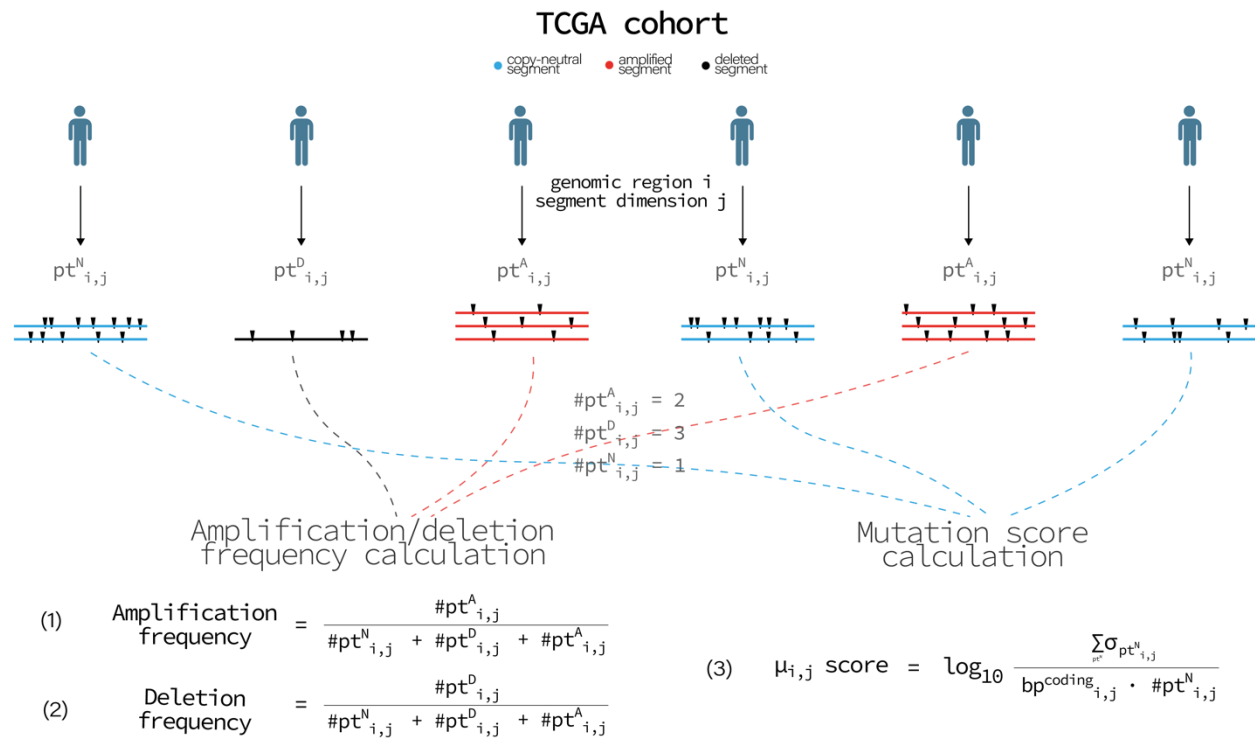**Figure S1**

A cartoon illustration of the method used for calculating the mutation score (the  $\mu_{i,j}$  score) and the amplification/deletion frequencies. After the classification of segments ( $i$ ) with a specific length ( $j$ ) for each patient ( $pt_{i,j}$ ) in copy-neutral ( $pt^N_{i,j}$ ), amplified ( $pt^A_{i,j}$ ) or deleted ( $pt^D_{i,j}$ ) based on their copy number, the amplification frequency is calculated as the number of patients with an amplified segment ( $\#pt^A_{i,j}$ ) over the total number of patients ( $\#pt^N_{i,j} + \#pt^A_{i,j} + \#pt^D_{i,j}$ ) within the analyzed TCGA cohort (1) and (2). The  $\mu$  score (3) is calculated by summing mutations only within the copy-neutral segments ( $\sigma_{pt^N_{i,j}}$ ) and thus normalizing for the number of copy-neutral patients ( $pt^N_{i,j}$ ) and the number of protein-coding nucleotides within the segment  $i$  ( $bp^{coding}_{i,j}$ ). Human being representations were adapted from “Icon Pack - Human Icons” by BioRender.com, retrieved from <https://app.biorender.com/biorender-templates/>.

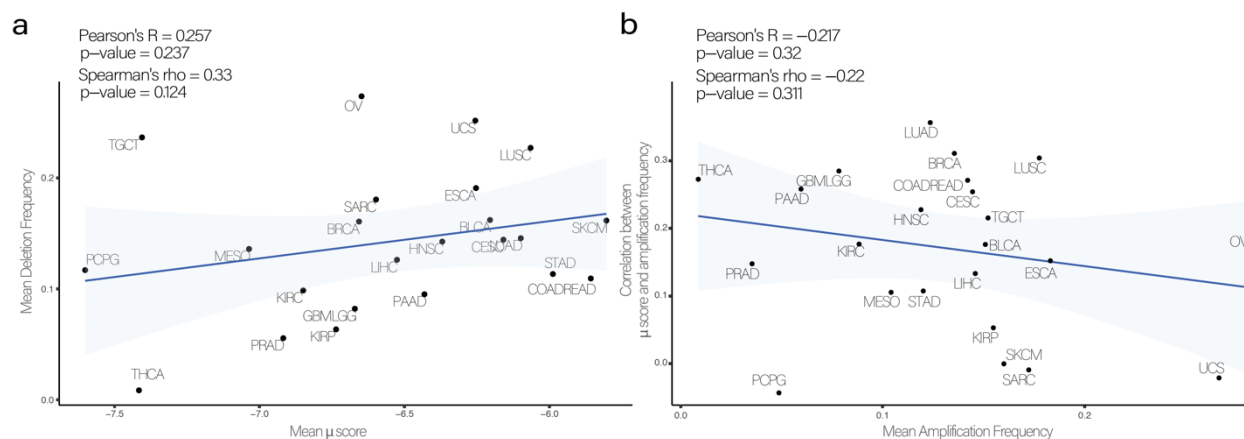**Figure S2**

The error bands reflect the 95% confidence intervals of these estimates.

**a:** Correlation between mean mutation ( $\mu$ ) score and mean deletion frequency calculated using Spearman's test.

**b:** Correlation between mean amplification frequency and Spearman's correlations (between  $\mu$  score and amplification frequencies) calculated using Spearman's test.

Lung Squamous cell Carcinoma (LUSC); Lung Adenocarcinoma (LUAD); Colon Adenocarcinoma and Rectum Adenocarcinoma (COADREAD); Cervical Squamous cell Carcinoma and Endocervical Carcinoma (CESC); Breast invasive Carcinoma (BRCA); Skin Cutaneous Melanoma (SKCM); Ovarian Serous Cystadenocarcinoma (OV); Uterine Carcinosarcoma (UCS); Liver Hepatocellular Carcinoma (LIHC); Head and Neck Squamous Carcinoma (HNSC); Prostate Adenocarcinoma (PRAD); Thyroid carcinoma (THCA); Pheochromocytoma and Paranglioma (PCPG); Esophageal carcinoma (ESCA); Stomach adenocarcinoma (STAD); Glioblastoma multiforme, Brain Lower Grade Glioma (GBMLGG); Kidney renal clear cell carcinoma (KIRC); Kidney renal papillary cell carcinoma (KIPF); Pancreatic adenocarcinoma (PAAD); Testicular Germ Cell Tumors (TGCT); Mesothelioma, (MESO); Sarcoma (SARC); Bladder Urothelial Carcinoma (BLCA). Source data are provided as a Source Data file.

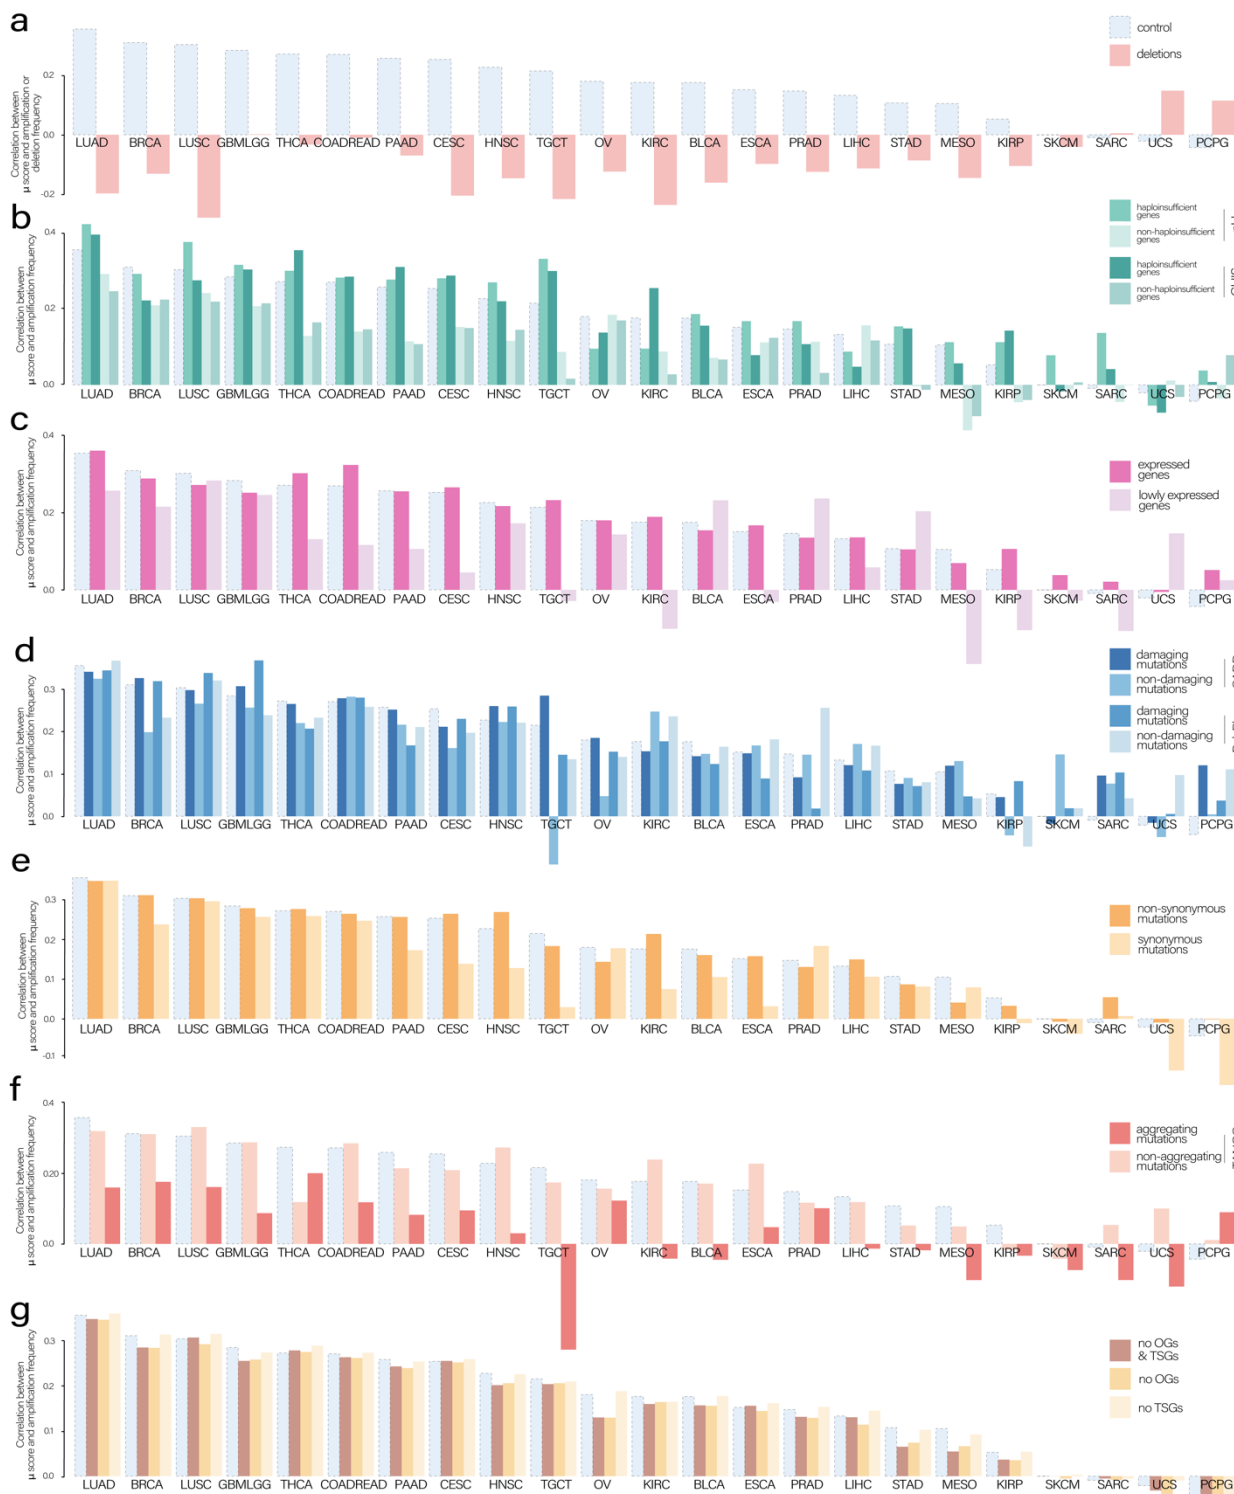

**Figure S3**

Extension of **Fig. 2** across all TCGA tumor types.

- a:** Correlations between the mutation ( $\mu$ ) score and amplification or deletion frequency across all TCGA tumor types.
- b:** Correlations between amplification frequency and  $\mu$  score calculated using mutations within haploinsufficient and non-haploinsufficient genes.
- c:** Correlations between amplification frequency and  $\mu$  score calculated using synonymous and non-synonymous mutations.
- d:** Correlations between amplification frequency and  $\mu$  score calculated using aggregation-causing and non-aggregation-causing mutations.
- e:** Correlations between amplification frequency and  $\mu$  score calculated using mutations within expressed and non-expressed genes.

**f:** Correlations between amplification frequency and  $\mu$  score calculated using damaging and non-damaging mutations (predicted by CADD or Polyphen) mutations.

**g:** Correlations between amplification frequency and  $\mu$  score calculated using mutations without OGs and TSGs, only without OGs or only without TSGs.

Lung Squamous cell Carcinoma (LUSC); Lung Adenocarcinoma (LUAD); Colon Adenocarcinoma and Rectum Adenocarcinoma (COADREAD); Cervical Squamous cell Carcinoma and Endocervical Carcinoma (CESC); Breast invasive Carcinoma (BRCA); Skin Cutaneous Melanoma (SKCM); Ovarian Serous Cystadenocarcinoma (OV); Uterine Carcinosarcoma (UCS); Liver Hepatocellular Carcinoma (LIHC); Head and Neck Squamous Carcinoma (HNSC); Prostate Adenocarcinoma (PRAD); Thyroid carcinoma (THCA); Pheochromocytoma and Paraganglioma (PCPG); Esophageal carcinoma (ESCA); Stomach adenocarcinoma (STAD); Glioblastoma multiforme, Brain Lower Grade Glioma (GBMLGG); Kidney renal clear cell carcinoma (KIRC); Kidney renal papillary cell carcinoma (KIRC); Pancreatic adenocarcinoma (PAAD); Testicular Germ Cell Tumors (TGCT); Mesothelioma, (MESO); Sarcoma (SARC); Bladder Urothelial Carcinoma (BLCA). Source data are provided as a Source Data file.

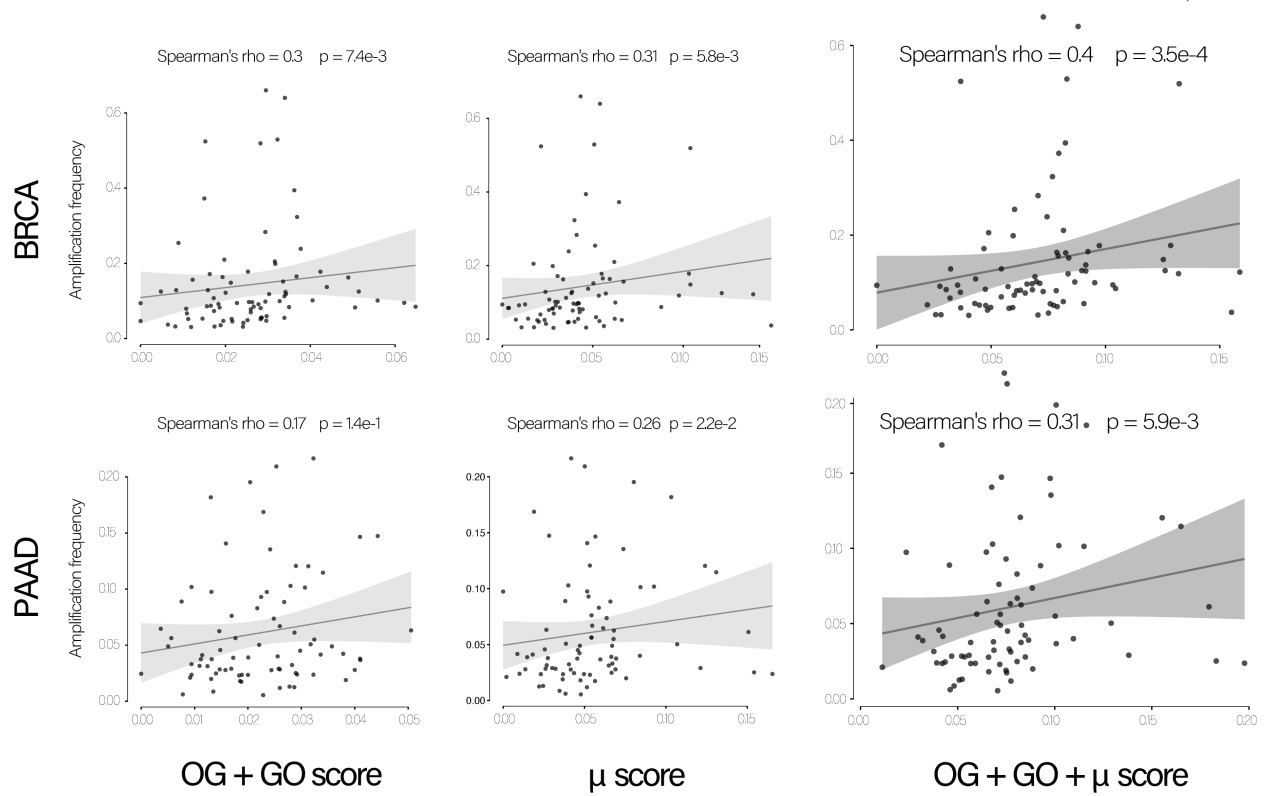

**Figure S4**

Correlations in Breast invasive Carcinoma (BRCA) and Pancreatic adenocarcinoma (PAAD) between amplification frequency and different predictors (figure refers to **Fig. 3**, controls are excluded) calculated using Spearman's test. The error bands reflect the 95% confidence intervals of these correlation estimates. Source data are provided as a Source Data file.

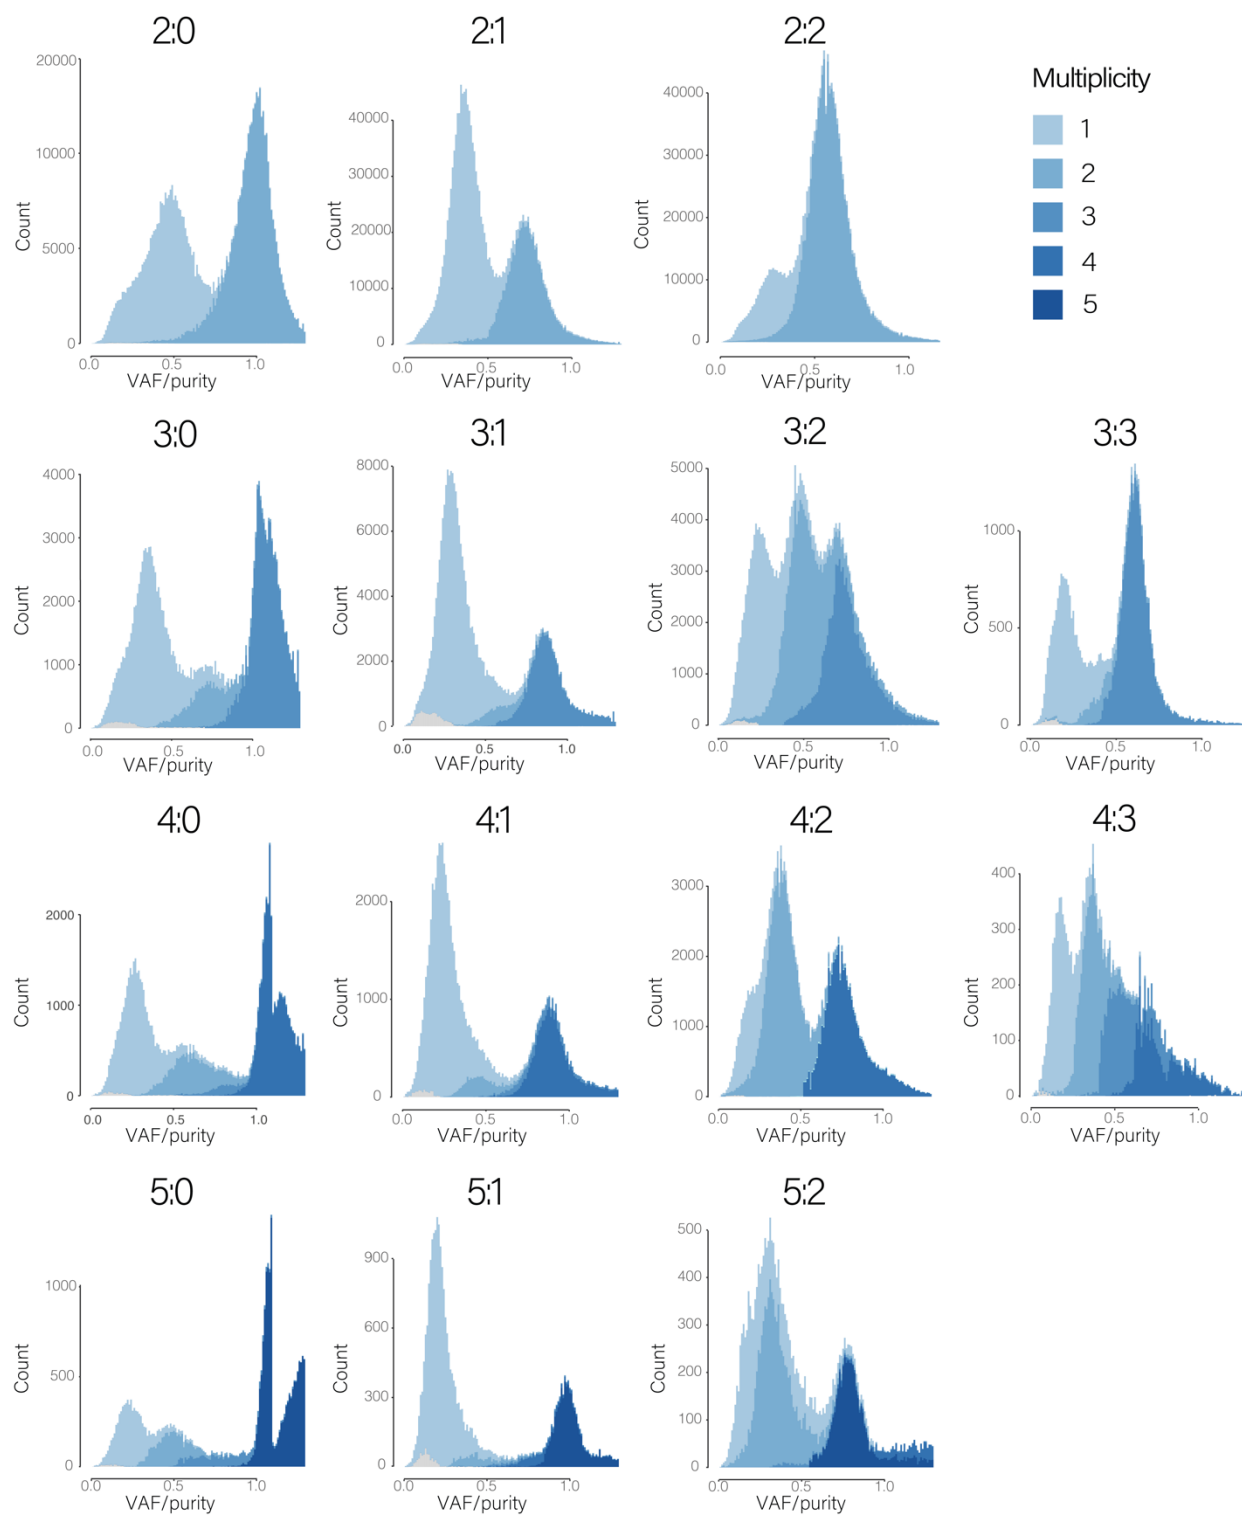

**Figure S5**

Histogram curves represent the different distribution of mutations according to VAF/purity, they are colored according to the predicted multiplicity. Above each histogram, X:Y represent the segment copy-number where X represents the major allele and Y represents the minor allele.

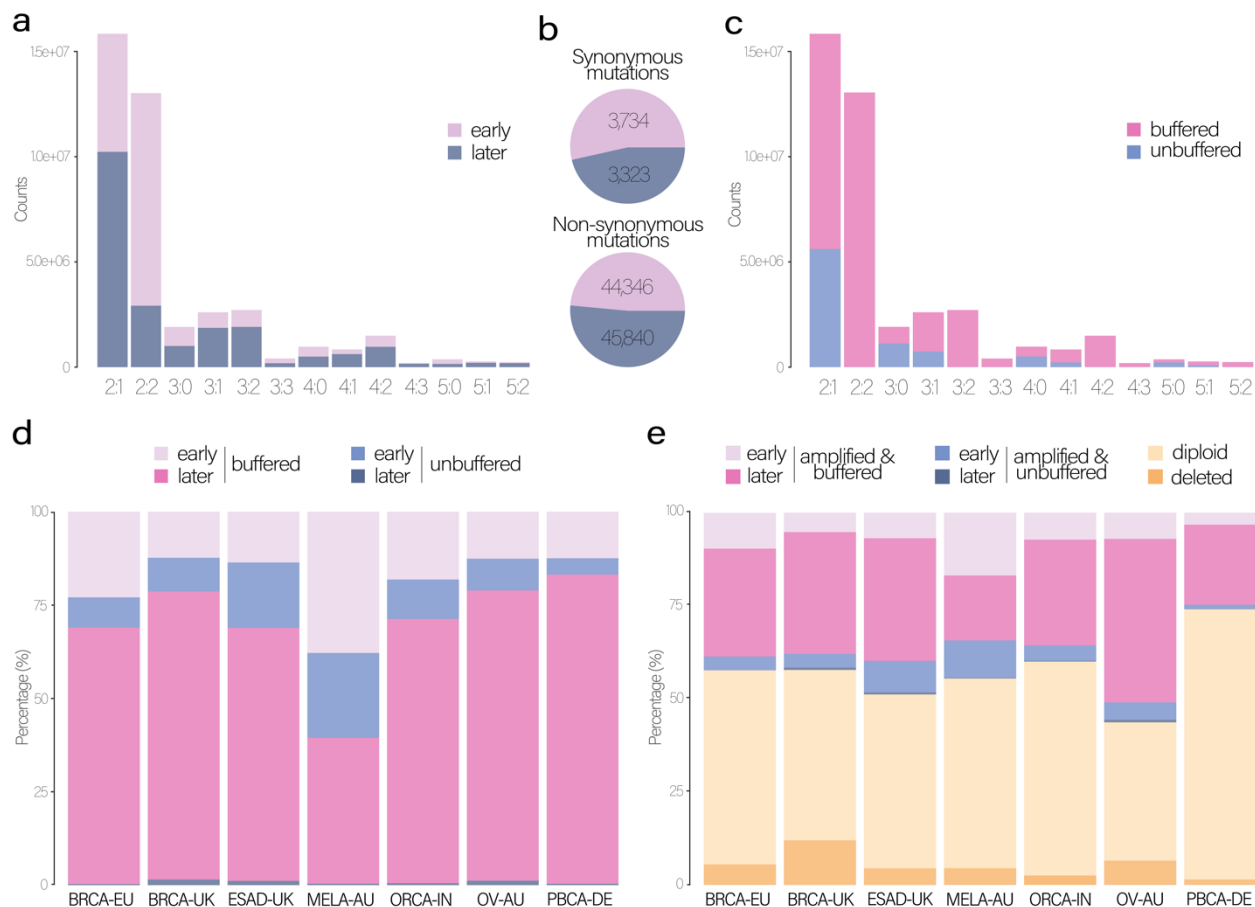**Figure S6**

**a:** Mutations within amplifications are classified as early or late and shown across segment's allele-specific copy number.

**b:** Synonymous and non-synonymous coding mutations in the early or late classification.

**c:** Mutations within amplifications are classified as buffered or unbuffered and shown across segment's allele-specific copy-number.

**d:** Mutations within amplifications are classified as early or late and as buffered or unbuffered, simultaneously.

**e:** All mutations (deleted, diploid and amplified) are classified as early or late and buffered or unbuffered.

Breast cancer European Union (BRCA-EU), Breast cancer - United Kingdom (BRCA-UK), Esophageal Adenocarcinoma - United Kingdom (ESAD-UK), Skin cancer - Australia (MELA-AU), Oral cancer - India (ORCA-IN), Ovarian cancer – Australia (OV-AU), Pediatric Brain cancer – Germany (PBCA-DE). Source data are provided as a Source Data file.

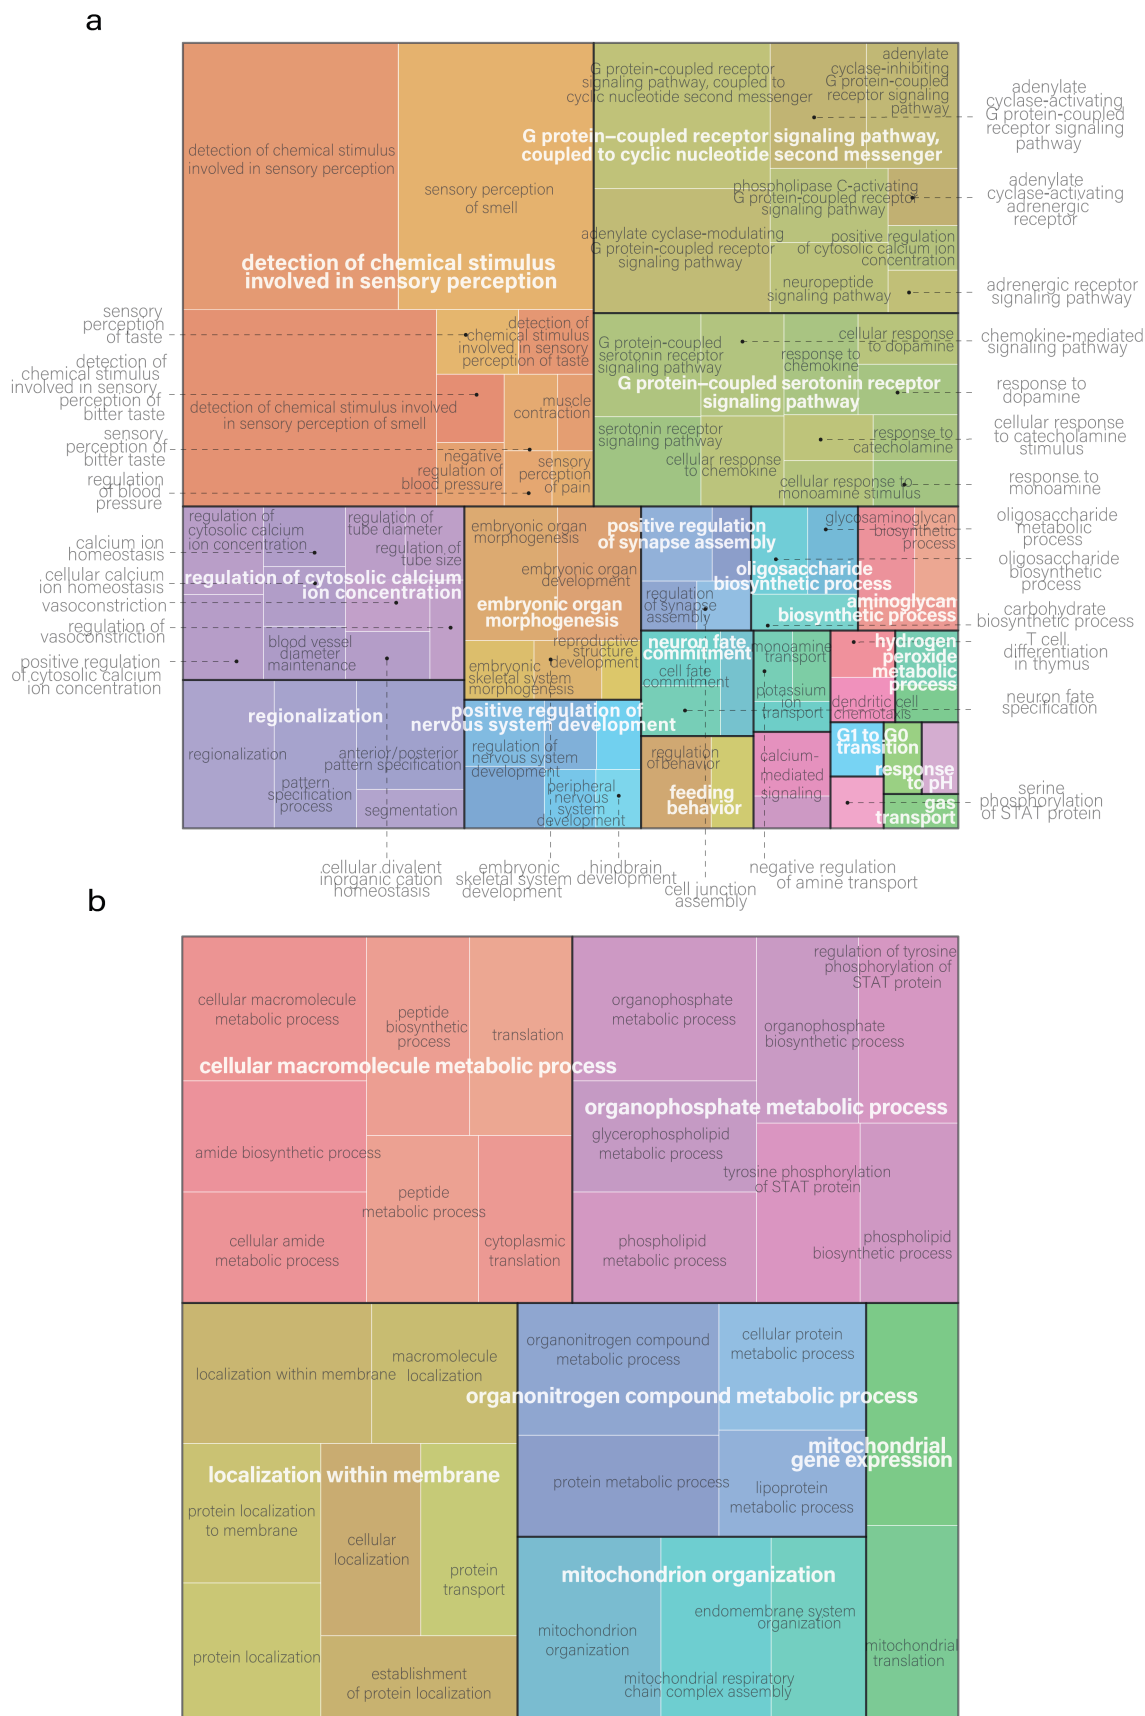

**Figure S7**

The full representation of **Fig 5a-b**.

**a:** gene ontology enrichments of unprotected gene functions (ReViGO).

**b:** Gene ontology enrichments of protected gene functions (ReViGO).

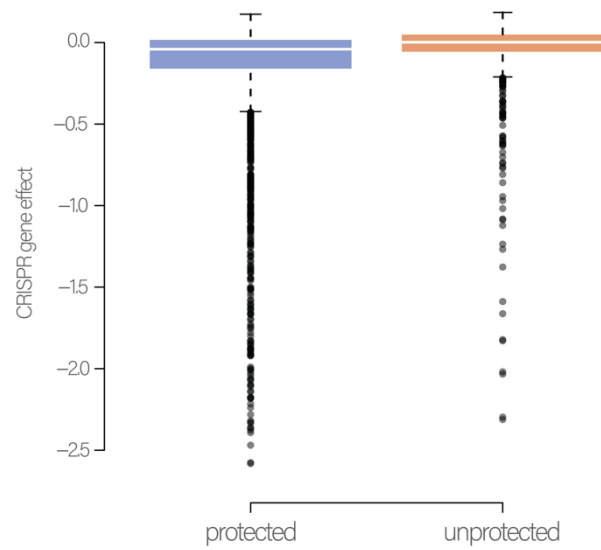**Figure S8**

CRISPR gene effect for protected and unprotected genes (protected:  $n = 633$ , unprotected:  $n = 1205$ ; boxplot without outliers in **Fig. 5c**). The box represents the 1<sup>st</sup> to 3<sup>rd</sup> quartile with the median marked by a horizontal line. Source data are provided as a Source Data file.

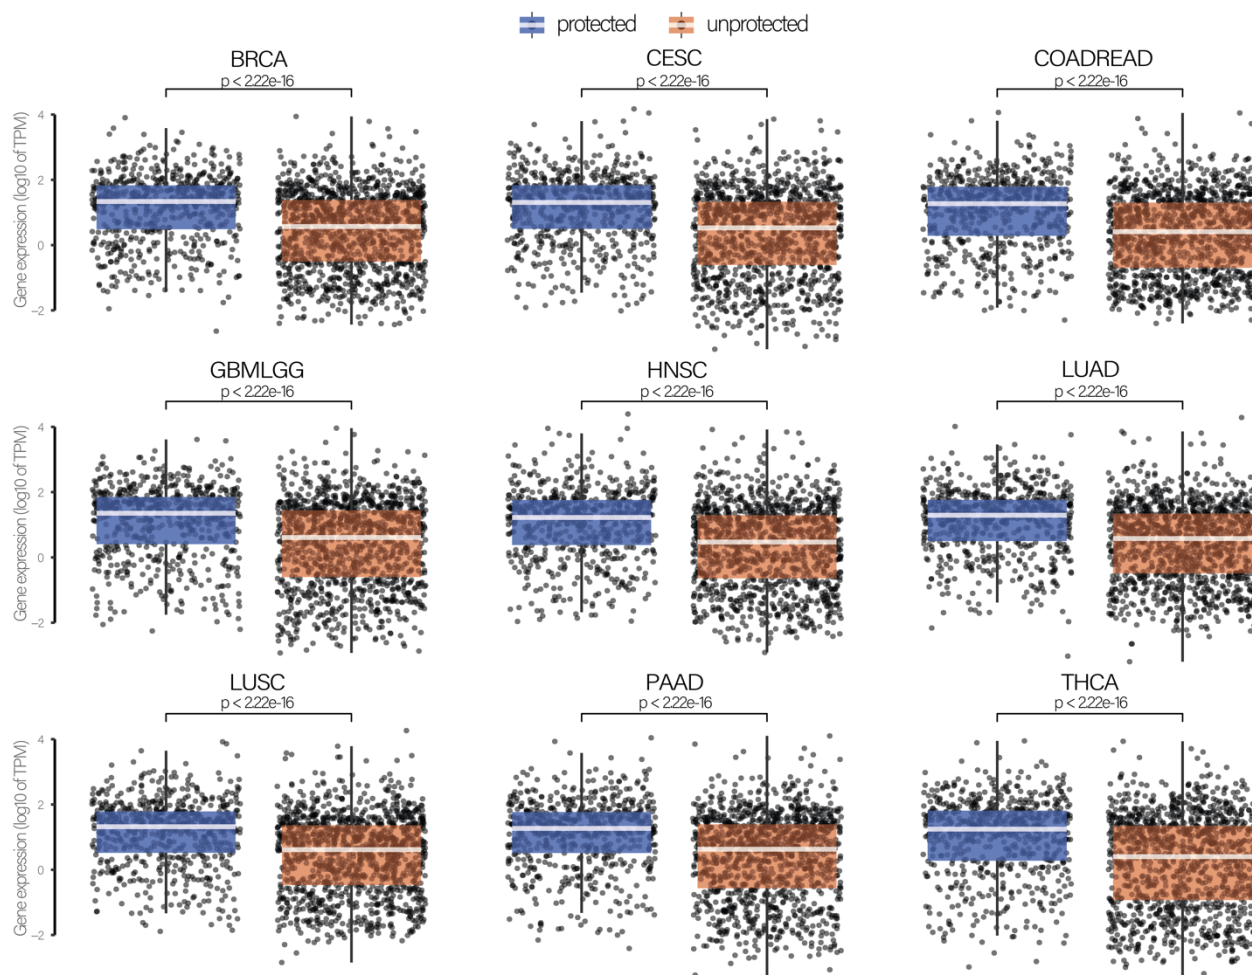

**Figure S9**

Mean expression of genes within the protected and unprotected gene sets across different cancer types. P-values were determined by a two-sided Wilcoxon test (protected:  $n = 633$ , unprotected:  $n = 1205$ ). The box represents the 1<sup>st</sup> to 3<sup>rd</sup> quartile with the median marked by a horizontal line. Lung Adenocarcinoma (LUAD); Breast invasive Carcinoma (BRCA); Lung Squamous cell Carcinoma (LUSC); Glioblastoma multiforme, Brain Lower Grade Glioma (GBMLGG); Thyroid carcinoma (THCA); Colon Adenocarcinoma and Rectum Adenocarcinoma (COADREAD); Pancreatic adenocarcinoma (PAAD); Cervical Squamous cell Carcinoma and Endocervical Carcinoma (CESC); Head and Neck Squamous Carcinoma (HNSC).
