# Supplementary material for: Cancer genomes tolerate deleterious coding mutations through somatic copy number amplifications of wild-type regions
Source: Springer Nature journal article supplement (doi:10.1038/s41467-023-39313-8), 2023-06-16
Supplement: MOESM3 [file 41467_2023_39313_MOESM3_ESM.pdf]

## **Description of Additional Supplementary Files**

**Supplementary Dataset 1:**  $\mu$  score and amplification frequency for each tumor type at 1 and 36 Mbp and arm-level.

**Supplementary Dataset 2:** aggregation estimates computed with TANGO.

**Supplementary Dataset 3:** protected and unprotected genes, gene ontology analysis and CRISPR common essential and non-essential.

**Supplementary Dataset 4:** number of genes and mutations in each subset of Fig. 2.
