# Supplementary material for: Cancer genomes tolerate deleterious coding mutations through somatic copy number amplifications of wild-type regions
Source: Nat Commun. 2023 Jun 16;14:3594. doi: 10.1038/s41467-023-39313-8 (PMC10276008; doi:10.1038/s41467-023-39313-8)
Supplement: Supplementary file 4 — Supplementary Dataset 1 [file 41467_2023_39313_MOESM4_ESM.xlsx]

## Sheet: 1Mbp
#genes	chromosome	start	end	coding length	% coding	LUSC.cna_freq_ampl	LUSC.mutations_norm	LUAD.cna_freq_ampl	LUAD.mutations_norm	BRCA.cna_freq_ampl	BRCA.mutations_norm	CESC.cna_freq_ampl	CESC.mutations_norm	THCA.cna_freq_ampl	THCA.mutations_norm	HNSC.cna_freq_ampl	HNSC.mutations_norm	PAAD.cna_freq_ampl	PAAD.mutations_norm	COADREAD.cna_freq_ampl	COADREAD.mutations_norm	OV.cna_freq_ampl	OV.mutations_norm	GBMLGG.cna_freq_ampl	GBMLGG.mutations_norm	BLCA.cna_freq_ampl	BLCA.mutations_norm	PCPG.cna_freq_ampl	PCPG.mutations_norm	PRAD.cna_freq_ampl	PRAD.mutations_norm	KIRC.cna_freq_ampl	KIRC.mutations_norm	MESO.cna_freq_ampl	MESO.mutations_norm	TGCT.cna_freq_ampl	TGCT.mutations_norm	KIRP.cna_freq_ampl	KIRP.mutations_norm	SARC.cna_freq_ampl	SARC.mutations_norm	LIHC.cna_freq_ampl	LIHC.mutations_norm	ESCA.cna_freq_ampl	ESCA.mutations_norm	STAD.cna_freq_ampl	STAD.mutations_norm	UCS.cna_freq_ampl	UCS.mutations_norm
12	1	3003019	5005030	785746	0.392478166964034	0.0607966457023061	2.04393e+07	0.108055009823183	3.30762e+06	0.0316265060240963	5.24598e+06	0.184981684981685	3.13943e+07	0.00208768267223382	3.33993e+06	0.0493951612903226	1.59622e+07	0.0340909090909091	3.31018e+07	0.0167597765363128	7.1088e+07	0.302325581395348	1.06319e+07	0.0480997624703088	9.64859e+06	0.107940446650124	2.61646e+07	0.0157232704402516	0	0.0115303983228511	9.08484e+06	0.00276243093922652	4.8735e+06	0.038961038961039	4.5918e+06	0.0868055555555556	1.42856e+06	0.00359712230215827	1.05273e+07	0.188841201716738	6.81813e+06	0.0535211267605634	2.29729e+06	0.106936416184971	2.9639e+07	0.0735632183908046	5.08286e+06	0.196428571428571	7.75856e+06
22	1	5005031	7007042	784919	0.392065082526978	0.0576519916142558	3.38995e+07	0.102161100196463	3.31945e+07	0.0311244979919678	2.32688e+07	0.184981684981685	5.31096e+07	0.00208768267223382	4.48457e+06	0.0483870967741935	2.40963e+07	0.03125	3.27376e+07	0.0139664804469273	7.9962e+07	0.310077519379845	6.15345e+06	0.0463182897862233	1.45351e+06	0.109181141439206	3.19503e+07	0.0157232704402516	1.14845e+06	0.00733752620545074	1.26565e+07	0	7.88188e+06	0.025974025974026	3.02996e+06	0.0833333333333333	665460	0.00359712230215827	1.80266e+07	0.201716738197425	1.43925e+07	0.052112676056338	2.37527e+07	0.104046242774566	3.46701e+07	0.0781609195402299	7.66396e+07	0.196428571428571	2.28871e+07
11	1	7007043	9009054	1272706	0.63571347224692	0.050314465408805	1.65632e+07	0.100196463654224	1.80173e+07	0.0266064257028112	7.5125e+06	0.17948717948718	3.2504e+07	0.00208768267223382	1.32865e+06	0.0473790322580645	8.83327e+06	0.0284090909090909	1.12671e+07	0.0148975791433892	4.07591e+07	0.301033591731266	1.27417e+07	0.0427553444180522	1.06448e+06	0.107940446650124	2.64865e+07	0.0125786163522013	871690	0.00733752620545074	5.26849e+06	0	2.17937e+06	0.0194805194805195	1.12074e+06	0.0763888888888889	1.80327e+06	0.00179856115107914	9.40093e+06	0.21244635193133	784365	0.0563380281690141	7.73212e+06	0.092485549132948	1.84002e+07	0.0770114942528735	4.05447e+07	0.142857142857143	1.6901e+07
22	1	9009055	11011066	887670	0.44338895071558	0.0450733752620545	4.37319e+07	0.0962671905697446	3.85614e+07	0.0230923694779116	1.56009e+07	0.173992673992674	6.35366e+07	0.00208768267223382	3.91337e+06	0.0413306451612904	2.69124e+07	0.03125	3.59044e+07	0.0148975791433892	1.06822e+08	0.295865633074935	2.08184e+07	0.0463182897862233	1.65393e+07	0.10545905707196	5.39698e+07	0.0188679245283019	2.36393e+06	0.00314465408805032	1.30698e+07	0	1.0946e+07	0.0324675324675325	7.8464e+06	0.0763888888888889	2.23175e+06	0.00359712230215827	1.6549e+07	0.216738197424893	1.30806e+07	0.0535211267605634	2.17968e+07	0.0838150289017341	2.89935e+07	0.0816091954022989	9.32257e+07	0.1875	3.53415e+07
39	1	11011067	13013078	960816	0.479925195253575	0.0440251572327044	7.32613e+07	0.0933202357563851	9.97776e+07	0.0200803212851405	2.6238e+07	0.173992673992674	8.21056e+07	0.00208768267223382	3.61807e+06	0.0403225806451613	4.83208e+07	0.0284090909090909	5.01227e+06	0.0148975791433892	1.60157e+08	0.277777777777777	3.42077e+07	0.0528503562945368	3.31034e+07	0.10545905707196	8.97487e+07	0.0188679245283019	0	0.00209643605870021	1.82057e+07	0.00138121546961326	3.14538e+07	0.0454545454545455	7.82082e+06	0.0763888888888889	2.37167e+06	0.00359712230215827	3.14403e+07	0.23175965665236	2.4438e+07	0.0563380281690141	3.81559e+06	0.0838150289017341	6.51166e+06	0.0735632183908046	1.28988e+07	0.178571428571429	3.8926e+07
9	1	13013079	15015090	277652	0.13868648139971201	0.0440251572327044	3.23527e+07	0.0893909626719057	5.16772e+07	0.0160642570281124	1.5558e+07	0.175824175824176	3.25608e+07	0.00208768267223382	110026	0.0403225806451613	2.19845e+07	0.0255681818181818	2.3978e+06	0.0130353817504655	1.32184e+08	0.264857881136951	1.30102e+07	0.0570071258907364	1.1666e+07	0.101736972704715	5.2543e+07	0.0157232704402516	896834	0.00419287211740042	5.41852e+06	0	8.09591e+06	0.038961038961039	0	0.0659722222222222	0	0.00179856115107914	1.68277e+06	0.233905579399142	993584	0.0549295774647887	5.03229e+07	0.0780346820809248	6.17595e+07	0.064367816091954	1.26123e+08	0.178571428571429	8.46491e+06
28	1	15015091	17017102	1010813	0.504898572036532	0.0419287211740042	6.25667e+07	0.0913555992141453	4.79455e+07	0.0205823293172691	2.7931e+07	0.173992673992674	1.25197e+08	0.00208768267223382	4.84859e+06	0.0372983870967742	4.27232e+07	0.0227272727272727	3.52844e+07	0.0111731843575419	1.31389e+08	0.246770025839793	2.95196e+07	0.0581947743467933	2.62079e+07	0.0942928039702234	8.98329e+07	0.0125786163522013	9.72993e+06	0.00524109014675053	1.71969e+07	0	1.55229e+07	0.038961038961039	7.58935e+06	0.0590277777777778	7.44474e+06	0.00359712230215827	3.13046e+07	0.23175965665236	2.77262e+07	0.0549295774647887	3.449e+06	0.0895953757225433	3.84836e+06	0.0666666666666667	1.08412e+08	0.160714285714286	4.12728e+07
15	1	17017103	19019114	776539	0.387879293430809	0.0377358490566038	5.23288e+07	0.0884086444007859	5.01262e+07	0.019578313253012	1.32188e+07	0.168498168498169	4.42935e+07	0.00208768267223382	3.75342e+06	0.0342741935483871	2.33731e+07	0.0198863636363636	2.17084e+07	0.00931098696461825	1.06865e+08	0.193798449612403	2.84721e+07	0.0546318289786223	2.02334e+07	0.0893300248138958	4.57215e+07	0.0125786163522013	1.7736e+06	0.00209643605870021	1.15623e+06	0	1.09726e+07	0.038961038961039	9.77676e+06	0.0555555555555556	2.05864e+06	0.00179856115107914	1.8764e+07	0.225321888412018	1.40888e+07	0.0535211267605634	2.35886e+07	0.0780346820809248	3.09797e+07	0.0586206896551724	6.57303e+07	0.151785714285714	3.06402e+07
29	1	19019115	21021126	737790	0.368524264589823	0.0324947589098532	6.36981e+07	0.0874263261296661	6.56057e+07	0.0215863453815261	2.39693e+07	0.172161172161172	8.6958e+07	0.00208768267223382	4.10002e+06	0.0352822580645162	2.81026e+07	0.0142045454545454	3.34625e+07	0.0074487895716946	1.55152e+08	0.174418604651163	3.12324e+07	0.0510688836104513	2.58172e+07	0.0955334987593052	5.57519e+07	0.0125786163522013	4.67217e+06	0.00628930817610063	117889	0	1.90209e+06	0.038961038961039	1.02575e+06	0.0555555555555556	874323	0.00179856115107914	2.41494e+06	0.227467811158798	2.34619e+07	0.0450704225352113	3.10891e+07	0.0578034682080925	3.28096e+07	0.0574712643678161	1.07166e+08	0.151785714285714	3.62715e+07
21	1	21021127	23023138	781233	0.39022393472167	0.0335429769392033	5.53824e+07	0.0893909626719057	7.0592e+07	0.0215863453815261	1.984e+07	0.168498168498169	8.32125e+07	0.00208768267223382	5.68824e+06	0.0322580645161291	3.7255e+07	0.0113636363636364	3.87726e+07	0.0074487895716946	1.29145e+08	0.171834625322998	2.75202e+07	0.0534441805225653	2.9068e+07	0.0893300248138958	7.24992e+07	0.0125786163522013	5.91737e+06	0.00733752620545074	1.36192e+07	0	1.63655e+07	0.038961038961039	7.7038e+06	0.0555555555555556	5.50914e+06	0	1.87438e+07	0.227467811158798	2.73241e+07	0.0394366197183099	3.03837e+07	0.0549132947976878	4.04799e+07	0.0425287356321839	1.05533e+08	0.142857142857143	3.47759e+07
26	1	23023139	25025150	751422	0.375333414584928	0.0356394129979036	5.46231e+07	0.0864440078585462	5.30155e+07	0.0210843373493976	2.26762e+07	0.168498168498169	7.4536e+07	0.00208768267223382	4.08517e+06	0.0262096774193548	2.97186e+07	0.0113636363636364	2.86857e+07	0.0074487895716946	1.24377e+08	0.175710594315245	2.69756e+07	0.0498812351543943	3.36147e+07	0.086848635235732	7.4356e+07	0.0125786163522013	4.28581e+06	0.00524109014675053	1.59489e+07	0.00138121546961326	1.72051e+07	0.0454545454545455	1.04792e+07	0.0625	5.09857e+06	0	2.34858e+07	0.229613733905579	1.81015e+07	0.0352112676056338	2.57271e+06	0.0664739884393064	3.91689e+07	0.0402298850574712	9.17375e+07	0.196428571428572	7.22301e+07
31	1	25025151	27027162	754272	0.376756982475629	0.0293501048218029	4.50706e+07	0.0834970530451866	4.00675e+06	0.0210843373493976	2.12764e+07	0.168498168498169	6.15434e+07	0.00208768267223382	2.20273e+06	0.0262096774193548	3.38571e+07	0.00852272727272729	3.48099e+07	0.0074487895716946	1.27336e+08	0.160206718346253	1.36705e+07	0.0534441805225653	2.42019e+06	0.0657568238213399	5.43162e+07	0.0125786163522013	0	0.00628930817610063	1.118e+07	0.00138121546961326	1.60297e+07	0.051948051948052	2.22947e+07	0.0659722222222222	3.4148e+06	0	1.9967e+06	0.223175965665236	1.64243e+07	0.030985915492957702	1.79618e+07	0.0491329479768786	2.91119e+07	0.0264367816091954	7.82629e+07	0.151785714285714	3.89605e+07
39	1	27027163	29029174	813799	0.406490570486091	0.0366876310272537	5.41094e+07	0.0844793713163065	5.78173e+07	0.0251004016064257	3.17057e+07	0.172161172161172	1.03398e+07	0.00208768267223382	5.75049e+06	0.0282258064516129	4.98297e+07	0.00284090909090909	4.2471e+07	0.0074487895716946	1.57126e+07	0.18733850129199	2.48309e+07	0.0576009501187648	3.00487e+06	0.0607940446650124	1.25711e+08	0.0157232704402516	2.34808e+06	0.00314465408805032	1.2089e+07	0.00276243093922652	1.98895e+07	0.051948051948052	1.49244e+07	0.0625	7.36718e+06	0	3.68938e+07	0.214592274678112	1.56258e+07	0.0295774647887324	4.64714e+07	0.0578034682080925	6.3702e+07	0.0264367816091954	1.6297e+08	0.169642857142857	5.59879e+07
17	1	29029175	32032192	755674	0.377457277978353	0.0345911949685535	3.36976e+07	0.0923379174852652	2.58651e+07	0.0431726907630522	1.21487e+07	0.17948717948718	4.68531e+07	0.00208768267223382	1.66491e+06	0.0352822580645162	2.04349e+06	0.00284090909090909	2.00801e+07	0.0130353817504655	7.58337e+07	0.235142118863049	1.58535e+07	0.0570071258907364	1.25005e+07	0.0632754342431762	3.56219e+07	0.0188679245283019	0	0.00628930817610065	5.73397e+06	0.00138121546961326	1.09053e+07	0.0844155844155844	7.09874e+06	0.0625	2.25285e+06	0.00359712230215827	1.70414e+07	0.210300429184549	1.51886e+07	0.0352112676056338	1.00589e+07	0.0722543352601156	2.17885e+07	0.0298850574712644	5.50618e+07	0.169642857142857	2.11856e+07
38	1	32032193	34034204	772302	0.385762922499965	0.0440251572327044	6.79705e+07	0.0972495088408644	7.24019e+07	0.053714859437751	3.14729e+07	0.192307692307692	9.98946e+07	0.00208768267223382	8.39011e+06	0.0413306451612904	5.1861e+07	0.00568181818181818	3.78556e+07	0.0176908752327746	1.63408e+07	0.32687338501292	3.76298e+07	0.0576009501187648	3.1159e+07	0.0632754342431762	1.01731e+08	0.0188679245283019	4.08096e+06	0.00838574423480084	1.63348e+07	0	2.11318e+07	0.0909090909090909	1.15073e+07	0.0729166666666667	1.09314e+06	0.00179856115107914	2.42851e+07	0.208154506437769	2.39662e+07	0.0464788732394366	3.56504e+07	0.0751445086705202	4.71471e+07	0.0379310344827586	1.20812e+08	0.205357142857143	3.92018e+07
14	1	34034205	36036216	1012900	0.505941023330529	0.039832285115304	5.25022e+07	0.106090373280943	5.0007e+07	0.0637550200803212	1.54638e+07	0.186813186813187	4.89139e+07	0.00208768267223382	3.02401e+06	0.0403225806451613	2.57611e+07	0.00568181818181818	2.2384e+07	0.021415270018622	1.0901e+08	0.351421188630491	1.67976e+07	0.0570071258907363	1.44769e+07	0.06575682382134	4.49554e+07	0.0251572327044025	1.262e+06	0	998822	0	1.19786e+07	0.0909090909090909	7.1375e+06	0.0798611111111111	3.19278e+06	0	1.57572e+07	0.201716738197425	1.24833e+07	0.047887323943662	2.56185e+07	0.0722543352601156	4.50768e+07	0.0425287356321839	6.95831e+07	0.178571428571428	2.69636e+07
21	1	36036217	38038228	536927	0.268193697140677	0.0492662473794549	6.56781e+07	0.108055009823183	6.35146e+07	0.0747991967871486	2.87019e+07	0.192307692307693	8.46622e+06	0.00208768267223382	5.34855e+06	0.0453629032258065	3.9663e+07	0.0113636363636364	4.38261e+07	0.021415270018622	1.79935e+08	0.421188630490956	4.34495e+07	0.0581947743467933	2.59853e+06	0.0818858560794044	8.84918e+07	0.0220125786163522	3.23257e+06	0	1.38774e+07	0.00138121546961326	1.96796e+07	0.0844155844155844	2.23012e+07	0.0833333333333333	6.80465e+06	0.00359712230215827	2.63037e+07	0.208154506437768	2.96351e+07	0.0507042253521127	3.14821e+07	0.0838150289017341	5.71771e+07	0.0448275862068966	1.34122e+08	0.241071428571428	3.75784e+07
22	1	38038229	40040240	766938	0.383083617880413	0.0607966457023061	6.48499e+06	0.114931237721022	6.2114e+07	0.088855421686747	2.21506e+07	0.195970695970696	8.05997e+07	0.00208768267223382	46759	0.0504032258064516	3.83277e+07	0.0142045454545454	4.54143e+07	0.0223463687150838	1.11959e+08	0.458656330749354	2.92177e+07	0.0576009501187648	3.14195e+07	0.11414392059553401	7.38837e+07	0.0220125786163522	4.92168e+06	0.00209643605870021	1.26416e+07	0.00276243093922652	2.13719e+07	0.0909090909090909	6.71852e+06	0.0902777777777778	7.57838e+06	0.00359712230215827	2.80008e+07	0.216738197424893	2.23572e+07	0.0591549295774648	2.13952e+07	0.106936416184971	3.62133e+07	0.0482758620689655	9.82198e+07	0.25	3.71109e+07
26	1	40040241	42042252	707428	0.35335852132754503	0.0754716981132076	5.0534e+07	0.12573673870334	5.13607e+07	0.089859437751004	2.10146e+07	0.217948717948718	5.83124e+07	0.00208768267223382	4.15841e+06	0.0534274193548387	3.35087e+07	0.0170454545454546	2.28238e+07	0.0279329608938547	1.12152e+08	0.46640826873385	1.61458e+07	0.0558194774346793	2.23584e+07	0.13151364764268	6.35395e+07	0.0188679245283019	0	0	8.4713e+06	0.00276243093922652	1.26716e+07	0.0844155844155844	0	0.0868055555555556	0	0.00719424460431655	1.77052e+07	0.21244635193133	1.32121e+07	0.0661971830985915	2.78543e+07	0.101156069364162	3.48426e+07	0.0517241379310344	8.88714e+07	0.258928571428572	4.24561e+07
27	1	42042253	44044264	510178	0.254832638365804	0.079664570230608	7.20421e+07	0.12082514734774	7.11309e+07	0.0868473895582329	3.02541e+07	0.227106227106227	9.63758e+07	0.00208768267223382	6.90447e+06	0.0534274193548387	417485	0.0227272727272727	3.53913e+07	0.0251396648044692	1.63581e+08	0.441860465116279	4.68125e+07	0.0587885985748219	4.12483e+06	0.116625310173697	9.89578e+06	0.00943396226415097	3.068e+06	0.00104821802935011	2.0527e+07	0.00276243093922652	1.77791e+07	0.0779220779220779	2.2024e+07	0.09375	3.39672e+06	0.00719424460431655	3.2457e+07	0.216738197424893	2.6118e+07	0.0704225352112676	2.77122e+07	0.0895953757225433	4.40514e+07	0.0471264367816092	1.50232e+08	0.276785714285715	3.53295e+07
32	1	44044265	46046276	1307983	0.653334245748777	0.0712788259958071	3.81603e+07	0.116895874263261	3.03864e+07	0.080321285140562207	1.6242e+07	0.227106227106227	5.45522e+07	0.00208768267223382	193571	0.0504032258064516	2.15092e+06	0.0113636363636364	2.02842e+07	0.0223463687150838	7.04689e+07	0.406976744186047	1.57555e+07	0.0581947743467933	1.77289e+07	0.106699751861042	4.24481e+07	0.00628930817610063	1.31667e+06	0.00314465408805032	7.70582e+06	0.00276243093922652	1.06162e+07	0.0909090909090909	779755	0.0902777777777777	2.77153e+06	0.00539568345323741	1.55416e+07	0.21244635193133	1.02526e+07	0.0788732394366197	1.3536e+06	0.0809248554913295	2.49386e+07	0.0448275862068966	6.60042e+07	0.258928571428572	2.17097e+06
31	1	46046277	48048288	861060	0.430097322093973	0.0681341719077568	5.18657e+07	0.105108055009823	5.57308e+07	0.072289156626506	2.66919e+07	0.214285714285714	7.35122e+07	0.00208768267223382	3.85983e+06	0.0514112903225807	3.63143e+07	0.0113636363636364	3.18758e+07	0.0242085661080074	1.21543e+08	0.387596899224807	2.60467e+07	0.0576009501187649	3.07733e+07	0.104218362282878	7.2341e+07	0.00314465408805032	0	0.00104821802935011	1.31482e+07	0.00276243093922652	1.39768e+07	0.0974025974025974	1.26453e+07	0.0902777777777778	3.2298e+06	0.00539568345323741	2.43455e+07	0.208154506437768	3.40813e+07	0.076056338028169	3.61629e+07	0.0664739884393064	4.22687e+07	0.0379310344827587	8.41021e+07	0.25	3.36906e+07
5	1	48048289	50050300	1297506	0.64810101038355294	0.0587002096436059	1.45573e+07	0.0933202357563851	1.33008e+07	0.0742971887550201	363247	0.221611721611721	1.04039e+07	0.00208768267223382	423430	0.0493951612903226	6.04959e+06	0.0113636363636364	8.83175e+06	0.0204841713221601	2.01733e+07	0.373385012919897	4.23883e+06	0.0570071258907363	1.79745e+06	0.0918114143920596	1.20515e+07	0	0	0.00524109014675053	1.00999e+06	0.00276243093922652	617664	0.0909090909090909	6.73254e+06	0.09375	0	0.00899280575539567	5.51182e+06	0.21244635193133	1.27833e+06	0.0746478873239436	2.95022e+06	0.0578034682080925	9.124e+06	0.0344827586206896	1.75828e+07	0.178571428571428	1.16149e+06
7	1	50050301	52052312	1116768	0.557822830232786	0.0587002096436059	9.2713e+06	0.0893909626719057	9.26527e+06	0.0763052208835341	2.87686e+06	0.21978021978022	1.08545e+07	0.00208768267223382	309391	0.0483870967741935	6.15786e+06	0.0113636363636364	715132	0.0223463687150838	2.03701e+07	0.370801033591731	2.66899e+06	0.0546318289786223	3.56399e+06	0.0893300248138958	1.33653e+07	0	0	0.00314465408805032	1.51522e+06	0.00276243093922652	1.94439e+06	0.0909090909090909	1.22983e+06	0.104166666666667	3.10505e+06	0.00719424460431655	4.35292e+06	0.208154506437768	3.72908e+06	0.0788732394366197	452044	0.0578034682080925	7.93982e+06	0.032183908045977	1.48483e+07	0.1875	5.53423e+06
21	1	52052313	54054324	914352	0.456716543157583	0.059748427672956	4.51245e+06	0.0923379174852652	4.19845e+06	0.0798192771084338	2.0742e+07	0.21978021978022	6.64805e+07	0.00208768267223382	3.24325e+06	0.0423387096774194	2.9119e+07	0.0113636363636364	2.86001e+07	0.0176908752327746	9.77827e+07	0.373385012919896	1.43262e+07	0.0558194774346793	2.05793e+06	0.086848635235732	6.45001e+07	0	1.71366e+06	0.00314465408805032	5.17241e+06	0.00276243093922652	1.4932e+07	0.0909090909090909	3.8915e+06	0.104166666666667	1.58903e+06	0.00719424460431655	1.66639e+07	0.221030042918455	2.00167e+07	0.0830985915492957	1.50214e+07	0.0635838150289018	3.13478e+07	0.0344827586206896	7.04319e+07	0.223214285714286	3.38117e+07
23	1	54054325	56056336	757173	0.378206024739112	0.0587002096436059	4.92151e+07	0.0864440078585462	4.16054e+07	0.0768072289156626	1.71743e+07	0.21978021978022	5.36999e+07	0.00208768267223382	2.3337e+06	0.0403225806451613	2.99967e+07	0.0113636363636364	2.74506e+07	0.015828677839851	8.04216e+07	0.377260981912145	1.15308e+06	0.0576009501187648	2.55483e+07	0.0905707196029777	5.63748e+07	0	0	0.00314465408805032	9.94611e+06	0.00276243093922652	1.59881e+07	0.0909090909090909	8.97103e+06	0.100694444444445	8.32119e+06	0.00719424460431655	1.96743e+07	0.23175965665236	2.72005e+07	0.0887323943661971	2.48683e+07	0.0578034682080924	365531	0.0367816091954023	6.11469e+07	0.223214285714286	6.71079e+07
6	1	57057343	59059354	501323	0.250409587954518	0.0587002096436059	2.32746e+07	0.0864440078585462	3.82119e+07	0.0833333333333333	1.23355e+06	0.223443223443223	1.7488e+07	0.00208768267223382	47428.4	0.0433467741935484	2.48308e+07	0.0113636363636364	1.03139e+07	0.0111731843575419	8.5237e+07	0.350129198966408	9.15274e+06	0.0564133016627078	1.491e+07	0.0942928039702234	3.65502e+06	0	0	0.00524109014675053	4.19101e+06	0.00276243093922652	2.40674e+06	0.0844155844155844	0	0.104166666666667	8.69326e+06	0.00359712230215827	9.34385e+06	0.257510729613734	1.22267e+07	0.0873239436619718	1.04819e+07	0.0520231213872832	1.95436e+07	0.035632183908046	3.06367e+07	0.1875	2.08373e+07
7	1	59059355	61061366	655002	0.327171865103705	0.0555555555555556	2.08342e+07	0.0913555992141453	7.79422e+06	0.0838353413654618	68674	0.228937728937729	1.35628e+07	0.00208768267223382	1.30844e+06	0.0423387096774194	9.31998e+06	0.0113636363636364	5.94767e+06	0.0111731843575419	2.49487e+07	0.346253229974161	7.36315e+06	0.0564133016627078	7.586e+06	0.0942928039702233	1.66531e+07	0	3.18277e+06	0.00104821802935011	2.70417e+06	0.00276243093922652	4.15182e+06	0.0779220779220779	2.60883e+06	0.100694444444445	2.89342e+06	0.00359712230215827	4.46756e+06	0.263948497854077	9.997e+06	0.0859154929577464	8.84927e+06	0.0635838150289017	6.64109e+06	0.0379310344827586	2.66389e+07	0.178571428571429	1.59091e+07
6	1	61061367	63063378	574171	0.286796982235871	0.0587002096436059	4.63596e+07	0.0913555992141453	5.13635e+07	0.0853413654618474	2.00496e+07	0.234432234432234	5.61995e+07	0.00208768267223382	2.8813e+06	0.0403225806451613	2.54772e+07	0.0113636363636364	1.17315e+07	0.0121042830540037	9.61911e+07	0.342377260981912	1.58285e+07	0.0593824228028503	2.65969e+07	0.0905707196029777	4.60888e+07	0.00628930817610063	9.72693e+06	0.00209643605870021	6.40336e+06	0.00276243093922652	1.20877e+07	0.0779220779220779	0	0.0972222222222222	6.8267e+06	0.00179856115107914	1.18289e+07	0.257510729613734	2.01933e+07	0.0873239436619718	2.67117e+07	0.069364161849711	2.67164e+07	0.0413793103448276	5.87883e+07	0.169642857142857	4.45194e+07
12	1	63063379	65065390	988320	0.493663374645107	0.0513626834381551	1.44773e+07	0.0893909626719057	1.02916e+07	0.0783132530120482	7.35457e+06	0.225274725274725	1.87262e+07	0.00208768267223382	138405	0.0372983870967742	6.49861e+06	0.0113636363636364	7.81784e+06	0.0111731843575419	3.80319e+07	0.329457364341086	6.11826e+06	0.0581947743467933	4.75774e+06	0.0880893300248139	2.01191e+07	0.00628930817610063	282474	0.00104821802935011	2.63548e+06	0.00276243093922652	5.26916e+06	0.0779220779220779	1.27139e+06	0.0868055555555556	0	0.00359712230215827	6.25565e+06	0.255364806866953	5.25234e+06	0.0915492957746478	9.54285e+06	0.0635838150289018	750766	0.0367816091954023	2.60443e+07	0.178571428571429	1.64565e+07
10	1	65065391	67067402	1064625	0.531777531803006	0.0471698113207547	2.62876e+07	0.0884086444007859	2.2143e+07	0.0778112449799197	7.93448e+06	0.225274725274725	2.55532e+07	0.00208768267223382	1.83518e+06	0.033266129032258	1.22106e+06	0.0113636363636364	5.98822e+06	0.0121042830540037	4.35937e+07	0.308785529715763	6.15319e+06	0.0581947743467933	4.83457e+06	0.0794044665012407	2.06986e+07	0.00628930817610065	1.74129e+06	0.00209643605870021	3.10812e+06	0.00276243093922652	4.70121e+06	0.0779220779220779	0	0.0902777777777778	0	0.00359712230215827	4.07565e+06	0.248927038626609	5.54305e+06	0.0929577464788732	1.11565e+07	0.0578034682080925	1.33329e+07	0.032183908045977	2.97504e+07	0.178571428571429	2.22014e+06
14	1	67067403	69069414	619877	0.309627015222686	0.0492662473794549	4.7865e+07	0.093320235756385	6.97931e+07	0.0742971887550201	1.84736e+07	0.216117216117216	5.16117e+07	0.00208768267223382	2.74734e+06	0.0282258064516129	3.00014e+07	0.0113636363636364	2.71521e+07	0.0121042830540037	8.58396e+07	0.303617571059432	8.9827e+06	0.0581947743467933	2.06853e+07	0.0856079404466502	4.82617e+07	0	0	0.00733752620545074	859800	0.00552486187845304	1.18899e+07	0.0779220779220779	5.24983e+06	0.0972222222222222	6.9719e+08	0.00539568345323741	8.60187e+06	0.240343347639485	1.53373e+07	0.0901408450704225	2.80894e+07	0.046242774566474	2.99892e+07	0.0333333333333334	8.06871e+07	0.1875	1.09484e+07
8	1	70070421	72072432	979963	0.489489073991565	0.0482180293501048	3.89129e+07	0.0884086444007859	3.56964e+07	0.0707831325301204	6.23223e+06	0.216117216117216	1.79985e+07	0.00208768267223382	623482	0.0272177419354839	1.52868e+07	0.0113636363636364	1.13627e+07	0.0148975791433892	4.58125e+07	0.285529715762274	8.21553e+06	0.0558194774346793	6.4891e+06	0.0880893300248139	2.04025e+07	0	1.72e+06	0.00733752620545074	2.46955e+06	0.00276243093922652	5.00517e+06	0.0584415584415584	0	0.104166666666667	776281	0.00719424460431655	4.51103e+06	0.236051502145923	621679	0.0873239436619718	1.27305e+07	0.0520231213872833	1.53539e+07	0.025287356321839	2.76405e+07	0.1875	1.03131e+06
4	1	72072433	75075450	1148701	0.57377328407622	0.0513626834381551	4.56121e+07	0.0854616895874263	3.87408e+06	0.0697791164658634	5.24184e+06	0.212454212454212	1.19192e+07	0.00208768267223382	664892	0.0252016129032258	1.25887e+07	0.0113636363636364	9.07167e+06	0.015828677839851	4.00472e+06	0.279069767441861	793102	0.0576009501187648	6.38299e+06	0.086848635235732	1.64278e+07	0	0	0.00419287211740042	5.08113e+06	0.00276243093922652	4.20934e+06	0.0649350649350649	3.98935e+06	0.104166666666667	1.90483e+06	0.00719424460431655	3.24603e+06	0.251072961373391	9.87286e+06	0.0845070422535211	1.00808e+07	0.0520231213872832	1.63213e+07	0.0218390804597701	3.23872e+07	0.196428571428571	1.11282e+07
9	1	75075451	77077462	1126926	0.562896725893751	0.0534591194968553	4.12316e+07	0.0785854616895874	3.28224e+07	0.0672690763052209	6.47825e+06	0.212454212454212	1.47213e+07	0.00208768267223382	505876	0.0241935483870968	1.06331e+07	0.0113636363636364	8.76904e+06	0.0186219739292365	3.85422e+07	0.277777777777778	8.52216e+06	0.0587885985748219	6.05888e+06	0.0893300248138958	1.31868e+06	0	0	0.00314465408805032	3.4392e+06	0.00276243093922652	3.55077e+06	0.0714285714285714	2.27644e+06	0.114583333333333	626559	0.00539568345323741	5.59042e+06	0.253218884120172	5.31883e+06	0.0859154929577464	1.09756e+07	0.0549132947976878	1.34407e+07	0.0310344827586207	2.31398e+06	0.196428571428571	3.6934e+06
12	1	77077463	79079474	933497	0.466279422900562	0.0482180293501048	4.22009e+07	0.0825147347740668	3.50175e+07	0.070281124497992	1.00405e+07	0.21062271062271	2.7866e+07	0.00208768267223382	545725	0.0241935483870968	2.28925e+06	0.0142045454545454	1.61451e+07	0.0186219739292365	8.34599e+07	0.277777777777778	8.37398e+06	0.0581947743467933	9.59749e+06	0.086848635235732	3.00261e+07	0	0	0.0115303983228512	480755	0.00276243093922652	9.37566e+06	0.0779220779220779	1.47852e+06	0.111111111111111	1.66582e+06	0.00719424460431655	9.5103e+06	0.248927038626609	8.98811e+06	0.0873239436619718	1.38052e+07	0.0491329479768786	2.00355e+07	0.0252873563218391	4.67392e+06	0.196428571428571	331644
9	1	79079475	85085510	362253	0.180944469863318	0.0450733752620545	2.89814e+08	0.0864440078585462	2.92256e+08	0.0662650602409638	5.56609e+07	0.205128205128205	1.18137e+07	0.00208768267223382	1.29967e+07	0.0231854838709677	1.09502e+08	0.0113636363636364	1.02281e+08	0.0195530726256983	3.61862e+08	0.267441860465116	436704	0.0581947743467933	5.03864e+07	0.0831265508684863	1.64322e+08	0.00314465408805032	0	0.010482180293501	1.07299e+07	0.00276243093922652	1.84397e+07	0.0584415584415584	3.70923e+07	0.111111111111111	1.76109e+07	0.00719424460431655	2.81093e+07	0.246781115879829	4.05511e+07	0.0873239436619718	7.73445e+07	0.0433526011560693	1.08415e+08	0.0241379310344828	2.833e+08	0.196428571428571	6.74832e+07
14	1	85085511	87087522	984555	0.491782766536863	0.0450733752620545	3.30005e+07	0.0854616895874264	4.23171e+07	0.0662650602409638	1.39005e+07	0.199633699633699	2.69046e+07	0.00208768267223382	1.0302e+06	0.0241935483870968	2.04263e+07	0.0113636363636364	1.94885e+07	0.0204841713221601	7.89845e+07	0.285529715762274	1.32525e+07	0.0587885985748219	1.58284e+07	0.0843672456575683	3.47739e+07	0	0	0.00943396226415092	7.57673e+06	0.00276243093922652	1.11987e+07	0.051948051948052	4.58658e+06	0.118055555555556	0	0.00719424460431655	9.47123e+06	0.233905579399142	1.11849e+06	0.0929577464788732	2.05287e+06	0.0317919075144509	1.40204e+07	0.0264367816091954	5.22855e+07	0.223214285714286	1.94069e+07
14	1	87087523	90090540	555306	0.277373961794435	0.0429769392033543	4.24484e+07	0.0864440078585462	4.76203e+07	0.0707831325301204	1.82958e+07	0.195970695970696	6.30543e+07	0.00208768267223382	266613	0.0231854838709677	2.6777e+07	0.0113636363636364	1.77566e+07	0.021415270018622	9.49142e+07	0.289405684754522	1.08831e+07	0.0587885985748219	1.61269e+07	0.0856079404466501	4.83767e+07	0	3.38229e+06	0.00838574423480086	1.19725e+07	0.00276243093922652	1.17769e+07	0.0454545454545455	7.97019e+06	0.121527777777778	3.42644e+06	0.0107913669064748	896283	0.227467811158798	2.29902e+07	0.0943661971830985	1.63831e+07	0.023121387283237	3.60883e+07	0.0229885057471264	7.22946e+07	0.214285714285714	3.76503e+07
7	1	90090541	92092552	296482	0.148092019428455	0.0450733752620545	6.69812e+06	0.0825147347740668	7.23926e+07	0.0737951807228916	3.15178e+07	0.19047619047619	5.32282e+07	0.00208768267223382	1.79989e+06	0.0221774193548387	5.05851e+07	0.0113636363636364	5.70446e+07	0.0232774674115456	1.71454e+08	0.289405684754522	2.70779e+07	0.0593824228028503	2.28454e+07	0.0831265508684864	5.74267e+07	0	4.7697e+06	0.0146750524109015	2.47981e+07	0.00276243093922652	1.15964e+07	0.038961038961039	0	0.125	0	0.00179856115107914	4.34609e+07	0.223175965665236	3.69427e+07	0.0957746478873237	3.05833e+07	0.023121387283237	6.92588e+07	0.0252873563218391	1.28255e+08	0.205357142857143	3.76563e+07
17	1	92092553	94094564	1063806	0.531368443345994	0.0408805031446541	2.46507e+07	0.0805500982318271	1.98767e+07	0.0692771084337349	1.23071e+07	0.188644688644689	3.77225e+07	0.00208768267223382	3.0085e+06	0.0221774193548387	1.53445e+07	0.0113636363636364	1.37116e+07	0.021415270018622	5.75663e+07	0.297157622739018	6.35487e+06	0.0581947743467933	9.19628e+06	0.0806451612903226	3.29172e+07	0	1.78724e+06	0.00524109014675053	4.42173e+06	0.00276243093922652	7.4013e+06	0.038961038961039	0	0.118055555555556	5.0193e+06	0	1.04683e+07	0.218884120171674	1.23837e+07	0.0901408450704225	9.3709e+06	0.0260115606936416	1.68277e+07	0.0218390804597701	3.89556e+07	0.214285714285714	1.76356e+07
11	1	94094565	96096576	572810	0.286117166130873	0.0408805031446541	2.82075e+07	0.0795677799607072	2.09726e+07	0.0677710843373494	1.6323e+07	0.184981684981685	3.10904e+07	0.00208768267223382	2.21509e+06	0.0231854838709677	2.14346e+07	0.0113636363636364	2.06459e+07	0.021415270018622	7.92103e+07	0.294573643410853	8.60369e+06	0.0593824228028503	1.20861e+07	0.0806451612903226	3.94515e+06	0	2.9316e+06	0.00943396226415092	4.44051e+06	0.00276243093922652	1.10713e+07	0.038961038961039	3.06485e+06	0.118055555555556	0	0	1.74645e+07	0.210300429184549	9.59288e+06	0.0901408450704225	1.78698e+07	0.0317919075144509	1.31413e+07	0.0275862068965517	4.87795e+07	0.205357142857143	2.4736e+06
3	1	97097583	99099594	933488	0.466274927423012	0.0324947589098532	4.71178e+06	0.0854616895874264	8.30161e+06	0.0637550200803212	1.44179e+06	0.183150183150183	8.73725e+06	0.00208768267223382	324727	0.0231854838709677	532936	0.0113636363636364	5.65186e+06	0.0204841713221601	1.75116e+07	0.306201550387597	4.25554e+06	0.0587885985748219	1.16772e+06	0.0781637717121588	7.10663e+06	0	0	0.00838574423480084	175220	0.00414364640883978	2.07195e+06	0.038961038961039	0	0.121527777777778	1.44762e+06	0.00359712230215827	1.67777e+06	0.1931330472103	5.39496e+06	0.0887323943661971	3.43116e+06	0.0317919075144509	5.41876e+06	0.0229885057471264	8.38267e+06	0.205357142857143	4.18635e+06
12	1	99099595	101101606	613337	0.306360301536654	0.0314465408805032	6.21433e+07	0.0825147347740668	1.11989e+08	0.0627510040160642	1.59862e+07	0.181318681318681	7.95895e+07	0.00208768267223382	2.4902e+06	0.0241935483870968	4.09425e+07	0.0113636363636364	3.61823e+07	0.0204841713221601	1.24767e+08	0.310077519379845	2.08612e+07	0.0599762470308789	1.05094e+07	0.0794044665012407	5.0236e+07	0	1.08113e+07	0.0136268343815514	1.34431e+07	0.00276243093922652	1.36391e+07	0.0454545454545455	6.47328e+06	0.118055555555556	0	0.00179856115107914	1.56211e+07	0.193133047210301	2.08547e+07	0.0887323943661971	2.64866e+07	0.046242774566474	5.14368e+07	0.0275862068965518	7.86817e+07	0.214285714285714	6.69734e+07
6	1	101101607	103103618	340598	0.17012785138151	0.0335429769392034	4.71808e+07	0.0785854616895874	5.2201e+07	0.0662650602409638	1.05591e+07	0.186813186813187	3.44299e+07	0.00208768267223382	4.24899e+06	0.0221774193548387	3.10479e+07	0.0113636363636364	1.59768e+06	0.0204841713221601	8.90113e+07	0.313953488372093	2.31078e+07	0.0593824228028504	966530	0.0744416873449132	4.85483e+07	0	1.27112e+07	0.0157232704402516	7.29468e+06	0.00276243093922652	1.83017e+06	0.051948051948052	0	0.121527777777778	6.19806e+06	0.00179856115107914	3.87614e+06	0.190987124463519	1.82186e+06	0.0887323943661971	1.03464e+07	0.0375722543352601	4.1612e+07	0.0275862068965517	4.58292e+07	0.205357142857143	1.87664e+07
7	1	103103619	105105630	296644	0.148172938024348	0.0345911949685535	1.77434e+08	0.0756385068762279	1.80864e+08	0.072289156626506	2.39608e+07	0.186813186813187	8.53749e+07	0.00208768267223382	3.39014e+06	0.0221774193548387	8.66044e+07	0.0113636363636364	2.58137e+07	0.021415270018622	2.20119e+07	0.30749354005168	2.71268e+07	0.0587885985748219	4.27204e+07	0.0719602977667494	9.41272e+07	0	8.49616e+06	0.0167714884696017	1.63021e+07	0.00276243093922652	2.46691e+07	0.051948051948052	0	0.125	3.58554e+06	0.00539568345323741	1.4214e+07	0.175965665236052	2.83265e+06	0.0915492957746478	5.85325e+07	0.0404624277456647	1.78048e+07	0.0264367816091954	1.76854e+08	0.214285714285714	7.89824e+07
7	1	107107643	109109654	827582	0.413375144604528	0.030398322851153	1.44792e+07	0.0756385068762279	2.41764e+07	0.0783132530120482	3.6447e+08	0.192307692307692	9.49155e+06	0.00208768267223382	314426	0.0252016129032258	4.57307e+06	0.0113636363636364	6.43413e+06	0.0195530726256983	3.13862e+07	0.303617571059431	6.24723e+06	0.0605700712589074	1.88624e+06	0.0794044665012407	1.1505e+07	0	0	0.0146750524109015	3.60204e+06	0.00276243093922652	1.67606e+06	0.051948051948052	4.39879e+06	0.128472222222222	1.36347e+06	0.00899280575539567	3.54616e+06	0.160944206008584	7.90787e+06	0.0901408450704225	9.30921e+06	0.0491329479768786	9.04517e+06	0.0310344827586207	2.29245e+07	0.223214285714286	2.81034e+06
43	1	109109655	111111666	785778	0.39249415088421	0.0345911949685535	8.7957e+06	0.0776031434184676	8.52076e+07	0.0828313253012049	3.17321e+07	0.184981684981685	1.17386e+08	0.00208768267223382	6.43286e+06	0.0181451612903226	4.90541e+07	0.00568181818181818	54074.3	0.0186219739292365	2.08037e+07	0.320413436692506	4.44469e+07	0.0611638954869359	3.10704e+07	0.0818858560794044	1.23207e+08	0	200395	0.0146750524109015	276260	0.00276243093922652	2.48424e+07	0.051948051948052	1.56578e+07	0.135416666666667	3.52864e+06	0.00899280575539567	3.95419e+07	0.150214592274678	3.23736e+07	0.0957746478873239	4.12991e+07	0.0433526011560693	6.20686e+06	0.0379310344827586	1.62461e+08	0.25	6.60728e+07
20	1	111111667	113113678	531813	0.265639266897502	0.030398322851153	9.29459e+07	0.0766208251473477	6.70212e+06	0.0808232931726907	3.42431e+07	0.184981684981685	9.40405e+07	0.00208768267223382	4.45604e+06	0.0161290322580645	5.71971e+06	0.00568181818181818	4.83106e+07	0.0204841713221601	1.89356e+08	0.30749354005168	3.50984e+07	0.0581947743467933	3.2735e+07	0.0905707196029776	942109	0.00314465408805032	0	0.00943396226415092	2.45461e+07	0.00276243093922652	2.80124e+07	0.0584415584415584	0	0.138888888888889	1.21288e+06	0.0107913669064748	1.7498e+07	0.143776824034335	2.37275e+07	0.0943661971830985	2.55717e+07	0.046242774566474	5.02512e+07	0.035632183908046	1.38233e+08	0.258928571428572	1.40908e+08
20	1	113113679	115115690	875178	0.437149227876756	0.0345911949685535	3.87462e+07	0.0766208251473477	3.4147e+07	0.0883534136546184	1.71117e+07	0.192307692307692	6.53304e+07	0.00208768267223382	1.88605e+06	0.0161290322580645	2.25397e+07	0.00852272727272729	2.69027e+07	0.0186219739292365	7.24177e+07	0.313953488372093	2.42649e+06	0.0570071258907363	1.70057e+07	0.107940446650124	4.48535e+07	0.00314465408805032	0	0.00838574423480084	9.67359e+06	0.00276243093922652	1.3313e+07	0.0649350649350649	9.23621e+06	0.142361111111111	3.02577e+06	0.00899280575539567	1.85852e+07	0.143776824034335	1.97768e+07	0.0985915492957744	1.57547e+07	0.069364161849711	2.35049e+07	0.0367816091954023	5.79038e+07	0.276785714285715	2.20205e+07
17	1	115115691	117117702	593136	0.296269952427857	0.0356394129979036	4.18141e+07	0.0874263261296661	4.36393e+07	0.0988955823293173	1.9601e+07	0.194139194139194	4.33325e+07	0.00208768267223382	1.808e+07	0.0181451612903226	1.96928e+07	0.03125	2.93535e+07	0.021415270018622	1.34358e+08	0.325581395348837	1.71131e+07	0.0558194774346793	2.71444e+07	0.11166253101737	4.60292e+06	0.00943396226415097	0	0.0146750524109015	5.7209e+06	0.00276243093922652	1.28615e+07	0.051948051948052	3.20391e+06	0.152777777777778	1.10137e+07	0.00719424460431655	1.5509e+06	0.143776824034335	1.78408e+07	0.10281690140845	2.80134e+07	0.0895953757225433	4.53825e+07	0.0344827586206897	6.81851e+07	0.303571428571429	1.6681e+07
11	1	117117703	119119714	777678	0.388448221089584	0.0566037735849057	5.02981e+07	0.0923379174852652	3.79765e+07	0.125502008032128	1.39686e+07	0.203296703296703	5.15029e+07	0.00208768267223382	2.01018e+06	0.0241935483870968	2.60963e+07	0.0340909090909091	2.28677e+07	0.0288640595903166	1.04187e+08	0.369509043927648	1.04707e+07	0.0540380047505938	2.10265e+07	0.130272952853598	5.30501e+07	0.0125786163522013	2.04078e+06	0.0220125786163522	5.65674e+06	0.00276243093922652	6.47945e+06	0.051948051948052	6.22938e+06	0.149305555555555	937655	0.00359712230215827	1.4159e+07	0.169527896995708	1.32338e+07	0.109859154929578	1.72167e+07	0.104046242774567	3.04656e+06	0.0379310344827586	5.64758e+07	0.303571428571429	354982
13	1	119119715	121121726	429432	0.214500212785938	0.10482180293501	5.26928e+07	0.156188605108055	7.39198e+06	0.170180722891566	2.01542e+07	0.234432234432234	5.72797e+07	0.00626304801670146	342989	0.0433467741935484	3.19376e+07	0.0823863636363634	3.5558e+07	0.0437616387337057	9.44706e+07	0.397932816537467	3.16155e+07	0.0576009501187649	2.48169e+06	0.135235732009926	5.60939e+06	0.0220125786163522	6.36282e+06	0.0293501048218029	1.32763e+07	0.0151933701657459	1.46516e+07	0.0714285714285714	0	0.138888888888889	827667	0.00539568345323741	1.43957e+07	0.180257510729614	2.18866e+07	0.138028169014084	2.74464e+07	0.135838150289017	2.98986e+07	0.0632183908045977	7.97796e+07	0.357142857142857	4.42064e+07
3	1	143143859	145145870	157518	0.0786798480728386	0.132075471698113	1.87551e+08	0.202357563850688	1.04891e+08	0.189759036144578	3.78169e+07	0.245421245421245	1.92001e+08	0.0104384133611691	1.06269e+07	0.0524193548387097	4.6068e+07	0.107954545454545	3.49107e+07	0.0521415270018622	2.02905e+08	0.41343669250646	4.6537e+07	0.0605700712589074	3.25651e+07	0.129032258064516	1.00068e+08	0.0314465408805031	2.52831e+06	0.0314465408805031	1.63338e+06	0.0248618784530387	5.32153e+07	0.0649350649350649	4.75359e+06	0.131944444444444	864183	0.00719424460431655	2.05117e+07	0.184549356223176	6.65733e+07	0.171830985915493	2.67528e+07	0.144508670520231	9.01103e+07	0.0804597701149425	1.74374e+08	0.375	2.19647e+06
21	1	145145871	147147882	482408	0.240961592637807	0.132075471698113	8.72992e+07	0.202357563850688	6.71869e+07	0.189759036144578	4.00188e+07	0.245421245421245	1.15602e+08	0.0104384133611691	8.39334e+06	0.0524193548387097	4.59241e+06	0.107954545454545	3.25828e+07	0.0521415270018622	1.5e+08	0.41343669250646	5.06856e+07	0.0605700712589074	2.11466e+07	0.129032258064516	9.49181e+07	0.0314465408805031	3.14822e+06	0.0314465408805031	1.49948e+07	0.0248618784530387	2.19462e+07	0.0649350649350649	1.36457e+07	0.131944444444444	5.32641e+06	0.00719424460431655	2.67807e+06	0.184549356223176	2.60882e+07	0.171830985915493	3.78112e+07	0.144508670520231	6.7607e+07	0.0804597701149425	1.05959e+08	0.375	1.36751e+07
4	1	147147883	148148888	67374	0.0673062898723884	0.132075471698113	1.19202e+08	0.202357563850688	1.28736e+08	0.189759036144578	3.93055e+07	0.245421245421245	5.06818e+07	0.0104384133611691	6.26267e+06	0.0524193548387097	4.66956e+07	0.107954545454545	8.84654e+07	0.0521415270018622	1.73011e+08	0.41343669250646	4.74418e+07	0.0605700712589074	4.20252e+07	0.129032258064516	9.95271e+07	0.0314465408805031	1.06781e+07	0.0314465408805031	2.58693e+07	0.0248618784530387	3.06483e+07	0.0649350649350649	2.15109e+07	0.131944444444444	0	0.00719424460431655	2.31012e+07	0.184549356223176	3.24427e+06	0.171830985915493	5.6494e+07	0.144508670520231	3.11382e+07	0.0804597701149425	1.24632e+08	0.375	4.63829e+07
39	1	149149895	151151906	668401	0.333864632180027	0.360587002096436	1.08199e+08	0.548133595284872	1.15957e+08	0.63855421686747	606724	0.461538461538462	1.59259e+08	0.0480167014613779	9.12163e+06	0.138104838709677	7.66548e+07	0.221590909090909	4.94198e+06	0.161080074487896	2.06775e+08	0.634366925064599	5.10483e+06	0.088479809976247	3.41709e+07	0.370967741935484	1.21758e+08	0.182389937106918	675897	0.0681341719077568	2.03903e+07	0.0662983425414365	3.13122e+07	0.25974025974026	1.65915e+07	0.256944444444444	1.22453e+07	0.0539568345323741	4.12886e+07	0.334763948497854	4.76215e+07	0.670422535211267	2.58697e+07	0.309248554913295	9.11392e+07	0.220689655172414	1.6032e+08	0.607142857142857	5.72207e+07
63	1	151151907	153153918	469424	0.234476117026272	0.367924528301887	9.29792e+08	0.552062868369352	1.3143e+09	0.643072289156627	3.18857e+08	0.461538461538462	7.37125e+07	0.0480167014613779	3.20984e+07	0.136088709677419	4.78001e+08	0.221590909090909	4.14841e+08	0.164804469273743	1.37051e+09	0.612403100775194	4.40406e+08	0.0866983372921615	3.83429e+07	0.361042183622829	6.12515e+07	0.182389937106918	2.90232e+06	0.0607966457023061	1.62788e+08	0.0649171270718232	1.49214e+08	0.25974025974026	1.07726e+08	0.253472222222222	7.50014e+07	0.0521582733812949	1.21361e+08	0.34549356223176	2.83285e+08	0.687323943661972	3.76455e+08	0.320809248554913	6.97526e+08	0.22183908045977	1.12048e+09	0.633928571428572	8.208e+08
65	1	153153919	155155930	909614	0.454349923976479	0.360587002096436	9.97933e+07	0.549115913555992	7.89922e+07	0.645080321285141	4.03978e+07	0.461538461538462	1.0763e+08	0.0480167014613779	7.49666e+06	0.136088709677419	4.49393e+07	0.221590909090909	5.26589e+06	0.166666666666667	1.76198e+08	0.612403100775194	3.28669e+07	0.0902612826603326	3.17699e+07	0.343672456575682	1.09812e+08	0.172955974842767	766930	0.0649895178197065	1.80733e+07	0.0662983425414365	2.85505e+07	0.25974025974026	1.50268e+07	0.25	5.39709e+06	0.0539568345323741	3.94688e+07	0.321888412017168	3.83853e+07	0.701408450704226	3.05008e+07	0.309248554913295	5.64644e+07	0.220689655172414	1.24417e+08	0.580357142857142	7.39619e+07
57	1	155155931	157157942	1023893	0.511431999408595	0.359538784067086	1.14984e+08	0.536345776031435	1.13601e+08	0.63855421686747	4.66921e+06	0.467032967032967	1.52809e+07	0.0480167014613779	8.19372e+06	0.136088709677419	6.39248e+07	0.224431818181818	7.66743e+07	0.16852886405959	2.00915e+08	0.591731266149871	4.12144e+07	0.0926365795724466	3.40232e+07	0.331265508684863	1.14998e+08	0.166666666666667	534820	0.0471698113207547	2.55221e+07	0.0662983425414365	2.99303e+07	0.25974025974026	2.11792e+07	0.25	7.52032e+06	0.0557553956834533	4.62183e+07	0.313304721030043	3.968e+07	0.702816901408451	5.0118e+07	0.312138728323699	7.67575e+07	0.206896551724138	1.64454e+08	0.607142857142857	8.78597e+07
30	1	157157943	159159954	361642	0.180639276887452	0.354297693920335	4.67438e+08	0.523575638506876	4.45483e+08	0.647590361445783	8.28973e+06	0.45970695970696	1.41717e+08	0.0490605427974948	1.11319e+07	0.140120967741935	1.42321e+08	0.221590909090909	1.33926e+08	0.170391061452514	3.59752e+08	0.581395348837209	5.64127e+07	0.083729216152019	7.00557e+07	0.352357320099255	1.83422e+08	0.160377358490566	1.10664e+07	0.0471698113207547	7.54402e+07	0.0649171270718232	3.93844e+07	0.25974025974026	4.08521e+07	0.25	1.4683e+07	0.0575539568345324	2.80383e+07	0.306866952789699	8.05313e+07	0.697183098591549	1.04433e+08	0.329479768786127	2.08494e+07	0.201149425287356	3.46591e+08	0.616071428571428	2.2407e+08
51	1	159159955	161161966	589886	0.294646585534951	0.355345911949686	2.37774e+08	0.526522593320236	2.49987e+08	0.660642570281124	7.96448e+07	0.470695970695971	1.57553e+07	0.0501043841336117	1.35728e+07	0.145161290322581	1.04164e+08	0.221590909090909	9.69258e+07	0.173184357541899	3.4483e+08	0.578811369509044	5.02384e+07	0.0819477434679335	5.46125e+07	0.39454094292804	1.59897e+07	0.166666666666667	8.27283e+06	0.0492662473794549	3.50341e+06	0.0662983425414365	4.52912e+07	0.25974025974026	2.86508e+06	0.246527777777778	1.15569e+07	0.0575539568345324	4.61071e+07	0.304721030042918	5.91803e+07	0.704225352112676	5.07234e+07	0.355491329479768	1.39359e+08	0.206896551724138	2.69004e+08	0.625	1.56176e+08
29	1	161161967	163163978	911877	0.455480286831447	0.353249475890986	5.85916e+07	0.518664047151277	5.96686e+07	0.655622489959839	1.36359e+07	0.465201465201465	6.00561e+07	0.0490605427974948	49290.8	0.145161290322581	2.82949e+07	0.21875	2.55518e+07	0.175046554934823	8.10351e+07	0.576227390180879	1.64312e+07	0.0807600950118765	1.57267e+07	0.385856079404467	4.37362e+07	0.163522012578616	0	0.0461215932914046	815816	0.0676795580110497	8.57589e+06	0.25974025974026	4.00995e+06	0.25	3.52389e+06	0.0575539568345324	1.39751e+07	0.28755364806867	1.49839e+07	0.708450704225352	1.94654e+06	0.346820809248555	1.92204e+07	0.202298850574713	6.132e+07	0.616071428571428	3.1064e+07
3	1	163163979	165165990	324918	0.162295730495122	0.355345911949685	2.68536e+07	0.505893909626719	4.10169e+07	0.658634538152611	8.5025e+06	0.468864468864469	2.96153e+07	0.0511482254697286	0	0.143145161290323	1.60528e+07	0.213068181818182	3.90234e+06	0.173184357541899	7.36055e+07	0.559431524547804	9.1025e+06	0.080166270783848	1.57647e+06	0.373449131513648	3.97762e+06	0.163522012578616	140568	0.0440251572327044	4.18335e+06	0.0662983425414365	0	0.25974025974026	0	0.253472222222222	0	0.0575539568345324	6.8462e+06	0.289699570815451	0	0.704225352112676	0	0.355491329479768	1.5279e+06	0.205747126436782	1.60493e+06	0.616071428571428	8.71523e+06
12	1	165165991	167168002	584494	0.291953294985244	0.353249475890985	9.08375e+07	0.495088408644401	1.05858e+08	0.656124497991968	9.2633e+06	0.465201465201465	7.78174e+07	0.0501043841336117	3.13691e+06	0.141129032258065	3.87599e+07	0.210227272727273	4.44775e+07	0.174115456238361	1.05159e+08	0.560723514211886	2.99647e+07	0.080166270783848	1.73527e+07	0.362282878411911	4.42617e+07	0.163522012578616	0	0.0429769392033543	5075.84	0.0649171270718232	1.01831e+07	0.253246753246753	1.01703e+07	0.25	3.036e+06	0.0593525179856115	1.73572e+07	0.289699570815451	2.14334e+07	0.707042253521127	25654.7	0.352601156069364	3.43289e+07	0.204597701149425	6.98697e+07	0.633928571428572	9.3546e+07
18	1	167168003	169170014	906295	0.452692091755694	0.348008385744235	3.686e+07	0.492141453831042	3.48065e+07	0.65210843373494	1.46655e+07	0.461538461538462	3.69747e+07	0.0501043841336117	151634	0.142137096774194	1.59133e+07	0.215909090909091	1.45108e+07	0.177839851024209	5.00466e+07	0.558139534883721	9.66445e+06	0.0771971496437055	1.03342e+07	0.347394540942928	1.92847e+07	0.163522012578616	0	0.0387840670859539	3.25795e+06	0.0649171270718232	1.01432e+07	0.246753246753247	250885	0.25	509902	0.0629496402877698	1.42906e+07	0.298283261802575	9.72273e+06	0.705633802816901	1.18119e+07	0.338150289017341	2.1022e+07	0.203448275862069	2.70883e+07	0.625	3.34798e+07
16	1	169170015	171172026	741146	0.370200578218313	0.345911949685535	7.272e+07	0.490176817288802	7.94927e+07	0.650602409638554	2.35963e+07	0.448717948717949	4.90675e+07	0.0501043841336117	905331	0.143145161290323	3.66779e+07	0.213068181818182	1.97905e+07	0.179702048417132	1.36411e+08	0.555555555555556	1.67447e+07	0.077790973871734	1.80478e+07	0.336228287841192	5.51544e+07	0.163522012578616	3.00377e+06	0.0335429769392034	7.48196e+06	0.0662983425414364	9.79139e+06	0.246753246753247	9.76795e+06	0.256944444444444	76995.4	0.0611510791366906	1.40589e+07	0.321888412017167	2.46834e+07	0.698591549295775	1.31216e+07	0.343930635838151	5.70536e+07	0.197701149425287	7.23078e+07	0.625	7.23471e+07
14	1	171172027	173174038	912299	0.455691074778772	0.340670859538784	2.75807e+07	0.490176817288802	3.51598e+07	0.65110441767068306	1.15236e+09	0.452380952380952	2.24869e+07	0.0501043841336117	1.70513e+06	0.14616935483871	1.69199e+07	0.210227272727273	1.02251e+07	0.180633147113594	6.70696e+07	0.554263565891473	1.34717e+07	0.0783847980997625	8.17229e+06	0.328784119106699	1.88089e+07	0.163522012578616	1.11625e+06	0.0335429769392034	4.88624e+06	0.069060773480663	6.0546e+08	0.246753246753247	0	0.256944444444444	0	0.0611510791366906	1.17414e+07	0.317596566523605	1.17489e+07	0.70281690140845	1.18545e+07	0.335260115606936	2.5513e+07	0.202298850574713	3.10358e+07	0.642857142857143	3.61311e+07
15	1	173174039	175176050	1174395	0.58660737298278	0.338574423480084	4.23433e+07	0.487229862475442	3.85162e+06	0.646586345381526	8.18429e+06	0.450549450549451	3.49096e+07	0.0501043841336117	767405	0.147177419354839	2.01985e+07	0.213068181818182	1.54851e+07	0.17877094972067	6.39191e+07	0.540051679586564	6.1745e+06	0.0783847980997625	1.03772e+07	0.317617866004963	2.58493e+07	0.160377358490566	483019	0.0335429769392034	5.37099e+06	0.0662983425414365	3.97022e+06	0.246753246753247	2.62538e+06	0.256944444444444	4.04849e+06	0.0593525179856115	1.12049e+07	0.281115879828327	8.29281e+06	0.691549295774648	1.39607e+06	0.355491329479769	3.60994e+06	0.194252873563218	3.94483e+06	0.607142857142857	4.81745e+07
3	1	175176051	177178062	669883	0.334604887483192	0.334381551362683	1.8007e+08	0.480353634577603	1.81069e+08	0.649096385542169	2.68785e+07	0.450549450549451	4.54076e+07	0.0501043841336117	4.51695e+06	0.141129032258065	5.68495e+07	0.215909090909091	4.82578e+07	0.177839851024209	1.51232e+08	0.532299741602067	3.04289e+07	0.076603325415677	1.4991e+06	0.311414392059554	4.06493e+07	0.157232704402516	681983	0.039832285115304	8.75717e+06	0.0662983425414365	2.55667e+07	0.246753246753247	1.24281e+07	0.256944444444444	5.60582e+06	0.0611510791366906	9.98418e+06	0.274678111587983	3.55041e+07	0.687323943661972	2.30742e+07	0.346820809248555	5.73192e+07	0.198850574712644	8.60821e+07	0.607142857142857	7.70318e+07
9	1	177178063	179180074	724976	0.362123703554225	0.332285115303983	7.33613e+07	0.482318271119843	4.73523e+07	0.646586345381526	1.66776e+07	0.443223443223444	4.02227e+07	0.0501043841336117	1.15388e+06	0.141129032258065	2.48801e+07	0.224431818181818	2.71754e+07	0.177839851024209	7.27985e+07	0.53875968992248	1.87656e+06	0.076603325415677	1.18934e+07	0.294044665012407	3.15877e+07	0.157232704402516	700023	0.0387840670859539	5.71814e+06	0.0676795580110497	1.1874e+07	0.253246753246753	1.56255e+06	0.260416666666667	6.08585e+06	0.0611510791366906	7.61412e+06	0.251072961373391	1.07999e+07	0.684507042253521	9.02527e+06	0.332369942196531	3.80041e+07	0.193103448275862	3.65645e+07	0.607142857142857	3.29469e+07
17	1	179180075	181182086	1201488	0.600140258899547	0.336477987421384	3.5921e+06	0.475442043222004	3.30806e+07	0.652610441767068	1.28254e+07	0.448717948717949	2.98359e+07	0.0501043841336117	2.02756e+06	0.141129032258065	1.98895e+07	0.227272727272727	2.16487e+07	0.175046554934823	5.36386e+07	0.546511627906977	890736	0.0783847980997625	1.13792e+07	0.287841191066997	3.68881e+07	0.157232704402516	0	0.0387840670859539	6.6866e+06	0.0635359116022099	5.12208e+06	0.233766233766234	5.99492e+06	0.263888888888889	798165	0.0611510791366906	1.04516e+07	0.246781115879829	889286	0.676056338028169	1.0549e+07	0.323699421965318	1.94714e+07	0.190804597701149	3.3858e+07	0.607142857142857	1.69211e+07
12	1	181182087	183184098	643667	0.321510060878756	0.336477987421383	5.81092e+07	0.470530451866405	6.72548e+07	0.653614457831325	1.92506e+07	0.443223443223443	5.04877e+07	0.0501043841336117	102995	0.142137096774194	2.39888e+07	0.227272727272727	2.85441e+07	0.177839851024209	1.04226e+08	0.537467700258398	1.73125e+07	0.0783847980997625	1.32016e+07	0.280397022332506	3.14148e+07	0.157232704402516	1.22373e+06	0.0387840670859539	1.07455e+06	0.0635359116022099	9.91332e+06	0.246753246753247	0	0.263888888888889	4.37511e+06	0.0593525179856115	1.34894e+07	0.242489270386266	2.14761e+07	0.683098591549296	2.59568e+07	0.332369942196531	4.06716e+06	0.187356321839081	7.04843e+07	0.5625	6.0656e+06
13	1	183184099	185186110	830255	0.414710301436754	0.333333333333333	4.03785e+06	0.470530451866405	2.74871e+07	0.658132530120481	1.35989e+07	0.437728937728938	5.4621e+07	0.0501043841336117	2.18658e+06	0.143145161290323	1.69166e+07	0.227272727272727	1.25481e+07	0.177839851024209	7.07505e+07	0.511627906976744	1.30262e+07	0.077790973871734	1.35578e+07	0.279156327543424	3.33418e+07	0.154088050314465	1.53244e+06	0.0377358490566038	4.93608e+06	0.0635359116022099	1.06723e+07	0.240259740259741	1.08347e+07	0.260416666666667	2.4197e+06	0.0611510791366906	9.22678e+06	0.229613733905579	1.11296e+07	0.673239436619718	9.98034e+06	0.338150289017341	1.98148e+07	0.183908045977011	3.70364e+07	0.544642857142858	2.09596e+07
8	1	185186111	187188122	763916	0.381574136418762	0.325995807127883	6.93863e+07	0.468565815324165	6.76565e+07	0.654618473895582	2.38665e+07	0.434065934065934	5.27402e+06	0.0501043841336117	2.4067e+06	0.141129032258065	2.87973e+07	0.221590909090909	3.05563e+07	0.177839851024209	1.18565e+08	0.514211886304909	1.89852e+06	0.0748218527315914	2.39809e+07	0.265508684863524	5.72976e+07	0.150943396226415	5.7535e+06	0.0356394129979036	1.69658e+07	0.0635359116022099	2.04876e+07	0.253246753246753	9.64083e+06	0.260416666666667	383966	0.0575539568345324	1.40538e+07	0.210300429184549	1.10735e+07	0.673239436619718	1.82738e+07	0.335260115606936	3.65684e+07	0.185057471264368	8.57207e+07	0.526785714285715	5.97293e+07
8	1	192193153	193194158	200354	0.200152646437684	0.306079664570231	8.24087e+07	0.469548133595285	6.42802e+07	0.662650602409639	3.21517e+06	0.424908424908425	6.76222e+07	0.0501043841336117	329088	0.143145161290323	2.38242e+07	0.210227272727273	3.72475e+07	0.173184357541899	1.18274e+07	0.467700258397933	2.10154e+07	0.0760095011876485	1.23159e+07	0.245657568238213	4.20309e+07	0.150943396226415	0	0.0356394129979036	1.1191e+07	0.0662983425414365	1.07172e+07	0.25974025974026	9.07485e+06	0.256944444444444	0	0.0575539568345324	1.85622e+07	0.180257510729614	3.15897e+06	0.687323943661972	9.1581e+06	0.323699421965318	932928	0.163218390804598	6.74862e+07	0.535714285714286	6.51022e+07
10	1	196197177	197198182	713614	0.712896825793252	0.306079664570231	7.8092e+07	0.471512770137525	8.96629e+07	0.657630522088353	1.90302e+07	0.421245421245421	4.67106e+06	0.0459290187891441	122654	0.149193548387097	3.94121e+07	0.204545454545455	2.30067e+07	0.176908752327747	1.09395e+08	0.472868217054264	1.28077e+07	0.0748218527315914	1.94476e+07	0.220843672456576	4.39438e+07	0.150943396226415	0	0.0440251572327044	1.09478e+07	0.0662983425414365	1.46599e+07	0.272727272727273	5.00471e+06	0.25	2.59503e+06	0.0575539568345324	9.84397e+06	0.163090128755365	1.22615e+07	0.684507042253521	1.29752e+07	0.317919075144509	3.96599e+06	0.163218390804598	7.20452e+07	0.535714285714286	6.09269e+07
6	1	197198183	199200194	551851	0.2756481979129	0.29874213836478	8.64817e+07	0.470530451866405	7.78849e+07	0.659638554216867	1.59248e+07	0.424908424908425	6.48777e+07	0.0480167014613779	1.54216e+06	0.149193548387097	4.59901e+07	0.204545454545455	1.82445e+07	0.173184357541899	1.21125e+08	0.468992248062015	1.38044e+07	0.0742280285035629	1.7151e+07	0.212158808933002	5.77645e+06	0.150943396226415	3.80823e+06	0.0419287211740042	1.2798e+07	0.0662983425414365	1.30844e+07	0.272727272727273	1.99455e+06	0.253472222222222	3.10263e+06	0.0575539568345324	9.77739e+06	0.163090128755365	1.49228e+07	0.687323943661972	2.34003e+07	0.317919075144508	3.30726e+06	0.165517241379311	6.63146e+07	0.535714285714286	5.62938e+06
10	1	199200195	201202206	531357	0.265411496034988	0.306079664570231	5.41203e+07	0.474459724950884	5.67099e+07	0.663654618473896	1.63601e+07	0.421245421245422	6.85582e+07	0.0480167014613779	2.27846e+06	0.149193548387097	2.9509e+07	0.201704545454545	2.30884e+07	0.175977653631285	8.65745e+07	0.463824289405684	2.66761e+07	0.0736342042755344	1.73895e+07	0.204714640198511	5.15707e+07	0.150943396226415	1.03073e+06	0.0366876310272537	7.8743e+06	0.0676795580110497	1.57308e+07	0.272727272727273	8.41944e+06	0.256944444444444	245042	0.0575539568345324	1.12699e+07	0.160944206008584	1.64395e+06	0.685915492957746	2.29959e+07	0.320809248554913	4.25183e+07	0.166666666666667	6.55039e+07	0.553571428571429	2.61461e+06
33	1	201202207	203204218	1033403	0.51618222068599	0.30922431865828	4.9371e+07	0.476424361493124	5.11779e+07	0.674196787148595	2.28766e+07	0.417582417582418	7.59212e+07	0.0480167014613779	3.19551e+06	0.14616935483871	2.96152e+07	0.201704545454545	2.82973e+07	0.175977653631285	9.49714e+07	0.463824289405685	2.4758e+07	0.0831353919239905	1.80082e+07	0.184863523573201	7.13055e+07	0.154088050314465	2.42327e+06	0.0377358490566038	9.09872e+06	0.069060773480663	1.38321e+07	0.272727272727273	0	0.25	1.81148e+06	0.0575539568345324	1.09557e+07	0.152360515021459	1.62658e+07	0.683098591549296	1.4779e+07	0.332369942196531	3.12462e+07	0.170114942528736	7.97481e+07	0.571428571428572	3.44382e+07
26	1	203204219	205206230	519498	0.259487955117153	0.315513626834381	7.50431e+07	0.475442043222004	1.11513e+08	0.681224899598393	2.97446e+07	0.426739926739927	1.43145e+08	0.0480167014613779	4.77353e+06	0.149193548387097	4.53243e+07	0.198863636363636	5.17241e+07	0.179702048417132	1.77636e+08	0.471576227390181	3.99503e+07	0.110451306413302	2.58527e+07	0.194789081885856	1.00414e+08	0.154088050314465	1.02126e+07	0.0440251572327044	1.56974e+07	0.0718232044198895	2.24098e+07	0.279220779220779	1.15646e+07	0.246527777777778	900782	0.0557553956834533	4.07428e+06	0.137339055793991	2.82783e+07	0.683098591549296	2.32664e+07	0.329479768786127	8.71172e+07	0.171264367816092	1.21878e+08	0.571428571428571	6.8999e+07
26	1	205206231	207208242	512929	0.25620675600346	0.310272536687631	7.15215e+07	0.469548133595285	6.66552e+07	0.672690763052209	3.92534e+07	0.426739926739927	1.09014e+08	0.0480167014613779	6.08221e+06	0.149193548387097	4.8622e+06	0.198863636363636	4.91412e+07	0.17877094972067	1.84378e+08	0.432816537467701	4.14525e+07	0.0748218527315914	3.23511e+06	0.192307692307692	9.02834e+06	0.154088050314465	6.64496e+06	0.0450733752620545	1.78368e+07	0.069060773480663	2.32133e+07	0.266233766233766	1.4113e+07	0.239583333333333	3.71256e+06	0.0575539568345324	2.69094e+06	0.126609442060086	2.28158e+07	0.678873239436619	3.16674e+07	0.332369942196532	5.45616e+07	0.162068965517241	1.04535e+08	0.598214285714285	5.11708e+07
12	1	207208243	209210254	614384	0.306883275424922	0.313417190775682	5.04836e+07	0.463654223968565	3.86596e+07	0.668172690763053	1.5798e+07	0.417582417582418	4.61125e+07	0.0480167014613779	1.87042e+06	0.148185483870968	2.74011e+07	0.193181818181818	3.17836e+07	0.173184357541899	7.27115e+07	0.419896640826874	1.14058e+06	0.0712589073634204	1.69246e+07	0.189826302729528	4.23543e+07	0.160377358490566	2.21531e+06	0.039832285115304	7.45522e+06	0.0718232044198895	8.88898e+06	0.25974025974026	8.2602e+06	0.225694444444444	1.07077e+06	0.0593525179856115	1.74561e+07	0.120171673819742	690717	0.680281690140845	1.48651e+06	0.341040462427745	3.77954e+07	0.16551724137931	4.72395e+07	0.589285714285714	3.88036e+07
12	1	209210255	211212266	1027572	0.513269650731365	0.312368972746331	4.22387e+07	0.460707269155206	4.56705e+07	0.66214859437751	7.2602e+06	0.413919413919414	3.94619e+07	0.0480167014613779	1.13687e+06	0.148185483870968	1.755e+07	0.193181818181818	2.66831e+07	0.173184357541899	6.63948e+07	0.409560723514212	2.12375e+07	0.0712589073634204	1.42541e+07	0.19727047146402	3.63857e+07	0.154088050314465	0	0.0408805031446541	7.21452e+06	0.0718232044198895	2.18612e+06	0.272727272727273	5.35189e+06	0.222222222222222	4.22755e+06	0.0575539568345324	1.81522e+07	0.120171673819743	1.1499e+07	0.673239436619719	1.43105e+07	0.329479768786127	1.40044e+06	0.170114942528735	5.65403e+07	0.589285714285714	7.53455e+06
20	1	211212267	213214278	703973	0.351632757446009	0.316561844863732	3.67535e+07	0.457760314341846	3.07982e+07	0.65863453815261	1.20969e+07	0.417582417582418	4.28663e+07	0.0480167014613779	623624	0.145161290322581	1.83438e+07	0.193181818181818	2.1923e+07	0.176908752327746	7.17721e+07	0.404392764857882	1.15733e+07	0.0688836104513064	100801	0.196029776674938	3.29707e+07	0.144654088050314	1.16328e+06	0.0366876310272537	4.90878e+06	0.0718232044198895	9.81996e+06	0.253246753246753	246069	0.222222222222222	0	0.0575539568345324	1.00167e+07	0.109442060085837	7.33865e+06	0.673239436619719	2.27471e+07	0.335260115606936	1.58641e+06	0.175862068965517	4.65952e+07	0.589285714285714	3.81102e+07
5	1	213214279	215216290	472982	0.236253329150874	0.317610062893082	5.10764e+07	0.453831041257368	5.23866e+07	0.65863453815261	1.67928e+07	0.419413919413919	5.01839e+07	0.0480167014613779	1.03222e+06	0.14616935483871	2.86264e+07	0.198863636363636	2.27978e+07	0.175977653631285	9.05183e+07	0.414728682170542	1.99371e+07	0.0665083135391924	1.67314e+07	0.200992555831266	4.83978e+07	0.150943396226415	5.271e+06	0.0419287211740042	6.39886e+06	0.0718232044198895	1.45533e+07	0.25974025974026	1.22706e+07	0.21875	3.93984e+06	0.0575539568345324	1.85066e+07	0.105150214592275	1.13083e+07	0.670422535211268	1.26079e+07	0.326589595375723	2.62366e+07	0.17816091954023	7.01237e+07	0.607142857142857	2.13241e+07
4	1	215216291	217218302	622410	0.310892242404141	0.320754716981132	1.3431e+08	0.446954813359529	1.38755e+08	0.656124497991967	2.13686e+07	0.423076923076923	7.13565e+07	0.0480167014613779	2.66698e+06	0.144153225806452	4.64783e+07	0.198863636363636	3.33032e+07	0.174115456238361	1.11397e+08	0.419896640826874	2.23573e+07	0.0676959619952494	2.0323e+07	0.209677419354839	4.50712e+07	0.150943396226415	3.9068e+06	0.0408805031446541	1.28864e+07	0.069060773480663	1.03112e+07	0.279220779220779	6.73881e+06	0.222222222222222	2.26088e+06	0.0575539568345324	1.05552e+07	0.103004291845494	2.46089e+07	0.669014084507042	2.37367e+07	0.343930635838151	4.07665e+07	0.173563218390805	6.47412e+07	0.607142857142857	8.04286e+07
4	1	217218303	219220314	571739	0.285582204302471	0.325995807127883	1.72746e+07	0.448919449901768	1.6547e+07	0.660642570281124	4.76752e+06	0.424908424908425	2.36454e+07	0.0490605427974948	780776	0.144153225806452	7.55829e+06	0.198863636363636	7.85075e+06	0.172253258845438	4.07015e+06	0.430232558139535	3.89108e+06	0.0682897862232779	5.58902e+06	0.213399503722084	1.22624e+07	0.144654088050314	0	0.0387840670859539	812863	0.0704419889502763	4.43851e+06	0.266233766233766	8.42789e+06	0.229166666666666	0	0.0611510791366906	1.48348e+06	0.105150214592275	682287	0.671830985915493	9.60653e+06	0.358381502890173	1.12631e+07	0.172413793103448	2.28268e+07	0.607142857142857	6.10146e+06
8	1	219220315	221222326	390859	0.195233095505921	0.327044025157233	1.1081e+07	0.444990176817288	1.71765e+07	0.658132530120481	2.80041e+07	0.428571428571428	1.03682e+08	0.0480167014613779	8.40634e+06	0.150201612903226	4.51728e+07	0.198863636363636	4.73246e+07	0.171322160148976	1.53032e+08	0.448320413436692	1.25882e+07	0.0671021377672209	2.79502e+07	0.214640198511167	5.66996e+07	0.144654088050314	233407	0.0387840670859539	2.33405e+07	0.069060773480663	8.60549e+06	0.25974025974026	0	0.222222222222222	1.04696e+07	0.0611510791366906	2.02609e+07	0.100858369098713	1.83033e+07	0.670422535211267	4.1815e+07	0.358381502890173	5.19124e+07	0.175862068965517	1.30155e+08	0.616071428571428	7.73928e+06
7	1	222223333	223224338	228959	0.22872889872788	0.324947589098532	9.18029e+07	0.442043222003929	9.37047e+07	0.66566265060241	3.2963e+07	0.424908424908425	6.23942e+07	0.0480167014613779	4.78903e+06	0.151209677419355	3.24689e+07	0.204545454545455	3.88231e+07	0.175046554934823	1.46273e+08	0.457364341085271	2.13632e+07	0.0700712589073634	2.95421e+07	0.223325062034739	6.97602e+07	0.138364779874214	0	0.039832285115304	8.06946e+06	0.069060773480663	1.77434e+06	0.25974025974026	7.79928e+06	0.222222222222222	8.24074e+06	0.0611510791366906	7.27932e+06	0.103004291845494	5.70927e+06	0.664788732394366	1.94982e+07	0.358381502890173	2.07981e+07	0.181609195402299	1.03871e+08	0.607142857142857	6.8962e+07
11	1	223224339	225226350	574973	0.287197579235289	0.325995807127883	3.47107e+07	0.442043222003929	2.92329e+07	0.66917670682731	2.17498e+06	0.421245421245421	4.34859e+07	0.0480167014613779	142487	0.151209677419355	1.7013e+07	0.204545454545455	2.52168e+07	0.171322160148975	7.83673e+07	0.481912144702842	1.60325e+07	0.0688836104513064	1.20988e+07	0.220843672456576	4.5554e+07	0.138364779874214	0	0.0377358490566038	7.29139e+06	0.069060773480663	1.28557e+07	0.25974025974026	1.72329e+07	0.222222222222222	0	0.0611510791366906	1.52763e+07	0.100858369098713	2.09084e+07	0.649295774647888	1.25863e+07	0.355491329479768	2.02278e+07	0.181609195402299	5.31363e+06	0.616071428571428	6.54549e+07
16	1	225226351	227228362	586182	0.292796446774545	0.325995807127883	3.68206e+07	0.44007858546169	3.56819e+07	0.660642570281124	2.36223e+07	0.419413919413919	7.93779e+07	0.0480167014613779	1.70016e+06	0.151209677419355	2.12338e+07	0.204545454545455	326190	0.169459962756052	1.17212e+08	0.496124031007752	2.76043e+07	0.0712589073634204	1.69338e+07	0.218362282878412	4.48053e+07	0.132075471698113	395637	0.0345911949685535	7.48636e+06	0.069060773480663	1.56145e+07	0.25974025974026	1.58239e+07	0.21875	8.30855e+06	0.0611510791366906	2.68262e+07	0.0987124463519313	2.05499e+07	0.647887323943662	3.02395e+07	0.352601156069364	5.01013e+07	0.182758620689655	7.35007e+07	0.616071428571428	5.14539e+07
16	1	227228363	229230374	479429	0.239473589568894	0.324947589098532	2.88382e+08	0.43811394891945	3.17177e+08	0.662148594377511	7.80153e+07	0.419413919413919	4.2646e+08	0.0480167014613779	1.51918e+07	0.153225806451613	1.61665e+08	0.204545454545455	2.46414e+08	0.167597765363128	6.61412e+06	0.487080103359173	9.92999e+07	0.0706650831353919	1.52271e+08	0.223325062034739	3.09793e+08	0.132075471698113	2.55113e+07	0.0335429769392034	7.50392e+07	0.069060773480663	4.34324e+07	0.25974025974026	2.18423e+06	0.222222222222222	1.47823e+07	0.0611510791366906	1.14039e+08	0.0987124463519313	1.27981e+08	0.650704225352113	1.42565e+08	0.346820809248555	2.5309e+08	0.182758620689655	5.16291e+08	0.616071428571428	1.36885e+08
16	1	229230375	231232386	673024	0.336173809147997	0.325995807127882	669872	0.43516699410609	4.68936e+07	0.65863453815261	1.25232e+07	0.419413919413919	5.01638e+07	0.0480167014613779	1.67863e+06	0.153225806451613	2.10891e+07	0.204545454545455	2.49222e+07	0.166666666666667	9.231e+07	0.501291989664083	2.29404e+07	0.0706650831353919	1.56365e+07	0.222084367245657	3.64189e+07	0.132075471698113	2.80017e+06	0.0387840670859539	1.05832e+07	0.0704419889502763	1.25774e+07	0.240259740259741	2.05012e+06	0.229166666666667	0	0.0611510791366906	1.9199e+07	0.0987124463519315	1.63325e+07	0.649295774647887	1.49732e+06	0.338150289017341	4.01421e+07	0.182758620689655	6.99426e+06	0.625	8.05743e+07
10	1	231232387	233234398	597672	0.298535673112849	0.323899371069183	5.22679e+07	0.432220039292731	7.54166e+07	0.659638554216867	2.65632e+07	0.423076923076923	6.65418e+07	0.0480167014613779	4.98385e+06	0.15625	2.97787e+07	0.201704545454545	3.75467e+07	0.161080074487896	1.18822e+08	0.510335917312661	2.34973e+07	0.0712589073634204	2.14213e+07	0.222084367245657	5.37274e+07	0.135220125786163	3.74686e+06	0.0429769392033543	1.12014e+07	0.0704419889502763	1.47838e+07	0.25974025974026	1.03302e+07	0.232638888888889	1.03912e+06	0.0611510791366906	1.72366e+07	0.0944206008583691	1.43415e+07	0.652112676056338	2.07744e+07	0.338150289017341	5.17536e+07	0.182758620689655	9.2547e+07	0.625	2.41059e+07
6	1	233234399	235236410	575510	0.287465809395748	0.328092243186583	2.89555e+07	0.431237721021611	2.07113e+07	0.65863453815261	1.14017e+07	0.421245421245422	3.20776e+07	0.0480167014613779	1.54818e+06	0.159274193548387	1.63059e+07	0.207386363636364	3.06677e+07	0.161080074487895	5.68051e+06	0.537467700258398	5.45543e+06	0.0688836104513064	8.40263e+06	0.229528535980149	3.61878e+07	0.132075471698113	0	0.0429769392033543	51845.5	0.0718232044198895	8.00493e+06	0.25974025974026	0	0.243055555555556	1.89009e+06	0.0593525179856115	483966	0.092274678111588	7.93063e+06	0.657746478873239	1.51171e+07	0.329479768786127	1.63936e+07	0.193103448275862	3.96025e+07	0.633928571428572	3.13357e+07
16	1	235236411	237238422	1060750	0.529841978969157	0.327044025157233	4.06786e+07	0.430255402750492	5.74126e+07	0.658132530120481	1.33338e+06	0.423076923076923	4.7836e+07	0.0480167014613779	2.73238e+06	0.157258064516129	2.29931e+07	0.207386363636364	3.27402e+07	0.166666666666667	8.35954e+07	0.541343669250646	1.09039e+07	0.0682897862232779	1.44498e+07	0.224565756823822	3.77659e+07	0.132075471698113	1.3087e+06	0.039832285115304	6.50833e+06	0.0704419889502763	9.32683e+06	0.266233766233766	5.75626e+06	0.243055555555556	3.3511e+06	0.0611510791366906	9.19999e+06	0.0987124463519313	1.05688e+07	0.652112676056338	1.84113e+06	0.341040462427746	3.88235e+07	0.201149425287356	7.23407e+07	0.642857142857143	3.05257e+09
2	1	237238423	238239428	765738	0.764968441747602	0.324947589098532	1.03632e+08	0.432220039292731	1.3012e+08	0.660642570281124	1.1947e+07	0.428571428571429	3.58491e+07	0.0480167014613779	1.14555e+06	0.157258064516129	2.36581e+07	0.198863636363636	1.74124e+07	0.165735567970205	7.98412e+07	0.527131782945736	1.46917e+07	0.0688836104513064	1.57822e+07	0.223325062034739	3.91339e+07	0.125786163522013	0	0.0377358490566038	8.08718e+06	0.0718232044198895	8.2393e+06	0.272727272727273	4.92804e+06	0.243055555555556	0	0.0611510791366906	7.58631e+06	0.0987124463519313	1.2108e+07	0.645070422535211	2.03382e+07	0.335260115606936	2.75563e+07	0.197701149425287	4.18666e+07	0.625	7.56065e+07
10	1	240241441	242243452	1133591	0.566225876767972	0.323899371069183	4.73653e+07	0.44007858546169	3.96649e+06	0.65110441767068306	3.99421e+06	0.426739926739927	2.99999e+07	0.0480167014613779	489446	0.154233870967742	2.06205e+07	0.196022727272727	1.63993e+07	0.173184357541899	4.99743e+07	0.520671834625323	7.71373e+06	0.0742280285035629	6.07869e+06	0.219602977667494	1.90143e+07	0.125786163522013	899949	0.0419287211740042	4.15977e+06	0.0718232044198895	3.26259e+06	0.25974025974026	2.80521e+06	0.25	1.07302e+06	0.0611510791366906	2.90862e+06	0.109442060085837	6.27645e+06	0.649295774647887	9.74279e+06	0.343930635838151	3.01926e+07	0.197701149425287	3.14755e+07	0.625	2.6871e+07
4	1	242243453	244245464	1120295	0.559584557934718	0.325995807127883	1.50122e+07	0.44204322200393	1.10436e+07	0.659136546184738	4.49234e+06	0.43040293040293	1.83009e+07	0.0480167014613779	891875	0.161290322580645	8.6146e+06	0.198863636363636	6.65022e+06	0.173184357541899	2.61234e+07	0.518087855297158	1.95518e+06	0.0807600950118765	294652	0.21712158808933	1.17156e+07	0.125786163522013	0	0.0440251572327044	1.81156e+06	0.0718232044198895	2.57172e+06	0.253246753246753	1.30178e+06	0.256944444444444	694285	0.0611510791366906	3.67755e+06	0.122317596566523	2.44516e+06	0.650704225352113	6.81909e+06	0.358381502890174	1.10719e+07	0.197701149425287	1.58025e+07	0.651785714285715	1.21153e+07
8	1	244245465	246247476	1092902	0.545901822766297	0.325995807127883	1.91217e+07	0.441060903732809	1.6202e+07	0.658132530120481	1.07076e+07	0.432234432234432	3.56727e+07	0.0480167014613779	1.1836e+06	0.161290322580645	9.09267e+06	0.196022727272727	1.43442e+07	0.172253258845438	5.43612e+07	0.521963824289406	6.55776e+06	0.0760095011876484	6.7206e+06	0.219602977667494	2.28164e+07	0.122641509433963	1.94874e+06	0.0387840670859539	1.45104e+06	0.0718232044198895	5.48112e+06	0.25974025974026	0	0.260416666666667	4.60274e+06	0.0593525179856115	7.18203e+06	0.128755364806867	3.15874e+06	0.656338028169014	8.96521e+06	0.361271676300578	2.44781e+07	0.193103448275862	3.41286e+07	0.625	1.6112e+07
28	1	246247477	248249488	702394	0.35084405088481	0.176100628930818	5.48302e+08	0.229862475442043	6.06273e+08	0.34789156626506	6.43746e+07	0.245421245421245	1.07751e+08	0.0250521920668059	5.55616e+06	0.0927419354838708	1.44509e+08	0.102272727272727	1.43208e+08	0.0931098696461826	2.55713e+08	0.27906976744186	6.14105e+07	0.0427553444180522	7.752e+07	0.116625310173697	1.66413e+08	0.0628930817610063	1.09248e+07	0.0209643605870021	2.33893e+07	0.0386740331491713	4.78074e+07	0.142857142857143	9.76465e+06	0.135416666666666	841553	0.0305755395683453	2.8525e+06	0.070815450643777	5.15331e+07	0.356338028169014	1.08682e+08	0.202312138728324	1.48328e+08	0.104597701149425	2.61136e+08	0.348214285714286	1.07887e+08
5	2	1	1000820	124197	0.124095241901641	0.291404612159329	4.41546e+07	0.110019646365422	2.24178e+07	0.0873493975903614	7.80773e+06	0.208791208791209	1.91708e+07	0	3.40453e+06	0.0846774193548387	7.48998e+06	0.0284090909090909	1.0257e+07	0.0931098696461825	6.94991e+07	0.364341085271318	2.04358e+06	0.0273159144893112	8.0719e+06	0.240694789081886	3.60939e+07	0.0440251572327044	0	0.0188679245283019	1.03893e+07	0.074585635359116	1.47738e+07	0.0779220779220779	0	0.180555555555556	7.0015e+06	0.133093525179856	2.07341e+06	0.0686695278969957	1.54841e+07	0.135211267605634	2.17614e+07	0.184971098265896	6.39026e+06	0.071264367816092	5.46592e+07	0.410714285714286	2.77646e+07
4	2	1000821	2001640	796654	0.79600127895126	0.29769392033543	3.20922e+07	0.113948919449902	3.83305e+07	0.0873493975903614	6.85513e+06	0.205128205128205	2.91504e+07	0	1.06152e+06	0.0846774193548387	1.75151e+07	0.0284090909090909	2.07876e+07	0.0912476722532588	5.61698e+07	0.374677002583979	8.45505e+06	0.0273159144893112	6.13468e+06	0.24317617866005	2.59859e+07	0.0440251572327044	3.48681e+06	0.0209643605870021	4.05792e+06	0.074585635359116	5.37416e+06	0.0779220779220779	1.84596e+06	0.180555555555556	0	0.129496402877698	4.29145e+06	0.0772532188841202	9.14421e+06	0.138028169014085	2.55305e+07	0.184971098265896	4.08454e+07	0.071264367816092	5.66993e+07	0.428571428571429	2.68982e+07
6	2	3002461	4003280	201296	0.201131072520533	0.29769392033543	5.48394e+07	0.111984282907662	6.12311e+07	0.0873493975903614	9.07639e+06	0.205128205128205	5.88603e+07	0	1.05028e+06	0.0846774193548387	2.31061e+07	0.0227272727272727	2.81197e+07	0.0875232774674116	7.57098e+06	0.361757105943152	1.02429e+07	0.0261282660332542	1.66829e+07	0.240694789081886	3.78172e+06	0.0566037735849057	3.47399e+06	0.0209643605870021	7.51073e+06	0.074585635359116	1.67113e+07	0.0649350649350649	1.43994e+07	0.180555555555556	0	0.129496402877698	1.6984e+06	0.0772532188841202	1.93551e+07	0.140845070422535	2.02768e+07	0.184971098265896	3.94271e+07	0.0735632183908046	7.02256e+07	0.392857142857143	6.62374e+07
3	2	7005741	8006560	61062	0.0610119701844488	0.29979035639413	1.11299e+08	0.117878192534381	4.58092e+07	0.0853413654618474	9.96156e+06	0.201465201465201	3.08996e+07	0	6.92465e+06	0.0826612903225806	3.41975e+07	0.0227272727272727	2.08622e+07	0.0875232774674116	7.50603e+07	0.364341085271318	1.65422e+07	0.0249406175771971	1.62549e+07	0.24317617866005	3.95302e+07	0.0440251572327044	0	0.0209643605870021	1.76855e+07	0.0773480662983425	1.50707e+07	0.0779220779220779	0	0.194444444444444	0	0.129496402877698	1.39973e+07	0.0772532188841202	3.19029e+07	0.135211267605634	1.65422e+07	0.184971098265896	1.26952e+07	0.0758620689655172	7.26907e+07	0.410714285714286	5.64717e+06
3	2	8006561	9007380	105681	0.105594412581683	0.29979035639413	5.17239e+07	0.115913555992141	5.94153e+07	0.0873493975903614	1.85084e+07	0.201465201465201	8.48049e+07	0	600155	0.0826612903225806	3.73228e+07	0.0227272727272727	4.79111e+07	0.0893854748603352	9.10611e+07	0.372093023255814	1.902e+07	0.0273159144893112	1.4088e+07	0.238213399503722	6.75888e+07	0.0440251572327044	0	0.0230607966457023	6.14444e+06	0.0773480662983425	1.74155e+06	0.0779220779220779	0	0.194444444444444	8.30038e+06	0.129496402877698	2.02189e+07	0.0729613733905579	1.83144e+07	0.135211267605634	1.90519e+07	0.184971098265896	5.86818e+07	0.0781609195402299	1.0156e+08	0.410714285714286	3.26291e+07
8	2	9007381	10008200	542583	0.542138446473891	0.30188679245283	1.42687e+07	0.121807465618861	1.07153e+07	0.0883534136546185	6.36313e+06	0.201465201465201	1.91258e+07	0	2.33789e+06	0.0826612903225806	1.10923e+07	0.0227272727272727	1.28313e+07	0.0893854748603352	2.93035e+07	0.361757105943152	7.29915e+06	0.0285035629453682	4.35002e+06	0.240694789081886	2.3116e+06	0.0440251572327044	255977	0.0230607966457023	3.98926e+06	0.074585635359116	6.21883e+06	0.0779220779220779	2.71035e+06	0.194444444444444	3.2334e+06	0.129496402877698	1.0283e+07	0.0772532188841202	2.39355e+06	0.143661971830986	9.33971e+06	0.196531791907514	1.74145e+07	0.0873563218390805	2.892e+07	0.428571428571429	6.58227e+06
10	2	10008201	11009020	369552	0.369249215643173	0.30188679245283	2.26223e+07	0.117878192534381	2.38026e+07	0.0823293172690763	1.5605e+07	0.201465201465201	4.44644e+07	0	572089	0.0806451612903226	1.82073e+07	0.0227272727272727	1.88391e+07	0.0875232774674116	5.1408e+07	0.348837209302326	7.95876e+06	0.0273159144893112	8.73981e+06	0.233250620347395	3.66912e+07	0.0440251572327044	0	0.0230607966457023	8.76667e+06	0.074585635359116	1.16208e+07	0.051948051948052	3.86568e+06	0.194444444444444	4.74733e+06	0.129496402877698	1.85024e+07	0.0772532188841202	693841	0.138028169014085	1.0056e+07	0.190751445086705	2.55683e+07	0.0850574712643678	5.23969e+07	0.428571428571429	3.73239e+07
7	2	11009021	12009840	298076	0.297831777942087	0.306079664570231	5.95215e+07	0.111984282907662	6.43077e+07	0.080321285140562207	2.29953e+07	0.197802197802198	6.30019e+07	0	2.12781e+06	0.0806451612903226	4.43681e+07	0.0227272727272727	2.76032e+07	0.0856610800744879	1.13452e+08	0.348837209302326	1.6207e+07	0.0296912114014252	1.66494e+07	0.230769230769231	6.89043e+07	0.0440251572327044	6.98927e+06	0.0188679245283019	1.23447e+07	0.074585635359116	1.74946e+07	0.0649350649350649	9.8672e+06	0.201388888888889	5.93779e+06	0.133093525179856	2.01579e+07	0.0643776824034335	1.73154e+07	0.135211267605634	3.16282e+07	0.190751445086705	4.71776e+07	0.0850574712643678	1.02066e+08	0.410714285714286	3.35485e+07
2	2	15012301	16013120	433230	0.432875042465179	0.312368972746331	2.99772e+07	0.121807465618861	2.892e+07	0.080321285140562207	6.44291e+06	0.208791208791209	2.07851e+07	0	0	0.0826612903225806	1.55311e+07	0.0227272727272727	8.76548e+06	0.0893854748603352	3.51778e+07	0.348837209302326	1.10442e+07	0.0320665083135392	4.30107e+06	0.233250620347395	1.70981e+07	0.0440251572327044	0	0.0125786163522013	5.93124e+06	0.074585635359116	2.82354e+06	0.0649350649350649	1.03354e+07	0.194444444444444	4.04955e+06	0.133093525179856	696453	0.0643776824034335	0	0.129577464788732	1.14648e+06	0.190751445086705	1.0736e+07	0.0827586206896552	2.86246e+07	0.428571428571429	769414
5	2	17013941	18014760	173958	0.173815471313523	0.310272536687631	5.3261e+07	0.117878192534381	7.03629e+07	0.0783132530120482	2.22433e+07	0.208791208791209	7.11721e+07	0	364599	0.0806451612903226	1.58216e+07	0.0227272727272727	3.66147e+07	0.0893854748603352	9.12082e+07	0.354005167958656	2.22165e+07	0.0285035629453682	1.92807e+07	0.228287841191067	6.1729e+07	0.0440251572327044	3.99202e+06	0.0125786163522013	7.43342e+06	0.074585635359116	2.11602e+07	0.0649350649350649	1.71597e+07	0.194444444444444	0	0.129496402877698	1.9653e+07	0.0600858369098712	1.49312e+06	0.132394366197183	1.71313e+07	0.208092485549133	3.16847e+06	0.0781609195402299	9.50542e+07	0.392857142857143	1.79641e+06
3	2	18014761	19015580	32531	0.0325043464359225	0.320754716981132	1.18611e+08	0.119842829076621	1.56546e+08	0.080321285140562207	5.97617e+07	0.208791208791209	1.61019e+08	0	1.29978e+07	0.0786290322580645	1.12292e+08	0.0227272727272727	7.83182e+07	0.0893854748603352	2.88788e+08	0.341085271317829	5.71905e+07	0.0261282660332542	7.61832e+07	0.220843672456576	1.32764e+08	0.0440251572327044	0	0.0125786163522013	3.31249e+07	0.074585635359116	2.83753e+07	0.0649350649350649	0	0.194444444444444	2.69648e+07	0.129496402877698	5.25469e+07	0.0600858369098712	6.02743e+07	0.126760563380282	5.07259e+07	0.213872832369942	1.96735e+08	0.0758620689655172	2.42683e+08	0.446428571428571	3.07399e+08
9	2	20016401	21017220	253895	0.253686976679123	0.312368972746331	4.3902e+07	0.115913555992141	3.16902e+07	0.0793172690763052	1.80759e+07	0.208791208791209	6.68825e+07	0	2.49808e+06	0.0806451612903226	2.78127e+07	0.0227272727272727	1.75608e+07	0.0893854748603352	1.00107e+08	0.354005167958656	2.23998e+07	0.0261282660332542	1.22015e+07	0.220843672456576	8.86845e+07	0.050314465408805	2.75429e+06	0.0167714884696017	7.62317e+06	0.0773480662983425	2.43126e+07	0.0649350649350649	1.17571e+07	0.208333333333333	0	0.129496402877698	2.69308e+07	0.0600858369098712	1.81385e+07	0.11830985915493	2.84098e+07	0.225433526011561	1.57545e+07	0.0735632183908046	9.35812e+07	0.464285714285714	4.07445e+07
2	2	23018861	24019680	189234	0.18907895525669	0.310272536687631	666809	0.117878192534381	3.66129e+06	0.0793172690763052	764019	0.205128205128205	2.49267e+07	0	0	0.0806451612903226	5.9779e+06	0.0227272727272727	6.7318e+06	0.0875232774674116	3.28227e+07	0.361757105943152	246938	0.0213776722090261	1.96205e+06	0.210918114143921	3.47662e+06	0.050314465408805	0	0.0188679245283019	1.14135e+06	0.0773480662983425	3.25198e+06	0.051948051948052	0	0.194444444444444	0	0.133093525179856	0	0.0686695278969957	3.49964e+06	0.11830985915493	1.04299e+07	0.219653179190751	1.67761e+07	0.0735632183908046	1.37259e+06	0.464285714285714	1.88731e+07
11	2	24019681	25020500	468737	0.468352950580524	0.316561844863732	323037	0.113948919449902	3.37624e+06	0.0813253012048193	1.33981e+07	0.205128205128205	4.22653e+07	0	902069	0.0786290322580645	2.54662e+07	0.0227272727272727	2.85358e+07	0.0875232774674116	7.02297e+07	0.359173126614987	1.49537e+07	0.0225653206650831	8.97715e+06	0.213399503722084	5.06945e+07	0.050314465408805	0	0.0167714884696017	6.43696e+06	0.0773480662983425	1.05029e+07	0.051948051948052	3.23241e+06	0.194444444444444	3.74279e+06	0.133093525179856	155655	0.0772532188841202	1.57499e+07	0.12112676056338	1.12654e+07	0.219653179190751	1.87739e+07	0.0781609195402299	5.0689e+07	0.464285714285714	5.33348e+07
7	2	25020501	26021320	550500	0.550048959852921	0.327044025157233	2.03777e+07	0.115913555992141	2.50556e+07	0.0793172690763052	1.44273e+06	0.205128205128205	3.94153e+07	0	3.07236e+06	0.0786290322580645	1.96825e+07	0.0227272727272727	2.66116e+07	0.0875232774674116	5.15248e+07	0.364341085271318	1.10868e+07	0.0201900237529691	8.51149e+06	0.215880893300248	4.27065e+07	0.050314465408805	1.2703e+06	0.0167714884696017	355408	0.0773480662983425	7.82505e+06	0.051948051948052	8.25696e+06	0.194444444444444	6.37379e+06	0.133093525179856	1.01351e+07	0.0729613733905579	8.47714e+06	0.12112676056338	1.55361e+07	0.225433526011561	2.01837e+07	0.0781609195402299	4.12632e+07	0.446428571428571	3.13195e+07
8	2	26021321	27022140	364809	0.364510101716592	0.327044025157233	7.79435e+07	0.117878192534381	8.14769e+07	0.0833333333333333	2.48899e+07	0.205128205128205	7.2408e+07	0	8.11337e+06	0.0786290322580645	3.51115e+07	0.0227272727272727	3.84112e+07	0.0856610800744879	1.25165e+08	0.382428940568475	2.586e+07	0.0190023752969121	2.12154e+07	0.213399503722084	6.22171e+07	0.050314465408805	3.83379e+06	0.0188679245283019	1.19441e+07	0.0773480662983425	1.42944e+07	0.051948051948052	8.18257e+06	0.194444444444444	1.20226e+06	0.133093525179856	2.58822e+07	0.0901287553648069	2.20765e+07	0.115492957746479	2.41079e+07	0.23121387283237	5.74759e+07	0.0735632183908046	9.87102e+07	0.464285714285714	2.83568e+07
36	2	27022141	28022960	475527	0.475137387342379	0.327044025157233	1.28998e+08	0.115913555992141	1.20375e+07	0.0833333333333333	5.26359e+07	0.205128205128205	1.50494e+08	0	9.78107e+06	0.0806451612903226	7.73275e+07	0.0227272727272727	7.90273e+07	0.0837988826815642	2.16797e+08	0.387596899224806	4.83773e+07	0.0201900237529691	3.78837e+07	0.205955334987593	1.39968e+08	0.0440251572327044	584147	0.0167714884696017	2.63434e+07	0.0773480662983425	3.35437e+07	0.051948051948052	3.45257e+07	0.1875	7.31454e+06	0.140287769784173	5.05425e+07	0.0944206008583691	4.53573e+07	0.112676056338028	4.81639e+07	0.213872832369942	7.67736e+07	0.0758620689655172	1.85167e+08	0.446428571428571	1.12156e+08
4	2	28022961	29023780	303104	0.302855658360145	0.331236897274633	2.74933e+07	0.113948919449902	3.46491e+07	0.0843373493975904	9.39273e+06	0.208791208791209	3.28356e+07	0	0	0.0786290322580645	1.76743e+07	0.0227272727272727	1.46167e+07	0.0837988826815642	4.35358e+07	0.37984496124031	7.49818e+06	0.0213776722090261	9.31062e+06	0.205955334987593	4.48435e+07	0.0440251572327044	227531	0.0188679245283019	2.85645e+06	0.0773480662983425	1.01202e+07	0.051948051948052	0	0.1875	0	0.136690647482014	1.69916e+07	0.0987124463519313	1.51937e+07	0.109859154929577	2.24217e+07	0.213872832369942	1.30921e+07	0.071264367816092	3.98618e+07	0.5	3.53485e+07
5	2	29023781	30024600	775104	0.774468935472912	0.333333333333333	2.40607e+07	0.113948919449902	2.42643e+07	0.0853413654618474	7.96767e+06	0.208791208791209	2.50693e+07	0	136668	0.0786290322580645	1.33065e+07	0.0227272727272727	1.22483e+07	0.0837988826815642	5.00099e+07	0.37984496124031	1.12962e+07	0.0213776722090261	554052	0.200992555831266	2.40607e+07	0.0440251572327044	177952	0.0167714884696017	4.73705e+06	0.0773480662983425	3.95751e+06	0.051948051948052	577679	0.1875	0	0.133093525179856	7.71884e+06	0.0858369098712446	1.01854e+07	0.109859154929577	1.16907e+07	0.219653179190751	1.53589e+07	0.0689655172413793	3.22537e+07	0.464285714285714	1.77952e+06
5	2	30024601	31025420	384572	0.384256909334346	0.331236897274633	1.59373e+07	0.111984282907662	1.61398e+07	0.0853413654618474	3.385e+06	0.212454212454212	1.47884e+07	0	550910	0.0786290322580645	1.51587e+06	0.0227272727272727	6.58302e+06	0.0819366852886406	1.98783e+07	0.374677002583979	8.31144e+06	0.0225653206650831	3.51391e+06	0.200992555831266	1.59373e+07	0.0440251572327044	0	0.0146750524109015	2.28597e+06	0.0773480662983425	1.59527e+06	0.051948051948052	0	0.194444444444444	0	0.136690647482014	8.92805e+06	0.0901287553648069	5.13216e+06	0.107042253521127	1.00333e+07	0.208092485549133	1.62518e+07	0.0689655172413793	2.15011e+07	0.464285714285714	8.96653e+06
4	2	31025421	32026240	368745	0.36844287684099	0.333333333333333	3.61e+07	0.113948919449902	4.68647e+07	0.0883534136546185	1.2239e+07	0.208791208791209	3.21315e+07	0	1.72367e+06	0.0766129032258065	1.7594e+07	0.0227272727272727	2.74623e+07	0.0819366852886406	6.77975e+07	0.392764857881137	1.88326e+06	0.0213776722090261	1.29772e+07	0.200992555831266	2.173e+07	0.0440251572327044	3.74055e+06	0.0146750524109015	7.16802e+06	0.0773480662983425	4.15936e+06	0.051948051948052	8.09523e+06	0.173611111111111	2.33785e+06	0.136690647482014	4.65562e+06	0.0858369098712446	1.23268e+06	0.107042253521127	1.65679e+07	0.208092485549133	3.81361e+07	0.0689655172413793	5.18555e+07	0.446428571428571	9.03967e+08
8	2	32026241	33027060	796856	0.796203113446973	0.327044025157233	3.05689e+07	0.111984282907662	2.6768e+07	0.0863453815261044	905927	0.208791208791209	2.73587e+07	0	1.59525e+06	0.0745967741935484	1.6527e+07	0.0227272727272727	7.10339e+06	0.0800744878957169	4.86448e+07	0.387596899224806	7.55283e+06	0.0213776722090261	6.93758e+06	0.196029776674938	4.49049e+07	0.0440251572327044	871480	0.0167714884696017	2.49876e+06	0.0773480662983425	8.08392e+06	0.051948051948052	5.6191e+06	0.173611111111111	6.43555e+06	0.133093525179856	1.17985e+07	0.0772532188841202	9.77869e+06	0.104225352112676	1.48822e+07	0.202312138728324	2.41333e+07	0.064367816091954	3.65483e+07	0.446428571428571	2.50986e+07
4	2	33027061	34027880	532212	0.531775943726145	0.329140461215933	3.05024e+07	0.113948919449902	3.49874e+07	0.0843373493975904	7.81036e+06	0.208791208791209	2.31529e+07	0	1.59233e+06	0.0766129032258065	1.80749e+07	0.0227272727272727	704606	0.0782122905027933	4.07624e+06	0.390180878552972	695908	0.0213776722090261	7.8482e+06	0.193548387096774	1.92097e+07	0.0440251572327044	0	0.0167714884696017	3.73301e+06	0.0801104972375691	4.04697e+06	0.051948051948052	2.8044e+06	0.173611111111111	0	0.129496402877698	5.62079e+06	0.0858369098712446	8.76844e+06	0.104225352112676	1.08401e+07	0.208092485549133	1.76152e+07	0.0620689655172414	3.80608e+07	0.464285714285714	1.29583e+07
3	2	36029521	37030340	324217	0.323951359884894	0.331236897274633	1.10514e+07	0.117878192534381	1.91443e+07	0.0883534136546185	7.3089e+06	0.201465201465201	2.88257e+07	0	0	0.0745967741935484	759013	0.0227272727272727	1.15663e+07	0.0800744878957169	3.31377e+07	0.385012919896641	9.94953e+06	0.0178147268408551	6.78709e+06	0.198511166253102	1.98351e+07	0.0440251572327044	2.14191e+06	0.0125786163522013	3.39687e+06	0.0773480662983425	0	0.038961038961039	1.34102e+07	0.173611111111111	0	0.129496402877698	1.30693e+06	0.0772532188841202	2.00283e+06	0.0985915492957746	492708	0.213872832369942	1.19549e+07	0.064367816091954	2.61655e+07	0.464285714285714	1.06357e+07
10	2	37030341	38031160	429880	0.429527787214484	0.327044025157233	3.31243e+07	0.121807465618861	4.01074e+07	0.0813253012048193	1.42311e+07	0.201465201465201	4.02199e+07	0	1.96721e+06	0.0725806451612903	1.77336e+07	0.0227272727272727	3.63474e+07	0.0782122905027933	7.57824e+07	0.377260981912145	1.15785e+07	0.0190023752969121	1.53942e+07	0.196029776674938	6.20827e+07	0.0440251572327044	3.23088e+06	0.0125786163522013	6.2171e+06	0.0773480662983425	1.43594e+07	0.038961038961039	0	0.173611111111111	8.02148e+06	0.129496402877698	1.47854e+07	0.0772532188841202	1.81265e+06	0.0985915492957746	1.93233e+06	0.208092485549133	2.66362e+07	0.0666666666666667	7.89364e+06	0.446428571428571	7.7541e+07
6	2	38031161	39031980	168416	0.168278012030135	0.327044025157233	4.9961e+07	0.113948919449902	3.38909e+07	0.0833333333333333	2.17832e+07	0.208791208791209	7.56214e+07	0	3.76597e+06	0.0786290322580645	3.2168e+07	0.0227272727272727	2.59773e+07	0.0782122905027933	1.17287e+08	0.387596899224806	5.44741e+06	0.0201900237529691	1.74424e+07	0.198511166253102	4.40537e+07	0.0440251572327044	0	0.0167714884696017	9.34017e+06	0.0773480662983425	1.64936e+09	0.038961038961039	0	0.180555555555556	5.1632e+06	0.129496402877698	3.03201e+07	0.0901287553648069	1.17191e+07	0.101408450704225	3.23527e+07	0.213872832369942	2.74047e+06	0.071264367816092	6.73345e+07	0.446428571428571	0
8	2	39031981	40032800	584154	0.58367538618333	0.335429769392034	2.06992e+07	0.115913555992141	2.3504e+07	0.0813253012048193	8.27677e+06	0.205128205128205	2.16999e+07	0	1.44768e+06	0.0826612903225806	1.19793e+07	0.0227272727272727	1.28391e+07	0.0763500931098696	5.32976e+07	0.37984496124031	706738	0.0213776722090261	5.03493e+06	0.196029776674938	2.35932e+07	0.0440251572327044	1.1888e+06	0.0125786163522013	4.98978e+06	0.0773480662983425	634029	0.038961038961039	4.96196e+06	0.180555555555556	0	0.129496402877698	6.52835e+06	0.0858369098712446	4.53477e+06	0.0985915492957746	1.09385e+07	0.219653179190751	9.28926e+06	0.071264367816092	2.4329e+07	0.446428571428571	2.85313e+07
1	2	40032801	41033620	315028	0.314769888691273	0.329140461215933	2.78268e+07	0.117878192534381	4.2857e+07	0.0843373493975904	5.24681e+06	0.212454212454212	1.49732e+07	0	1.34221e+06	0.0846774193548387	1.14648e+07	0.0284090909090909	0	0.0763500931098696	2.62341e+07	0.390180878552972	1.46959e+06	0.0225653206650831	2.72641e+06	0.188585607940447	8.06177e+06	0.0440251572327044	0	0.0146750524109015	4.25132e+06	0.0773480662983425	1.95946e+06	0.038961038961039	0	0.1875	0	0.133093525179856	8.13928e+06	0.0858369098712446	1.04418e+07	0.0957746478873239	9.12744e+06	0.208092485549133	1.6962e+07	0.071264367816092	2.45437e+07	0.464285714285714	4.37837e+06
7	2	42034441	43035260	396342	0.39601726584201	0.343815513626834	1.99847e+07	0.121807465618861	196753	0.0833333333333333	8.65907e+06	0.201465201465201	2.25063e+07	0	266710	0.0766129032258065	1.01828e+06	0.0284090909090909	1.26947e+07	0.0763500931098696	3.62692e+07	0.395348837209302	1.06111e+07	0.0213776722090261	3.0958e+06	0.196029776674938	2.18343e+07	0.0440251572327044	1.74005e+06	0.0125786163522013	2.25274e+06	0.0773480662983425	4.67236e+06	0.038961038961039	0	0.1875	2.19398e+06	0.129496402877698	1.28292e+07	0.0815450643776824	1.31925e+07	0.0957746478873239	7.23174e+06	0.213872832369942	3.88165e+07	0.0804597701149425	2.80342e+07	0.482142857142857	9.01098e+06
4	2	43035261	44036080	519171	0.518745628584561	0.339622641509434	1.96416e+07	0.1237721021611	1.99257e+07	0.0823293172690763	1.07008e+07	0.201465201465201	2.26074e+07	0	1.22166e+06	0.0766129032258065	1.42199e+07	0.0284090909090909	2.0594e+07	0.0782122905027933	4.39577e+07	0.41343669250646	7.55352e+06	0.0190023752969121	5.65821e+06	0.196029776674938	3.08678e+07	0.0440251572327044	0	0.0125786163522013	5.17087e+06	0.0773480662983425	7.70459e+06	0.038961038961039	2.79152e+06	0.180555555555556	1.67491e+06	0.129496402877698	8.19637e+06	0.0729613733905579	5.03568e+06	0.0985915492957746	9.87768e+06	0.196531791907514	1.44823e+07	0.0735632183908046	2.68072e+07	0.464285714285714	4.12746e+06
8	2	44036081	45036900	697313	0.6967416718291	0.341719077568134	2.57759e+07	0.1237721021611	3.46156e+07	0.0853413654618474	1.0629e+07	0.201465201465201	2.6931e+07	0	2.4255e+06	0.0786290322580645	1.34745e+07	0.0284090909090909	1.26271e+07	0.0837988826815642	3.14359e+07	0.400516795865633	8.87761e+06	0.0201900237529691	6.85404e+06	0.196029776674938	2.20627e+07	0.0440251572327044	0	0.010482180293501	3.17977e+06	0.0773480662983425	7.96709e+06	0.038961038961039	6.23511e+06	0.173611111111111	1.23627e+06	0.129496402877698	1.15947e+07	0.0772532188841202	3.72487e+06	0.0985915492957746	8.73316e+06	0.213872832369942	2.20627e+07	0.071264367816092	3.20732e+07	0.446428571428571	2.47255e+07
4	2	45036901	46037720	380211	0.379899482424412	0.345911949685535	1.45169e+07	0.121807465618861	1.68907e+06	0.0893574297188755	5.28511e+06	0.201465201465201	1.97568e+07	0	1.1121e+06	0.0766129032258065	4.70715e+06	0.0397727272727273	3.32926e+06	0.0856610800744879	1.58903e+07	0.403100775193798	1.2465e+06	0.0213776722090261	4.51246e+06	0.200992555831266	1.26855e+07	0.0440251572327044	0	0.0125786163522013	3.4836e+06	0.0773480662983425	3.24706e+06	0.038961038961039	0	0.180555555555556	0	0.129496402877698	4.4768e+06	0.0729613733905579	6.83148e+06	0.0957746478873239	9.24323e+06	0.208092485549133	1.20463e+07	0.0735632183908046	3.70914e+07	0.410714285714286	2.54528e+07
8	2	46037721	47038540	546849	0.54640095122	0.352201257861635	1.38809e+07	0.1237721021611	1.85822e+07	0.0913654618473896	8.65637e+06	0.194139194139194	2.73444e+07	0	1.54643e+06	0.0846774193548387	1.07084e+07	0.0284090909090909	920080	0.0875232774674116	2.93347e+07	0.403100775193798	6.9333e+06	0.0225653206650831	56093.8	0.205955334987593	1.42493e+07	0.0440251572327044	101592	0.0125786163522013	2.40086e+06	0.0773480662983425	3.95081e+06	0.038961038961039	0	0.166666666666667	1.56296e+06	0.129496402877698	7.78152e+06	0.0772532188841202	1.0687e+07	0.0957746478873239	8.1793e+06	0.213872832369942	1.54733e+07	0.0804597701149425	2.26226e+07	0.410714285714286	2.94945e+07
8	2	47038541	48039360	325782	0.325515077636338	0.356394129979036	2.53262e+07	0.119842829076621	3.17538e+07	0.0933734939759036	1.58894e+07	0.183150183150183	2.41584e+07	0	1.2979e+06	0.0826612903225806	2.00037e+07	0.0284090909090909	1.35137e+07	0.0875232774674116	8.1046e+07	0.395348837209302	1.29093e+07	0.0225653206650831	1.39353e+07	0.203473945409429	4.37086e+07	0.0440251572327044	213162	0.010482180293501	9.38287e+06	0.0773480662983425	6.63172e+06	0.038961038961039	8.89721e+06	0.180555555555556	0	0.129496402877698	1.4368e+07	0.0772532188841202	9.96603e+06	0.0929577464788732	1.27083e+07	0.208092485549133	3.04611e+07	0.0781609195402299	4.64366e+07	0.410714285714286	2.87769e+07
6	2	48039361	49040180	274759	0.274533882216582	0.352201257861635	7.87575e+07	0.117878192534381	4.5077e+07	0.0933734939759036	1.62709e+07	0.19047619047619	3.72419e+07	0	3.84731e+06	0.0806451612903226	3.26417e+06	0.0284090909090909	2.06012e+07	0.0875232774674116	9.6853e+07	0.395348837209302	1.34177e+07	0.0213776722090261	1.20279e+07	0.198511166253102	4.6962e+07	0.0440251572327044	5.05494e+06	0.0125786163522013	3.96465e+06	0.0773480662983425	1.01099e+06	0.038961038961039	5.27471e+06	0.166666666666667	3.11073e+06	0.129496402877698	1.08412e+06	0.0944206008583691	2.45916e+07	0.0929577464788732	2.31819e+07	0.213872832369942	5.59931e+07	0.0735632183908046	7.42766e+07	0.392857142857143	4.54944e+07
1	2	49040181	50041000	191685	0.191527947083392	0.352201257861635	4.61823e+07	0.115913555992141	4.89457e+07	0.0953815261044177	7.4086e+06	0.186813186813187	1.94117e+07	0	1.10294e+06	0.0846774193548387	1.40997e+07	0.0227272727272727	6.52112e+06	0.0875232774674116	3.4707e+07	0.395348837209302	4.72117e+06	0.0201900237529691	3.82657e+06	0.200992555831266	1.86318e+07	0.0440251572327044	0	0.010482180293501	2.26821e+06	0.0773480662983425	0	0.038961038961039	0	0.173611111111111	0	0.129496402877698	2.21995e+06	0.0944206008583691	3.47793e+06	0.0929577464788732	833369	0.202312138728324	2.76653e+07	0.0735632183908046	3.61169e+07	0.392857142857143	1.63028e+07
1	2	50041001	51041820	425006	0.424657780619892	0.348008385744235	2.9988e+07	0.113948919449902	4.36123e+07	0.0953815261044177	2.512e+06	0.183150183150183	1.30717e+07	0	1.49233e+06	0.0866935483870968	1.43082e+07	0.0227272727272727	2.94113e+06	0.0875232774674116	4.10903e+06	0.37984496124031	4.16444e+06	0.0225653206650831	4.3252e+06	0.200992555831266	1.62003e+07	0.0440251572327044	0	0.0125786163522013	1.53451e+06	0.0773480662983425	5.79177e+06	0.038961038961039	0	0.159722222222222	0	0.12589928057554	4.98497e+06	0.0944206008583691	1.08358e+07	0.0929577464788732	8.26901e+06	0.202312138728324	2.17192e+06	0.071264367816092	2.88848e+07	0.392857142857143	7.35284e+06
3	2	53043461	54044280	131643	0.131535141184229	0.364779874213836	2.01895e+07	0.117878192534381	1.56088e+07	0.0983935742971888	720029	0.186813186813187	1.76658e+07	0	481795	0.0866935483870968	1.71088e+07	0.0227272727272727	9.4364e+06	0.0893854748603352	3.46001e+07	0.382428940568475	1.68807e+06	0.0201900237529691	4.63755e+06	0.205955334987593	4.1792e+06	0.0440251572327044	0	0.0125786163522013	1.65137e+06	0.074585635359116	6.99046e+06	0.038961038961039	1.08519e+07	0.145833333333333	6.38345e+06	0.129496402877698	9.69741e+06	0.0901287553648069	0	0.0901408450704225	1.20576e+07	0.225433526011561	1.16866e+07	0.071264367816092	3.26104e+06	0.392857142857143	0
8	2	54044281	55045100	562122	0.561661437621151	0.360587002096436	2.36408e+07	0.111984282907662	2.76188e+07	0.100401606425703	7.37726e+06	0.19047619047619	2.81326e+07	0	1.50442e+06	0.0866935483870968	1.60268e+07	0.0227272727272727	1.43644e+07	0.0893854748603352	5.15644e+07	0.385012919896641	5.53458e+06	0.0213776722090261	6.95931e+06	0.208436724565757	3.75433e+07	0.0440251572327044	2.4708e+06	0.010482180293501	5.801e+06	0.074585635359116	5.45697e+06	0.038961038961039	1.01656e+07	0.145833333333333	4.48481e+06	0.129496402877698	1.13551e+07	0.0901287553648069	1.52149e+07	0.0957746478873239	1.2504e+07	0.225433526011561	1.64213e+07	0.071264367816092	4.45869e+07	0.410714285714286	1.18598e+06
7	2	55045101	56045920	490817	0.490414859814952	0.364779874213836	3.53153e+07	0.113948919449902	2.61088e+07	0.0953815261044177	1.84784e+06	0.186813186813187	5.97011e+07	0	1.29223e+06	0.0846774193548387	2.24345e+07	0.0227272727272727	1.5092e+07	0.0893854748603352	7.63505e+07	0.369509043927649	1.32875e+07	0.0213776722090261	6.22683e+06	0.210918114143921	4.79393e+07	0.0440251572327044	4.24462e+06	0.0125786163522013	3.10042e+06	0.074585635359116	1.12152e+07	0.038961038961039	2.9106e+06	0.145833333333333	3.42423e+06	0.129496402877698	1.99407e+06	0.0901287553648069	5.36163e+06	0.0929577464788732	1.95906e+07	0.225433526011561	3.60466e+07	0.071264367816092	4.654e+07	0.428571428571429	2.62893e+07
2	2	56045921	57046740	255099	0.254889990208029	0.362683438155136	2.21398e+07	0.110019646365422	1.25013e+07	0.0943775100401606	6.47942e+06	0.19047619047619	2.19816e+07	0	0	0.0846774193548387	1.49755e+07	0.0227272727272727	2.1778e+07	0.0893854748603352	3.64467e+07	0.369509043927649	1.18789e+07	0.0201900237529691	6.70913e+06	0.213399503722084	1.28106e+07	0.0566037735849057	2.74129e+06	0.010482180293501	5.12424e+06	0.074585635359116	2.39758e+06	0.038961038961039	0	0.145833333333333	0	0.129496402877698	1.6681e+06	0.0901287553648069	1.82936e+07	0.0873239436619718	8.73896e+06	0.23121387283237	2.9924e+07	0.071264367816092	2.07881e+07	0.410714285714286	1.26453e+07
2	2	58047561	59048380	192411	0.192253352251154	0.377358490566038	1.22907e+06	0.106090373280943	7.05503e+06	0.0973895582329317	4.90882e+06	0.179487179487179	2.39503e+07	0	0	0.0866935483870968	7.02325e+08	0.0284090909090909	3.18847e+06	0.0893854748603352	3.21477e+07	0.374677002583979	1.12983e+07	0.0201900237529691	3.18847e+06	0.220843672456576	6.83843e+06	0.050314465408805	3.63441e+06	0.010482180293501	3.40428e+06	0.074585635359116	476808	0.038961038961039	0	0.131944444444444	4.33101e+06	0.12589928057554	880883	0.0944206008583691	0	0.0845070422535211	993097	0.23121387283237	3.96733e+06	0.0758620689655172	1.84205e+07	0.428571428571429	0
2	2	60049201	61050020	141378	0.14126216502468	0.389937106918239	4.60245e+07	0.106090373280943	6.06734e+07	0.103413654618474	1.26158e+07	0.183150183150183	5.5669e+07	0	2.9908e+06	0.0887096774193548	2.07567e+07	0.0227272727272727	3.45036e+06	0.0893854748603352	7.59934e+07	0.37984496124031	1.84519e+07	0.0190023752969121	1.64092e+07	0.218362282878412	3.25741e+06	0.050314465408805	0	0.00838574423480084	1.39603e+07	0.0773480662983425	2.1697e+07	0.038961038961039	9.82394e+06	0.118055555555556	0	0.12589928057554	2.99713e+06	0.0901287553648069	4.53413e+06	0.0788732394366197	1.35157e+07	0.23121387283237	4.31953e+07	0.0850574712643678	9.58776e+07	0.428571428571429	4.71549e+07
6	2	61050021	62050840	542753	0.542308307188106	0.39832285115304	3.12389e+07	0.0962671905697446	2.54983e+07	0.107429718875502	1.65292e+07	0.183150183150183	3.66786e+07	0	1.16858e+06	0.092741935483871	2.24589e+07	0.0227272727272727	1.01731e+07	0.0912476722532588	6.39531e+07	0.390180878552972	9.82645e+06	0.0178147268408551	6.96539e+06	0.230769230769231	4.83569e+07	0.0440251572327044	1.27949e+06	0.00838574423480084	3.21126e+06	0.0773480662983425	6.78206e+06	0.038961038961039	0	0.118055555555556	4.53064e+06	0.12589928057554	1.24912e+07	0.0858369098712446	5.8677e+06	0.0845070422535211	2.36213e+07	0.225433526011561	1.38531e+07	0.0781609195402299	4.73507e+07	0.428571428571429	4.29907e+07
6	2	62050841	63051660	401116	0.400787354369417	0.373165618448637	1.25911e+07	0.104125736738703	1.29144e+07	0.106425702811245	6.5528e+06	0.179487179487179	1.60842e+07	0	1.05414e+06	0.094758064516129	8.46056e+06	0.0170454545454545	7.60075e+06	0.0893854748603352	3.29659e+07	0.37984496124031	6.58954e+06	0.0178147268408551	5.49936e+06	0.228287841191067	1.66203e+07	0.0440251572327044	0	0.0125786163522013	2.71573e+06	0.0773480662983425	3.82369e+06	0.038961038961039	0	0.118055555555556	0	0.12589928057554	7.39462e+06	0.0815450643776824	1.27034e+07	0.0845070422535211	8.87492e+06	0.213872832369942	5.5401e+06	0.0850574712643678	1.8538e+07	0.428571428571429	8.31015e+06
4	2	63051661	64052480	708509	0.707928498631123	0.364779874213836	1.82874e+07	0.100196463654224	1.32616e+07	0.10140562248996	4.02782e+06	0.179487179487179	1.48911e+07	0	1.49198e+06	0.092741935483871	5.41626e+06	0.0170454545454545	4.27701e+06	0.0856610800744879	2.06619e+07	0.372093023255814	1.85712e+06	0.0178147268408551	2.94406e+06	0.223325062034739	1.68807e+07	0.0440251572327044	980149	0.010482180293501	306164	0.0801104972375691	5.21138e+06	0.038961038961039	0	0.118055555555556	0	0.12589928057554	4.1864e+06	0.0901287553648069	4.52376e+06	0.0816901408450704	2.71426e+06	0.219653179190751	1.36928e+07	0.0827586206896552	1.5642e+07	0.428571428571429	4.55295e+06
6	2	64052481	65053300	198610	0.198447273235947	0.368972746331237	4.71504e+07	0.104125736738703	3.26655e+07	0.10140562248996	1.7445e+07	0.183150183150183	5.33663e+07	0	3.19344e+06	0.092741935483871	1.36388e+07	0.0170454545454545	2.13606e+07	0.0912476722532588	7.50558e+07	0.369509043927649	1.325e+07	0.0201900237529691	1.36416e+07	0.220843672456576	5.50181e+06	0.0377358490566038	3.47241e+06	0.0125786163522013	3.29085e+06	0.0773480662983425	1.54923e+07	0.038961038961039	2.12746e+07	0.118055555555556	4.19583e+06	0.12589928057554	1.06674e+06	0.0901287553648069	6.45512e+06	0.0845070422535211	3.06618e+07	0.219653179190751	4.88469e+06	0.0804597701149425	5.90841e+06	0.464285714285714	6.94482e+07
5	2	65053301	66054120	245499	0.245297855758278	0.358490566037736	1.88207e+07	0.102161100196464	1.1009e+07	0.0983935742971888	1.4565e+07	0.175824175824176	2.6159e+06	0	1.72234e+06	0.0887096774193548	1.91794e+07	0.0170454545454545	2.46869e+06	0.0875232774674116	5.55455e+07	0.361757105943152	8.77874e+06	0.0178147268408551	1.26031e+07	0.208436724565757	3.44973e+06	0.0377358490566038	2.8092e+06	0.0125786163522013	3.5575e+06	0.0773480662983425	1.00267e+07	0.038961038961039	1.16381e+07	0.118055555555556	678889	0.12589928057554	8.62995e+06	0.0858369098712446	7.93507e+06	0.0816901408450704	780831	0.219653179190751	2.12786e+06	0.0781609195402299	4.4682e+07	0.446428571428571	1.35778e+07
1	2	66054121	67054940	133252	0.133142822885234	0.356394129979036	2.46861e+07	0.102161100196464	2.70435e+07	0.0973895582329317	8.04062e+06	0.183150183150183	1.38333e+07	0	1.58659e+06	0.092741935483871	1.01413e+07	0.0170454545454545	0	0.0875232774674116	4.8166e+07	0.333333333333333	6.22787e+06	0.0154394299287411	921938	0.205955334987593	7.35743e+06	0.0377358490566038	0	0.010482180293501	1.63855e+06	0.0773480662983425	2.30202e+06	0.038961038961039	1.07208e+07	0.118055555555556	6.25381e+06	0.12589928057554	6.35981e+06	0.0858369098712446	0	0.0816901408450704	4.79526e+06	0.225433526011561	2.25702e+07	0.0804597701149425	2.68021e+07	0.446428571428571	0
10	2	68055761	69056580	386643	0.386326212505745	0.335429769392034	2.56158e+07	0.104125736738703	3.78635e+07	0.0903614457831325	1.00176e+07	0.175824175824176	1.54233e+07	0	1.63694e+06	0.0907258064516129	2.21356e+07	0.0170454545454545	1.88099e+07	0.0875232774674116	7.89241e+07	0.335917312661499	1.08671e+07	0.0166270783847981	1.11481e+07	0.208436724565757	3.11712e+07	0.0377358490566038	1.7837e+06	0.00838574423480084	7.8887e+06	0.074585635359116	1.19005e+07	0.038961038961039	3.69481e+06	0.118055555555556	0	0.12589928057554	7.67142e+06	0.0944206008583691	5.03837e+06	0.0816901408450704	1.66326e+06	0.219653179190751	2.70217e+07	0.0735632183908046	4.98893e+07	0.446428571428571	3.44849e+07
9	2	69056581	70057400	564955	0.564492116464499	0.310272536687631	1.91801e+07	0.102161100196464	2.33631e+07	0.0913654618473896	7.67784e+06	0.172161172161172	2.74803e+07	0	74685.8	0.0866935483870968	8.75082e+06	0.0170454545454545	2.14552e+06	0.0875232774674116	3.97806e+07	0.328165374677003	5.20604e+06	0.0166270783847981	6.52353e+06	0.213399503722084	1.83902e+07	0.0377358490566038	2.44145e+06	0.00628930817610063	3.09856e+06	0.074585635359116	3.26779e+06	0.038961038961039	5.05729e+06	0.111111111111111	1.47504e+06	0.12589928057554	9.00027e+06	0.103004291845494	8.04569e+06	0.0816901408450704	8.50987e+06	0.225433526011561	1.59704e+07	0.0735632183908046	3.16559e+07	0.446428571428571	3.5401e+07
14	2	70057401	71058220	357843	0.357549809156492	0.29979035639413	4.16205e+07	0.102161100196464	4.69931e+06	0.0903614457831325	2.12698e+07	0.172161172161172	7.27341e+07	0	3.53737e+06	0.0866935483870968	2.76312e+07	0.0170454545454545	2.8792e+07	0.0875232774674116	8.70047e+07	0.317829457364341	2.05312e+07	0.0178147268408551	1.4726e+07	0.205955334987593	3.96642e+07	0.0377358490566038	1.92726e+06	0.00838574423480084	1.22567e+06	0.074585635359116	1.02551e+07	0.051948051948052	1.21501e+07	0.111111111111111	0	0.12589928057554	1.89459e+07	0.103004291845494	2.72194e+07	0.0788732394366197	2.49989e+07	0.225433526011561	5.29265e+07	0.071264367816092	7.12744e+07	0.428571428571429	5.40875e+06
10	2	71058221	72059040	455896	0.45552247157331	0.30188679245283	7.60052e+07	0.100196463654224	5.66855e+07	0.0863453815261044	1.79164e+07	0.175824175824176	5.80922e+07	0	2.77656e+06	0.0866935483870968	2.4153e+07	0.0170454545454545	1.7282e+07	0.0875232774674116	9.99504e+07	0.31266149870801	2.10574e+07	0.0166270783847981	1.23049e+07	0.198511166253102	5.50134e+07	0.0377358490566038	4.53824e+06	0.00838574423480084	6.70497e+06	0.074585635359116	1.07326e+07	0.051948051948052	6.35792e+06	0.111111111111111	5.52979e+06	0.12589928057554	1.02239e+07	0.0987124463519313	1.14692e+07	0.076056338028169	3.00381e+06	0.219653179190751	2.96862e+07	0.0689655172413793	8.14247e+07	0.428571428571429	5.84929e+07
2	2	72059041	73059860	662184	0.661641454007714	0.291404612159329	9.07e+06	0.100196463654224	1.1851e+07	0.0833333333333333	2.28014e+06	0.172161172161172	5.51655e+06	0	0	0.0887096774193548	544200	0.0170454545454545	3.66098e+06	0.0875232774674116	1.49767e+07	0.317829457364341	3.03244e+06	0.0166270783847981	1.65951e+06	0.198511166253102	5.37595e+06	0.0377358490566038	0	0.0125786163522013	993523	0.074585635359116	3.23275e+06	0.038961038961039	0	0.111111111111111	1.25846e+06	0.12589928057554	639896	0.0901287553648069	1.94859e+06	0.0788732394366197	2.88565e+06	0.225433526011561	6.86434e+06	0.0689655172413793	8.749e+06	0.392857142857143	1.41577e+07
16	2	73059861	74060680	521990	0.521562318898503	0.293501048218029	5.96138e+07	0.102161100196464	5.25216e+07	0.0853413654618474	1.83304e+06	0.168498168498169	6.06797e+07	0	2.02083e+06	0.0866935483870968	2.84773e+06	0.0170454545454545	2.0899e+07	0.0856610800744879	8.45298e+07	0.315245478036176	2.08569e+06	0.0178147268408551	175435	0.196029776674938	6.19982e+07	0.0377358490566038	2.64241e+06	0.0125786163522013	5.04144e+06	0.074585635359116	1.05454e+06	0.051948051948052	2.77644e+06	0.118055555555556	0	0.122302158273381	2.10166e+07	0.0901287553648069	2.47193e+07	0.0816901408450704	2.32583e+07	0.219653179190751	3.62831e+07	0.071264367816092	8.12741e+07	0.410714285714286	5.56184e+07
26	2	74060681	75061500	410648	0.410311544533483	0.29559748427673	1.06036e+08	0.100196463654224	7.89934e+07	0.0853413654618474	3.7508e+06	0.161172161172161	1.18497e+08	0	7.70625e+06	0.0846774193548387	6.71584e+07	0.0170454545454545	4.42759e+07	0.0856610800744879	1.76236e+08	0.322997416020672	3.86064e+07	0.0166270783847981	2.85442e+07	0.198511166253102	1.13062e+07	0.0377358490566038	1.69109e+06	0.00838574423480084	1.90579e+06	0.074585635359116	2.45752e+07	0.051948051948052	3.47882e+07	0.111111111111111	4.09273e+06	0.12589928057554	3.92105e+07	0.103004291845494	4.21473e+07	0.076056338028169	4.40651e+07	0.208092485549133	5.99707e+06	0.0735632183908046	1.40919e+07	0.410714285714286	4.87035e+07
5	2	75061501	76062320	271274	0.271051737575188	0.29979035639413	2.89559e+07	0.0982318271119843	2.23664e+07	0.0873493975903614	9.45208e+06	0.164835164835165	3.63672e+07	0	1.5554e+06	0.0866935483870968	1.83067e+07	0.0170454545454545	1.56389e+07	0.0837988826815642	5.4612e+07	0.310077519379845	5.92178e+06	0.0178147268408551	1.03523e+07	0.186104218362283	3.63935e+07	0.0377358490566038	0	0.00838574423480084	7.99633e+06	0.074585635359116	5.65385e+06	0.051948051948052	0	0.118055555555556	6.24798e+06	0.12589928057554	4.68599e+06	0.0901287553648069	2.56642e+07	0.0788732394366197	1.28728e+07	0.202312138728324	2.7306e+07	0.071264367816092	4.01294e+07	0.392857142857143	3.5674e+06
1	2	76062321	77063140	87321	0.0872494554465338	0.293501048218029	1.3674e+07	0.102161100196464	3.35306e+07	0.0853413654618474	0	0.161172161172161	0	0	0	0.0846774193548387	1.03404e+07	0.0170454545454545	0	0.0837988826815642	1.8851e+07	0.302325581395349	4.5808e+06	0.0166270783847981	2.79317e+06	0.196029776674938	1.10115e+06	0.0377358490566038	0	0.00419287211740042	2.47879e+06	0.074585635359116	3.51288e+06	0.051948051948052	0	0.111111111111111	0	0.122302158273381	0	0.0901287553648069	0	0.0788732394366197	0	0.202312138728324	1.70925e+07	0.071264367816092	1.1597e+06	0.375	0
1	2	77063141	78063960	685656	0.685094222737355	0.274633123689727	1.33369e+07	0.102161100196464	1.99475e+07	0.0823293172690763	1.36145e+06	0.157509157509158	4.57812e+06	0	0	0.0846774193548387	5.27948e+06	0.0170454545454545	2.65174e+06	0.0800744878957169	9.30292e+06	0.310077519379845	58808.8	0.0166270783847981	533582	0.186104218362283	5.142e+06	0.0377358490566038	0	0.00419287211740042	313647	0.074585635359116	0	0.051948051948052	0	0.104166666666667	1.21538e+06	0.12589928057554	617990	0.0987124463519313	3.66907e+06	0.0816901408450704	928954	0.196531791907514	9.72305e+06	0.0758620689655172	7.7735e+06	0.375	0
5	2	79064781	80065600	196033	0.195872384644591	0.264150943396226	1.81972e+06	0.100196463654224	1.7195e+08	0.0833333333333333	1.13095e+07	0.157509157509158	2.97378e+07	0	2.1524e+06	0.0866935483870968	6.5072e+06	0.0170454545454545	1.85498e+07	0.0800744878957169	3.65863e+07	0.30749354005168	1.45156e+07	0.0166270783847981	6.22095e+06	0.181141439205955	565004	0.0377358490566038	0	0.010482180293501	8.81414e+06	0.074585635359116	6.25912e+06	0.051948051948052	0	0.111111111111111	0	0.12589928057554	4.32304e+06	0.107296137339056	1.28332e+07	0.076056338028169	1.1336e+07	0.173410404624277	2.93593e+07	0.0758620689655172	3.62521e+07	0.375	3.18824e+07
2	2	80065601	81066420	810965	0.810300553546092	0.257861635220126	3.10955e+07	0.106090373280943	2.65033e+07	0.0833333333333333	3.44121e+06	0.157509157509158	1.16121e+07	0.00208768267223382	260697	0.092741935483871	1.81005e+07	0.0170454545454545	597866	0.0800744878957169	1.99621e+07	0.304909560723514	248609	0.0166270783847981	1.65416e+06	0.183622828784119	1.59991e+07	0.0377358490566038	0	0.010482180293501	2.67483e+06	0.074585635359116	3.02601e+06	0.038961038961039	0	0.0972222222222222	1.02758e+06	0.12589928057554	1.56088e+06	0.11587982832618	6.32358e+06	0.076056338028169	7.43774e+06	0.161849710982659	1.40926e+07	0.071264367816092	2.39769e+07	0.375	7.70687e+06
3	2	84068881	85069700	357767	0.357473871425431	0.253668763102725	1.76703e+07	0.0982318271119843	1.48742e+07	0.0863453815261044	1.73264e+07	0.157509157509158	4.96909e+06	0	589687	0.0907258064516129	6.98779e+06	0.0170454545454545	8.57397e+06	0.0800744878957169	6.3708e+07	0.30749354005168	4.47218e+06	0.0213776722090261	6.15815e+06	0.181141439205955	1.76906e+07	0.0377358490566038	0	0.0167714884696017	4.2627e+06	0.074585635359116	9.40253e+06	0.038961038961039	3.93678e+06	0.0902777777777778	4.62003e+06	0.122302158273381	7.10623e+06	0.175965665236052	1.62297e+07	0.0788732394366197	2.14322e+07	0.202312138728324	1.86341e+07	0.0804597701149425	1.7113e+07	0.392857142857143	9.0165e+06
21	2	85069701	86070520	471120	0.47073399812154	0.249475890985325	3.88133e+07	0.0962671905697446	2.7768e+07	0.0813253012048193	1.59502e+07	0.157509157509158	4.90557e+06	0	4.92587e+06	0.0866935483870968	2.113e+07	0.0170454545454545	1.801e+07	0.0800744878957169	6.69837e+07	0.30749354005168	1.36942e+07	0.0249406175771971	1.27617e+07	0.178660049627792	6.00736e+07	0.0377358490566038	2.94806e+06	0.0209643605870021	6.92153e+06	0.074585635359116	1.23332e+07	0.038961038961039	8.96874e+06	0.0972222222222222	1.75422e+06	0.12589928057554	1.88876e+07	0.180257510729614	6.89156e+06	0.076056338028169	2.02153e+07	0.196531791907514	2.67291e+07	0.0827586206896552	6.01043e+07	0.410714285714286	2.05413e+07
12	2	86070521	87071340	552558	0.552105273675586	0.245283018867925	2.89562e+07	0.102161100196464	2.35351e+07	0.0773092369477912	1.41779e+07	0.157509157509158	5.06734e+07	0	1.14542e+06	0.0806451612903226	1.91144e+07	0.0227272727272727	1.54492e+07	0.0800744878957169	5.89657e+07	0.304909560723514	8.65226e+06	0.0201900237529691	1.14766e+07	0.1712158808933	4.58097e+07	0.0377358490566038	1.25678e+06	0.0146750524109015	750776	0.074585635359116	1.16223e+06	0.038961038961039	2.54896e+06	0.0972222222222222	2.99135e+06	0.12589928057554	2.16553e+07	0.158798283261803	1.34057e+07	0.0816901408450704	1.32986e+07	0.196531791907514	2.01085e+07	0.0735632183908046	5.33356e+07	0.392857142857143	565551
4	2	87071341	88072160	43859	0.043823065086629	0.236897274633124	8.39672e+07	0.0962671905697446	3.04004e+07	0.0763052208835341	1.57606e+07	0.153846153846154	6.08009e+07	0	0	0.0806451612903226	2.04947e+06	0.0227272727272727	0	0.0800744878957169	1.02788e+08	0.289405684754522	0	0.0190023752969121	2.22442e+07	0.168734491315136	2.13087e+07	0.0314465408805031	0	0.00838574423480084	1.47416e+07	0.074585635359116	6.97258e+06	0.038961038961039	0	0.0972222222222222	0	0.12589928057554	9.74373e+06	0.15450643776824	1.40743e+07	0.076056338028169	1.44764e+07	0.179190751445087	6.60879e+07	0.0666666666666667	5.71437e+06	0.375	0
8	2	88072161	89072980	246200	0.245998281409244	0.224318658280922	7.5091e+07	0.0962671905697446	5.78956e+07	0.0742971887550201	1.90539e+07	0.128205128205128	3.86832e+07	0	1.71381e+06	0.0806451612903226	3.70894e+07	0.0170454545454545	4.40429e+07	0.0782122905027933	8.37215e+07	0.289405684754522	1.24498e+07	0.0178147268408551	1.13927e+07	0.15136476426799	5.07717e+07	0.0314465408805031	0	0.00838574423480084	8.73492e+06	0.0718232044198895	2.47667e+06	0.038961038961039	0	0.0902777777777778	0	0.129496402877698	2.07408e+07	0.163090128755365	2.50725e+07	0.0676056338028169	1.66046e+07	0.173410404624277	3.4568e+07	0.0620689655172414	7.2929e+07	0.375	2.38926e+07
8	2	95077901	96078720	185564	0.185411962191003	0.226415094339623	9.35277e+07	0.113948919449902	7.87154e+07	0.070281124497992	1.99592e+07	0.0659340659340659	6.73622e+07	0.00208768267223382	45572.7	0.094758064516129	3.79678e+07	0.0227272727272727	6.49274e+07	0.0875232774674116	1.09775e+08	0.338501291989664	3.39641e+07	0.0190023752969121	2.36301e+07	0.129032258064516	5.3555e+07	0.0125786163522013	7.2824e+06	0.0125786163522013	4.62573e+06	0.0718232044198895	1.648e+07	0.051948051948052	1.49694e+06	0.0902777777777778	0	0.133093525179856	2.50121e+07	0.201716738197425	2.61284e+07	0.0704225352112676	3.24021e+07	0.213872832369942	5.63027e+07	0.0735632183908046	1.14601e+08	0.464285714285714	5.5748e+07
11	2	96078721	97079540	141134	0.141018364940749	0.228511530398323	1.40538e+08	0.115913555992141	1.53545e+08	0.0662650602409639	6.61964e+07	0.0695970695970696	1.48854e+08	0.00208768267223382	8.9879e+06	0.0967741935483871	8.43122e+07	0.0227272727272727	7.2562e+07	0.0893854748603352	2.44478e+08	0.335917312661499	6.38604e+07	0.0190023752969121	5.00557e+07	0.121588089330025	1.24268e+08	0.0125786163522013	0	0.010482180293501	2.73101e+07	0.0718232044198895	3.46689e+07	0.051948051948052	1.96818e+07	0.0902777777777778	5.66837e+06	0.133093525179856	4.48447e+07	0.188841201716738	4.75245e+07	0.0704225352112676	7.6236e+07	0.196531791907514	9.30937e+07	0.0781609195402299	2.24132e+08	0.464285714285714	1.46596e+08
11	2	97079541	98080360	338172	0.337894926160548	0.222222222222222	4.44369e+07	0.115913555992141	3.60456e+07	0.0622489959839357	2.14133e+07	0.0659340659340659	6.92871e+07	0.00208768267223382	5.0014e+06	0.0846774193548387	3.41201e+07	0.0227272727272727	3.02833e+07	0.0875232774674116	1.03253e+08	0.322997416020672	1.361e+07	0.0201900237529691	1.2261e+07	0.119106699751861	6.73303e+07	0.0125786163522013	3.99605e+06	0.0125786163522013	1.26641e+07	0.0718232044198895	1.44689e+07	0.051948051948052	2.46423e+07	0.0902777777777778	7.09698e+06	0.133093525179856	2.49542e+07	0.163090128755365	2.62462e+06	0.0704225352112676	2.71377e+07	0.202312138728324	6.52296e+07	0.0735632183908046	7.76987e+07	0.428571428571429	5.72337e+07
6	2	98080361	99081180	509618	0.509200455626386	0.218029350104822	5.37094e+07	0.110019646365422	2.38653e+06	0.0612449799196787	1.3564e+06	0.0586080586080586	2.36122e+07	0.00208768267223382	2.07426e+06	0.0887096774193548	2.36362e+06	0.0227272727272727	3.07341e+07	0.0875232774674116	5.75703e+07	0.30749354005168	1.47169e+07	0.0213776722090261	1.12608e+07	0.121588089330025	3.30099e+07	0.0125786163522013	3.97754e+06	0.010482180293501	6.27587e+06	0.0718232044198895	4.80062e+06	0.051948051948052	5.52748e+06	0.0902777777777778	1.5698e+06	0.136690647482014	1.57978e+07	0.167381974248927	1.77312e+07	0.076056338028169	2.18723e+07	0.208092485549133	1.30817e+07	0.0781609195402299	4.26577e+07	0.428571428571429	3.79791e+07
13	2	99081181	100082000	480298	0.479904478327771	0.209643605870021	3.47942e+07	0.110019646365422	3.20314e+07	0.0592369477911647	1.66082e+06	0.0586080586080586	3.71484e+07	0.00208768267223382	3.08124e+06	0.0846774193548387	2.64987e+07	0.0227272727272727	2.88476e+07	0.0875232774674116	8.99647e+07	0.289405684754522	1.45657e+06	0.0201900237529691	9.38313e+06	0.121588089330025	3.60101e+06	0.0125786163522013	5.62714e+06	0.00628930817610063	665898	0.0718232044198895	9.55065e+06	0.051948051948052	8.67517e+06	0.0833333333333333	1.66563e+06	0.136690647482014	1.67622e+07	0.163090128755365	1.13566e+07	0.0704225352112676	1.9168e+07	0.190751445086705	5.35819e+07	0.0735632183908046	7.60025e+07	0.410714285714286	5.85574e+07
3	2	100082001	101082820	604208	0.603712955376591	0.19706498951782	1.36818e+07	0.104125736738703	890615	0.0562248995983936	3.63539e+06	0.0622710622710623	1.99986e+07	0.00208768267223382	1.74953e+06	0.0826612903225806	1.05083e+07	0.0227272727272727	1.19643e+07	0.0875232774674116	3.48074e+07	0.276485788113695	6.64682e+06	0.0190023752969121	2.82227e+06	0.109181141439206	1.58354e+07	0.0125786163522013	0	0.00628930817610063	3.52891e+06	0.0718232044198895	2.53067e+06	0.051948051948052	0	0.0902777777777778	0	0.136690647482014	2.80519e+06	0.150214592274678	7.02146e+06	0.0732394366197183	6.32507e+06	0.190751445086705	1.70374e+07	0.0735632183908046	1.87687e+06	0.375	3.89426e+07
8	2	101082821	102083640	401333	0.401004176575208	0.188679245283019	3.10636e+07	0.100196463654224	228035	0.0522088353413655	1.55551e+07	0.0659340659340659	3.21844e+07	0.00208768267223382	2.10714e+06	0.0846774193548387	1.70275e+07	0.0227272727272727	1.50102e+07	0.0893854748603352	5.33203e+07	0.268733850129199	1.08765e+07	0.0201900237529691	9.72369e+06	0.106699751861042	2.76855e+07	0.0125786163522013	3.36716e+06	0.00419287211740042	4.77133e+06	0.0718232044198895	8.38185e+06	0.051948051948052	3.46069e+06	0.0902777777777778	2.00943e+06	0.136690647482014	739062	0.141630901287554	8.9522e+06	0.076056338028169	1.91057e+07	0.196531791907514	2.39941e+07	0.0758620689655172	4.17423e+07	0.375	1.4657e+07
7	2	102083641	103084460	360182	0.359886892747947	0.184486373165618	4.77419e+07	0.0962671905697446	4.09019e+07	0.0512048192771084	2.30298e+07	0.0659340659340659	3.12342e+07	0.00208768267223382	2.93486e+06	0.0846774193548387	1.69982e+06	0.0284090909090909	1.00959e+07	0.0875232774674116	8.34055e+07	0.271317829457364	9.95513e+06	0.0190023752969121	2.16429e+07	0.106699751861042	3.25624e+07	0.0125786163522013	1.87593e+06	0.00628930817610063	7.10373e+06	0.0718232044198895	1.01885e+07	0.051948051948052	385608	0.0902777777777778	4.47802e+06	0.136690647482014	1.05879e+07	0.145922746781116	2.16125e+07	0.0704225352112676	1.76839e+07	0.213872832369942	2.10331e+07	0.0804597701149425	4.24368e+06	0.357142857142857	2.37975e+07
4	2	103084461	104085280	218712	0.218532803101457	0.186582809224319	5.33628e+07	0.0943025540275049	7.12819e+07	0.0471887550200803	1.37114e+07	0.0622710622710623	3.42917e+07	0.00208768267223382	966643	0.0826612903225806	1.75855e+07	0.0227272727272727	1.92805e+07	0.0875232774674116	5.2684e+07	0.258397932816537	1.44007e+07	0.0190023752969121	1.8958e+07	0.0942928039702233	4.90883e+07	0.0125786163522013	0	0.00838574423480084	2.93091e+06	0.0718232044198895	1.11859e+07	0.051948051948052	1.90509e+07	0.0902777777777778	3.68728e+06	0.136690647482014	7.74953e+06	0.137339055793991	1.61373e+06	0.0676056338028169	1.75293e+07	0.219653179190751	3.16539e+07	0.0850574712643678	6.63328e+07	0.357142857142857	2.6127e+07
6	2	105086101	106086920	138228	0.138114745908355	0.176100628930818	7.95408e+07	0.0943025540275049	8.84207e+07	0.0451807228915663	2.00724e+07	0.0586080586080586	7.87008e+07	0.00208768267223382	6.11791e+06	0.0846774193548387	5.06246e+07	0.0227272727272727	2.61485e+07	0.0856610800744879	9.84478e+07	0.253229974160207	1.42973e+07	0.0178147268408551	2.03165e+07	0.0769230769230769	6.15696e+07	0.0125786163522013	4.88812e+06	0.00628930817610063	1.40021e+06	0.0718232044198895	1.76989e+07	0.051948051948052	3.01434e+07	0.0902777777777778	5.78754e+06	0.133093525179856	1.8315e+07	0.137339055793991	1.26182e+07	0.0676056338028169	3.02404e+07	0.219653179190751	2.76123e+07	0.0919540229885057	1.37073e+08	0.357142857142857	8.03825e+07
3	2	106086921	107087740	201399	0.201233988129734	0.182389937106918	5.48793e+06	0.0943025540275049	4.51388e+07	0.0481927710843374	2.06647e+07	0.0586080586080586	6.0248e+07	0.00208768267223382	0	0.0887096774193548	2.25182e+07	0.0227272727272727	4.18758e+07	0.0893854748603352	8.22405e+07	0.24031007751938	1.93956e+07	0.0190023752969121	85084.2	0.0942928039702233	3.39242e+07	0.0125786163522013	0	0.00419287211740042	5.339e+06	0.074585635359116	6.09235e+06	0.051948051948052	6.89621e+06	0.0833333333333333	0	0.136690647482014	8.41571e+06	0.145922746781116	2.04452e+07	0.0647887323943662	9.54859e+06	0.208092485549133	4.51388e+07	0.0942528735632184	7.20553e+07	0.339285714285714	1.37924e+07
6	2	108088561	109089380	152124	0.15199936052437	0.176100628930818	1.06692e+07	0.0903732809430255	1.57068e+08	0.0461847389558233	3.50388e+06	0.0586080586080586	8.25136e+07	0.00208768267223382	4.16929e+06	0.0866935483870968	5.96244e+06	0.0227272727272727	3.56399e+07	0.0875232774674116	1.36381e+08	0.24031007751938	2.35706e+07	0.0201900237529691	2.81266e+06	0.0918114143920596	1.04116e+08	0.0125786163522013	4.44161e+06	0.00419287211740042	1.14075e+07	0.0718232044198895	1.00514e+07	0.051948051948052	1.826e+07	0.0833333333333333	1.05177e+07	0.136690647482014	3.06396e+07	0.15450643776824	2.70677e+06	0.0647887323943662	7.60929e+07	0.213872832369942	5.018e+07	0.0850574712643678	1.0956e+08	0.321428571428571	8.88322e+07
5	2	109089381	110090200	246930	0.246727683299694	0.180293501048218	7.0523e+07	0.0943025540275049	5.84961e+07	0.0471887550200803	2.76865e+07	0.0659340659340659	8.64168e+07	0.00208768267223382	4.2809e+06	0.0866935483870968	3.76506e+07	0.0284090909090909	3.92701e+07	0.0875232774674116	1.07545e+08	0.248062015503876	2.4396e+07	0.0190023752969121	2.22785e+07	0.086848635235732	7.77348e+07	0.0125786163522013	5.47261e+06	0.00419287211740042	7.07377e+06	0.0718232044198895	2.97228e+07	0.051948051948052	5.62463e+06	0.0833333333333333	3.23978e+06	0.136690647482014	3.43198e+07	0.158798283261803	1.45499e+07	0.0647887323943662	2.99498e+07	0.213872832369942	3.73821e+07	0.0942528735632184	1.14032e+08	0.321428571428571	5.47261e+07
4	2	110090201	111091020	120017	0.119918666693311	0.174004192872117	4.59253e+07	0.0943025540275049	3.34028e+06	0.040160642570281103	1.63376e+07	0.0549450549450549	4.82025e+06	0.00208768267223382	0	0.0846774193548387	1.50808e+07	0.0284090909090909	1.51494e+07	0.0875232774674116	9.48796e+07	0.242894056847545	1.33314e+07	0.0178147268408551	1.4243e+07	0.0843672456575682	4.35836e+07	0.0125786163522013	0	0.00628930817610063	1.09634e+07	0.0718232044198895	1.01922e+06	0.051948051948052	2.31449e+07	0.0833333333333333	0	0.136690647482014	2.4714e+06	0.141630901287554	9.80253e+06	0.0647887323943662	2.67056e+07	0.213872832369942	3.84561e+07	0.0942528735632184	5.26241e+07	0.303571428571429	4.38534e+07
3	2	111091021	112091840	429945	0.429592733958154	0.165618448637317	1.21456e+07	0.0903732809430255	1.18091e+07	0.0421686746987952	8.41333e+06	0.0622710622710623	1.75907e+07	0.00417536534446764	492771	0.0846774193548387	9.99812e+06	0.0284090909090909	845774	0.0837988826815642	2.83527e+07	0.237726098191214	2.81356e+06	0.0190023752969121	5.11182e+06	0.0843672456575682	1.36394e+07	0.0125786163522013	0	0	1.02012e+06	0.0718232044198895	2.13383e+06	0.051948051948052	9.69116e+06	0.0902777777777778	1.87571e+06	0.140287769784173	4.94868e+06	0.145922746781116	4.17823e+06	0.0676056338028169	3.73936e+06	0.225433526011561	540902	0.0873563218390805	1.52217e+07	0.321428571428571	0
6	2	112091841	113092660	431625	0.431271357486861	0.169811320754717	3.09314e+07	0.0962671905697446	2.21386e+07	0.0391566265060241	1.10711e+07	0.0586080586080586	3.50444e+07	0.00208768267223382	1.95926e+06	0.0826612903225806	1.93505e+07	0.0284090909090909	1.40414e+07	0.0856610800744879	5.7442e+07	0.255813953488372	9.34204e+06	0.0190023752969121	5.94058e+06	0.0843672456575682	3.92078e+07	0.0125786163522013	1.56542e+06	0	7.082e+06	0.0718232044198895	566808	0.051948051948052	0	0.0833333333333333	5.60522e+06	0.140287769784173	1.77459e+07	0.133047210300429	1.07759e+07	0.0704225352112676	1.27463e+07	0.213872832369942	1.43679e+07	0.0873563218390805	4.06354e+07	0.339285714285714	4.50494e+07
17	2	113092661	114093480	325147	0.324880597909714	0.176100628930818	7.10359e+07	0.0962671905697446	6.28775e+07	0.040160642570281103	2.54502e+07	0.0659340659340659	7.68883e+07	0.00208768267223382	5.20175e+06	0.0846774193548387	3.40953e+07	0.0284090909090909	3.91431e+07	0.0856610800744879	9.38513e+07	0.286821705426357	3.3883e+06	0.0190023752969121	2.17538e+07	0.0794044665012407	7.68883e+07	0.0125786163522013	415612	0	1.41326e+07	0.0718232044198895	2.35132e+07	0.051948051948052	8.54314e+06	0.0833333333333333	9.92107e+06	0.140287769784173	2.87922e+07	0.145922746781116	3.63968e+07	0.0732394366197183	2.57948e+07	0.213872832369942	3.5762e+07	0.0896551724137931	8.69522e+07	0.375	9.66596e+07
5	2	114093481	115094300	178436	0.178289802362063	0.167714884696017	2.62699e+07	0.0884086444007859	2.71572e+07	0.0391566265060241	1.57129e+07	0.0586080586080586	3.51731e+07	0.00208768267223382	2.36966e+06	0.0846774193548387	1.90621e+07	0.0284090909090909	2.37756e+07	0.0856610800744879	8.56848e+07	0.248062015503876	1.35587e+07	0.0190023752969121	1.09485e+06	0.0818858560794045	2.74214e+07	0.0125786163522013	0	0	4.94857e+06	0.0718232044198895	5.14151e+06	0.051948051948052	0	0.0833333333333333	4.51956e+06	0.140287769784173	2.14631e+06	0.133047210300429	1.29578e+07	0.0704225352112676	9.03911e+06	0.213872832369942	6.08213e+07	0.0850574712643678	6.04669e+07	0.357142857142857	3.20243e+07
1	2	115094301	116095120	175311	0.175167362762535	0.165618448637317	1.03982e+07	0.0844793713163065	1.24817e+06	0.0431726907630522	13405.8	0.0549450549450549	0	0.00208768267223382	0	0.0907258064516129	1.2964e+06	0.0284090909090909	6.91412e+06	0.0856610800744879	707126	0.258397932816537	0	0.0190023752969121	1.39295e+06	0.0769230769230769	5.24922e+06	0.0125786163522013	0	0.00419287211740042	2.55791e+06	0.0718232044198895	3.48878e+06	0.051948051948052	0	0.0833333333333333	0	0.140287769784173	0	0.124463519313305	0	0.0732394366197183	0	0.202312138728324	0	0.0873563218390805	6.03614e+06	0.357142857142857	0
1	2	116095121	117095940	504800	0.504386403149418	0.157232704402516	2.77852e+07	0.0884086444007859	1.35265e+07	0.0391566265060241	4.18517e+06	0.0549450549450549	1.32066e+07	0.00208768267223382	418812	0.0907258064516129	9.92748e+06	0.0284090909090909	480238	0.0875232774674116	1.80837e+07	0.260981912144703	6.5487e+06	0.0190023752969121	3.62817e+06	0.0794044665012407	9.11495e+06	0.0125786163522013	0	0.00419287211740042	1.34761e+06	0.0718232044198895	3.02903e+06	0.0649350649350649	0	0.0833333333333333	0	0.140287769784173	1.68594e+06	0.124463519313305	4.60694e+06	0.0704225352112676	4.48766e+06	0.196531791907514	1.35067e+07	0.0850574712643678	1.2611e+07	0.357142857142857	2.26398e+07
3	2	118096761	119097580	121366	0.121266561419636	0.165618448637317	6.86628e+07	0.0825147347740668	4.3366e+07	0.0381526104417671	1.93416e+07	0.0622710622710623	3.46199e+07	0.00208768267223382	0	0.094758064516129	1.88117e+07	0.0284090909090909	1.99746e+07	0.0856610800744879	9.70359e+07	0.242894056847545	1.6612e+07	0.0178147268408551	8.01902e+06	0.0620347394540943	3.24588e+07	0.0125786163522013	5.56726e+06	0.00419287211740042	1.13388e+07	0.0718232044198895	1.25987e+07	0.0649350649350649	1.1605e+07	0.0833333333333333	0	0.140287769784173	7.01237e+06	0.137339055793991	3.90037e+07	0.0732394366197183	2.15413e+07	0.213872832369942	3.21857e+07	0.0781609195402299	7.37222e+07	0.357142857142857	9.41662e+06
5	2	119097581	120098400	113248	0.113155212725565	0.161425576519916	9.40357e+07	0.0844793713163065	6.21024e+07	0.0331325301204819	1.6505e+07	0.0659340659340659	4.82321e+07	0.00208768267223382	5.60054e+06	0.094758064516129	3.21829e+07	0.0340909090909091	4.3074e+07	0.0875232774674116	1.27709e+08	0.250645994832041	1.80946e+07	0.0178147268408551	1.50576e+07	0.0620347394540943	6.44147e+07	0.0125786163522013	0	0.00209643605870021	813841	0.069060773480663	2.68394e+06	0.0649350649350649	1.24369e+06	0.0833333333333333	0	0.151079136690647	1.87876e+07	0.150214592274678	3.09831e+06	0.0704225352112676	3.16391e+07	0.208092485549133	6.8451e+06	0.0781609195402299	9.93973e+06	0.357142857142857	2.52291e+07
7	2	120098401	121099220	432953	0.432598269419076	0.167714884696017	3.73897e+07	0.0884086444007859	2.54936e+07	0.036144578313253	9.48828e+06	0.0622710622710623	2.91141e+07	0.00208768267223382	1.46494e+06	0.092741935483871	1.94669e+07	0.0340909090909091	1.40837e+07	0.0875232774674116	5.69061e+07	0.242894056847545	1.1406e+07	0.0201900237529691	9.30656e+06	0.0645161290322581	3.58042e+07	0.0125786163522013	0	0	5.9362e+06	0.069060773480663	7.04183e+06	0.0649350649350649	3.25313e+06	0.0833333333333333	1.86268e+06	0.147482014388489	8.84573e+06	0.145922746781116	8.05716e+06	0.0647887323943662	9.71727e+06	0.23121387283237	2.74967e+06	0.0735632183908046	3.6883e+07	0.392857142857143	4.07598e+07
3	2	121099221	122100040	257810	0.257598769009412	0.167714884696017	3.14774e+07	0.0844793713163065	3.40996e+07	0.03714859437751	7.75765e+06	0.0659340659340659	3.12278e+07	0.00208768267223382	164010	0.0887096774193548	1.85126e+07	0.0340909090909091	1.6556e+07	0.0875232774674116	5.39173e+07	0.245478036175711	1.58968e+07	0.0213776722090261	1.42082e+07	0.0645161290322581	3.17358e+07	0.0125786163522013	0	0.00419287211740042	7.19968e+06	0.069060773480663	4.73027e+06	0.0649350649350649	1.63894e+07	0.0833333333333333	0	0.143884892086331	8.28809e+06	0.150214592274678	1.15441e+07	0.0647887323943662	2.00845e+07	0.225433526011561	1.21213e+07	0.0689655172413793	6.29548e+07	0.339285714285714	3.23235e+07
1	2	124101681	125102500	319274	0.319012409823944	0.148846960167715	722794	0.0884086444007859	7.57212e+06	0.0331325301204819	1.11068e+06	0.0659340659340659	1.32716e+06	0.00208768267223382	0	0.0766129032258065	2.80906e+06	0.0340909090909091	1.90982e+06	0.0875232774674116	457719	0.250645994832041	0	0.0201900237529691	0	0.0669975186104218	960769	0.0125786163522013	0	0.00209643605870021	0	0.069060773480663	0	0.051948051948052	0	0.0833333333333333	0	0.140287769784173	1.32716e+06	0.145922746781116	3.75103e+06	0.0704225352112676	0	0.173410404624277	7.0649e+06	0.0666666666666667	2.4858e+06	0.339285714285714	0
1	2	125102501	126103320	569364	0.568897504046682	0.144654088050314	387297	0.0825147347740668	3.45889e+07	0.0311244979919679	5.39775e+06	0.0659340659340659	5.18752e+06	0.00208768267223382	37132	0.0806451612903226	1.07046e+07	0.0340909090909091	642565	0.0875232774674116	3.22669e+07	0.242894056847545	8.93057e+06	0.0201900237529691	2.1445e+06	0.0645161290322581	1.07751e+07	0.0125786163522013	1.18672e+06	0	6.15542e+06	0.069060773480663	1.07094e+06	0.051948051948052	0	0.0833333333333333	0	0.140287769784173	669793	0.145922746781116	5.32226e+06	0.0676056338028169	7.41315e+06	0.167630057803468	1.57285e+07	0.0666666666666667	2.38863e+07	0.339285714285714	0
5	2	127104141	128104960	186613	0.186460102715773	0.138364779874214	3.15217e+07	0.0805500982318271	4.68007e+07	0.0281124497991968	1.39022e+07	0.0659340659340659	3.37732e+07	0.00208768267223382	1.13291e+06	0.0745967741935484	1.93106e+07	0.0340909090909091	2.61399e+07	0.0837988826815642	7.38357e+07	0.245478036175711	2.52985e+07	0.0190023752969121	1.76444e+07	0.0645161290322581	5.47482e+07	0.0125786163522013	3.62073e+06	0	5.07932e+06	0.069060773480663	8.1439e+06	0.0649350649350649	7.54744e+06	0.0694444444444444	8.50585e+06	0.143884892086331	1.14015e+07	0.145922746781116	9.74306e+06	0.0647887323943662	2.25446e+06	0.15606936416185	2.01454e+07	0.0574712643678161	6.94644e+07	0.321428571428571	1.44829e+07
11	2	128104961	129105780	476453	0.476062628644511	0.136268343815514	6.72706e+07	0.0844793713163065	6.15416e+07	0.0291164658634538	2.37605e+07	0.0622710622710623	5.9716e+07	0.00208768267223382	443730	0.0705645161290323	3.29415e+07	0.0340909090909091	2.81552e+07	0.0837988826815642	9.66342e+07	0.248062015503876	1.90804e+07	0.0178147268408551	1.78951e+07	0.0694789081885856	5.41006e+07	0.0125786163522013	1.41814e+06	0.00209643605870021	1.34286e+07	0.069060773480663	1.66372e+07	0.0649350649350649	59122.3	0.0694444444444444	1.66575e+06	0.140287769784173	1.60081e+07	0.133047210300429	1.36611e+07	0.0647887323943662	2.30941e+07	0.15606936416185	3.94519e+07	0.0574712643678161	8.46218e+07	0.357142857142857	4.08108e+07
8	2	130106601	131107420	102942	0.102857656721488	0.132075471698113	2.13118e+08	0.0805500982318271	2.56642e+08	0.034136546184739	4.82836e+07	0.0549450549450549	1.53808e+08	0.00208768267223382	0	0.0685483870967742	6.27421e+06	0.0397727272727273	4.17175e+07	0.0856610800744879	3.06231e+08	0.237726098191214	3.73623e+07	0.0190023752969121	3.08388e+07	0.0620347394540943	1.35337e+08	0.0125786163522013	0	0.00419287211740042	2.77549e+07	0.0718232044198895	1.78242e+07	0.0649350649350649	0	0.0694444444444444	7.77137e+06	0.136690647482014	5.32847e+07	0.120171673819742	5.71424e+07	0.076056338028169	8.88882e+07	0.15606936416185	1.3147e+08	0.0482758620689655	2.2437e+08	0.321428571428571	5.25092e+07
7	2	131107421	132108240	241661	0.241463000339721	0.125786163522013	1.1973e+07	0.0766208251473477	1.33137e+07	0.0311244979919679	2.39673e+07	0.0549450549450549	9.9104e+07	0.00208768267223382	3.49939e+06	0.0665322580645161	3.6023e+07	0.0397727272727273	4.06187e+07	0.0837988826815642	1.60349e+07	0.245478036175711	2.85381e+07	0.0213776722090261	2.17525e+07	0.0595533498759305	6.38585e+07	0.0125786163522013	0	0.00419287211740042	1.48494e+07	0.0718232044198895	2.27781e+07	0.0649350649350649	1.18229e+07	0.0763888888888889	1.33485e+07	0.136690647482014	2.6301e+07	0.120171673819742	4.13803e+07	0.0704225352112676	4.83666e+07	0.144508670520231	5.51737e+07	0.0528735632183908	8.40708e+07	0.321428571428571	5.59193e+06
3	2	132108241	133109060	20393	0.0203762914410184	0.125786163522013	3.8582e+08	0.0766208251473477	6.08949e+08	0.0301204819277108	8.68414e+07	0.0586080586080586	2.92132e+08	0.00208768267223382	1.03671e+07	0.0625	2.18913e+07	0.0397727272727273	2.4067e+08	0.0782122905027933	7.07742e+08	0.237726098191214	4.1381e+07	0.0190023752969121	7.17606e+07	0.0694789081885856	3.5026e+08	0.0125786163522013	0	0.00209643605870021	7.0556e+07	0.0718232044198895	8.99751e+07	0.0649350649350649	2.10156e+07	0.0694444444444444	0	0.133093525179856	8.27619e+07	0.124463519313305	2.90156e+08	0.0732394366197183	2.2435e+08	0.144508670520231	3.5793e+08	0.0528735632183908	5.60789e+08	0.321428571428571	2.65062e+08
3	2	133109061	134109880	931472	0.93070881876861	0.117400419287212	1.27098e+07	0.0785854616895874	1.99243e+07	0.0301204819277108	4.05599e+06	0.0586080586080586	7.76625e+06	0.00208768267223382	45394.1	0.0604838709677419	7.42872e+06	0.0397727272727273	5.92768e+06	0.0819366852886406	2.21424e+07	0.237726098191214	4.12911e+06	0.0201900237529691	1.44544e+06	0.0694789081885856	1.08373e+07	0.0125786163522013	0	0.00628930817610063	182403	0.069060773480663	1.63654e+06	0.0649350649350649	3.06734e+06	0.0694444444444444	0	0.140287769784173	3.19787e+06	0.120171673819742	3.17624e+06	0.0732394366197183	3.85924e+06	0.15028901734104	1.13007e+06	0.0505747126436782	1.92619e+06	0.321428571428571	1.74092e+07
2	2	134109881	135110700	263943	0.263726744069863	0.113207547169811	1.151e+07	0.0825147347740668	7.47769e+06	0.0291164658634538	2.2525e+06	0.0622710622710623	322442	0.00208768267223382	0	0.0725806451612903	3.42095e+06	0.0340909090909091	4.62036e+06	0.0819366852886406	8.66438e+06	0.242894056847545	1.63306e+06	0.0201900237529691	463733	0.0620347394540943	4.73587e+06	0.0125786163522013	0	0.00209643605870021	0	0.0718232044198895	3.47587e+06	0.0649350649350649	0	0.0694444444444444	0	0.140287769784173	0	0.111587982832618	0	0.0704225352112676	2.48439e+06	0.15606936416185	0	0.0505747126436782	1.00496e+07	0.303571428571429	1.99405e+07
7	2	135110701	136111520	786790	0.786145360804141	0.111111111111111	2.29036e+06	0.0805500982318271	1.66869e+07	0.0281124497991968	7.24553e+06	0.0549450549450549	1.67662e+07	0.00208768267223382	1.34354e+06	0.0625	1.1684e+07	0.0340909090909091	7.01772e+06	0.0800744878957169	3.27656e+07	0.245478036175711	994686	0.0190023752969121	637047	0.0669975186104218	2.17194e+07	0.0125786163522013	858775	0.00209643605870021	2.17528e+06	0.0773480662983425	3.91073e+06	0.0649350649350649	18157	0.0763888888888889	3.05037e+06	0.143884892086331	6.51788e+06	0.11587982832618	8.91921e+06	0.0732394366197183	7.10749e+06	0.15028901734104	1.42275e+07	0.0459770114942529	2.09578e+07	0.339285714285714	1.37404e+07
6	2	136111521	137112340	396391	0.39606622569493	0.115303983228512	7.93966e+07	0.0805500982318271	4.43562e+07	0.0291164658634538	1.91754e+07	0.0549450549450549	4.18671e+07	0.00208768267223382	1.06671e+06	0.0625	2.94134e+07	0.0340909090909091	3.86927e+07	0.0837988826815642	7.21541e+07	0.250645994832041	1.0921e+07	0.0190023752969121	1.69416e+07	0.0521091811414392	4.28393e+07	0.0125786163522013	3.40914e+06	0	7.92172e+06	0.074585635359116	1.00601e+07	0.0649350649350649	3.65618e+06	0.0625	6.00658e+06	0.143884892086331	1.50934e+07	0.120171673819742	1.62283e+07	0.0732394366197183	1.07881e+07	0.15606936416185	3.24901e+07	0.0459770114942529	6.34027e+07	0.303571428571429	3.31942e+07
2	2	139113981	140114800	128184	0.128078975240303	0.119496855345912	4.98803e+07	0.0825147347740668	3.44428e+07	0.0321285140562249	7.46535e+06	0.0549450549450549	2.66711e+07	0.00208768267223382	0	0.0564516129032258	1.56722e+07	0.0284090909090909	1.43582e+07	0.0837988826815642	5.07002e+07	0.253229974160207	9.87505e+06	0.0201900237529691	3.81481e+06	0.0496277915632754	2.6901e+06	0.0125786163522013	0	0	3.79625e+06	0.0773480662983425	2.4004e+06	0.0649350649350649	0	0.0625	0	0.140287769784173	9.91689e+06	0.133047210300429	0	0.0732394366197183	7.69864e+06	0.15606936416185	2.34625e+07	0.0459770114942529	4.52845e+07	0.303571428571429	0
1	2	140114801	141115620	124867	0.12476469295178	0.117400419287212	9.19346e+07	0.0864440078585462	1.05234e+08	0.034136546184739	9.59104e+06	0.0549450549450549	3.09342e+06	0.00208768267223382	0	0.0564516129032258	4.3192e+06	0.0284090909090909	1.47396e+07	0.0837988826815642	7.7231e+06	0.258397932816537	6.81576e+06	0.0213776722090261	1.07958e+07	0.0521091811414392	2.51051e+07	0.0125786163522013	5.41116e+06	0	9.57957e+06	0.0773480662983425	4.94353e+06	0.0779220779220779	0	0.0694444444444444	6.40682e+06	0.136690647482014	3.39344e+06	0.128755364806867	9.59104e+06	0.0704225352112676	1.05723e+07	0.15028901734104	9.7073e+07	0.0459770114942529	7.88073e+07	0.285714285714286	63225.2
1	2	141115621	142116440	1000820	1	0.090146750524109	4.94569e+06	0.0785854616895874	4.6525e+06	0.0301204819277108	5.27779e+06	0.0586080586080586	1.42125e+07	0.00208768267223382	633730	0.0483870967741935	2.09395e+07	0.0284090909090909	1.34859e+07	0.0782122905027933	3.19821e+06	0.248062015503876	3.30308e+06	0.0201900237529691	3.31831e+06	0.0521091811414392	1.27691e+07	0.0125786163522013	0	0	4.76936e+06	0.0773480662983425	3.39228e+06	0.0779220779220779	1.49131e+06	0.0694444444444444	1.61158e+06	0.133093525179856	3.843e+06	0.11587982832618	5.35275e+06	0.0676056338028169	819001	0.127167630057803	2.90806e+07	0.0413793103448276	4.08153e+07	0.25	1.24898e+07
1	2	142116441	143117260	771857	0.771224595831418	0.10062893081761	65268.4	0.0864440078585462	1.44596e+06	0.0291164658634538	465477	0.0622710622710623	0	0.00208768267223382	0	0.0564516129032258	863718	0.0284090909090909	0	0.0819366852886406	1.62625e+06	0.266149870801034	0	0.0201900237529691	317543	0.0620347394540943	1.25378e+06	0.0125786163522013	0	0.00209643605870021	0	0.0773480662983425	399869	0.0779220779220779	0	0.0694444444444444	0	0.140287769784173	0	0.11587982832618	1.54235e+06	0.076056338028169	433303	0.15606936416185	0	0.0528735632183908	1.03096e+06	0.303571428571429	3.50156e+06
2	2	143117261	144118080	361827	0.361530544953138	0.10272536687631	1.04953e+07	0.0864440078585462	1.53542e+06	0.0281124497991968	1.98118e+06	0.0622710622710623	1.20163e+06	0.00208768267223382	1.75291e+06	0.0604838709677419	1.16952e+07	0.0284090909090909	1.01733e+07	0.0819366852886406	1.5033e+07	0.266149870801034	2.33228e+06	0.0201900237529691	1.68933e+06	0.0595533498759305	713226	0.0125786163522013	1.8674e+06	0.00209643605870021	132237	0.074585635359116	1.70077e+06	0.0779220779220779	406434	0.0763888888888889	2.24695e+06	0.140287769784173	2.37232e+06	0.111587982832618	6.42733e+06	0.0732394366197183	2.75457e+06	0.15028901734104	20472.2	0.0505747126436782	1.53949e+07	0.303571428571429	2.24088e+07
2	2	144118081	145118900	669390	0.668841549929058	0.10062893081761	9.75913e+06	0.0825147347740668	4.96862e+06	0.0281124497991968	1.61212e+06	0.0622710622710623	2.59808e+06	0.00208768267223382	315835	0.0564516129032258	2.32384e+06	0.0284090909090909	1.833e+06	0.0819366852886406	1.15636e+07	0.263565891472868	0	0.0201900237529691	1.2784e+06	0.0645161290322581	4.83462e+06	0.0125786163522013	0	0.00419287211740042	1.78696e+06	0.074585635359116	0	0.0779220779220779	0	0.0625	0	0.140287769784173	641158	0.11587982832618	868545	0.0704225352112676	2.98779e+06	0.15606936416185	4.4594e+06	0.0528735632183908	8.74089e+06	0.303571428571429	0
1	2	145118901	146119720	127900	0.127795207929498	0.10482180293501	9.05934e+07	0.0844793713163065	7.12362e+07	0.0261044176706827	1.48926e+07	0.0659340659340659	5.75395e+07	0.00208768267223382	0	0.0584677419354839	1.91547e+07	0.0284090909090909	4.31702e+07	0.0819366852886406	8.66917e+07	0.268733850129199	1.97939e+07	0.0225653206650831	1.24257e+07	0.0645161290322581	5.83857e+07	0.0125786163522013	5.28284e+06	0	1.29386e+07	0.074585635359116	1.43901e+07	0.0779220779220779	0	0.0625	0	0.140287769784173	100669	0.124463519313305	1.37975e+07	0.0732394366197183	2.09896e+07	0.15606936416185	4.66783e+07	0.0528735632183908	6.44619e+07	0.303571428571429	0
2	2	148121361	149122180	122571	0.122470574129214	0.0985324947589098	1.8449e+07	0.0943025540275049	2.37805e+06	0.0301204819277108	1.17108e+07	0.0695970695970696	5.65093e+07	0.00208768267223382	1.72485e+06	0.0625	546331	0.0397727272727273	2.02697e+07	0.0800744878957169	7.83492e+07	0.286821705426357	0	0.0190023752969121	596966	0.0595533498759305	2.6403e+07	0.0125786163522013	0	0.00209643605870021	7.84475e+06	0.0801104972375691	1.00723e+07	0.0779220779220779	0	0.0694444444444444	6.57947e+06	0.140287769784173	2.45106e+07	0.0858369098712446	0	0.0704225352112676	2.77501e+07	0.15028901734104	3.54719e+06	0.0528735632183908	1.21737e+08	0.267857142857143	0
3	2	149122181	150123000	279305	0.279076157550808	0.106918238993711	3.7973e+09	0.0943025540275049	3.43646e+07	0.0291164658634538	1.66229e+07	0.0732600732600733	2.95765e+07	0.00208768267223382	1.51388e+06	0.0685483870967742	2.73552e+07	0.0397727272727273	2.44618e+07	0.0800744878957169	7.99778e+07	0.297157622739018	1.71232e+07	0.0190023752969121	829585	0.0645161290322581	2.77186e+07	0.0125786163522013	2.41913e+06	0	4.23205e+06	0.0773480662983425	771145	0.0779220779220779	5.26517e+06	0.0694444444444444	2.88735e+06	0.140287769784173	7.68308e+06	0.0772532188841202	1.02883e+07	0.0676056338028169	1.80824e+07	0.15028901734104	4.66998e+07	0.0528735632183908	5.34236e+07	0.267857142857143	5.65313e+07
2	2	150123001	151123820	50266	0.050224815651166	0.10272536687631	2.493e+07	0.0903732809430255	1.76837e+07	0.0281124497991968	1.41595e+07	0.0659340659340659	1.71501e+06	0.00208768267223382	0	0.0685483870967742	1.78824e+07	0.0397727272727273	0	0.0800744878957169	4.5496e+07	0.294573643410853	0	0.0190023752969121	7.27835e+06	0.0595533498759305	1.92524e+07	0.0188679245283019	0	0	4.68098e+06	0.0773480662983425	1.22426e+07	0.0779220779220779	0	0.0694444444444444	0	0.143884892086331	0	0.0815450643776824	1.15664e+07	0.0676056338028169	2.00277e+07	0.15028901734104	1.45213e+07	0.0505747126436782	1.03886e+07	0.267857142857143	5.10107e+07
2	2	151123821	152124640	28253	0.0282298515217522	0.10062893081761	8.00377e+07	0.0923379174852652	1.02478e+08	0.0301204819277108	3.3629e+07	0.0659340659340659	1.9748e+08	0.00208768267223382	7.48297e+06	0.0685483870967742	1.59435e+07	0.0397727272727273	2.19841e+06	0.0800744878957169	1.17736e+08	0.294573643410853	0	0.0190023752969121	3.02517e+07	0.0645161290322581	9.19337e+07	0.0188679245283019	0	0.00209643605870021	0	0.0773480662983425	3.26718e+07	0.0779220779220779	0	0.0694444444444444	0	0.140287769784173	0	0.0944206008583691	0	0.0704225352112676	1.18376e+07	0.15028901734104	1.03342e+08	0.0459770114942529	1.65052e+08	0.267857142857143	1.8151e+08
7	2	152124641	153125460	686031	0.685468915489299	0.10062893081761	5.0542e+07	0.0962671905697446	4.18342e+07	0.0281124497991968	2.05037e+07	0.0659340659340659	4.37924e+07	0.00208768267223382	1.54087e+06	0.0685483870967742	2.69207e+06	0.0397727272727273	1.82208e+07	0.0800744878957169	1.01733e+07	0.315245478036176	1.69641e+07	0.0201900237529691	1.17467e+07	0.0595533498759305	4.32596e+06	0.0125786163522013	1.96981e+06	0.00838574423480084	7.1354e+06	0.0801104972375691	1.03476e+07	0.0909090909090909	4.35122e+06	0.0694444444444444	5.87766e+06	0.147482014388489	1.45135e+07	0.0901287553648069	1.45766e+07	0.0732394366197183	1.4233e+07	0.161849710982659	2.48342e+07	0.0505747126436782	6.64633e+07	0.267857142857143	4.48511e+07
3	2	153125461	154126280	414652	0.414312263943566	0.10272536687631	1.57151e+07	0.0962671905697446	8.63234e+06	0.0301204819277108	7.66959e+06	0.0659340659340659	9.31543e+06	0.00208768267223382	0	0.0665322580645161	8.07476e+06	0.0397727272727273	2.97736e+06	0.0800744878957169	1.79751e+07	0.30749354005168	1.01758e+06	0.0190023752969121	3.23515e+06	0.0570719602977667	1.62323e+07	0.0125786163522013	0	0.00628930817610063	2.21762e+06	0.0828729281767956	2.98658e+06	0.0779220779220779	0	0.0694444444444444	0	0.147482014388489	1.04401e+06	0.0944206008583691	1.27676e+07	0.0816901408450704	9.74408e+06	0.161849710982659	8.93208e+06	0.0482758620689655	2.3117e+07	0.285714285714286	1.2693e+07
2	2	154126281	155127100	326421	0.32615355408565	0.109014675052411	2.03193e+07	0.100196463654224	2.07462e+07	0.0301204819277108	3.23233e+06	0.0622710622710623	6.5741e+08	0.00208768267223382	0	0.0645161290322581	4.80823e+06	0.0397727272727273	3.78213e+06	0.0819366852886406	1.46185e+06	0.317829457364341	3.96146e+06	0.0190023752969121	1.1208e+06	0.0595533498759305	1.37027e+07	0.0125786163522013	0	0.00419287211740042	1.39887e+06	0.0828729281767956	1.89692e+06	0.0779220779220779	0	0.0625	0	0.143884892086331	2.62964e+06	0.0901287553648069	1.78112e+06	0.0788732394366197	308409	0.161849710982659	4.53856e+06	0.0482758620689655	1.27315e+07	0.267857142857143	0
2	2	155127101	156127920	336500	0.336224296077217	0.113207547169811	2.87347e+07	0.100196463654224	3.46484e+07	0.0321285140562249	1.04517e+06	0.0659340659340659	1.02035e+07	0.00208768267223382	0	0.0745967741935484	1.20477e+07	0.0397727272727273	0	0.0856610800744879	2.22883e+07	0.330749354005168	5.19086e+06	0.0178147268408551	2.17182e+06	0.0620347394540943	1.03776e+07	0.00628930817610063	0	0.00838574423480084	681598	0.0828729281767956	3.68021e+06	0.0779220779220779	4.37025e+06	0.0763888888888889	0	0.147482014388489	1.28648e+06	0.0987124463519313	5.21363e+06	0.0816901408450704	7.9779e+06	0.167630057803468	6.60393e+06	0.0551724137931034	2.47647e+07	0.267857142857143	7.42942e+06
3	2	157128741	158129560	126223	0.126119581942807	0.123689727463312	5.28166e+07	0.0982318271119843	5.49434e+07	0.0311244979919679	1.47224e+07	0.0695970695970696	4.43932e+07	0.00208768267223382	3.34989e+06	0.0725806451612903	2.16068e+07	0.0454545454545455	2.93425e+07	0.0837988826815642	8.08754e+07	0.338501291989664	1.04702e+07	0.0178147268408551	676310	0.0645161290322581	5.06229e+07	0.0125786163522013	0	0.010482180293501	7.26834e+06	0.0828729281767956	1.22639e+06	0.0779220779220779	2.33014e+07	0.0694444444444444	6.3891e+06	0.147482014388489	1.02006e+07	0.0901287553648069	2.30305e+07	0.0873239436619718	1.6005e+07	0.161849710982659	5.28166e+07	0.0574712643678161	8.87153e+07	0.25	1.98062e+07
7	2	158129561	159130380	364126	0.363827661317719	0.123689727463312	3.37142e+07	0.0962671905697446	3.1735e+06	0.034136546184739	8.01138e+06	0.0659340659340659	2.22041e+07	0.00208768267223382	1.16123e+06	0.0705645161290323	2.05041e+07	0.0454545454545455	1.02347e+07	0.0837988826815642	4.58673e+07	0.348837209302326	7.35617e+06	0.0178147268408551	7.35915e+06	0.0620347394540943	2.1796e+07	0.0125786163522013	0	0.00628930817610063	6.92874e+06	0.0856353591160221	8.50248e+06	0.0779220779220779	3.98015e+06	0.0763888888888889	0	0.151079136690647	4.7555e+06	0.0858369098712446	1.62503e+06	0.0901408450704225	9.27805e+06	0.184971098265896	1.43464e+07	0.0620689655172414	4.16978e+07	0.25	2.05973e+06
5	2	159130381	160131200	554271	0.553816870166464	0.132075471698113	1.55046e+07	0.102161100196464	1.94171e+07	0.0381526104417671	8.01854e+06	0.0732600732600733	1.78094e+07	0.00208768267223382	1.52573e+06	0.0725806451612903	1.47279e+06	0.0454545454545455	1.22505e+07	0.0856610800744879	3.13277e+07	0.359173126614987	1.0565e+07	0.0178147268408551	6.82065e+06	0.0818858560794045	2.22593e+07	0.0125786163522013	1.21903e+06	0.00838574423480084	2.48851e+06	0.0856353591160221	3.92211e+06	0.0779220779220779	1.0459e+07	0.0763888888888889	0	0.147482014388489	5.44362e+06	0.0858369098712446	8.54046e+06	0.0845070422535211	7.26512e+06	0.173410404624277	1.62782e+07	0.0551724137931034	2.8117e+07	0.267857142857143	9.25216e+06
6	2	160131201	161132020	511775	0.511355688335565	0.127882599580713	3.29039e+06	0.100196463654224	3.44564e+07	0.036144578313253	1.65861e+07	0.0659340659340659	3.47743e+07	0.00208768267223382	2.89173e+06	0.0766129032258065	2.2154e+07	0.0454545454545455	1.20616e+07	0.0856610800744879	5.72296e+07	0.341085271317829	1.2051e+07	0.0201900237529691	1.19437e+07	0.086848635235732	5.67286e+07	0.0125786163522013	0	0.00419287211740042	8.01178e+06	0.0828729281767956	1.08891e+07	0.0779220779220779	1.13274e+07	0.0763888888888889	0	0.143884892086331	1.26335e+07	0.0858369098712446	5.78102e+06	0.0873239436619718	2.63163e+07	0.184971098265896	2.38654e+07	0.0551724137931034	4.33652e+07	0.25	1.95398e+07
2	2	161132021	162132840	273583	0.273358845746488	0.119496855345912	8.43507e+06	0.102161100196464	328557	0.0321285140562249	3.82076e+06	0.0659340659340659	1.23905e+07	0.00208768267223382	0	0.0745967741935484	745959	0.0454545454545455	4.51259e+06	0.0856610800744879	2.06465e+07	0.348837209302326	4.85203e+06	0.0213776722090261	2.2397e+06	0.0794044665012407	7.09747e+06	0.0125786163522013	2.46973e+06	0.00419287211740042	1.67286e+06	0.0801104972375691	2.25629e+06	0.0779220779220779	0	0.0763888888888889	0	0.151079136690647	1.58234e+06	0.0944206008583691	2.18874e+06	0.0873239436619718	2.46141e+06	0.173410404624277	824481	0.0551724137931034	1.523e+07	0.25	0
7	2	162132841	163133660	622423	0.621913031314322	0.125786163522013	4.55486e+07	0.102161100196464	2.88831e+07	0.0321285140562249	8.74987e+06	0.0695970695970696	2.54039e+07	0.00208768267223382	339667	0.0766129032258065	1.64688e+07	0.0454545454545455	1.28927e+07	0.0856610800744879	3.76448e+07	0.34625322997416	8.49317e+06	0.0190023752969121	6.48149e+06	0.0769230769230769	2.12489e+07	0.0125786163522013	0	0.00838574423480084	2.57944e+06	0.0828729281767956	4.97407e+06	0.0779220779220779	0	0.0833333333333333	1.29566e+06	0.158273381294964	4.88973e+06	0.0987124463519313	5.7723e+06	0.0845070422535211	1.2896e+07	0.173410404624277	2.41598e+07	0.0528735632183908	2.8794e+07	0.25	1.20497e+07
3	2	163133661	164134480	523841	0.523411802322096	0.127882599580713	3.30495e+06	0.0982318271119843	2.26344e+07	0.0321285140562249	4.38845e+06	0.0695970695970696	8.15802e+06	0.00208768267223382	0	0.0766129032258065	9.97874e+06	0.0397727272727273	1.05404e+06	0.0856610800744879	2.51076e+07	0.343669250645995	8.40959e+06	0.0201900237529691	3.96731e+06	0.0769230769230769	1.30157e+07	0.0125786163522013	0	0.010482180293501	3.05088e+06	0.0856353591160221	7.1142e+06	0.0779220779220779	2.76663e+06	0.0833333333333333	0	0.154676258992806	4.95838e+06	0.0944206008583691	5.5818e+06	0.0816901408450704	3.83072e+06	0.179190751445087	4.27383e+06	0.0505747126436782	1.62781e+07	0.25	95448.8
1	2	164134481	165135300	125376	0.125273275913751	0.125786163522013	5.56466e+07	0.0962671905697446	3.56072e+07	0.0331325301204819	6.43226e+06	0.0695970695970696	2.04513e+07	0.00208768267223382	0	0.0846774193548387	2.74404e+07	0.0397727272727273	1.46798e+07	0.0819366852886406	4.97464e+07	0.366925064599483	1.07301e+07	0.0201900237529691	5.85037e+06	0.0744416873449131	3.10754e+07	0.0125786163522013	5.38919e+06	0.00838574423480084	7.30069e+06	0.0856353591160221	495404	0.0779220779220779	0	0.0833333333333333	0	0.151079136690647	3.45282e+06	0.0944206008583691	4.71953e+06	0.0816901408450704	1.33378e+07	0.167630057803468	7.08979e+07	0.0505747126436782	6.18295e+07	0.25	1.994e+07
4	2	165135301	166136120	424101	0.423753522111868	0.129979035639413	3.42971e+07	0.0982318271119843	3.52637e+07	0.036144578313253	1.12152e+07	0.0732600732600733	3.12375e+06	0.00208768267223382	1.99402e+06	0.0846774193548387	2.05508e+07	0.0397727272727273	8.67949e+06	0.0837988826815642	6.61789e+07	0.361757105943152	1.83036e+07	0.0201900237529691	1.00889e+07	0.0769230769230769	3.62166e+07	0.0125786163522013	0	0.00628930817610063	7.55401e+06	0.0883977900552486	7.34557e+06	0.0779220779220779	3.41729e+06	0.0833333333333333	3.80311e+06	0.154676258992806	410075	0.0987124463519313	1.53475e+07	0.0845070422535211	1.266e+07	0.184971098265896	3.39399e+07	0.0597701149425287	5.08816e+07	0.285714285714286	3.72305e+07
6	2	166136121	167136940	443697	0.443333466557423	0.127882599580713	1.08623e+08	0.0982318271119843	7.22819e+07	0.036144578313253	2.54503e+07	0.0769230769230769	4.85731e+07	0.00208768267223382	4.2884e+06	0.0887096774193548	3.94673e+07	0.0397727272727273	2.62712e+07	0.0837988826815642	1.30062e+08	0.359173126614987	1.74952e+07	0.0190023752969121	1.3209e+07	0.0694789081885856	6.34562e+07	0.0125786163522013	1.52283e+06	0.00419287211740042	1.38932e+07	0.0883977900552486	9.82962e+06	0.0779220779220779	6.53273e+06	0.0833333333333333	7.27029e+06	0.158273381294964	1.77154e+07	0.0987124463519313	3.5089e+07	0.0929577464788732	1.96639e+07	0.173410404624277	7.23231e+06	0.0551724137931034	1.0266e+08	0.267857142857143	4.62316e+07
3	2	167136941	168137760	459323	0.458946663735737	0.125786163522013	1.16711e+08	0.0962671905697446	119766	0.03714859437751	2.37964e+07	0.0805860805860806	5.18361e+07	0.00208768267223382	184111	0.0887096774193548	4.57547e+07	0.0397727272727273	3.33914e+07	0.0875232774674116	1.259e+08	0.366925064599483	1.11387e+07	0.0201900237529691	1.43722e+07	0.0769230769230769	6.43239e+07	0.0125786163522013	1.47103e+06	0.00628930817610063	1.44147e+07	0.0856353591160221	1.35225e+07	0.0779220779220779	3.15524e+06	0.0902777777777778	1.75574e+06	0.154676258992806	1.04123e+07	0.0901287553648069	2.46222e+06	0.0816901408450704	3.54414e+06	0.173410404624277	4.5492e+07	0.0574712643678161	8.25013e+07	0.25	5.98707e+07
2	2	168137761	169138580	292921	0.292681001578705	0.129979035639413	1.40779e+07	0.100196463654224	6.08265e+06	0.040160642570281103	1.98945e+06	0.0805860805860806	2.06011e+07	0.00208768267223382	0	0.092741935483871	3.14644e+06	0.0397727272727273	2.09441e+06	0.0856610800744879	2.76802e+07	0.364341085271318	1.5805e+06	0.0190023752969121	2.08418e+06	0.0769230769230769	8.86725e+06	0.0125786163522013	0	0.00628930817610063	7812.1	0.0856353591160221	1.06021e+06	0.0779220779220779	0	0.0902777777777778	0	0.161870503597122	0	0.103004291845494	0	0.0901408450704225	1.1456e+07	0.167630057803468	2.54768e+06	0.064367816091954	1.16484e+07	0.267857142857143	0
7	2	169138581	170139400	663294	0.662750544553466	0.127882599580713	5.46466e+07	0.0982318271119843	4.32186e+07	0.0411646586345382	1.44591e+07	0.0842490842490843	3.27745e+07	0.00208768267223382	2.5553e+06	0.092741935483871	2.43727e+07	0.0397727272727273	1.10991e+07	0.0856610800744879	6.89559e+07	0.372093023255814	1.88453e+07	0.0190023752969121	1.67514e+07	0.0744416873449131	3.59885e+07	0.0125786163522013	0	0.00419287211740042	4.49522e+06	0.0911602209944751	1.13072e+07	0.0779220779220779	2.18497e+06	0.0902777777777778	1.21583e+06	0.154676258992806	1.76982e+07	0.0858369098712446	1.15289e+07	0.0901408450704225	1.67514e+07	0.179190751445087	2.62693e+07	0.0597701149425287	5.13067e+07	0.303571428571429	4.48213e+07
11	2	170139401	171140220	627489	0.62697488059791	0.136268343815514	2.51847e+07	0.0962671905697446	1.98321e+07	0.0421686746987952	1.21013e+07	0.0879120879120879	3.27082e+07	0.00208768267223382	1.3477e+06	0.092741935483871	1.20898e+07	0.0397727272727273	1.56432e+07	0.0875232774674116	6.97223e+07	0.374677002583979	6.67111e+06	0.0201900237529691	1.11049e+06	0.0694789081885856	3.60348e+07	0.0125786163522013	0	0.00419287211740042	5.11724e+06	0.0856353591160221	8.90862e+06	0.0779220779220779	230964	0.0902777777777778	1.29565e+06	0.154676258992806	9.00761e+06	0.0901287553648069	7.58883e+06	0.0929577464788732	1.49238e+07	0.167630057803468	1.78394e+07	0.064367816091954	3.60669e+07	0.285714285714286	3.35506e+07
5	2	171140221	172141040	616032	0.615527267640535	0.138364779874214	1.88755e+07	0.102161100196464	1.34067e+07	0.0411646586345382	5.48665e+06	0.0952380952380952	1.63753e+07	0.00208768267223382	1.02957e+06	0.0967741935483871	8.62257e+06	0.0397727272727273	1.09547e+07	0.0912476722532588	3.74344e+07	0.385012919896641	4.616e+06	0.0190023752969121	5.35151e+06	0.0744416873449131	1.46149e+07	0.0125786163522013	1.09682e+06	0.00838574423480084	2.6062e+06	0.0883977900552486	202279	0.0779220779220779	0	0.0902777777777778	1.31975e+06	0.158273381294964	7.79747e+06	0.0901287553648069	1.18058e+07	0.0873239436619718	1.29863e+07	0.196531791907514	998949	0.064367816091954	2.73397e+06	0.285714285714286	2.08114e+07
8	2	172141041	173141860	399584	0.399256609580144	0.150943396226415	2.483e+07	0.0962671905697446	2.72506e+07	0.0431726907630522	1.23513e+07	0.0952380952380952	3.18314e+06	0.00208768267223382	1.05818e+06	0.112903225806452	1.05993e+07	0.0397727272727273	7.72408e+06	0.0912476722532588	5.15242e+07	0.403100775193798	1.08286e+07	0.0190023752969121	7.02807e+06	0.0719602977667494	2.88762e+07	0.0125786163522013	1.69095e+06	0.00628930817610063	2.30124e+06	0.0883977900552486	5.45739e+06	0.0779220779220779	0	0.0902777777777778	4.06927e+06	0.161870503597122	8.70471e+06	0.0815450643776824	1.50759e+07	0.0929577464788732	1.00439e+07	0.196531791907514	1.52831e+06	0.064367816091954	3.79976e+07	0.321428571428571	1.35276e+07
3	2	173141861	174142680	429694	0.42934193960952	0.157232704402516	1.83247e+06	0.0962671905697446	2.42528e+07	0.036144578313253	809943	0.0952380952380952	2.85801e+07	0.00208768267223382	492016	0.110887096774194	7.66619e+06	0.0454545454545455	1.0056e+07	0.0912476722532588	4.0007e+07	0.390180878552972	9.97388e+06	0.0166270783847981	7.38806e+06	0.0694789081885856	2.6597e+07	0.0125786163522013	0	0.00838574423480084	321738	0.0883977900552486	4.34998e+06	0.0779220779220779	0	0.0972222222222222	3.78413e+06	0.161870503597122	7.0829e+06	0.0772532188841202	4.18067e+06	0.0901408450704225	9.30895e+06	0.208092485549133	1.44325e+07	0.0758620689655172	3.10298e+07	0.321428571428571	1.25797e+07
3	2	174142681	175143500	239322	0.239125916748266	0.163522012578616	1.1113e+07	0.102161100196464	1.67885e+07	0.0381526104417671	1.22178e+07	0.0952380952380952	1.46613e+07	0.00208768267223382	1.7668e+06	0.120967741935484	8.95387e+06	0.0454545454545455	0	0.0893854748603352	4.02112e+07	0.403100775193798	3.99854e+06	0.0166270783847981	5.61211e+06	0.0694789081885856	1.59687e+06	0.0125786163522013	0	0.00838574423480084	482502	0.0883977900552486	1.3017e+06	0.0779220779220779	0	0.0972222222222222	0	0.169064748201439	9.1233e+06	0.0815450643776824	1.25104e+07	0.0901408450704225	1.11426e+07	0.213872832369942	1.63222e+07	0.0758620689655172	2.00033e+07	0.303571428571429	219920
8	2	175143501	176144320	430957	0.430603904798066	0.163522012578616	2.63963e+06	0.104125736738703	2.95892e+07	0.036144578313253	1.40304e+07	0.0989010989010989	3.49089e+07	0.00208768267223382	1.47172e+06	0.131048387096774	2.28695e+07	0.0397727272727273	1.42357e+07	0.0912476722532588	6.27534e+07	0.403100775193798	6.72585e+06	0.0166270783847981	594979	0.0694789081885856	3.02984e+07	0.0125786163522013	0	0.00838574423480084	3.70843e+06	0.0883977900552486	1.0877e+07	0.0779220779220779	3.36292e+06	0.0972222222222222	1.88652e+06	0.165467625899281	9.15954e+06	0.0772532188841202	1.11158e+07	0.0957746478873239	1.4696e+06	0.202312138728324	2.32042e+07	0.071264367816092	4.29707e+07	0.285714285714286	4.75983e+07
11	2	176144321	177145140	29901	0.0298765012689595	0.157232704402516	7.30481e+08	0.100196463654224	7.00158e+08	0.0381526104417671	1.08886e+08	0.0952380952380952	5.03135e+08	0.00417536534446764	2.12566e+07	0.131048387096774	2.4922e+08	0.0397727272727273	3.07764e+08	0.0912476722532588	9.86519e+07	0.405684754521964	9.69383e+07	0.0166270783847981	1.26743e+08	0.0719602977667494	3.34437e+08	0.0125786163522013	2.25971e+07	0.00838574423480084	1.37754e+08	0.0883977900552486	5.22558e+07	0.0779220779220779	4.84691e+07	0.0972222222222222	2.719e+07	0.165467625899281	1.60647e+07	0.0772532188841202	1.39349e+08	0.101408450704225	1.78963e+08	0.202312138728324	3.34437e+08	0.0666666666666667	1.17933e+09	0.285714285714286	4.28765e+08
3	2	177145141	178145960	97543	0.0974630802741752	0.165618448637317	1.65441e+08	0.0962671905697446	4.31898e+07	0.0411646586345382	1.6728e+07	0.102564102564103	1.32725e+07	0.00208768267223382	0	0.137096774193548	7.63963e+07	0.0397727272727273	6.2895e+06	0.0931098696461825	6.87758e+07	0.405684754521964	0	0.0154394299287411	2.50657e+06	0.0769230769230769	1.16122e+07	0.0125786163522013	1.38539e+06	0.00838574423480084	4.67056e+06	0.0883977900552486	2.2426e+07	0.0779220779220779	0	0.0902777777777778	8.20151e+06	0.169064748201439	4.06463e+07	0.0858369098712446	2.45554e+07	0.104225352112676	4.81632e+07	0.202312138728324	1.57721e+08	0.0620689655172414	2.69078e+07	0.285714285714286	5.25738e+07
5	2	178145961	179146780	606062	0.605565436342199	0.163522012578616	2.15026e+07	0.100196463654224	1.1e+07	0.040160642570281103	5.18022e+06	0.0989010989010989	1.90666e+07	0.00208768267223382	0	0.122983870967742	9.07893e+06	0.0340909090909091	8.04876e+06	0.0912476722532588	3.58995e+07	0.408268733850129	8.98513e+06	0.0154394299287411	5.85678e+06	0.0669975186104218	2.27403e+07	0.0125786163522013	0	0.00838574423480084	3.35972e+06	0.0883977900552486	3.10344e+06	0.0779220779220779	2.3913e+06	0.0902777777777778	0	0.165467625899281	4.3421e+06	0.0815450643776824	8.8922e+06	0.0957746478873239	6.00992e+06	0.208092485549133	1.14231e+07	0.0620689655172414	2.6921e+07	0.285714285714286	1.26923e+07
6	2	179146781	180147600	503631	0.503218360944026	0.153039832285115	5.35426e+08	0.0943025540275049	3.24033e+08	0.0431726907630522	9.32621e+07	0.102564102564103	2.59721e+08	0.00208768267223382	1.63716e+07	0.11491935483871	2.0985e+08	0.0340909090909091	1.58604e+08	0.0931098696461825	5.85268e+07	0.41343669250646	1.34002e+08	0.0142517814726841	9.9279e+07	0.0669975186104218	2.94019e+08	0.0125786163522013	1.07329e+07	0.00838574423480084	4.70388e+07	0.0883977900552486	7.68008e+07	0.0779220779220779	3.16542e+06	0.0902777777777778	1.28102e+07	0.165467625899281	6.53152e+07	0.0944206008583691	8.71718e+07	0.0957746478873239	1.08484e+08	0.196531791907514	2.30388e+08	0.0597701149425287	4.59296e+08	0.285714285714286	239288
2	2	180147601	181148420	374719	0.374411982174617	0.153039832285115	1.83075e+07	0.0884086444007859	4.7233e+06	0.0421686746987952	3.11033e+06	0.102564102564103	9.53095e+06	0.00208768267223382	1.1284e+06	0.108870967741935	7.58862e+06	0.0340909090909091	1.13906e+07	0.0931098696461825	2.73566e+06	0.392764857881137	0	0.0154394299287411	3.58429e+06	0.0669975186104218	1.11912e+07	0.00628930817610063	0	0.00419287211740042	0	0.0883977900552486	2.50972e+06	0.0779220779220779	3.86763e+06	0.0902777777777778	2.15215e+06	0.161870503597122	6.96174e+06	0.0772532188841202	7.94246e+06	0.0901408450704225	9.68823e+06	0.196531791907514	1.80586e+07	0.0597701149425287	1.89616e+07	0.285714285714286	1.36855e+07
1	2	181148421	182149240	80846	0.080779760596311	0.150943396226415	1.30546e+07	0.0864440078585462	8.17348e+06	0.0421686746987952	4.32489e+06	0.102564102564103	1.66402e+07	0.00208768267223382	0	0.104838709677419	0	0.0340909090909091	7.54219e+06	0.0931098696461825	1.55262e+07	0.390180878552972	0	0.0154394299287411	0	0.0669975186104218	3.92673e+06	0.0125786163522013	0	0.00628930817610063	0	0.0883977900552486	0	0.0779220779220779	0	0.0902777777777778	0	0.158273381294964	0	0.0772532188841202	7.31905e+06	0.0901408450704225	4.06881e+06	0.184971098265896	2.81118e+07	0.0597701149425287	6.54455e+06	0.285714285714286	0
5	2	182149241	183150060	467208	0.466825203333267	0.146750524109015	3.44493e+07	0.0844793713163065	4.77214e+07	0.0461847389558233	1.05018e+07	0.102564102564103	2.60316e+07	0.00208768267223382	905021	0.104838709677419	2.27162e+07	0.0340909090909091	1.04409e+06	0.0949720670391061	5.21716e+07	0.392764857881137	1.32499e+07	0.0154394299287411	65335	0.0694789081885856	3.22428e+07	0.0125786163522013	0	0.00628930817610063	4.3386e+06	0.0883977900552486	5.36771e+06	0.0779220779220779	0	0.0902777777777778	3.45222e+06	0.161870503597122	1.30853e+07	0.0858369098712446	8.91823e+06	0.0873239436619718	1.26733e+07	0.184971098265896	1.47049e+07	0.0574712643678161	4.43805e+07	0.285714285714286	4.39051e+07
6	2	183150061	184150880	493590	0.493185587817989	0.153039832285115	1.98836e+07	0.0923379174852652	2.65039e+07	0.0481927710843374	8.06593e+06	0.102564102564103	1.37509e+06	0.00208768267223382	214162	0.102822580645161	1.19456e+06	0.0340909090909091	8.64745e+06	0.0931098696461825	3.29221e+07	0.385012919896641	6.75324e+06	0.0154394299287411	4.45269e+06	0.0694789081885856	2.52438e+06	0.0125786163522013	1.3689e+06	0.00419287211740042	2.73165e+06	0.0883977900552486	5.09679e+06	0.0779220779220779	2.97937e+06	0.0902777777777778	0	0.165467625899281	4.42352e+06	0.0815450643776824	479520	0.0901408450704225	6.66438e+06	0.196531791907514	1.41347e+07	0.0597701149425287	2.59876e+07	0.25	2.96484e+07
1	2	185151701	186152520	340067	0.339788373533702	0.146750524109015	6.78599e+07	0.0864440078585462	6.49138e+07	0.0471887550200803	2.73544e+06	0.102564102564103	9.27215e+06	0.00208768267223382	62169.1	0.092741935483871	2.02079e+07	0.0340909090909091	9.07592e+06	0.0912476722532588	3.9208e+07	0.37984496124031	5.65499e+06	0.0166270783847981	3.94952e+06	0.0570719602977667	1.78503e+07	0.0125786163522013	0	0.00838574423480084	4.55402e+06	0.0883977900552486	3.71053e+06	0.0779220779220779	4.32441e+06	0.0972222222222222	0	0.165467625899281	3.85231e+06	0.0944206008583691	1.23259e+07	0.0929577464788732	7.66279e+06	0.190751445086705	3.393e+07	0.0620689655172414	2.87077e+07	0.25	7.35149e+06
1	2	186152521	187153340	94599	0.0945214923762515	0.153039832285115	9.04465e+07	0.0884086444007859	9.35481e+07	0.0461847389558233	1.47845e+07	0.106227106227106	1.29147e+08	0.00208768267223382	2.23487e+06	0.0866935483870968	3.19586e+07	0.0340909090909091	3.91516e+07	0.0912476722532588	1.23328e+08	0.395348837209302	1.56221e+07	0.0166270783847981	1.28914e+07	0.054590570719603	6.37612e+07	0.0125786163522013	0	0.00838574423480084	2.37017e+06	0.0883977900552486	3.33468e+06	0.0779220779220779	3.1555e+07	0.111111111111111	0	0.158273381294964	1.37285e+07	0.0987124463519313	5.15655e+07	0.0957746478873239	3.82501e+07	0.190751445086705	4.91671e+07	0.064367816091954	1.10981e+08	0.25	2.64273e+07
4	2	187153341	188154160	199102	0.198938870126496	0.142557651991614	4.10816e+07	0.0864440078585462	8.4078e+07	0.0481927710843374	2.28298e+07	0.10989010989011	4.77256e+07	0.00208768267223382	1.06185e+06	0.0887096774193548	2.01376e+07	0.0340909090909091	2.80764e+06	0.0912476722532588	9.62656e+07	0.385012919896641	2.66899e+07	0.0166270783847981	1.22801e+09	0.0570719602977667	5.45581e+07	0.0125786163522013	3.39362e+06	0.00628930817610063	663773	0.0883977900552486	7.92201e+06	0.0649350649350649	0	0.111111111111111	0	0.165467625899281	8.77302e+06	0.0987124463519313	1.52199e+07	0.0929577464788732	2.2979e+07	0.184971098265896	3.77635e+07	0.0597701149425287	6.62606e+07	0.267857142857143	5.15133e+07
2	2	188154161	189154980	76245	0.0761825303251334	0.146750524109015	5.88299e+07	0.0844793713163065	4.61208e+07	0.0491967871485944	1.5322e+07	0.10989010989011	4.15427e+07	0.00208768267223382	2.77286e+06	0.0887096774193548	2.16531e+07	0.0397727272727273	2.42882e+07	0.0912476722532588	8.19726e+07	0.385012919896641	12672.1	0.0166270783847981	4.81013e+06	0.0521091811414392	2.52223e+07	0.0125786163522013	8.8619e+06	0.00628930817610063	8.59101e+06	0.0856353591160221	4.13742e+06	0.0649350649350649	0	0.111111111111111	0	0.161870503597122	1.71073e+07	0.0987124463519313	1.58019e+07	0.0901408450704225	8.51663e+06	0.179190751445087	3.91511e+07	0.064367816091954	4.84482e+07	0.25	9.83671e+07
3	2	189154981	190155800	299129	0.298883915189545	0.146750524109015	7.16366e+07	0.0805500982318271	1.00218e+08	0.0461847389558233	1.24682e+07	0.106227106227106	3.26875e+07	0.00208768267223382	2.12032e+06	0.0887096774193548	2.76611e+07	0.0397727272727273	2.68269e+07	0.0949720670391061	8.18275e+07	0.372093023255814	9.37301e+06	0.0154394299287411	1.18229e+07	0.0620347394540943	3.78661e+07	0.0125786163522013	2.25881e+06	0.00838574423480084	6.51241e+06	0.0828729281767956	1.05127e+07	0.0649350649350649	491623	0.111111111111111	2.7402e+06	0.154676258992806	1.00868e+07	0.0944206008583691	2.4313e+07	0.0901408450704225	1.84518e+07	0.167630057803468	2.94974e+07	0.071264367816092	4.90312e+07	0.25	1.67152e+07
10	2	190155801	191156620	327164	0.326895945324834	0.148846960167715	4.75825e+07	0.0805500982318271	3.47794e+07	0.0491967871485944	2.26014e+07	0.113553113553114	4.26818e+07	0.00208768267223382	2.58484e+06	0.0887096774193548	2.6863e+07	0.0397727272727273	2.26413e+07	0.0949720670391061	9.42443e+07	0.377260981912145	1.28547e+07	0.0154394299287411	1.26891e+07	0.0595533498759305	4.64915e+07	0.0125786163522013	0	0.010482180293501	1.52497e+07	0.0883977900552486	1.06064e+06	0.0649350649350649	4.49496e+06	0.104166666666667	2.48502e+06	0.165467625899281	1.99342e+07	0.0901287553648069	1.09817e+07	0.0873239436619718	2.26778e+07	0.167630057803468	2.47223e+07	0.064367816091954	5.60105e+07	0.232142857142857	3.72753e+07
8	2	191156621	192157440	389888	0.389568553785896	0.153039832285115	3.00141e+07	0.0864440078585462	2.49123e+07	0.0572289156626506	1.4803e+07	0.113553113553114	3.466e+07	0.00208768267223382	1.0845e+06	0.092741935483871	1.70989e+07	0.0397727272727273	1.42491e+07	0.0949720670391061	5.87776e+07	0.369509043927649	9.54359e+06	0.0154394299287411	9.72005e+06	0.0496277915632754	2.71281e+07	0.0125786163522013	1.74479e+06	0.00838574423480084	5.51578e+06	0.0828729281767956	7.25898e+06	0.051948051948052	7.43432e+06	0.111111111111111	2.10233e+06	0.154676258992806	1.43719e+06	0.0901287553648069	1.39058e+07	0.0929577464788732	1.32379e+07	0.184971098265896	2.31414e+07	0.0758620689655172	4.7247e+07	0.267857142857143	6.57651e+06
3	2	192157441	193158260	382613	0.382299514398193	0.146750524109015	1.452e+06	0.0825147347740668	1.94874e+07	0.0471887550200803	609943	0.117216117216117	1.782e+07	0.00208768267223382	55256	0.0866935483870968	1.25053e+07	0.0397727272727273	1.452e+06	0.0931098696461825	3.36889e+06	0.359173126614987	1.331e+07	0.0142517814726841	7.97804e+06	0.0471464019851117	2.52116e+07	0.00628930817610063	1.76595e+06	0.010482180293501	4.48688e+06	0.0883977900552486	4.94689e+06	0.051948051948052	0	0.104166666666667	0	0.154676258992806	5.65716e+06	0.103004291845494	9.50403e+06	0.0901408450704225	1.18416e+07	0.184971098265896	1.37558e+07	0.0735632183908046	3.31887e+07	0.25	1.3068e+07
4	2	196160721	197161540	507268	0.506852381047541	0.142557651991614	6.32713e+07	0.0805500982318271	3.45093e+07	0.0522088353413655	1.08366e+07	0.113553113553114	3.34586e+07	0.00208768267223382	833549	0.0846774193548387	2.40523e+07	0.0454545454545455	1.22444e+07	0.0968342644320298	7.2324e+07	0.361757105943152	8.25214e+06	0.0166270783847981	1.03628e+07	0.0372208436724566	4.04378e+07	0.0125786163522013	2.66398e+06	0.0125786163522013	5.93523e+06	0.0856353591160221	1.30594e+07	0.038961038961039	0	0.111111111111111	1.61586e+06	0.151079136690647	5.92249e+06	0.0901287553648069	2.34684e+07	0.0873239436619718	2.34533e+06	0.15606936416185	2.60913e+07	0.0735632183908046	5.00659e+07	0.267857142857143	5.05473e+07
6	2	197161541	198162360	549605	0.549154693151616	0.140461215932914	3.53252e+07	0.0746561886051081	3.53569e+07	0.0532128514056225	9.78906e+06	0.10989010989011	2.49245e+07	0.00208768267223382	1.15401e+06	0.0826612903225806	1.82819e+07	0.0454545454545455	1.23546e+07	0.0986964618249535	4.72001e+07	0.354005167958656	1.01553e+07	0.0166270783847981	5.32533e+06	0.0397022332506203	2.39868e+06	0.0125786163522013	2.45877e+06	0.010482180293501	3.50651e+06	0.0828729281767956	4.0178e+06	0.038961038961039	0	0.111111111111111	1.49138e+06	0.161870503597122	1.41778e+07	0.0901287553648069	7.6266e+06	0.0901408450704225	1.23256e+07	0.161849710982659	2.00679e+07	0.0735632183908046	4.03264e+07	0.285714285714286	1.91525e+07
10	2	198162361	199163180	629759	0.629243020723007	0.134171907756813	3.11685e+07	0.0726915520628684	3.32112e+07	0.0512048192771084	1.23587e+07	0.0989010989010989	2.24773e+07	0.00208768267223382	3.02139e+06	0.0766129032258065	1.79835e+06	0.0454545454545455	1.76434e+07	0.0986964618249535	5.31518e+07	0.348837209302326	1.00592e+07	0.0166270783847981	8.72477e+06	0.032258064516129	3.5856e+07	0.0125786163522013	107291	0.010482180293501	4.07156e+06	0.0828729281767956	7.01285e+06	0.038961038961039	4.53688e+06	0.111111111111111	1.30156e+06	0.151079136690647	1.37481e+07	0.0987124463519313	1.14789e+07	0.0901408450704225	1.38302e+07	0.161849710982659	2.5877e+07	0.0804597701149425	3.52869e+07	0.267857142857143	2.50722e+06
3	2	200164001	201164820	193611	0.193452369057373	0.121593291404612	3.14272e+07	0.0766208251473477	2.93209e+07	0.0502008032128514	1.15862e+07	0.0952380952380952	2.3912e+07	0.00208768267223382	0	0.0685483870967742	1.13655e+07	0.0454545454545455	1.27531e+07	0.0968342644320298	3.12703e+07	0.317829457364341	229555	0.0166270783847981	2.52259e+06	0.0272952853598015	2.39437e+07	0.0125786163522013	0	0.010482180293501	3.31089e+06	0.0856353591160221	6.55872e+06	0.038961038961039	0	0.104166666666667	0	0.151079136690647	6.70779e+06	0.0858369098712446	1.23712e+07	0.104225352112676	1.68241e+06	0.15606936416185	3.08358e+07	0.0827586206896552	2.8924e+07	0.285714285714286	1.35921e+07
13	2	201164821	202165640	430396	0.430043364441158	0.121593291404612	6.65601e+07	0.0785854616895874	4.78955e+07	0.0491967871485944	2.45007e+07	0.0842490842490843	7.78296e+07	0.00208768267223382	4.43029e+06	0.0604838709677419	6.32113e+07	0.0454545454545455	3.44214e+07	0.0912476722532588	9.51597e+06	0.328165374677003	1.56989e+07	0.0166270783847981	1.90074e+07	0.032258064516129	5.42136e+07	0.0125786163522013	4.70968e+06	0.00838574423480084	1.04704e+07	0.0856353591160221	2.51583e+07	0.025974025974026	1.32768e+07	0.104166666666667	5.66693e+06	0.147482014388489	1.41427e+07	0.0901287553648069	1.85305e+07	0.0957746478873239	2.39839e+07	0.132947976878613	3.0527e+07	0.0827586206896552	8.7747e+07	0.267857142857143	5.50289e+07
9	2	202165641	203166460	352318	0.352029335944526	0.106918238993711	5.496e+07	0.0785854616895874	4.84444e+06	0.0411646586345382	1.78026e+07	0.0622710622710623	9.41431e+07	0.00208768267223382	2.40538e+06	0.0584677419354839	3.31846e+06	0.0454545454545455	2.64442e+07	0.0931098696461825	1.21559e+08	0.317829457364341	2.00945e+07	0.0178147268408551	1.87372e+07	0.0347394540942928	5.04806e+07	0.0125786163522013	7.6712e+06	0.00838574423480084	7.40438e+06	0.0801104972375691	1.35159e+07	0.025974025974026	1.62191e+07	0.104166666666667	230760	0.147482014388489	2.46813e+07	0.0901287553648069	2.10248e+07	0.104225352112676	2.23345e+07	0.144508670520231	3.75663e+07	0.0827586206896552	7.94737e+06	0.285714285714286	4.60272e+07
7	2	203166461	204167280	653657	0.653121440418857	0.106918238993711	1.99901e+07	0.0766208251473477	1.30843e+07	0.0481927710843374	1.05008e+07	0.0549450549450549	3.18396e+07	0.00208768267223382	1.61718e+06	0.0604838709677419	1.49535e+07	0.0454545454545455	950220	0.0912476722532588	6.07489e+06	0.315245478036176	5.48827e+06	0.0166270783847981	5.97745e+06	0.032258064516129	3.18502e+06	0.0125786163522013	0	0.00838574423480084	3.96507e+06	0.0828729281767956	6.2937e+06	0.025974025974026	0	0.111111111111111	1.25398e+06	0.147482014388489	9.97731e+06	0.0901287553648069	5.70132e+06	0.109859154929577	1.26226e+07	0.144508670520231	1.61037e+07	0.0758620689655172	3.56157e+07	0.285714285714286	2.01297e+07
5	2	204167281	205168100	210626	0.210453428188885	0.0922431865828092	3.57358e+06	0.0785854616895874	2.09152e+07	0.0461847389558233	1.46085e+07	0.0512820512820513	5.48735e+07	0.00208768267223382	4.02352e+06	0.0483870967741935	2.02285e+06	0.0511363636363636	1.18694e+07	0.0931098696461825	6.24443e+07	0.310077519379845	3.39125e+07	0.0190023752969121	9.87904e+06	0.0347394540942928	4.22745e+07	0.0125786163522013	0	0.00838574423480084	8.22122e+06	0.0773480662983425	1.19817e+07	0.025974025974026	6.8808e+06	0.104166666666667	0	0.143884892086331	2.07325e+07	0.0901287553648069	1.44749e+07	0.107042253521127	2.03699e+07	0.132947976878613	6.42553e+07	0.0781609195402299	5.87222e+07	0.267857142857143	2.49882e+07
1	2	205168101	206168920	758199	0.757577786215303	0.0838574423480084	7.12927e+06	0.0785854616895874	5.21769e+06	0.0471887550200803	1.0991e+06	0.0402930402930403	2.70547e+06	0.00208768267223382	0	0.0383064516129032	1.67801e+06	0.0511363636363636	4.94593e+06	0.0912476722532588	9.89186e+06	0.317829457364341	1.19359e+06	0.0178147268408551	644946	0.0272952853598015	6.75212e+06	0.0125786163522013	891159	0.00628930817610063	570959	0.0773480662983425	0	0.025974025974026	0	0.104166666666667	0	0.143884892086331	1.72784e+06	0.103004291845494	0	0.0957746478873239	1.72407e+06	0.115606936416185	984265	0.0735632183908046	1.0788e+07	0.267857142857143	0
7	2	206168921	207169740	538667	0.53822565496293	0.090146750524109	2.44805e+07	0.0766208251473477	3.10086e+07	0.0481927710843374	7.96563e+06	0.0366300366300366	2.04111e+07	0.00208768267223382	15732.5	0.030241935483871	1.22818e+07	0.0511363636363636	1.16757e+07	0.0949720670391061	3.53422e+07	0.320413436692506	5.08612e+06	0.0178147268408551	7.49845e+06	0.0248138957816377	2.385e+07	0.0125786163522013	0	0.010482180293501	3.20075e+06	0.074585635359116	4.72977e+06	0.025974025974026	269048	0.0972222222222222	0	0.143884892086331	3.22858e+06	0.0772532188841202	5.72974e+06	0.0929577464788732	6.63012e+06	0.104046242774566	831239	0.0804597701149425	3.29923e+07	0.267857142857143	9.77071e+06
7	2	207169741	208170560	412890	0.412551707599768	0.079664570230608	6.79731e+07	0.0766208251473477	6.69224e+07	0.0471887550200803	1.8497e+07	0.032967032967033	4.38013e+07	0.00208768267223382	3.07875e+06	0.0262096774193548	1.79175e+07	0.0511363636363636	3.02744e+07	0.0949720670391061	9.37367e+07	0.304909560723514	1.62184e+07	0.0178147268408551	1.38989e+07	0.0272952853598015	4.02262e+07	0.0125786163522013	1.63645e+06	0.00838574423480084	8.3336e+06	0.074585635359116	5.45134e+06	0.025974025974026	0	0.0972222222222222	0	0.143884892086331	9.51859e+06	0.0729613733905579	1.20345e+07	0.0901408450704225	2.28041e+06	0.121387283236994	2.77323e+07	0.0758620689655172	6.30982e+07	0.267857142857143	5.09885e+07
12	2	208170561	209171380	350842	0.350554545272876	0.0712788259958071	4.18248e+07	0.0746561886051081	4.80245e+07	0.0441767068273092	1.46256e+07	0.0366300366300366	5.36344e+07	0.00208768267223382	0	0.0282258064516129	1.68094e+07	0.0625	1.44318e+07	0.0931098696461825	5.66479e+07	0.297157622739018	1.39347e+07	0.0178147268408551	1.49997e+08	0.0223325062034739	3.21159e+07	0.0125786163522013	3.85174e+06	0.0125786163522013	1.29558e+07	0.074585635359116	1.54808e+07	0.012987012987013	8.50832e+06	0.0902777777777778	0	0.143884892086331	1.74253e+07	0.0772532188841202	2.16477e+07	0.0901408450704225	2.31354e+07	0.121387283236994	1.94338e+07	0.071264367816092	5.44688e+07	0.267857142857143	1.50015e+07
2	2	209171381	210172200	135264	0.135153174396994	0.0628930817610063	8.05771e+07	0.0707269155206287	4.99306e+07	0.0421686746987952	1.22923e+07	0.032967032967033	2.75269e+07	0.00208768267223382	1.5663e+06	0.0282258064516129	3.19797e+07	0.0568181818181818	0	0.0912476722532588	9.10614e+07	0.284237726098191	1.95408e+07	0.0201900237529691	1.359e+07	0.0223325062034739	609455	0.0125786163522013	0	0.0125786163522013	1.11772e+07	0.074585635359116	4.76965e+06	0.012987012987013	1.12014e+07	0.0902777777777778	0	0.143884892086331	129134	0.0815450643776824	9.47814e+06	0.0816901408450704	2.6576e+07	0.109826589595376	3.98082e+06	0.0735632183908046	6.42019e+06	0.267857142857143	1.94551e+07
6	2	210172201	211173020	503069	0.502656821406447	0.0670859538784067	4.56216e+07	0.0707269155206287	4.06297e+07	0.0411646586345382	1.36764e+07	0.0293040293040293	4.83803e+07	0.00208768267223382	2.10572e+06	0.0241935483870968	2.18049e+06	0.0625	1.50972e+07	0.0912476722532588	1.10802e+08	0.286821705426357	1.68608e+07	0.0178147268408551	4.87206e+06	0.0223325062034739	1.6747e+07	0.0125786163522013	0	0.0146750524109015	4.75343e+06	0.074585635359116	1.35093e+07	0.012987012987013	0	0.0902777777777778	1.62934e+06	0.143884892086331	1.12844e+07	0.0815450643776824	1.75026e+07	0.0788732394366197	2.5732e+07	0.115606936416185	4.12851e+07	0.0735632183908046	5.62684e+07	0.267857142857143	3.13863e+07
3	2	211173021	212173840	169907	0.169767790411862	0.0607966457023061	1.27038e+08	0.0628683693516699	1.06196e+08	0.0411646586345382	1.25969e+07	0.0256410256410256	3.44369e+07	0.00208768267223382	2.48861e+06	0.0241935483870968	2.53303e+07	0.0511363636363636	2.96129e+09	0.0912476722532588	6.64897e+06	0.286821705426357	1.81493e+07	0.0178147268408551	937653	0.0272952853598015	2.99629e+07	0.0188679245283019	4.00379e+06	0.010482180293501	1.65254e+07	0.0718232044198895	1.14654e+07	0.012987012987013	0	0.0972222222222222	0	0.143884892086331	7.71036e+06	0.0901287553648069	1.86252e+06	0.0845070422535211	3.29127e+07	0.109826589595376	4.56246e+07	0.0735632183908046	6.88737e+07	0.267857142857143	4.6465e+07
1	2	212173841	213174660	926322	0.925563038308587	0.0545073375262055	1.41727e+07	0.0648330058939096	1.29356e+07	0.0431726907630522	2.57954e+06	0.0256410256410256	865940	0.00208768267223382	686147	0.0181451612903226	5.7104e+06	0.0511363636363636	6.11059e+06	0.0912476722532588	1.62269e+07	0.291989664082687	147882	0.0178147268408551	1.05837e+06	0.0223325062034739	3.1178e+06	0.0125786163522013	0	0.010482180293501	1.1633e+06	0.069060773480663	3.8183e+06	0.012987012987013	3.27133e+06	0.0972222222222222	0	0.143884892086331	1.40809e+06	0.0815450643776824	4.12562e+06	0.0873239436619718	3.55111e+06	0.104046242774566	1.50633e+07	0.0735632183908046	1.72267e+07	0.267857142857143	0
3	2	213174661	214175480	396137	0.39581243380428	0.050314465408805	7.82202e+06	0.0609037328094303	6.57105e+06	0.0451807228915663	3.02321e+06	0.0256410256410256	1.94183e+07	0.00208768267223382	0	0.0181451612903226	5.73723e+06	0.0511363636363636	7.9383e+06	0.0912476722532588	1.85227e+07	0.281653746770026	113711	0.0178147268408551	6194.8	0.0297766749379653	1.1562e+07	0.0125786163522013	0	0.00838574423480084	1.63567e+06	0.069060773480663	816951	0.012987012987013	0	0.0972222222222222	0	0.140287769784173	437122	0.0858369098712446	9.64731e+06	0.0845070422535211	827665	0.109826589595376	8.0139e+06	0.0666666666666667	1.32862e+09	0.25	6.31095e+06
1	2	214175481	215176300	1000820	1	0.050314465408805	370067	0.0628683693516699	326530	0.0381526104417671	237617	0.0293040293040293	219600	0.00208768267223382	0	0.0161290322580645	1.268e+06	0.0511363636363636	1.25683e+06	0.0912476722532588	3.97996e+06	0.289405684754522	456247	0.0178147268408551	367346	0.0272952853598015	1.95918e+06	0.0125786163522013	0	0.00628930817610063	430681	0.069060773480663	324409	0.012987012987013	0	0.104166666666667	0	0.151079136690647	434426	0.0858369098712446	0	0.0816901408450704	657356	0.104046242774566	1.54912e+06	0.0689655172413793	5.02234e+06	0.267857142857143	0
5	2	215176301	216177120	547089	0.546640754581243	0.050314465408805	2.15351e+07	0.0648330058939096	2.5598e+07	0.0411646586345382	6.97988e+06	0.0293040293040293	2.71165e+07	0.00208768267223382	1.55232e+06	0.0161290322580645	1.89727e+07	0.0511363636363636	1.60943e+07	0.0931098696461825	4.95364e+07	0.284237726098191	6.6771e+06	0.0178147268408551	4.48554e+06	0.0198511166253102	2.5505e+07	0.0125786163522013	3.73032e+06	0.00838574423480084	4.73742e+06	0.069060773480663	4.16775e+06	0.012987012987013	2.76948e+06	0.0972222222222222	0	0.140287769784173	7.9472e+06	0.0858369098712446	5.9346e+06	0.0816901408450704	1.56846e+07	0.104046242774566	2.24967e+07	0.0735632183908046	5.04236e+07	0.267857142857143	2.34341e+07
6	2	216177121	217177940	322782	0.322517535620791	0.050314465408805	6.74651e+07	0.0609037328094303	4.73504e+07	0.03714859437751	1.363e+07	0.0256410256410256	5.1067e+07	0.00208768267223382	3.28185e+06	0.0141129032258065	3.28583e+07	0.0511363636363636	2.14332e+07	0.0912476722532588	9.30722e+07	0.284237726098191	1.66712e+07	0.0178147268408551	9.8834e+06	0.0223325062034739	4.96175e+07	0.0125786163522013	6.32258e+06	0.010482180293501	1.07292e+07	0.069060773480663	1.91737e+07	0.012987012987013	9.38808e+06	0.104166666666667	2.60342e+06	0.136690647482014	1.07759e+07	0.0729613733905579	1.22292e+07	0.0788732394366197	2.85348e+07	0.0867052023121387	3.26112e+07	0.0735632183908046	9.07349e+07	0.267857142857143	7.94376e+06
5	2	217177941	218178760	119777	0.119678863332068	0.0482180293501048	5.74133e+07	0.0628683693516699	4.5672e+06	0.034136546184739	2.28599e+07	0.0256410256410256	4.63825e+07	0.00208768267223382	1.77258e+06	0.0141129032258065	1.9071e+06	0.0511363636363636	5.25085e+07	0.0912476722532588	8.6125e+07	0.276485788113695	1.86358e+07	0.0178147268408551	1.84618e+07	0.0223325062034739	3.28695e+06	0.0125786163522013	0	0.010482180293501	1.44257e+07	0.0662983425414365	5.38635e+06	0.012987012987013	0	0.104166666666667	6.95737e+06	0.136690647482014	2.91663e+06	0.0772532188841202	2.15454e+07	0.0816901408450704	2.7554e+07	0.092485549132948	3.79493e+07	0.0735632183908046	8.15059e+07	0.267857142857143	0
8	2	218178761	219179580	189625	0.189469634899383	0.050314465408805	7.0111e+07	0.0648330058939096	6.82325e+07	0.036144578313253	2.20256e+07	0.0256410256410256	1.02542e+06	0.00208768267223382	7.83757e+06	0.0181451612903226	3.35469e+07	0.0568181818181818	4.31172e+07	0.0912476722532588	1.77263e+07	0.268733850129199	3.25242e+06	0.0201900237529691	23351.6	0.0223325062034739	7.03142e+07	0.0125786163522013	0	0.0125786163522013	1.7085e+07	0.0718232044198895	2.23311e+07	0.012987012987013	1.59805e+07	0.104166666666667	4394.64	0.136690647482014	4.60573e+07	0.0772532188841202	3.08195e+07	0.0788732394366197	4.68376e+07	0.0867052023121387	6.34414e+07	0.0827586206896552	1.39222e+08	0.267857142857143	0
12	2	220180401	221181220	179873	0.17972562498751	0.0482180293501048	2.37804e+08	0.0667976424361493	2.13826e+08	0.0311244979919679	5.05407e+07	0.0183150183150183	1.35898e+08	0.00208768267223382	1.53446e+07	0.0141129032258065	1.08061e+08	0.0511363636363636	1.11889e+08	0.0912476722532588	3.26062e+08	0.260981912144703	4.98608e+07	0.0190023752969121	4.57037e+07	0.0223325062034739	1.19132e+07	0.0188679245283019	0	0.00209643605870021	2.89431e+07	0.0662983425414365	2.71636e+07	0.025974025974026	1.65955e+07	0.104166666666667	4.6329e+06	0.136690647482014	6.31207e+06	0.0858369098712446	4.38906e+07	0.0816901408450704	1.1887e+08	0.0867052023121387	1.25402e+08	0.0666666666666667	3.15379e+07	0.267857142857143	5.70203e+07
2	2	222182041	223182860	243663	0.243463360044763	0.050314465408805	4.12762e+07	0.0667976424361493	2.52556e+07	0.0331325301204819	1.33666e+07	0.0146520146520147	3.66841e+07	0.00208768267223382	871344	0.0141129032258065	2.10463e+07	0.0511363636363636	1.02601e+07	0.0949720670391061	7.79246e+07	0.248062015503876	1.29992e+07	0.0190023752969121	1.56296e+07	0.0223325062034739	2.29826e+07	0.0125786163522013	2.79186e+06	0.00209643605870021	1.15232e+07	0.0662983425414365	5.34727e+06	0.025974025974026	0	0.0972222222222222	0	0.136690647482014	7.16861e+06	0.0772532188841202	1.34119e+07	0.0845070422535211	3.28322e+07	0.092485549132948	2.81956e+07	0.064367816091954	6.55355e+07	0.303571428571429	2.21839e+07
5	2	223182861	224183680	289999	0.289761395655562	0.0419287211740042	1.77849e+07	0.0667976424361493	1.59854e+07	0.0331325301204819	7.52354e+06	0.0146520146520147	1.34849e+07	0.00208768267223382	0	0.0141129032258065	1.41468e+07	0.0511363636363636	1.30124e+07	0.0949720670391061	5.2601e+07	0.242894056847545	6.21313e+06	0.0213776722090261	6.37784e+06	0.0198511166253102	1.66183e+07	0.0125786163522013	0	0.00419287211740042	2.99201e+06	0.0662983425414365	1.12322e+06	0.025974025974026	0	0.0972222222222222	2.87357e+06	0.136690647482014	4.51741e+06	0.0815450643776824	453722	0.0845070422535211	1.26017e+07	0.0867052023121387	156740	0.0735632183908046	2.64551e+07	0.321428571428571	931970
5	2	224183681	225184500	182800	0.182650226814013	0.0314465408805031	5.29902e+07	0.068762278978389	4.59906e+07	0.0321285140562249	1.06223e+07	0.0146520146520147	4.27857e+06	0.00208768267223382	0	0.0141129032258065	2.39685e+07	0.0511363636363636	1.70952e+07	0.0931098696461825	8.1769e+07	0.250645994832041	1.73272e+07	0.0190023752969121	7.41072e+06	0.0198511166253102	3.95455e+07	0.0125786163522013	0	0.00209643605870021	9.41154e+06	0.0662983425414365	1.60372e+07	0.025974025974026	816486	0.0972222222222222	1.36761e+07	0.136690647482014	9.55539e+06	0.0815450643776824	7.10449e+06	0.0816901408450704	1.63027e+07	0.0809248554913295	2.8577e+07	0.0666666666666667	4.6067e+06	0.303571428571429	1.4785e+07
3	2	225184501	226185320	388769	0.388450470614096	0.0356394129979036	5.5854e+07	0.0648330058939096	3.23657e+07	0.0281124497991968	1.40133e+07	0.010989010989011	2.58659e+07	0.00208768267223382	2.18448e+06	0.0141129032258065	1.98372e+07	0.0511363636363636	1.28611e+06	0.0912476722532588	4.6669e+07	0.24031007751938	1.40303e+06	0.0190023752969121	6.34333e+06	0.0198511166253102	2.60346e+07	0.0125786163522013	0	0.00209643605870021	7.19116e+06	0.069060773480663	1.08921e+07	0.025974025974026	3.83914e+06	0.0972222222222222	0	0.133093525179856	1.12324e+07	0.0772532188841202	1.17683e+07	0.0816901408450704	1.36277e+07	0.092485549132948	233838	0.0689655172413793	3.45219e+07	0.303571428571429	3.57253e+07
1	2	226185321	227186140	242685	0.242486161347695	0.0377358490566038	1.99572e+07	0.0667976424361493	2.09212e+07	0.0281124497991968	149476	0.010989010989011	1.38896e+07	0.00208768267223382	0	0.0141129032258065	1.36304e+07	0.0511363636363636	1.03014e+06	0.0893854748603352	4.35578e+07	0.242894056847545	1.87299e+06	0.0190023752969121	6.10454e+06	0.0223325062034739	1.66152e+06	0.0125786163522013	0	0.00419287211740042	533983	0.0662983425414365	4.02661e+06	0.025974025974026	0	0.0972222222222222	0	0.136690647482014	5.4218e+06	0.0901287553648069	818656	0.0873239436619718	9.64681e+06	0.0982658959537572	2.20183e+07	0.0666666666666667	3.02824e+07	0.303571428571429	1.1446e+07
4	2	227186141	228186960	421861	0.421515357406926	0.0377358490566038	5.7568e+07	0.0667976424361493	3.60266e+06	0.0291164658634538	1.41132e+07	0.010989010989011	4.03758e+06	0.00208768267223382	352296	0.0161290322580645	2.59362e+07	0.0511363636363636	1.48153e+07	0.0912476722532588	5.31221e+07	0.242894056847545	1.69318e+07	0.0190023752969121	9.98702e+06	0.0173697270471464	3.34539e+07	0.0125786163522013	0	0.00419287211740042	4.59785e+06	0.0662983425414365	6.9492e+06	0.025974025974026	3.53798e+06	0.0972222222222222	1.97537e+06	0.136690647482014	1.35157e+07	0.0815450643776824	1.73833e+07	0.0873239436619718	1.26847e+07	0.0982658959537572	3.28216e+07	0.064367816091954	6.02019e+07	0.339285714285714	2.78876e+07
7	2	228186961	229187780	364659	0.364360224615815	0.0356394129979036	8.82575e+07	0.0667976424361493	6.14755e+07	0.0271084337349398	1.76814e+07	0.010989010989011	4.39372e+07	0.00208768267223382	2.32891e+06	0.0161290322580645	3.14803e+07	0.0511363636363636	3.25647e+07	0.0912476722532588	7.76885e+07	0.24031007751938	1.99439e+07	0.0190023752969121	1.12697e+07	0.0173697270471464	4.77402e+07	0.0125786163522013	7.51312e+06	0.00419287211740042	1.00689e+07	0.0662983425414365	1.60786e+07	0.025974025974026	4.09297e+06	0.0902777777777778	4.57048e+06	0.136690647482014	8.38254e+06	0.0772532188841202	2.81742e+07	0.0816901408450704	1.90689e+07	0.092485549132948	2.53134e+07	0.064367816091954	5.39706e+07	0.303571428571429	3.80873e+07
1	2	229187781	230188600	237174	0.236979676665135	0.0356394129979036	3.61398e+06	0.0667976424361493	6.54417e+06	0.0251004016064257	3.07386e+06	0.010989010989011	1.15833e+07	0.00208768267223382	0	0.0161290322580645	2.15668e+06	0.0511363636363636	2.6352e+06	0.0893854748603352	1.16374e+07	0.232558139534884	3.79848e+06	0.0190023752969121	1.05408e+06	0.0223325062034739	1.70701e+06	0.0125786163522013	0	0.00419287211740042	6.36082e+06	0.0662983425414365	0	0.025974025974026	0	0.0833333333333333	0	0.136690647482014	3.68237e+06	0.0772532188841202	5.85599e+06	0.0816901408450704	0	0.0982658959537572	2.3058e+06	0.0620689655172414	1.56574e+07	0.303571428571429	0
6	2	230188601	231189420	639586	0.639061969185268	0.039832285115304	3.01021e+07	0.0667976424361493	3.27166e+07	0.0271084337349398	8.4307e+06	0.010989010989011	2.49131e+07	0.00208768267223382	1.32782e+06	0.0161290322580645	1.31287e+07	0.0511363636363636	1.36807e+07	0.0893854748603352	5.41088e+07	0.237726098191214	1.38979e+07	0.0166270783847981	7.41741e+06	0.0148883374689826	2.60585e+07	0.0188679245283019	1.0709e+06	0.00419287211740042	5.72838e+06	0.069060773480663	4.58358e+06	0.025974025974026	0	0.0833333333333333	3.90878e+06	0.136690647482014	8.91476e+06	0.0643776824034335	1.11679e+07	0.0816901408450704	1.71415e+07	0.0867052023121387	1.80405e+07	0.0551724137931034	4.26785e+07	0.303571428571429	3.04016e+07
10	2	231189421	232190240	511945	0.511525549049779	0.039832285115304	2.51143e+07	0.0667976424361493	2.33363e+06	0.0261044176706827	1.12096e+07	0.0146520146520147	4.08324e+07	0.00208768267223382	414721	0.0161290322580645	1.69422e+07	0.0511363636363636	2.31959e+07	0.0912476722532588	4.58138e+07	0.245478036175711	1.33182e+07	0.0201900237529691	7.38967e+06	0.0173697270471464	2.53064e+07	0.0125786163522013	1.3379e+06	0.00628930817610063	6.342e+06	0.069060773480663	6.38345e+06	0.025974025974026	8.49276e+06	0.0763888888888889	162778	0.140287769784173	1.02807e+07	0.0686695278969957	5.54138e+06	0.0816901408450704	1.2979e+07	0.092485549132948	2.42274e+07	0.0551724137931034	4.3693e+07	0.285714285714286	0
9	2	232190241	233191060	420801	0.420456225894766	0.039832285115304	3.01333e+07	0.0667976424361493	2.68136e+07	0.0240963855421687	1.42877e+07	0.010989010989011	4.40572e+07	0.00208768267223382	0	0.0181451612903226	2.19926e+07	0.0511363636363636	7.52032e+06	0.0912476722532588	4.15494e+07	0.24031007751938	8.761e+06	0.0190023752969121	9.16357e+06	0.0173697270471464	1.83545e+07	0.0125786163522013	0	0.00628930817610063	724834	0.069060773480663	9.31929e+06	0.025974025974026	344409	0.0763888888888889	1.58428e+07	0.140287769784173	6.28129e+06	0.0686695278969957	6.64733e+06	0.0816901408450704	1.81587e+07	0.0867052023121387	2.57906e+07	0.0551724137931034	3.87598e+07	0.303571428571429	1.98035e+07
14	2	233191061	234191880	359901	0.359606122979157	0.039832285115304	9.28873e+07	0.0648330058939096	7.97374e+07	0.0251004016064257	2.45165e+07	0.010989010989011	8.99869e+07	0.00208768267223382	6.48916e+06	0.0161290322580645	5.52873e+07	0.0454545454545455	3.00861e+07	0.0931098696461825	1.54034e+08	0.237726098191214	2.54912e+07	0.0178147268408551	3.28991e+07	0.0173697270471464	6.21219e+07	0.0125786163522013	3.80622e+06	0.00628930817610063	2.12799e+07	0.069060773480663	1.4576e+07	0.025974025974026	2.01344e+07	0.0833333333333333	6.94635e+06	0.140287769784173	3.67208e+07	0.0686695278969957	3.94119e+07	0.0788732394366197	4.00931e+07	0.0867052023121387	5.42684e+07	0.0574712643678161	1.23738e+08	0.303571428571429	3.08727e+07
7	2	234191881	235192700	376204	0.375895765472313	0.039832285115304	7.53915e+07	0.0628683693516699	9.19443e+07	0.0251004016064257	3.25284e+07	0.010989010989011	9.7615e+07	0.00208768267223382	3.95052e+06	0.0181451612903226	4.55486e+07	0.0511363636363636	3.04754e+07	0.0912476722532588	1.38268e+08	0.232558139534884	3.77991e+07	0.0166270783847981	2.97629e+07	0.0173697270471464	6.96688e+07	0.0125786163522013	1.82064e+06	0.00628930817610063	9.26582e+06	0.069060773480663	1.82421e+07	0.025974025974026	0	0.0833333333333333	221511	0.140287769784173	2.46995e+07	0.0729613733905579	2.86849e+06	0.076056338028169	4.60743e+07	0.0809248554913295	3.09085e+07	0.0551724137931034	9.48307e+07	0.303571428571429	8.12207e+07
2	2	235192701	236193520	19393	0.0193771107691693	0.0419287211740042	2.69817e+08	0.0609037328094303	2.05803e+08	0.0281124497991968	5.12447e+07	0.010989010989011	8.69073e+07	0.00208768267223382	2.1896e+07	0.0201612903225806	2.52509e+08	0.0568181818181818	1.6318e+08	0.0875232774674116	3.93292e+06	0.235142118863049	1.69462e+08	0.0178147268408551	5.30914e+07	0.0173697270471464	3.16998e+08	0.0125786163522013	3.53185e+07	0.00628930817610063	4.49368e+07	0.0662983425414365	6.71857e+07	0.025974025974026	7.58309e+07	0.0833333333333333	0	0.140287769784173	9.08634e+07	0.0772532188841202	7.36643e+07	0.0873239436619718	5.19111e+06	0.0751445086705202	3.59756e+08	0.0551724137931034	4.33202e+08	0.303571428571429	2.86472e+08
3	2	236193521	237194340	700968	0.700393677184709	0.0419287211740042	6.22063e+06	0.0648330058939096	7275.34	0.0321285140562249	2.14526e+06	0.010989010989011	6.34044e+06	0.00208768267223382	30288.7	0.0221774193548387	6.65253e+06	0.0511363636363636	6.32037e+06	0.0949720670391061	1.79466e+07	0.235142118863049	3.44589e+06	0.0190023752969121	1.84315e+06	0.0148883374689826	6.9029e+06	0.0125786163522013	0	0.00209643605870021	928372	0.0662983425414365	464690	0.038961038961039	0	0.0902777777777778	1.20898e+06	0.140287769784173	1.88537e+06	0.0815450643776824	4.16525e+06	0.0816901408450704	1.90849e+06	0.0751445086705202	4.42356e+06	0.0528735632183908	1.93831e+07	0.303571428571429	3.96277e+06
2	2	237194341	238195160	194358	0.194198757019244	0.0440251572327044	1.92758e+07	0.0648330058939096	1.60786e+06	0.0301204819277108	8.39233e+06	0.010989010989011	2.22493e+07	0.00208768267223382	0	0.0221774193548387	9.23487e+06	0.0511363636363636	97692.6	0.0912476722532588	7.55351e+07	0.24031007751938	1.22503e+07	0.0166270783847981	8.64172e+06	0.0148883374689826	1.21539e+07	0.0125786163522013	0	0.00419287211740042	6.71106e+06	0.0662983425414365	3.35189e+06	0.038961038961039	0	0.0833333333333333	0	0.140287769784173	4.53317e+06	0.0815450643776824	2.60986e+07	0.0788732394366197	1.20053e+07	0.0751445086705202	7.91561e+06	0.0551724137931034	4.14931e+07	0.303571428571429	1.47004e+07
14	2	238195161	239195980	501373	0.500962210986991	0.0440251572327044	7.81715e+07	0.0648330058939096	7.27309e+07	0.0271084337349398	2.33772e+07	0.010989010989011	8.75374e+07	0.00208768267223382	127040	0.0221774193548387	3.72379e+07	0.0454545454545455	3.40836e+07	0.0931098696461825	1.39489e+07	0.232558139534884	2.37443e+07	0.0178147268408551	2.69184e+07	0.0173697270471464	5.46119e+07	0.0125786163522013	2.73222e+06	0.00419287211740042	1.6113e+07	0.069060773480663	1.62951e+07	0.038961038961039	9.06601e+06	0.0763888888888889	1.67607e+06	0.140287769784173	3.32421e+06	0.0729613733905579	3.17967e+07	0.0788732394366197	2.88769e+07	0.0809248554913295	4.44932e+07	0.0551724137931034	9.78343e+07	0.321428571428571	7.03949e+07
4	2	239195981	240196800	320190	0.319927659319358	0.0440251572327044	2.81446e+07	0.068762278978389	2.60262e+07	0.0281124497991968	7.43606e+06	0.0183150183150183	2.44268e+07	0.00208768267223382	0	0.0201612903225806	2.0821e+07	0.0454545454545455	1.186e+07	0.0931098696461825	3.59595e+07	0.222222222222222	5.94885e+06	0.0166270783847981	4.82339e+06	0.0148883374689826	1.49314e+07	0.0125786163522013	0	0.00209643605870021	7.46839e+06	0.0662983425414365	4.08254e+06	0.051948051948052	4.66141e+06	0.0763888888888889	0	0.140287769784173	9.63085e+06	0.0729613733905579	2.34823e+06	0.076056338028169	7.38582e+06	0.0751445086705202	3.84387e+07	0.0551724137931034	4.10715e+07	0.303571428571429	0
5	2	240196801	241197620	144869	0.144750304750105	0.0440251572327044	5.61855e+07	0.0707269155206287	7.4457e+07	0.0311244979919679	1.56684e+06	0.0183150183150183	7.66976e+07	0.00208768267223382	0	0.0241935483870968	2.48429e+07	0.0454545454545455	2.62131e+06	0.0931098696461825	1.12337e+08	0.222222222222222	9.95594e+06	0.0178147268408551	1.61155e+07	0.0148883374689826	2.78338e+07	0.0125786163522013	4.72794e+06	0.00209643605870021	9.04295e+06	0.0662983425414365	9.02325e+06	0.051948051948052	2.06053e+07	0.0763888888888889	0	0.140287769784173	2.12861e+07	0.0686695278969957	1.0004e+07	0.0788732394366197	1.87194e+07	0.069364161849711	2.12393e+06	0.0528735632183908	5.87875e+07	0.303571428571429	1.91744e+07
13	2	241197621	242198440	441544	0.441182230570932	0.0419287211740042	9.41128e+07	0.0550098231827112	9.25606e+07	0.0210843373493976	2.35407e+07	0.021978021978022	1.24953e+08	0.00208768267223382	8.17437e+06	0.0181451612903226	4.57419e+06	0.0340909090909091	4.38801e+07	0.0819366852886406	1.46739e+06	0.178294573643411	1.56509e+07	0.0142517814726841	2.27921e+07	0.00744416873449132	7.36254e+07	0.00628930817610063	4.59077e+06	0.00628930817610063	1.85878e+07	0.0580110497237569	2.24307e+07	0.025974025974026	1.9139e+07	0.0555555555555556	7.42551e+06	0.133093525179856	2.73336e+07	0.0429184549356223	5.66195e+07	0.0732394366197183	3.66252e+07	0.0578034682080925	7.71338e+06	0.0367816091954023	1.39779e+08	0.285714285714286	6.92016e+07
12	2	242198441	243199260	348347	0.348061589496613	0	5.35623e+07	0	6.38561e+07	0	1.297e+07	0	3.68039e+06	0	7.79105e+06	0	3.00961e+07	0	4.0777e+07	0	8.98096e+07	0	1.63192e+07	0	1.70469e+07	0	4.41646e+07	0	3.61094e+06	0	1.32401e+07	0	9.51614e+06	0	3.72818e+06	0	7.97417e+06	0	1.23915e+07	0	1.60168e+07	0	2.42594e+07	0	4.81216e+07	0	514746	0	2.0505e+06
1	3	2000227	3000339	57928	0.0579214548755991	0.0251572327044025	5.23115e+07	0.0275049115913556	5.61392e+07	0.110441767068273	1.12388e+07	0.0695970695970696	1.04623e+07	0.00208768267223382	0	0.0221774193548387	1.65194e+07	0.0227272727272727	2.28646e+07	0.0409683426443203	6.31113e+09	0.20671834625323	0	0.0510688836104513	2.02562e+07	0.265508684863524	2.0551e+07	0.0125786163522013	0	0.0419287211740042	7.81123e+06	0.0248618784530387	0	0.116883116883117	0	0.104166666666667	0	0.223021582733813	0	0.244635193133047	1.15858e+07	0.101408450704225	5.91192e+06	0.0520231213872832	2.13121e+07	0.0413793103448276	5.75427e+07	0.0892857142857143	0
5	3	3000340	4000452	182412	0.182391389772956	0.0251572327044025	7.10642e+07	0.0275049115913556	4.65603e+06	0.112449799196787	2.63768e+07	0.0695970695970696	7.64171e+07	0.00208768267223382	3.44786e+06	0.0221774193548387	3.16275e+07	0.0227272727272727	1.45221e+07	0.0391061452513966	1.31759e+08	0.214470284237726	1.65289e+07	0.0475059382422803	2.49186e+07	0.26302729528536	5.24184e+07	0.0125786163522013	5.02945e+06	0.0419287211740042	1.23749e+07	0.0220994475138122	9.29169e+06	0.116883116883117	0	0.104166666666667	0	0.223021582733813	2.20386e+07	0.240343347639485	2.54137e+07	0.101408450704225	1.87102e+07	0.046242774566474	6.60493e+07	0.0390804597701149	7.6913e+07	0.0892857142857143	6.85262e+07
3	3	4000453	5000565	448712	0.448661301272956	0.0251572327044025	1.64069e+07	0.0255402750491159	1.4495e+07	0.114457831325301	8.36086e+06	0.0659340659340659	3.35633e+07	0.00208768267223382	2.33606e+06	0.0201612903225806	1.37961e+07	0.0227272727272727	1.32831e+07	0.0409683426443203	4.28392e+07	0.219638242894057	5.65635e+06	0.0475059382422803	8.08301e+06	0.270471464019851	1.57932e+07	0.0125786163522013	0	0.0377358490566038	3.01842e+06	0.0220994475138122	0	0.116883116883117	0	0.104166666666667	6.89258e+06	0.223021582733813	1.23189e+07	0.244635193133047	733092	0.104225352112676	9.12738e+06	0.046242774566474	1.31094e+07	0.0413793103448276	3.06933e+07	0.0892857142857143	6.75334e+06
3	3	5000566	6000678	88335	0.0883250192728222	0.0272536687631027	2.7952e+07	0.0255402750491159	1.83576e+06	0.108433734939759	1.01987e+07	0.0659340659340659	8.86548e+07	0.00208768267223382	9.49312e+06	0.0201612903225806	2.17703e+07	0.0227272727272727	2.24911e+07	0.0409683426443203	8.33113e+07	0.211886304909561	1.12642e+07	0.0486935866983373	1.60679e+07	0.258064516129032	6.5563e+07	0.0125786163522013	0	0.0356394129979036	5.09934e+06	0.0220994475138122	0	0.103896103896104	0	0.104166666666667	0	0.223021582733813	3.9821e+07	0.244635193133047	0	0.101408450704225	1.53499e+07	0.046242774566474	4.04305e+07	0.0344827586206897	3.6842e+07	0.0892857142857143	3.43047e+07
1	3	6000679	7000791	97717	0.0977059592266074	0.0230607966457023	1.248e+07	0.0275049115913556	1.66853e+07	0.11144578313253	0	0.0659340659340659	2.46594e+07	0.00208768267223382	0	0.0201612903225806	2.47189e+07	0.0227272727272727	2.03317e+07	0.0409683426443203	1.98926e+07	0.204134366925065	0	0.0475059382422803	3.96141e+06	0.272952853598015	2.00659e+07	0.0125786163522013	0	0.0377358490566038	0	0.0220994475138122	0	0.103896103896104	0	0.104166666666667	0	0.223021582733813	0	0.244635193133047	0	0.104225352112676	6.98542e+06	0.0520231213872832	1.23297e+07	0.0367816091954023	4.27674e+07	0.0892857142857143	0
1	3	7000792	8000904	781301	0.781212722962305	0.0209643605870021	6.2818e+06	0.0275049115913556	1.10695e+07	0.107429718875502	98581.5	0.0659340659340659	462620	0.00208768267223382	0	0.0201612903225806	1.23663e+06	0.0227272727272727	423813	0.0391061452513966	1.17599e+07	0.214470284237726	2.58569e+06	0.0463182897862233	1.15456e+06	0.285359801488834	5.03904e+06	0.0125786163522013	0	0.0356394129979036	1.14791e+06	0.0220994475138122	0	0.103896103896104	2.09822e+06	0.104166666666667	0	0.223021582733813	0	0.248927038626609	1.67309e+06	0.107042253521127	2.61207e+06	0.0520231213872832	308414	0.0390804597701149	1.17737e+07	0.0892857142857143	1.65151e+07
4	3	8000905	9001017	170840	0.170820697261209	0.0230607966457023	7.18212e+06	0.0275049115913556	2.68941e+07	0.107429718875502	1.27248e+07	0.0659340659340659	2.1157e+07	0.00208768267223382	0	0.0221774193548387	3.39329e+07	0.0227272727272727	1.55058e+07	0.0391061452513966	7.73801e+07	0.219638242894057	1.17069e+06	0.0510688836104513	1.21315e+07	0.295285359801489	2.78735e+07	0.0125786163522013	0	0.0377358490566038	1.06668e+06	0.0220994475138122	0	0.103896103896104	9.59579e+06	0.104166666666667	0	0.219424460431655	1.17069e+06	0.244635193133047	3.80093e+06	0.107042253521127	1.38895e+07	0.0809248554913295	2.85533e+07	0.0459770114942529	7.61985e+07	0.125	7.80457e+07
20	3	9001018	10001130	614958	0.614888517597512	0.0209643605870021	3.42858e+07	0.031434184675835	2.42377e+09	0.108433734939759	1.77471e+07	0.0586080586080586	6.58194e+07	0.00208768267223382	5.45452e+06	0.0241935483870968	2.65809e+07	0.0227272727272727	3.23072e+07	0.037243947858473	8.73482e+07	0.235142118863049	1.16748e+07	0.0486935866983373	1.47256e+07	0.290322580645161	5.97746e+07	0.0125786163522013	0	0.0335429769392034	1.19623e+07	0.0220994475138122	2.06962e+07	0.103896103896104	1.86605e+07	0.104166666666667	4.97794e+06	0.219424460431655	2.68311e+07	0.248927038626609	2.13964e+07	0.115492957746479	2.05347e+07	0.046242774566474	4.11205e+06	0.0505747126436782	8.56363e+07	0.125	2.24293e+07
10	3	10001131	11001243	485663	0.48560812628173	0.0188679245283019	2.79623e+07	0.0294695481335953	4.07344e+06	0.106425702811245	1.57781e+06	0.0622710622710623	5.02504e+07	0.00208768267223382	2.58999e+06	0.0181451612903226	2.56149e+06	0.0227272727272727	2.72721e+07	0.037243947858473	8.13124e+07	0.217054263565891	1.46328e+07	0.0463182897862233	1.41176e+07	0.30272952853598	6.00206e+06	0.0125786163522013	3.81304e+06	0.0377358490566038	1.07877e+06	0.0220994475138122	6.36431e+07	0.103896103896104	3.37548e+06	0.0902777777777778	4.11808e+06	0.219424460431655	1.02952e+06	0.244635193133047	1.4901e+07	0.109859154929577	1.75089e+07	0.046242774566474	5.26731e+07	0.0482758620689655	6.47992e+07	0.107142857142857	2.74539e+07
5	3	11001244	12001356	477978	0.477923994588612	0.0188679245283019	1.61973e+07	0.0294695481335953	1.19065e+07	0.104417670682731	5.88583e+06	0.0622710622710623	3.36238e+07	0.00208768267223382	1.75442e+06	0.0181451612903226	1.10113e+07	0.0227272727272727	1.24697e+07	0.037243947858473	3.78367e+07	0.204134366925065	9.32144e+06	0.0475059382422803	59466.7	0.320099255583127	2.13484e+07	0.0125786163522013	0	0.0356394129979036	3.29102e+06	0.0220994475138122	0	0.103896103896104	0	0.0902777777777778	0	0.219424460431655	2.09215e+06	0.248927038626609	957191	0.109859154929577	9.9626e+06	0.046242774566474	1.96908e+07	0.0482758620689655	2.50813e+07	0.125	1.44286e+07
9	3	12001357	13001469	307158	0.307123295067657	0.0209643605870021	3.36067e+07	0.0255402750491159	4.63843e+06	0.108433734939759	1.76208e+07	0.0622710622710623	4.70697e+07	0.00208768267223382	4.09516e+06	0.0181451612903226	2.94559e+07	0.0227272727272727	3.4497e+07	0.037243947858473	9.31172e+07	0.214470284237726	3.10841e+07	0.0486935866983373	1.85076e+07	0.307692307692308	6.25085e+07	0.0125786163522013	0	0.0377358490566038	1.00395e+06	0.0220994475138122	1.18387e+07	0.116883116883117	5.33714e+06	0.0972222222222222	3.22342e+06	0.219424460431655	1.95339e+07	0.244635193133047	1.68034e+07	0.109859154929577	2.09686e+06	0.0520231213872832	3.87578e+07	0.0528735632183908	7.82884e+07	0.125	4.49056e+06
5	3	13001470	14001582	262800	0.262770306955314	0.0188679245283019	6.17723e+07	0.0255402750491159	4.34286e+07	0.100401606425703	1.27002e+07	0.0622710622710623	3.20918e+06	0.00208768267223382	797731	0.0181451612903226	2.18479e+06	0.0227272727272727	2.51998e+07	0.037243947858473	7.33625e+07	0.224806201550388	1.94142e+07	0.0451306413301663	1.47107e+07	0.28287841191067	4.5899e+07	0.0125786163522013	0	0.0377358490566038	1.26278e+07	0.0220994475138122	1.35899e+07	0.116883116883117	0	0.0902777777777778	0	0.219424460431655	1.90259e+07	0.236051502145923	969471	0.104225352112676	1.40932e+07	0.0578034682080925	5.95991e+07	0.0505747126436782	9.03869e+07	0.142857142857143	6.13738e+07
8	3	14001583	15001695	342566	0.342527294415731	0.0209643605870021	4.41713e+07	0.0255402750491159	4.99745e+07	0.104417670682731	2.2455e+07	0.0622710622710623	6.36904e+07	0.00208768267223382	3.0599e+06	0.0161290322580645	1.67606e+07	0.0284090909090909	3.69758e+07	0.0353817504655493	9.38076e+07	0.20671834625323	2.12559e+07	0.0463182897862233	2.25998e+06	0.267990074441687	3.73379e+06	0.0125786163522013	0	0.0335429769392034	1.3473e+07	0.0220994475138122	5.21276e+06	0.103896103896104	9.26713e+06	0.0972222222222222	0	0.219424460431655	1.89744e+07	0.240343347639485	1.88332e+06	0.107042253521127	2.45719e+07	0.0578034682080925	2.74743e+07	0.0505747126436782	7.4259e+07	0.107142857142857	3.89219e+07
10	3	15001696	16001808	542921	0.542859656858775	0.0188679245283019	1.5753e+07	0.0216110019646365	2.14057e+07	0.102409638554217	1.21365e+07	0.0622710622710623	5.65881e+06	0.00208768267223382	2.70298e+06	0.0141129032258065	1.13481e+07	0.0284090909090909	1.10513e+07	0.0353817504655493	5.54128e+07	0.211886304909561	8.98482e+06	0.0451306413301663	1.18985e+07	0.255583126550869	3.96714e+06	0.0125786163522013	1.70545e+06	0.0356394129979036	5.30921e+06	0.0220994475138122	6.57817e+06	0.103896103896104	5.84727e+06	0.0902777777777778	1.80577e+06	0.219424460431655	1.10513e+07	0.231759656652361	7.03906e+06	0.104225352112676	1.42638e+07	0.0520231213872832	1.75418e+07	0.0459770114942529	4.85831e+07	0.107142857142857	613963
4	3	16001809	17001921	230311	0.230284977797509	0.0188679245283019	1.41894e+07	0.0235756385068762	3.18567e+06	0.0933734939759036	4.47624e+06	0.0622710622710623	3.9713e+07	0.00208768267223382	2.73079e+06	0.0120967741935484	1.87873e+07	0.0284090909090909	1.73678e+07	0.0335195530726257	7.26726e+07	0.201550387596899	1.21737e+07	0.0451306413301663	7.85367e+06	0.258064516129032	3.5205e+07	0.0125786163522013	4.02033e+06	0.0356394129979036	576366	0.0220994475138122	0	0.103896103896104	689199	0.0902777777777778	0	0.219424460431655	0	0.240343347639485	8.34991e+06	0.101408450704225	1.01992e+07	0.0404624277456647	2.01951e+06	0.0413793103448276	5.66342e+07	0.125	2.89464e+07
2	3	17001922	18002034	427796	0.42774766451391	0.0188679245283019	6.15148e+06	0.0235756385068762	8.8929e+06	0.0953815261044177	5.10123e+06	0.0586080586080586	1.56788e+07	0.00208768267223382	980110	0.0120967741935484	5.51312e+06	0.0284090909090909	467513	0.0353817504655493	2.18371e+07	0.201550387596899	1.10262e+06	0.0439429928741093	3.92107e+06	0.253101736972705	1.4385e+07	0.0125786163522013	0	0.0356394129979036	2.5858e+06	0.0220994475138122	4.17422e+06	0.116883116883117	0	0.0902777777777778	0	0.219424460431655	116878	0.223175965665236	5.88066e+06	0.101408450704225	2.35325e+06	0.0346820809248555	5.43619e+06	0.0390804597701149	1.49931e+07	0.107142857142857	1.50811e+07
1	3	18002035	19002147	71798	0.0717898877426851	0.0167714884696017	3.66525e+07	0.0176817288801572	2.26471e+07	0.0843373493975904	1.94426e+07	0.0586080586080586	3.39706e+07	0.00208768267223382	0	0.0120967741935484	6.72849e+06	0.0284090909090909	4.64265e+07	0.0353817504655493	5.32279e+07	0.196382428940568	4.53469e+07	0.0427553444180523	1.43587e+07	0.248138957816377	4.26911e+07	0.0125786163522013	0	0.0356394129979036	307461	0.0193370165745856	0	0.116883116883117	0	0.0902777777777778	1.35223e+07	0.219424460431655	6.96398e+06	0.210300429184549	2.56343e+07	0.101408450704225	1.40687e+07	0.0520231213872832	0	0.0390804597701149	8.93339e+07	0.107142857142857	4.49289e+07
3	3	19002148	20002260	449639	0.449588196533792	0.0146750524109015	2.03504e+07	0.0216110019646365	2.4982e+07	0.0843373493975904	6.2488e+06	0.0586080586080586	1.49171e+07	0.00208768267223382	932497	0.0141129032258065	9.6231e+06	0.0340909090909091	5.97049e+06	0.0353817504655493	3.67526e+07	0.196382428940568	8.0873e+06	0.0427553444180523	6.02634e+06	0.240694789081886	1.95237e+07	0.0125786163522013	0	0.039832285115304	247112	0.0193370165745856	7.94288e+06	0.116883116883117	3.58711e+06	0.0902777777777778	0	0.219424460431655	5.56002e+06	0.214592274678112	1.112e+07	0.0985915492957746	8.95573e+06	0.0404624277456647	1.83153e+07	0.0344827586206897	3.17715e+07	0.107142857142857	0
2	3	20002261	21002373	135102	0.135086735198923	0.0146750524109015	3.89569e+06	0.0176817288801572	4.01182e+07	0.0783132530120482	1.13874e+07	0.0586080586080586	5.86729e+07	0.00208768267223382	0	0.0100806451612903	3.54154e+06	0.0340909090909091	9.93532e+06	0.037243947858473	9.92158e+07	0.193798449612403	0	0.0427553444180523	7.64058e+06	0.240694789081886	3.97032e+07	0.0125786163522013	0	0.039832285115304	6.5648e+06	0.0193370165745856	0	0.116883116883117	3.64024e+07	0.0902777777777778	0	0.219424460431655	7.40181e+06	0.206008583690987	9.0266e+06	0.0957746478873239	1.4903e+07	0.0404624277456647	3.4427e+07	0.0367816091954023	6.72892e+07	0.107142857142857	2.38768e+07
1	3	21002374	22002486	329703	0.329665747770502	0.0125786163522013	1.38766e+06	0.0176817288801572	2.1429e+07	0.073293172690763	2.72195e+06	0.0549450549450549	7.35281e+06	0.00208768267223382	1.27171e+06	0.00806451612903226	7.29094e+06	0.0340909090909091	1.0178e+07	0.037243947858473	2.44703e+07	0.201550387596899	2.73246e+06	0.0415676959619952	1.95176e+06	0.24317617866005	1.38389e+07	0.0125786163522013	2.7826e+06	0.0377358490566038	3.37004e+06	0.0193370165745856	0	0.103896103896104	0	0.0902777777777778	0	0.219424460431655	1.51652e+06	0.206008583690987	1.84941e+06	0.0957746478873239	4.07118e+06	0.046242774566474	7.13655e+06	0.0413793103448276	1.96834e+07	0.107142857142857	9.78398e+06
5	3	23002600	24002712	499565	0.499508555533225	0.0125786163522013	133449	0.0196463654223969	1.62303e+06	0.071285140562249	1.54575e+06	0.0586080586080586	8.59644e+06	0.00208768267223382	419652	0.00806451612903226	6.80203e+06	0.0340909090909091	268690	0.0353817504655493	1.27229e+07	0.217054263565891	4.59115e+06	0.0415676959619952	1.80569e+06	0.230769230769231	3.79118e+06	0.0125786163522013	0	0.0335429769392034	1.33154e+06	0.0193370165745856	0	0.103896103896104	0	0.0902777777777778	0	0.219424460431655	1.00087e+06	0.206008583690987	0	0.0985915492957746	4.73385e+06	0.0520231213872832	4.8823e+06	0.032183908045977	7.06497e+06	0.107142857142857	0
2	3	24002713	25002825	122273	0.122259184712128	0.010482180293501	2.70809e+07	0.0157170923379175	1.32266e+07	0.071285140562249	1.26961e+07	0.0549450549450549	2.49342e+07	0.00208768267223382	0	0.00604838709677419	1.99474e+07	0.0340909090909091	1.64666e+07	0.037243947858473	5.86638e+06	0.219638242894057	7.53771e+06	0.0439429928741093	9.50979e+06	0.240694789081886	4.35353e+07	0.0125786163522013	0	0.0335429769392034	1.82962e+06	0.0193370165745856	1.46043e+07	0.103896103896104	0	0.0902777777777778	0	0.223021582733813	4.08921e+06	0.201716738197425	1.52393e+07	0.0985915492957746	1.38149e+07	0.0635838150289017	1.9707e+07	0.0367816091954023	5.5652e+07	0.142857142857143	2.82014e+07
4	3	25002826	26002938	301281	0.301246959093622	0.0125786163522013	2.43405e+07	0.0157170923379175	1.70443e+07	0.0692771084337349	8.95917e+06	0.0549450549450549	2.85081e+07	0.00208768267223382	695841	0.00604838709677419	8.09551e+06	0.0340909090909091	2.00486e+07	0.037243947858473	6.89148e+07	0.217054263565891	1.0707e+06	0.0403800475059382	9.40999e+06	0.233250620347395	4.30731e+07	0.0125786163522013	0	0.0377358490566038	8.1135e+06	0.0193370165745856	5.82309e+06	0.103896103896104	0	0.0902777777777778	0	0.219424460431655	3.33584e+06	0.210300429184549	1.46127e+07	0.0985915492957746	1.67634e+06	0.0635838150289017	2.45864e+07	0.0413793103448276	3.72059e+06	0.125	1.14454e+07
3	3	27003052	28003164	222196	0.2221708946889	0.0125786163522013	4.2005e+06	0.0157170923379175	3.537e+07	0.0672690763052209	1.10621e+07	0.0622710622710623	4.69381e+07	0.00208768267223382	4.71754e+06	0.00604838709677419	2.20614e+07	0.0340909090909091	2.11434e+07	0.037243947858473	9.17306e+07	0.209302325581395	2.45484e+07	0.0415676959619952	1.27757e+07	0.223325062034739	5.11424e+07	0.0188679245283019	0	0.0335429769392034	5.96097e+06	0.0193370165745856	1.57913e+07	0.103896103896104	0	0.0902777777777778	4.36945e+06	0.219424460431655	2.25027e+06	0.201716738197425	1.42422e+06	0.0985915492957746	1.52045e+06	0.0635838150289017	3.33373e+07	0.0413793103448276	6.67735e+07	0.125	3.00035e+07
3	3	28003165	29003277	206032	0.206008721014525	0.0125786163522013	1.62873e+07	0.0157170923379175	9.23242e+06	0.0682730923694779	1.89842e+06	0.0622710622710623	2.97768e+07	0.00208768267223382	0	0.00806451612903226	1.42057e+06	0.0340909090909091	0	0.037243947858473	2.87926e+07	0.209302325581395	1.10813e+07	0.0415676959619952	3.75764e+06	0.223325062034739	2.02234e+07	0.0188679245283019	0	0.0272536687631027	2.14288e+06	0.0193370165745856	0	0.103896103896104	0	0.0902777777777778	0	0.219424460431655	2.42681e+06	0.201716738197425	6.10518e+06	0.0957746478873239	653686	0.0635838150289017	6.7582e+07	0.0413793103448276	2.58477e+07	0.125	0
1	3	29003278	30003390	680219	0.680142143937735	0.0125786163522013	0	0.0157170923379175	399488	0.0682730923694779	953382	0.0622710622710623	2.70573e+06	0.00208768267223382	0	0.00806451612903226	0	0.0284090909090909	986654	0.037243947858473	5.28371e+06	0.20671834625323	1.36122e+06	0.0415676959619952	1.52146e+06	0.223325062034739	3.36668e+06	0.0188679245283019	0	0.0356394129979036	0	0.0193370165745856	0	0.103896103896104	0	0.0833333333333333	0	0.219424460431655	0	0.206008583690987	0	0.0985915492957746	2.4833e+06	0.0635838150289017	1.79282e+06	0.0367816091954023	3.93781e+06	0.142857142857143	0
3	3	30003391	31003503	293051	0.293017888978545	0.0167714884696017	1.89576e+07	0.0137524557956778	1.3834e+07	0.0652610441767068	4.42591e+06	0.0622710622710623	1.87264e+07	0.00208768267223382	715383	0.00806451612903226	2.88609e+07	0.0284090909090909	1.59244e+07	0.0391061452513966	2.90415e+07	0.201550387596899	6.29009e+06	0.0403800475059382	6.59609e+06	0.223325062034739	5.22969e+06	0.0188679245283019	0	0.0356394129979036	3.0065e+06	0.0193370165745856	0	0.103896103896104	0	0.0902777777777778	0	0.219424460431655	0	0.197424892703863	8.58459e+06	0.101408450704225	9.2539e+06	0.0635838150289017	1.26384e+07	0.0390804597701149	2.3569e+07	0.142857142857143	1.17668e+06
2	3	31003504	32003616	403120	0.403074452586858	0.0167714884696017	5.13238e+06	0.0137524557956778	4.71863e+06	0.0622489959839357	3.87602e+06	0.0659340659340659	304374	0.00208768267223382	520053	0.00806451612903226	486402	0.0284090909090909	3.30753e+06	0.0409683426443203	1.68537e+07	0.211886304909561	3.42947e+06	0.0391923990498812	2.88076e+06	0.218362282878412	4.71607e+06	0.0188679245283019	0	0.0356394129979036	1.62844e+06	0.0193370165745856	0	0.116883116883117	0	0.0902777777777778	0	0.219424460431655	3.72098e+06	0.214592274678112	3.16006e+06	0.0957746478873239	2.4973e+06	0.0635838150289017	6.20163e+06	0.0413793103448276	1.76664e+07	0.142857142857143	0
10	3	32003617	33003729	499218	0.499161594739794	0.0167714884696017	9.60406e+06	0.0157170923379175	1.90515e+07	0.0622489959839357	5.73814e+06	0.0659340659340659	2.9494e+07	0.00208768267223382	1.25983e+06	0.00806451612903226	1.28914e+07	0.0284090909090909	1.60251e+06	0.0391061452513966	4.62588e+07	0.217054263565891	5.56426e+06	0.0391923990498812	1.11142e+07	0.220843672456576	2.42804e+07	0.0188679245283019	0	0.0356394129979036	2.64149e+06	0.0193370165745856	0	0.103896103896104	1.4838e+07	0.0972222222222222	3.85218e+06	0.219424460431655	7.01097e+06	0.201716738197425	1.26781e+06	0.101408450704225	1.35806e+07	0.0751445086705202	2.0545e+07	0.0413793103448276	4.9782e+07	0.160714285714286	2.2257e+07
7	3	33003730	34003842	421241	0.421193405145219	0.0146750524109015	2.29208e+07	0.0157170923379175	1.73703e+07	0.0612449799196787	1.5577e+07	0.0659340659340659	4.57094e+06	0.00208768267223382	398145	0.00806451612903226	1.29274e+07	0.0284090909090909	1.42436e+07	0.0391061452513966	6.47438e+07	0.201550387596899	7.45182e+06	0.0391923990498812	1.01214e+07	0.218362282878412	4.31625e+07	0.0188679245283019	0	0.0335429769392034	8.31138e+06	0.0193370165745856	2.0465e+06	0.103896103896104	8.79236e+06	0.0972222222222222	0	0.219424460431655	1.30567e+07	0.201716738197425	600997	0.0985915492957746	1.68421e+07	0.069364161849711	2.46643e+07	0.0367816091954023	4.77597e+07	0.160714285714286	8.79236e+06
1	3	35003956	36004068	112207	0.112194322041609	0.0146750524109015	3.61301e+07	0.0157170923379175	5.82808e+07	0.0542168674698795	1.41649e+07	0.0659340659340659	5.5013e+06	0.00208768267223382	0	0.00806451612903226	2.66033e+07	0.0284090909090909	0	0.0391061452513966	7.69255e+07	0.204134366925065	1.60578e+06	0.0380047505938242	4.59979e+06	0.196029776674938	2.33651e+07	0.0125786163522013	0	0.0377358490566038	9.75066e+06	0.0193370165745856	1.48535e+07	0.103896103896104	0	0.0833333333333333	0	0.219424460431655	4.45605e+06	0.188841201716738	2.25623e+07	0.0985915492957746	1.20842e+07	0.046242774566474	5.36873e+07	0.032183908045977	7.09813e+06	0.160714285714286	3.30078e+07
3	3	36004069	37004181	305513	0.305478480931655	0.0146750524109015	5.34397e+07	0.0157170923379175	2.8618e+07	0.0522088353413655	9.99777e+06	0.0622710622710623	3.23277e+07	0.00208768267223382	684766	0.00604838709677419	1.47293e+07	0.0340909090909091	1.52749e+07	0.0391061452513966	7.44218e+07	0.209302325581395	1.18486e+07	0.0380047505938242	131436	0.198511166253102	3.41974e+07	0.0125786163522013	0	0.0356394129979036	9.29069e+06	0.0193370165745856	0	0.103896103896104	1.2836e+07	0.0833333333333333	0	0.219424460431655	8.18296e+06	0.1931330472103	6.25449e+06	0.0957746478873239	1.10955e+07	0.0520231213872832	3.27318e+07	0.032183908045977	6.17946e+07	0.160714285714286	8.48603e+07
7	3	37004182	38004294	756869	0.756783483466368	0.0167714884696017	1.65154e+07	0.0157170923379175	1.80496e+07	0.0552208835341365	8.48985e+06	0.0622710622710623	2.70812e+07	0.00208768267223382	552817	0.00604838709677419	1.11193e+07	0.0284090909090909	2.64247e+06	0.0409683426443203	4.41342e+07	0.20671834625323	7.73695e+06	0.0380047505938242	5.97457e+06	0.205955334987593	2.94161e+07	0.0125786163522013	0	0.0356394129979036	4.07429e+06	0.0193370165745856	0	0.103896103896104	0	0.0833333333333333	1.25832e+06	0.219424460431655	9.24863e+06	0.184549356223176	5.0493e+06	0.101408450704225	9.88677e+06	0.0520231213872832	6.60616e+06	0.032183908045977	2.64247e+07	0.160714285714286	4.06533e+07
15	3	38004295	39004407	670325	0.670249261833413	0.0146750524109015	6.4085e+07	0.0157170923379175	6.72938e+07	0.0451807228915663	2.00243e+07	0.0586080586080586	723026	0.00208768267223382	4.05723e+06	0.00604838709677419	3.043e+07	0.0284090909090909	3.80463e+07	0.042830540037244	1.3085e+08	0.201550387596899	2.28476e+07	0.0368171021377672	2.62467e+07	0.196029776674938	7.29082e+07	0.0125786163522013	2.76262e+06	0.0335429769392034	1.69007e+07	0.0193370165745856	1.26425e+07	0.0909090909090909	2.74007e+07	0.0833333333333333	284155	0.215827338129496	2.61067e+07	0.175965665236052	1.68885e+07	0.101408450704225	2.79081e+07	0.046242774566474	4.60436e+07	0.0252873563218391	1.20137e+08	0.160714285714286	5.16397e+07
11	3	39004408	40004520	185349	0.185328057929454	0.0125786163522013	7.16848e+07	0.0176817288801572	8.2325e+06	0.0431726907630522	2.40598e+07	0.0586080586080586	8.32597e+07	0.00208768267223382	1.12871e+06	0.00604838709677419	4.80763e+07	0.0284090909090909	5.79353e+07	0.0409683426443203	1.60491e+08	0.191214470284238	3.61288e+07	0.0368171021377672	4.11796e+07	0.188585607940447	1.01797e+08	0.0125786163522013	0	0.0335429769392034	2.94499e+07	0.0193370165745856	2.74334e+07	0.103896103896104	3.59682e+07	0.0763888888888889	0	0.219424460431655	1.89782e+07	0.171673819742489	1.72924e+07	0.0957746478873239	2.00498e+07	0.046242774566474	4.66254e+06	0.0275862068965517	1.44515e+08	0.107142857142857	1.34881e+07
7	3	40004521	41004633	369577	0.369535242517596	0.0125786163522013	1.89217e+06	0.0196463654223969	2.05876e+07	0.0431726907630522	8.50182e+06	0.0586080586080586	4.17561e+07	0.00208768267223382	1.13213e+06	0.00403225806451613	1.3395e+07	0.0284090909090909	2.54236e+07	0.0409683426443203	5.14845e+07	0.193798449612403	1.44309e+07	0.0368171021377672	5.26419e+06	0.181141439205955	2.54304e+07	0.0125786163522013	2.48238e+06	0.0335429769392034	5.31707e+06	0.0193370165745856	1.37583e+07	0.0909090909090909	0	0.0694444444444444	0	0.215827338129496	815818	0.167381974248927	8.67242e+06	0.0957746478873239	4.5706e+06	0.0520231213872832	3.38225e+06	0.0298850574712644	3.38225e+07	0.0892857142857143	6.01288e+06
2	3	41004634	42004746	723106	0.723024298254297	0.00838574423480084	4.90398e+06	0.0216110019646365	9.52426e+06	0.0411646586345382	3.03106e+06	0.0586080586080586	1.38292e+07	0.00208768267223382	578629	0.00403225806451613	9.68046e+06	0.0284090909090909	9.28136e+06	0.0409683426443203	2.41276e+07	0.191214470284238	0	0.0356294536817102	1.97304e+06	0.176178660049628	1.19576e+07	0.0125786163522013	0	0.0335429769392034	3.92533e+06	0.0193370165745856	2.38435e+06	0.0909090909090909	3.14301e+06	0.0763888888888889	0	0.215827338129496	2.77974e+06	0.171673819742489	2.67663e+06	0.0957746478873239	4.04529e+07	0.0404624277456647	8.23169e+06	0.0252873563218391	2.10535e+07	0.0714285714285714	0
14	3	42004747	43004859	253140	0.253111398411979	0.00628930817610063	5.15267e+07	0.0176817288801572	6.29457e+07	0.036144578313253	2.57515e+07	0.0586080586080586	8.83315e+07	0.00208768267223382	8.2644e+06	0.00403225806451613	5.41423e+07	0.0227272727272727	7.4737e+07	0.0391061452513966	1.70987e+08	0.198966408268734	4.36909e+07	0.0368171021377672	3.5023e+07	0.173697270471464	9.95021e+07	0.0125786163522013	3.6242e+06	0.0335429769392034	1.21284e+07	0.0193370165745856	1.3622e+07	0.0779220779220779	8.97814e+06	0.0763888888888889	0	0.212230215827338	2.56775e+07	0.163090128755365	3.27102e+07	0.0957746478873239	4.56847e+07	0.0346820809248555	5.6434e+06	0.0252873563218391	1.42261e+08	0.0714285714285714	5.6434e+06
3	3	43004860	44004972	311841	0.311805765948448	0.00628930817610063	929496	0.0176817288801572	9.7713e+06	0.034136546184739	4.47247e+06	0.0549450549450549	3.98356e+07	0.00208768267223382	1.34174e+06	0.00604838709677419	8.18052e+06	0.0170454545454545	8.60876e+06	0.037243947858473	4.83397e+07	0.191214470284238	2.96922e+06	0.0356294536817102	5.44229e+06	0.163771712158809	2.42937e+07	0.0125786163522013	0	0.0314465408805031	352391	0.0193370165745856	0	0.0779220779220779	0	0.0902777777777778	0	0.212230215827338	8.01691e+06	0.158798283261803	6.12757e+06	0.0901408450704225	7.66121e+06	0.0289017341040462	1.1318e+06	0.0206896551724138	2.66437e+07	0.0714285714285714	2.37538e+07
13	3	44004973	45005085	353965	0.353925006474268	0.00419287211740042	4.26819e+07	0.0176817288801572	4.64298e+07	0.034136546184739	2.80146e+07	0.0549450549450549	1.05943e+08	0.00208768267223382	2.95517e+06	0.00403225806451613	4.58906e+07	0.0170454545454545	3.62687e+07	0.037243947858473	1.74601e+08	0.193798449612403	3.8878e+07	0.0344418052256532	2.38796e+07	0.161290322580645	7.85941e+07	0.0125786163522013	0	0.0314465408805031	1.06255e+07	0.0193370165745856	4.87093e+06	0.0779220779220779	6.72652e+06	0.0763888888888889	2.66522e+06	0.212230215827338	2.40137e+07	0.158798283261803	3.46307e+07	0.0873239436619718	3.07498e+07	0.0289017341040462	6.20152e+07	0.0183908045977011	1.20595e+08	0.0714285714285714	1.25562e+08
12	3	45005086	46005198	498695	0.498638653832117	0.00628930817610063	2.21165e+07	0.0176817288801572	1.28469e+07	0.034136546184739	5.37369e+06	0.0549450549450549	3.75981e+06	0.00208768267223382	2.93653e+06	0.00403225806451613	9.25492e+06	0.0170454545454545	1.63693e+07	0.037243947858473	5.43354e+07	0.196382428940568	1.2937e+07	0.0344418052256532	1.64921e+07	0.168734491315136	3.14998e+07	0.0125786163522013	3.64588e+06	0.0314465408805031	5.33543e+06	0.0193370165745856	3.4573e+06	0.051948051948052	0	0.0763888888888889	1.89173e+06	0.212230215827338	1.50393e+07	0.158798283261803	7.9154e+06	0.0901408450704225	1.51598e+07	0.023121387283237	2.50654e+07	0.0183908045977011	5.41955e+07	0.0714285714285714	3.58077e+07
12	3	47005312	48005424	737714	0.737630647736806	0	2.87539e+07	0.0176817288801572	3.96e+07	0.0321285140562249	1.52546e+07	0.0476190476190476	6.69297e+07	0.00208768267223382	3.40303e+06	0.00403225806451613	2.66894e+07	0.0113636363636364	3.78075e+07	0.0335195530726257	8.79347e+07	0.191214470284238	1.23231e+07	0.0391923990498812	2.00027e+07	0.146401985111663	5.09641e+07	0.0125786163522013	6.16154e+06	0.0314465408805031	1.15236e+07	0.0193370165745856	1.60827e+07	0.051948051948052	1.46545e+06	0.0902777777777778	1.3034e+06	0.212230215827338	2.37219e+06	0.150214592274678	1.70564e+07	0.0816901408450704	2.46885e+07	0.0289017341040462	3.56721e+07	0.0114942528735632	9.28117e+07	0.0892857142857143	3.12817e+07
24	3	48005425	49005537	527837	0.527777361158189	0	6.41004e+06	0.0176817288801572	7.48257e+07	0.0311244979919679	2.17761e+07	0.0476190476190476	8.99299e+07	0.00208768267223382	8.32322e+06	0.00403225806451613	5.15787e+07	0.0113636363636364	4.86432e+07	0.0335195530726257	1.32329e+08	0.180878552971576	2.52603e+07	0.0380047505938242	2.60033e+07	0.141439205955335	1.23588e+08	0.0125786163522013	1.72229e+06	0.0335429769392034	1.88614e+07	0.0193370165745856	9.79926e+06	0.051948051948052	1.02407e+07	0.0972222222222222	546497	0.212230215827338	3.9785e+07	0.145922746781116	2.74207e+07	0.0816901408450704	3.53994e+07	0.0346820809248555	6.91245e+07	0.0137931034482759	1.51447e+08	0.0535714285714286	6.55797e+07
33	3	49005538	50005650	507976	0.507918605197613	0	9.01647e+07	0.0176817288801572	8.71256e+07	0.0291164658634538	3.8294e+07	0.0476190476190476	2.06891e+08	0.00208768267223382	1.23552e+07	0.00403225806451613	9.53539e+07	0.0113636363636364	7.58176e+07	0.0335195530726257	2.38281e+08	0.180878552971576	7.15089e+07	0.0415676959619952	4.83059e+06	0.133995037220844	1.88368e+07	0.0125786163522013	9.03026e+06	0.0356394129979036	3.34618e+07	0.0193370165745856	1.6683e+07	0.051948051948052	1.51431e+07	0.0972222222222222	1.68737e+07	0.212230215827338	4.55053e+07	0.145922746781116	4.98711e+06	0.0845070422535211	6.56199e+07	0.0346820809248555	8.20249e+07	0.0160919540229885	2.45046e+08	0.0535714285714286	6.56199e+07
21	3	50005651	51005763	708645	0.708564932162666	0	2.35191e+07	0.0157170923379175	2.17403e+07	0.0261044176706827	1.23678e+07	0.043956043956044	6.69847e+07	0.00208768267223382	2.65697e+06	0.00403225806451613	1.91092e+07	0.0113636363636364	2.01592e+07	0.0353817504655493	6.76365e+07	0.17312661498708	1.39898e+07	0.0368171021377672	1.14817e+06	0.136476426799007	6.0557e+07	0.0125786163522013	1.30661e+06	0.0314465408805031	9.63556e+06	0.0193370165745856	7.17531e+06	0.051948051948052	117595	0.111111111111111	0	0.212230215827338	2.69465e+07	0.150214592274678	9.40763e+06	0.0873239436619718	1.97363e+07	0.0289017341040462	2.98129e+07	0.0137931034482759	7.48334e+07	0.0714285714285714	1.69337e+07
16	3	51005764	52005876	565042	0.564978157468206	0.00209643605870021	2.33227e+07	0.0176817288801572	3.8945e+07	0.0251004016064257	1.59508e+06	0.043956043956044	5.52352e+07	0.00208768267223382	3.70247e+06	0.00403225806451613	2.10906e+07	0.0113636363636364	2.39159e+07	0.0353817504655493	1.07658e+08	0.178294573643411	2.38536e+07	0.0368171021377672	1.39353e+07	0.141439205955335	4.68677e+07	0.0125786163522013	1.63869e+06	0.0314465408805031	6.67101e+06	0.0193370165745856	9.15403e+06	0.051948051948052	0	0.125	6.87293e+06	0.212230215827338	2.40121e+07	0.141630901287554	1.66288e+07	0.0816901408450704	1.59772e+07	0.023121387283237	4.67025e+07	0.0114942528735632	1.05014e+08	0.0535714285714286	3.27737e+07
29	3	52005877	53005989	655101	0.655026981951039	0.00209643605870021	7.69251e+07	0.0216110019646365	6.43851e+07	0.0271084337349398	3.14468e+07	0.043956043956044	1.29164e+08	0.00208768267223382	6.38695e+06	0.00403225806451613	5.4346e+07	0.0113636363636364	6.64591e+07	0.037243947858473	1.8605e+08	0.180878552971576	4.56582e+07	0.0368171021377672	3.37664e+06	0.136476426799007	1.232e+08	0.0125786163522013	7.00221e+06	0.0314465408805031	2.34061e+07	0.0193370165745856	6.25607e+07	0.0649350649350649	3.3005e+07	0.125	8.89213e+06	0.212230215827338	4.986e+07	0.145922746781116	3.23493e+07	0.0816901408450704	5.07048e+06	0.0346820809248555	5.5123e+07	0.0160919540229885	1.69815e+08	0.0535714285714286	7.0453e+07
7	3	53005990	54006102	437104	0.43705461282875	0.00209643605870021	1.63413e+07	0.0176817288801572	2.1667e+07	0.0271084337349398	1.33808e+07	0.043956043956044	4.39959e+07	0.00208768267223382	2.8717e+06	0.00403225806451613	2.97889e+07	0.0113636363636364	2.17884e+07	0.037243947858473	7.07768e+07	0.191214470284238	2.07039e+07	0.0356294536817102	1.55713e+07	0.138957816377171	5.92133e+07	0.0125786163522013	839554	0.0314465408805031	6.07377e+06	0.0193370165745856	1.38654e+07	0.0649350649350649	0	0.125	4.4423e+06	0.212230215827338	2.64417e+07	0.15450643776824	1.37267e+07	0.0816901408450704	1.11989e+07	0.0346820809248555	2.61461e+07	0.0114942528735632	7.64871e+07	0.0535714285714286	2.98407e+07
2	3	54006103	55006215	858929	0.858831951989425	0.00209643605870021	5.41507e+06	0.0117878192534381	8.63585e+06	0.0281124497991968	2.16216e+06	0.0476190476190476	6.048e+06	0.00208768267223382	121782	0.00403225806451613	1.83827e+06	0.0113636363636364	3.168e+06	0.037243947858473	1.54054e+06	0.188630490956072	522081	0.0391923990498812	1.82626e+06	0.143920595533499	407711	0.0125786163522013	0	0.0356394129979036	776160	0.0193370165745856	0	0.0779220779220779	0	0.125	0	0.212230215827338	1.17009e+06	0.158798283261803	232848	0.076056338028169	2.82975e+06	0.0289017341040462	1.55232e+06	0.0160919540229885	1.53373e+06	0.0357142857142857	9.702e+06
1	3	55006216	56006328	102017	0.102005473381508	0.00419287211740042	2.3908e+07	0.0117878192534381	1.62469e+07	0.0281124497991968	9.85862e+06	0.043956043956044	5.72861e+07	0.00208768267223382	0	0.00403225806451613	4.12728e+07	0.0113636363636364	4.66776e+07	0.037243947858473	1.08207e+08	0.193798449612403	1.31281e+07	0.0380047505938242	5.11201e+06	0.148883374689826	3.45963e+07	0.0125786163522013	899292	0.0356394129979036	8.69383e+06	0.0193370165745856	1.3806e+07	0.0909090909090909	0	0.125	0	0.215827338129496	9.85155e+06	0.158798283261803	1.30697e+07	0.0788732394366197	1.36617e+07	0.0289017341040462	1.93285e+08	0.0160919540229885	6.14472e+07	0.0535714285714286	4.26186e+07
3	3	56006329	57006441	593170	0.593102979363332	0.00419287211740042	7.90246e+06	0.0117878192534381	9.28847e+06	0.0261044176706827	4.31043e+06	0.043956043956044	3.3056e+07	0.00208768267223382	352690	0.00403225806451613	1.06475e+07	0.0113636363636364	8.02789e+06	0.0391061452513966	3.77485e+07	0.209302325581395	6.83456e+06	0.0356294536817102	5.91145e+06	0.141439205955335	1.96793e+07	0.0125786163522013	0	0.0377358490566038	2.61084e+06	0.0193370165745856	4.43647e+06	0.0909090909090909	7.66299e+06	0.125	0	0.212230215827338	5.93015e+06	0.141630901287554	2.21823e+06	0.0788732394366197	9.43137e+06	0.0289017341040462	936587	0.0229885057471264	3.27107e+07	0.0714285714285714	2.93193e+07
11	3	57006442	58006554	448208	0.448157358218521	0.00628930817610063	1.40542e+07	0.0117878192534381	1.042e+07	0.0271084337349398	1.84336e+07	0.043956043956044	4.66637e+07	0.00208768267223382	2.33379e+08	0.00403225806451613	1.04583e+07	0.0113636363636364	1.95976e+07	0.0409683426443203	1.04765e+08	0.209302325581395	896427	0.0368171021377672	1.36717e+07	0.141439205955335	5.57777e+07	0.0125786163522013	0	0.0356394129979036	4.44247e+06	0.0193370165745856	5.72079e+06	0.0909090909090909	4.74704e+06	0.125	4.37472e+06	0.212230215827338	1.12116e+07	0.145922746781116	2.04154e+07	0.0816901408450704	2.64312e+07	0.0289017341040462	2.16913e+07	0.0183908045977011	5.19482e+07	0.0892857142857143	0
10	3	58006555	59006667	367566	0.36752446973492	0.00419287211740042	3.26472e+06	0.0117878192534381	3.27067e+07	0.0281124497991968	1.70037e+07	0.0476190476190476	7.46831e+07	0.00208768267223382	4.55331e+06	0.00403225806451613	2.11446e+07	0.0113636363636364	3.14627e+07	0.0409683426443203	8.32114e+07	0.209302325581395	2.196e+07	0.0380047505938242	1.8824e+07	0.141439205955335	6.6712e+07	0.0125786163522013	2.49596e+06	0.039832285115304	1.15641e+07	0.0193370165745856	1.03314e+07	0.103896103896104	1.1577e+07	0.125	0	0.219424460431655	1.64885e+07	0.141630901287554	1.23664e+07	0.0845070422535211	2.49069e+07	0.0289017341040462	2.68228e+07	0.0160919540229885	9.20322e+07	0.0714285714285714	2.47327e+07
1	3	59006668	60006780	268830	0.268799625642302	0.00209643605870021	2.88358e+06	0.0137524557956778	3.00794e+06	0.0291164658634538	523919	0.0402930402930403	0	0.00208768267223382	77820.6	0.00604838709677419	0	0.0113636363636364	2.5654e+06	0.0465549348230912	4.95976e+06	0.201550387596899	3.23463e+06	0.0380047505938242	971233	0.129032258064516	5.61483e+06	0.0125786163522013	0	0.0377358490566038	83217.5	0.0220994475138122	0	0.103896103896104	0	0.125	0	0.215827338129496	0	0.141630901287554	2.36931e+06	0.076056338028169	0	0.0289017341040462	1.52869e+07	0.0206896551724138	1.11372e+06	0.0714285714285714	0
1	3	60006781	61006893	515914	0.515855708304962	0.00209643605870021	0	0.0137524557956778	0	0.0271084337349398	270713	0.0402930402930403	0	0.00208768267223382	0	0.00403225806451613	950151	0.0113636363636364	0	0.0391061452513966	1.2425e+06	0.196382428940568	0	0.0380047505938242	0	0.116625310173697	0	0.0125786163522013	0	0.0356394129979036	0	0.0220994475138122	0	0.0909090909090909	0	0.125	0	0.215827338129496	0	0.141630901287554	0	0.076056338028169	0	0.0289017341040462	0	0.0183908045977011	1.1076e+06	0.0714285714285714	0
1	3	61006894	62007006	459046	0.458994133662896	0.00419287211740042	1.67572e+06	0.0235756385068762	2.40711e+06	0.0281124497991968	1.22902e+06	0.043956043956044	1.47191e+06	0.00208768267223382	0	0.00604838709677419	0	0.0227272727272727	3.00473e+06	0.0484171322160149	2.82913e+06	0.209302325581395	2.84143e+06	0.0391923990498812	283650	0.141439205955335	1.69528e+06	0.0125786163522013	0	0.0356394129979036	0	0.0220994475138122	0	0.116883116883117	0	0.145833333333333	0	0.215827338129496	0	0.150214592274678	0	0.0929577464788732	1.55602e+06	0.0404624277456647	0	0.0390804597701149	3.23209e+06	0.0892857142857143	0
4	3	62007007	63007119	763303	0.763216756506515	0.010482180293501	2.06314e+07	0.0216110019646365	1.36394e+07	0.0301204819277108	5.92134e+06	0.043956043956044	187157	0.00208768267223382	0	0.00604838709677419	7.46687e+06	0.0227272727272727	7.17861e+06	0.0502793296089385	3.06439e+07	0.219638242894057	6.34848e+06	0.0391923990498812	5.12423e+06	0.136476426799007	2.13271e+07	0.0125786163522013	0	0.0356394129979036	4.66849e+06	0.0220994475138122	2.62019e+06	0.12987012987013	0	0.145833333333333	131010	0.215827338129496	396999	0.141630901287554	5.80422e+06	0.0873239436619718	9.72156e+06	0.046242774566474	1.07679e+07	0.0436781609195402	2.62019e+07	0.0714285714285714	1.63762e+07
5	3	63007120	64007232	475774	0.475720243612472	0.00419287211740042	8.34063e+06	0.0275049115913556	5.19685e+06	0.0301204819277108	5.32111e+06	0.043956043956044	1.13613e+07	0.00208768267223382	439715	0.00806451612903226	7.58395e+06	0.0227272727272727	4.31885e+06	0.0484171322160149	2.25036e+07	0.237726098191214	4.79872e+06	0.0391923990498812	3.57175e+06	0.138957816377171	8.21031e+06	0.0125786163522013	0	0.0356394129979036	234580	0.0220994475138122	0	0.12987012987013	4.042e+06	0.145833333333333	0	0.215827338129496	2.1124e+06	0.141630901287554	1.32191e+06	0.0873239436619718	7.45333e+06	0.046242774566474	2.87923e+06	0.0436781609195402	2.26729e+07	0.0892857142857143	0
3	3	64007233	65007345	267226	0.267195806873823	0.00419287211740042	5.2624e+07	0.0255402750491159	3.38331e+07	0.0291164658634538	1.30844e+07	0.043956043956044	3.53987e+07	0.00208768267223382	1.56575e+06	0.00403225806451613	3.05482e+06	0.0227272727272727	2.05049e+07	0.0521415270018622	5.87477e+07	0.242894056847545	1.34852e+07	0.0415676959619952	1.66536e+07	0.141439205955335	4.09298e+07	0.0125786163522013	3.43317e+06	0.0356394129979036	1.09321e+07	0.0220994475138122	7.33755e+06	0.12987012987013	7.06066e+06	0.138888888888889	0	0.215827338129496	5.64143e+06	0.141630901287554	7.10535e+06	0.0816901408450704	2.62607e+07	0.0520231213872832	2.99372e+06	0.0367816091954023	6.74457e+07	0.125	3.25404e+07
1	3	65007346	66007458	660636	0.660561356566708	0.00209643605870021	5.95942e+06	0.0255402750491159	4.97652e+06	0.0311244979919679	2.55117e+06	0.0476190476190476	1.1327e+07	0.00417536534446764	634672	0.00403225806451613	4.65752e+06	0.0170454545454545	4.11889e+06	0.0521415270018622	1.43231e+06	0.250645994832041	3.40922e+06	0.0391923990498812	2.37442e+06	0.141439205955335	9.351e+06	0.0125786163522013	0	0.0356394129979036	680311	0.0248618784530387	0	0.12987012987013	0	0.138888888888889	0	0.215827338129496	3.0426e+06	0.141630901287554	1.91607e+06	0.076056338028169	158779	0.046242774566474	204553	0.0367816091954023	1.40809e+07	0.0892857142857143	5.8219e+06
3	3	66007459	67007571	271200	0.271169357862562	0.00209643605870021	5.8068e+06	0.0235756385068762	6.01193e+06	0.0311244979919679	4.67406e+06	0.043956043956044	1.49486e+07	0.00417536534446764	1.54604e+06	0.00403225806451613	3.78186e+06	0.0227272727272727	1.76789e+07	0.0540037243947858	3.01329e+07	0.242894056847545	4.93837e+06	0.0380047505938242	3.35646e+06	0.143920595533499	2.16054e+07	0.0125786163522013	0	0.0377358490566038	3.32191e+06	0.0220994475138122	3.23449e+06	0.12987012987013	6.9572e+06	0.138888888888889	0	0.215827338129496	7.41169e+06	0.163090128755365	2.33374e+06	0.076056338028169	9.0249e+06	0.0404624277456647	4.91642e+06	0.0367816091954023	3.61293e+07	0.160714285714286	1.60318e+07
2	3	67007572	68007684	288873	0.288840361039203	0.00209643605870021	2.70448e+06	0.0275049115913556	7.56662e+06	0.0321285140562249	3.39385e+06	0.043956043956044	1.62632e+07	0.00208768267223382	724211	0.00403225806451613	8.65432e+06	0.0227272727272727	4.74209e+06	0.0521415270018622	1.63079e+06	0.248062015503876	3.13279e+06	0.0380047505938242	2.2508e+06	0.136476426799007	8.08186e+06	0.0125786163522013	3.1759e+06	0.0335429769392034	0	0.0220994475138122	2.93367e+06	0.12987012987013	0	0.138888888888889	3.42745e+06	0.215827338129496	1.73956e+06	0.150214592274678	4.27374e+06	0.0732394366197183	2.41235e+06	0.0404624277456647	0	0.0390804597701149	1.60544e+06	0.125	0
7	3	69007798	70007910	355104	0.355063877781811	0.00419287211740042	2.92872e+07	0.0255402750491159	1.99504e+07	0.03714859437751	1.02979e+07	0.0476190476190476	5.10296e+07	0.00208768267223382	1.17827e+06	0.0100806451612903	8.49068e+06	0.0340909090909091	1.33193e+07	0.0521415270018622	6.48478e+06	0.237726098191214	3.77153e+06	0.0368171021377672	1.1688e+07	0.136476426799007	4.56661e+07	0.0125786163522013	0	0.0314465408805031	3.90218e+06	0.0248618784530387	2.36645e+06	0.12987012987013	0	0.131944444444444	0	0.219424460431655	1.83965e+07	0.150214592274678	1.04947e+07	0.076056338028169	1.77236e+07	0.0404624277456647	1.92882e+07	0.0459770114942529	4.32615e+07	0.125	1.22438e+07
4	3	71008024	72008136	267550	0.26751977026596	0.00419287211740042	9.04263e+06	0.0353634577603143	1.94029e+07	0.035140562248996	3.61872e+06	0.043956043956044	1.72127e+07	0.00208768267223382	0	0.0100806451612903	7.66691e+06	0.0340909090909091	1.01017e+07	0.0502793296089385	3.34e+07	0.24031007751938	4.96144e+06	0.0380047505938242	3.87318e+06	0.138957816377171	1.73843e+07	0.0125786163522013	0	0.0356394129979036	4.75524e+06	0.0248618784530387	6.02842e+06	0.12987012987013	0	0.131944444444444	0	0.219424460431655	3.7564e+06	0.137339055793991	0	0.076056338028169	655723	0.046242774566474	2.56001e+07	0.0528735632183908	4.24977e+07	0.125	2.9901e+07
2	3	72008137	73008249	168923	0.168903913857734	0.00419287211740042	9.62578e+06	0.0353634577603143	1.4557e+07	0.036144578313253	8.18791e+06	0.043956043956044	1.96022e+07	0	123588	0.00604838709677419	2.44118e+07	0.0227272727272727	1.58922e+07	0.0484171322160149	3.38636e+07	0.242894056847545	2.59643e+06	0.0368171021377672	6.11082e+06	0.141439205955335	1.82853e+07	0.0125786163522013	0	0.0377358490566038	8.66321e+06	0.0248618784530387	0	0.12987012987013	0	0.138888888888889	0	0.219424460431655	1.4874e+07	0.141630901287554	3.63181e+06	0.076056338028169	8.27952e+06	0.0520231213872832	3.28881e+07	0.0436781609195402	2.56641e+07	0.0892857142857143	2.57385e+06
4	3	73008250	74008362	327025	0.32698805035031	0.00628930817610063	3.79075e+07	0.0294695481335953	3.05787e+07	0.0381526104417671	7.18008e+06	0.043956043956044	1.82257e+07	0	638386	0.00806451612903226	1.58439e+07	0.0284090909090909	2.25749e+07	0.0521415270018622	4.8043e+07	0.248062015503876	9.5987e+06	0.0368171021377672	5.93377e+06	0.146401985111663	1.41132e+06	0.0125786163522013	2.80539e+06	0.0356394129979036	8.57347e+06	0.0248618784530387	0	0.142857142857143	5.55976e+06	0.138888888888889	3.02759e+06	0.223021582733813	3.07324e+06	0.150214592274678	3.77515e+06	0.076056338028169	1.06546e+07	0.0520231213872832	1.23968e+06	0.0367816091954023	3.40734e+07	0.0892857142857143	1.32951e+06
1	3	74008363	75008475	256712	0.256682994821585	0.00628930817610063	4.47015e+07	0.031434184675835	3.23748e+07	0.040160642570281103	6.94656e+06	0.0476190476190476	1.02511e+07	0	0	0.00604838709677419	7.9906e+06	0.0340909090909091	1.57922e+07	0.0502793296089385	2.71773e+07	0.248062015503876	3.52526e+06	0.0380047505938242	4.52955e+06	0.146401985111663	1.34841e+07	0.0125786163522013	0	0.0335429769392034	1.791e+06	0.0248618784530387	2.90703e+06	0.142857142857143	0	0.138888888888889	0	0.223021582733813	1.9575e+06	0.145922746781116	7.16948e+06	0.0732394366197183	8.08737e+06	0.046242774566474	3.20171e+07	0.0390804597701149	4.79951e+07	0.0714285714285714	3.38732e+07
1	3	77008702	78008814	605270	0.605201612217819	0.0125786163522013	655617	0.0255402750491159	2.01056e+07	0.0441767068273092	3.12993e+06	0.0512820512820513	7.55888e+06	0	345639	0.00806451612903226	7.5098e+06	0.0340909090909091	5.58161e+06	0.0540037243947858	2.95908e+07	0.237726098191214	5.82257e+06	0.0368171021377672	4.68999e+06	0.143920595533499	1.50196e+07	0.0125786163522013	0	0.0335429769392034	4.18749e+06	0.0276243093922652	2.31071e+06	0.12987012987013	0	0.145833333333333	0	0.223021582733813	1.66046e+06	0.141630901287554	5.06796e+06	0.076056338028169	9.05291e+06	0.0520231213872832	2.67917e+07	0.0390804597701149	2.17763e+06	0.0535714285714286	1.27089e+07
1	3	78008815	79008927	360866	0.360825226749377	0.0167714884696017	1.96378e+07	0.0255402750491159	1.39658e+07	0.0431726907630522	5.58692e+06	0.0512820512820513	2.51919e+07	0	115946	0.00604838709677419	6.96259e+06	0.0340909090909091	1.68514e+06	0.0540037243947858	4.96319e+07	0.237726098191214	6.077e+06	0.0368171021377672	2.8605e+06	0.141439205955335	1.63608e+07	0.0125786163522013	2.5423e+06	0.0356394129979036	378740	0.0303867403314917	183517	0.12987012987013	0	0.145833333333333	0	0.223021582733813	2.78504e+06	0.15450643776824	0	0.0788732394366197	1.04035e+07	0.0520231213872832	4.55525e+07	0.0390804597701149	3.16698e+07	0.0714285714285714	1.10844e+07
1	3	79008928	80009040	58683	0.0586763695702386	0.0188679245283019	0	0.0235756385068762	1.79376e+07	0.0491967871485944	2.27817e+06	0.0512820512820513	1.09235e+07	0	0	0.0100806451612903	8.65011e+06	0.0340909090909091	0	0.0558659217877095	1.45027e+07	0.253229974160207	0	0.0356294536817102	4.38065e+06	0.156327543424318	0	0.0125786163522013	0	0.0335429769392034	0	0.0303867403314917	0	0.116883116883117	0	0.145833333333333	0	0.223021582733813	0	0.150214592274678	0	0.0732394366197183	1.1553e+07	0.0520231213872832	2.36677e+07	0.0344827586206897	1.44822e+07	0.0535714285714286	0
1	3	81009154	82009266	271111	0.271080367918425	0.0293501048218029	5.67466e+06	0.0412573673870334	2.88918e+06	0.0552208835341365	5.8548e+06	0.0549450549450549	2.39515e+06	0	770047	0.0141129032258065	3.68853e+06	0.0227272727272727	9.83607e+06	0.0558659217877095	1.49429e+07	0.258397932816537	0	0.0356294536817102	1.89641e+06	0.161290322580645	6.856e+06	0.0125786163522013	0	0.0314465408805031	1.66902e+06	0.0303867403314917	0	0.12987012987013	0	0.145833333333333	3.6162e+06	0.223021582733813	7.41412e+06	0.167381974248927	4.5258e+06	0.0816901408450704	2.51777e+06	0.0520231213872832	1.9938e+07	0.0413793103448276	7.35603e+06	0.0892857142857143	0
1	3	85009606	86009718	234088	0.234061551044732	0.050314465408805	5.81211e+06	0.0412573673870334	6.64026e+06	0.0652610441767068	163884	0.0512820512820513	0	0	0	0.0282258064516129	1.0123e+07	0.0397727272727273	573409	0.0521415270018622	9.95569e+06	0.281653746770026	5.69586e+06	0.0356294536817102	0	0.173697270471464	7.60124e+06	0.0188679245283019	0	0.0293501048218029	945110	0.0414364640883978	0	0.116883116883117	0	0.118055555555556	0	0.226618705035971	2.14668e+06	0.206008583690987	0	0.0873239436619718	1.01367e+07	0.0578034682080925	5.40747e+06	0.0459770114942529	8.35287e+06	0.0892857142857143	0
2	3	86009719	87009831	119873	0.119859455881485	0.0670859538784067	2.83747e+06	0.0471512770137525	2.1668e+06	0.0682730923694779	4.26164e+06	0.0549450549450549	3.16791e+07	0	0	0.032258064516129	1.16402e+07	0.0340909090909091	1.09765e+07	0.0595903165735568	2.13446e+07	0.299741602067183	1.12226e+07	0.0332541567695962	1.06134e+06	0.1712158808933	1.80047e+07	0.0188679245283019	0	0.0440251572327044	373251	0.0414364640883978	0	0.12987012987013	0	0.104166666666667	7.79641e+06	0.226618705035971	0	0.227467811158798	1.60426e+07	0.0873239436619718	2.8183e+06	0.0404624277456647	3.16791e+07	0.0574712643678161	1.18161e+06	0.107142857142857	0
3	3	87009832	88009944	72930	0.072921759841138	0.0838574423480084	6.35645e+07	0.0530451866404715	8.90375e+07	0.0753012048192771	1.38154e+07	0.0622710622710623	4.36681e+07	0	5.72517e+06	0.0282258064516129	2.44853e+07	0.0340909090909091	3.60836e+07	0.0558659217877095	1.07486e+08	0.310077519379845	2.51592e+07	0.0356294536817102	1.91895e+07	0.183622828784119	2.45731e+07	0.0188679245283019	0	0.0461215932914046	9.26472e+06	0.0359116022099447	0	0.12987012987013	0	0.104166666666667	1.28147e+07	0.23021582733813	2.75614e+07	0.214592274678112	8.7896e+06	0.0873239436619718	1.8467e+07	0.0520231213872832	0	0.0528735632183908	7.31808e+07	0.125	0
4	3	88009945	89010057	10530	0.0105288102444424	0.111111111111111	5.47885e+08	0.0609037328094303	5.41261e+08	0.0833333333333333	1.19155e+08	0.0659340659340659	1.06838e+09	0	0	0.032258064516129	4.40774e+08	0.0340909090909091	3.72419e+08	0.0558659217877095	1.19958e+09	0.330749354005168	1.76682e+08	0.0344418052256532	2.41954e+08	0.183622828784119	3.71756e+08	0.0188679245283019	0	0.039832285115304	1.0599e+08	0.0359116022099447	1.4104e+08	0.12987012987013	1.58278e+08	0.0972222222222222	0	0.226618705035971	2.37417e+08	0.218884120171674	6.12689e+07	0.0901408450704225	1.27472e+08	0.0809248554913295	3.43253e+08	0.0528735632183908	7.1623e+08	0.160714285714286	0
1	3	89010058	90010170	371754	0.37171199654439	0.119496855345912	2.50228e+07	0.0609037328094303	2.9432e+07	0.0823293172690763	3.66206e+06	0.0805860805860806	1.362e+07	0	1.12315e+06	0.0443548387096774	1.77848e+07	0.0340909090909091	1.73545e+06	0.0577281191806331	2.8375e+07	0.372093023255814	3.9174e+06	0.0332541567695962	4.78517e+06	0.19106699751861	2.09113e+07	0.0188679245283019	2.44541e+06	0.0356394129979036	29822.1	0.0359116022099447	2.57412e+06	0.12987012987013	4.55924e+06	0.104166666666667	0	0.233812949640288	2.67657e+06	0.227467811158798	3.405e+06	0.0901408450704225	1.43944e+07	0.092485549132948	2.91681e+07	0.0482758620689655	2.93984e+07	0.142857142857143	3.10379e+07
4	3	93010510	94010622	236594	0.236567267898727	0.490566037735849	5.09747e+07	0.0884086444007859	5.13618e+07	0.117469879518072	1.08112e+07	0.424908424908425	3.1628e+07	0	2.64717e+06	0.308467741935484	1.66841e+07	0.0511363636363636	1.07004e+06	0.0651769087523277	6.44145e+07	0.490956072351421	4.69628e+06	0.0427553444180523	6.00687e+06	0.280397022332506	4.74732e+07	0	9.71644e+06	0.0482180293501048	3.75702e+06	0.0524861878453039	6.84478e+06	0.155844155844156	0	0.104166666666667	3.84241e+06	0.287769784172662	1.34893e+07	0.158798283261803	4.8863e+06	0.0901408450704225	1.36344e+07	0.364161849710983	2.69786e+07	0.0896551724137931	5.80584e+07	0.25	2.48626e+07
1	3	96010849	97010961	477495	0.477441049161445	0.49895178197065	1.27222e+07	0.0923379174852652	1.27246e+07	0.1285140562249	513300	0.432234432234432	5.69867e+06	0	437216	0.310483870967742	1.31302e+06	0.0511363636363636	2.65097e+06	0.0707635009310987	1.0077e+07	0.493540051679587	0	0.0403800475059382	135639	0.267990074441687	223587	0	0	0.0482180293501048	0	0.0580110497237569	1.70265e+06	0.155844155844156	0	0.0972222222222222	186988	0.284172661870504	1.11397e+06	0.15450643776824	0	0.0957746478873239	3.422e+06	0.335260115606936	0	0.0942528735632184	1.15705e+07	0.214285714285714	0
8	3	97010962	98011074	492195	0.492139388249128	0.50104821802935	8.76237e+06	0.0903732809430255	4.69643e+07	0.123493975903614	1.51324e+07	0.443223443223443	3.52728e+07	0.00208768267223382	1.70018e+06	0.310483870967742	2.80237e+07	0.0511363636363636	1.41449e+07	0.0651769087523277	7.30742e+07	0.493540051679587	8.12686e+06	0.0403800475059382	1.81591e+07	0.270471464019851	3.1927e+07	0	0	0.0461215932914046	4.97748e+06	0.0580110497237569	6.47559e+06	0.155844155844156	0	0.0972222222222222	0	0.280575539568345	8.59985e+06	0.158798283261803	1.33029e+07	0.104225352112676	2.33915e+07	0.352601156069364	3.75426e+07	0.0942528735632184	5.93283e+07	0.25	1.90473e+07
9	3	98011075	99011187	149757	0.149740079371031	0.494758909853249	1.43535e+08	0.0884086444007859	1.31859e+08	0.126506024096386	2.53368e+06	0.443223443223443	4.17343e+07	0	557619	0.30241935483871	3.09143e+07	0.0511363636363636	2.95838e+07	0.0707635009310987	1.7043e+07	0.509043927648579	3.17975e+07	0.0391923990498812	3.89736e+07	0.267990074441687	8.76124e+07	0	0	0.0377358490566038	8.84435e+06	0.0607734806629834	1.86225e+07	0.155844155844156	0	0.0972222222222222	0	0.280575539568345	1.75723e+07	0.150214592274678	3.95117e+06	0.0985915492957746	3.05506e+07	0.358381502890173	6.46208e+07	0.096551724137931	1.06693e+07	0.25	1.4607e+08
4	3	99011188	100011300	495088	0.495032061377064	0.49895178197065	1.62736e+07	0.0903732809430255	8.6492e+06	0.1285140562249	4.21317e+06	0.450549450549451	2.25996e+07	0	1.26504e+06	0.308467741935484	6.2728e+06	0.0511363636363636	7.71914e+06	0.0707635009310987	2.70439e+07	0.511627906976744	3.60686e+06	0.0391923990498812	3.65346e+06	0.255583126550869	1.48831e+07	0	0	0.039832285115304	4.03073e+06	0.0580110497237569	2.40457e+06	0.155844155844156	0	0.104166666666667	180343	0.276978417266187	423004	0.145922746781116	2.34865e+06	0.101408450704225	264897	0.352601156069364	4.29754e+06	0.0988505747126437	2.34346e+07	0.232142857142857	6.31201e+06
7	3	100011301	101011413	443051	0.443000940893679	0.50314465408805	4.7067e+07	0.0962671905697446	3.7236e+07	0.132530120481928	1.19672e+07	0.450549450549451	4.92742e+07	0	1.41362e+06	0.306451612903226	1.82248e+07	0.0511363636363636	2.58773e+06	0.0707635009310987	7.08288e+07	0.521963824289406	1.76759e+07	0.0415676959619952	1.29144e+07	0.258064516129032	4.02486e+07	0	5.57303e+06	0.0377358490566038	401258	0.0607734806629834	8.95665e+06	0.155844155844156	3.76179e+06	0.104166666666667	0	0.276978417266187	1.058e+07	0.163090128755365	9.40449e+06	0.101408450704225	962033	0.364161849710983	2.66966e+07	0.101149425287356	4.81426e+07	0.267857142857143	1.45618e+07
9	3	101011414	102011526	353007	0.352967114716037	0.505241090146751	3.11744e+07	0.0962671905697446	3.65755e+07	0.136546184738956	1.71367e+07	0.450549450549451	4.75436e+07	0	591400	0.310483870967742	1.7705e+07	0.0511363636363636	2.7065e+07	0.0707635009310987	7.3925e+07	0.521963824289406	1.54517e+07	0.0415676959619952	1.65554e+07	0.258064516129032	5.22361e+07	0	0	0.0356394129979036	8.73552e+06	0.0607734806629834	1.22681e+07	0.155844155844156	4.72134e+06	0.104166666666667	2.52929e+06	0.284172661870504	1.79861e+07	0.15450643776824	8.38108e+06	0.104225352112676	1.67732e+07	0.358381502890173	4.21907e+07	0.096551724137931	6.00898e+07	0.267857142857143	4.56904e+07
2	3	105011866	106011978	413139	0.413092320567776	0.530398322851153	1.33127e+07	0.0962671905697446	1.29011e+07	0.130522088353414	5.0613e+06	0.461538461538462	2.07471e+07	0	1.51597e+06	0.324596774193548	7.63562e+06	0.0568181818181818	4.65479e+06	0.068901303538175	2.33423e+07	0.532299741602067	445489	0.0415676959619952	5.3301e+06	0.253101736972705	1.60802e+07	0	0	0.0419287211740042	3.24898e+06	0.0580110497237569	1.89101e+06	0.168831168831169	0	0.104166666666667	0	0.284172661870504	3.84205e+06	0.15450643776824	1.44077e+06	0.101408450704225	31640.4	0.364161849710983	7.72498e+06	0.110344827586207	1.54214e+07	0.267857142857143	1.51281e+07
4	3	107012092	108012204	199455	0.199432464131553	0.528301886792453	4.73928e+07	0.102161100196464	3.69026e+07	0.130522088353414	1.16883e+06	0.476190476190476	2.21191e+06	0	2.09339e+06	0.328629032258065	1.27331e+06	0.0568181818181818	6.42777e+06	0.0670391061452514	5.74482e+07	0.555555555555556	6.42777e+06	0.0415676959619952	8.46462e+06	0.253101736972705	2.80485e+07	0	0	0.039832285115304	5.59561e+06	0.0580110497237569	7.83385e+06	0.168831168831169	0	0.0972222222222222	4.47648e+06	0.284172661870504	5.27754e+06	0.150214592274678	8.84764e+06	0.0985915492957746	2.45768e+07	0.369942196531792	1.06674e+07	0.117241379310345	4.20139e+07	0.267857142857143	1.56677e+07
7	3	108012205	109012317	495871	0.495814972908061	0.532494758909853	8.26828e+07	0.0962671905697446	4.67335e+07	0.125502008032129	1.70317e+07	0.47985347985348	4.74507e+07	0	2.10507e+06	0.326612903225806	2.41744e+07	0.0568181818181818	2.58545e+07	0.068901303538175	7.5048e+07	0.550387596899225	1.14873e+07	0.0403800475059382	1.64999e+07	0.255583126550869	4.81166e+07	0	0	0.0419287211740042	8.61043e+06	0.0580110497237569	7.81649e+06	0.168831168831169	0	0.0972222222222222	1.80058e+06	0.29136690647482	7.50882e+06	0.141630901287554	1.28227e+07	0.0957746478873239	2.23343e+07	0.364161849710983	2.78899e+07	0.108045977011494	4.67953e+07	0.267857142857143	1.89061e+07
2	3	109012318	110012430	23680	0.0236773244623358	0.536687631027254	4.4564e+08	0.0962671905697446	1.81289e+08	0.132530120481928	7.28997e+07	0.472527472527473	1.24205e+08	0	8.81623e+06	0.334677419354839	2.69839e+08	0.0625	5.41407e+07	0.0670391061452514	3.16065e+08	0.545219638242894	2.68979e+07	0.0403800475059382	6.58126e+07	0.255583126550869	8.89047e+07	0	5.14997e+07	0.0419287211740042	2.86627e+07	0.0580110497237569	3.23599e+07	0.168831168831169	6.92291e+07	0.0902777777777778	0	0.29136690647482	2.23438e+07	0.141630901287554	1.20656e+08	0.0985915492957746	6.90028e+07	0.364161849710983	2.19947e+08	0.108045977011494	2.33313e+08	0.267857142857143	0
10	3	111012544	112012656	620666	0.620595872666389	0.547169811320755	3.28983e+07	0.0962671905697446	2.80735e+07	0.136546184738956	1.17939e+07	0.501831501831502	2.87263e+07	0	1.68181e+06	0.346774193548387	1.20707e+07	0.0681818181818182	1.34264e+06	0.068901303538175	5.50484e+07	0.558139534883721	1.43671e+09	0.0391923990498812	1.34615e+07	0.26302729528536	3.46062e+07	0	0	0.0461215932914046	5.08027e+06	0.0580110497237569	246923	0.168831168831169	1.05651e+07	0.0902777777777778	4.31564e+06	0.29136690647482	3.42803e+06	0.137339055793991	1.21071e+07	0.104225352112676	1.90797e+07	0.375722543352601	2.57102e+07	0.108045977011494	3.71465e+07	0.25	3.90587e+07
9	3	112012657	113012769	272164	0.272133248942869	0.547169811320755	4.89901e+07	0.0923379174852652	7.23717e+07	0.139558232931727	1.87136e+07	0.512820512820513	7.29019e+07	0	3.83534e+06	0.356854838709677	3.01168e+07	0.0681818181818182	2.59082e+07	0.0707635009310987	1.29634e+08	0.578811369509044	2.74944e+07	0.0403800475059382	1.5829e+07	0.26302729528536	7.53028e+07	0	0	0.039832285115304	1.48288e+07	0.0552486187845304	2.37499e+07	0.168831168831169	6.02337e+06	0.0902777777777778	0	0.284172661870504	580146	0.15450643776824	1.51293e+07	0.104225352112676	3.62591e+07	0.369942196531792	3.09411e+07	0.110344827586207	8.08541e+07	0.267857142857143	6.88923e+07
8	3	113012770	114012882	373449	0.373406805031032	0.540880503144654	1.22449e+08	0.0962671905697446	5.91278e+07	0.134538152610442	2.80462e+07	0.509157509157509	8.64468e+07	0	503125	0.348790322580645	3.41281e+07	0.0681818181818182	2.57475e+07	0.0670391061452514	1.20248e+08	0.571059431524548	2.33628e+07	0.0415676959619952	2.31323e+07	0.265508684863524	9.55661e+07	0	6.77909e+06	0.0440251572327044	8.40547e+06	0.0580110497237569	1.94187e+07	0.168831168831169	4.38974e+06	0.0902777777777778	2.39084e+06	0.29136690647482	2.55023e+07	0.145922746781116	3.15028e+07	0.104225352112676	2.55442e+07	0.369942196531792	4.14084e+07	0.11264367816092	9.92032e+07	0.267857142857143	6.69435e+07
2	3	114012883	115012995	26924	0.0269209579317537	0.549266247379455	2.10597e+08	0.0962671905697446	1.78656e+08	0.135542168674699	6.05063e+07	0.516483516483517	1.7828e+10	0	0	0.352822580645161	1.09959e+07	0.0681818181818182	1.42852e+08	0.0707635009310987	3.94629e+08	0.555555555555556	4.82358e+07	0.0439429928741093	1.61061e+08	0.270471464019851	1.45913e+07	0	0	0.0461215932914046	4.19205e+07	0.0607734806629834	2.85704e+07	0.168831168831169	6.08878e+07	0.0833333333333333	0	0.29136690647482	7.86065e+07	0.15450643776824	8.84323e+07	0.101408450704225	6.08878e+07	0.375722543352601	1.97562e+08	0.110344827586207	7.24209e+08	0.267857142857143	1.16067e+07
2	3	115012996	116013108	581139	0.581073338712725	0.555555555555556	1.24178e+07	0.102161100196464	7.90144e+06	0.129518072289157	2.14558e+06	0.52014652014652	6.93854e+06	0	718480	0.346774193548387	2.7844e+06	0.0738636363636364	3.3305e+06	0.0707635009310987	8.2453e+06	0.521963824289406	5.21442e+06	0.0403800475059382	903285	0.26302729528536	3.63541e+06	0	0	0.0440251572327044	783945	0.0607734806629834	649343	0.155844155844156	0	0.0833333333333333	1.5228e+06	0.287769784172662	0	0.158798283261803	1.0182e+06	0.101408450704225	564183	0.38728323699422	1.85028e+06	0.108045977011494	4.32593e+06	0.285714285714286	0
1	3	116013109	117013221	150769	0.150751965027952	0.566037735849057	7.09376e+06	0.0982318271119843	5.07602e+06	0.129518072289157	829083	0.531135531135531	0	0	0	0.358870967741935	4.36359e+06	0.0738636363636364	0	0.0726256983240224	2.77517e+06	0.532299741602067	0	0.0403800475059382	869287	0.26302729528536	2.29504e+06	0	0	0.0440251572327044	0	0.0580110497237569	0	0.168831168831169	0	0.0833333333333333	0	0.29136690647482	0	0.137339055793991	0	0.101408450704225	2.17464e+06	0.375722543352601	0	0.117241379310345	0	0.285714285714286	0
3	3	118013335	119013447	237450	0.237423171181656	0.576519916142558	4.60264e+07	0.0962671905697446	3.85778e+07	0.129518072289157	952330	0.538461538461538	3.13246e+07	0	879209	0.358870967741935	2.07119e+07	0.0738636363636364	5.43408e+06	0.0763500931098696	5.08879e+06	0.568475452196382	8.47935e+06	0.0403800475059382	9.89627e+06	0.28287841191067	2.11325e+07	0	0	0.0545073375262055	2.88453e+06	0.0607734806629834	6.23913e+06	0.142857142857143	0	0.0833333333333333	0	0.294964028776978	2.24011e+06	0.137339055793991	7.43191e+06	0.101408450704225	1.92051e+07	0.393063583815029	3.23955e+07	0.117241379310345	447021	0.303571428571429	5.26427e+07
12	3	119013448	120013560	665395	0.665319818860469	0.578616352201258	5.1738e+07	0.0982318271119843	3.09751e+07	0.126506024096386	1.09643e+06	0.553113553113553	3.8535e+07	0	3.45126e+06	0.360887096774194	1.33478e+07	0.0738636363636364	1.93918e+07	0.074487895716946	6.06146e+07	0.568475452196382	1.99055e+07	0.0391923990498812	8.6214e+06	0.287841191066998	3.86607e+07	0	0	0.0566037735849057	4.08943e+06	0.0607734806629834	7.79264e+06	0.142857142857143	4.84796e+06	0.0833333333333333	1.32997e+06	0.294964028776978	7.99397e+06	0.141630901287554	1.07348e+07	0.0985915492957746	1.4686e+07	0.393063583815029	3.10375e+07	0.117241379310345	5.31655e+07	0.303571428571429	3.87837e+07
7	3	120013561	121013673	600334	0.600266169922799	0.574423480083857	2.53482e+07	0.0962671905697446	1.69973e+07	0.132530120481928	2.73072e+06	0.553113553113553	1.99319e+07	0	695507	0.36491935483871	937668	0.0795454545454545	1.40614e+07	0.0763500931098696	3.04751e+07	0.58656330749354	8.09734e+06	0.0391923990498812	6.30632e+06	0.285359801488834	1.80405e+07	0.00628930817610063	0	0.0607966457023061	3.02175e+06	0.0607734806629834	3.6476e+06	0.142857142857143	5.46144e+06	0.0833333333333333	1.47411e+06	0.29136690647482	4.40672e+06	0.141630901287554	7.88516e+06	0.0985915492957746	7.59621e+06	0.38728323699422	1.06324e+07	0.114942528735632	1.85598e+07	0.321428571428571	1.11049e+07
12	3	121013674	122013786	638068	0.63799590646257	0.578616352201258	6.89922e+07	0.0962671905697446	5.7824e+07	0.130522088353414	1.65594e+06	0.556776556776557	5.13403e+07	0	3.59907e+06	0.370967741935484	3.24978e+07	0.0795454545454545	2.64597e+07	0.0763500931098696	1.08501e+07	0.58656330749354	1.19719e+07	0.0391923990498812	1.35389e+07	0.287841191066998	5.54472e+07	0.00628930817610063	2.03537e+06	0.0649895178197065	8.22975e+06	0.0635359116022099	1.55001e+07	0.142857142857143	1.30603e+07	0.0833333333333333	2.77386e+06	0.294964028776978	1.33381e+07	0.128755364806867	1.29066e+07	0.0957746478873239	2.64597e+07	0.369942196531792	2.90826e+07	0.117241379310345	7.33412e+07	0.303571428571429	5.56114e+07
13	3	122013787	123013899	491302	0.491246489146726	0.580712788259958	5.11633e+06	0.0943025540275049	4.39111e+07	0.132530120481928	2.08167e+07	0.564102564102564	7.67742e+07	0	169971	0.372983870967742	2.52718e+07	0.0738636363636364	3.52282e+07	0.0782122905027933	1.08131e+08	0.576227390180879	2.66709e+07	0.0403800475059382	1.0137e+07	0.290322580645161	5.84717e+07	0	2.64339e+06	0.0691823899371069	1.07372e+07	0.0635359116022099	8.94685e+06	0.142857142857143	667347	0.0833333333333333	7.20498e+06	0.294964028776978	1.94879e+07	0.141630901287554	1.20438e+07	0.0985915492957746	1.5249e+07	0.375722543352601	2.9683e+06	0.117241379310345	6.80359e+07	0.303571428571429	5.90925e+07
5	3	123013900	124014012	591424	0.59135717663904	0.584905660377358	3.09986e+07	0.0982318271119843	2.49538e+07	0.127510040160643	1.12439e+07	0.575091575091575	1.96258e+07	0	176496	0.381048387096774	1.42807e+07	0.0738636363636364	2.72715e+07	0.0782122905027933	4.9316e+07	0.576227390180879	8.27681e+06	0.0403800475059382	4.86889e+06	0.290322580645161	2.62476e+07	0	0	0.0712788259958071	3.53074e+06	0.0635359116022099	8.05159e+06	0.142857142857143	2.77186e+06	0.0972222222222222	1.52327e+06	0.29136690647482	8.94621e+06	0.137339055793991	3.95517e+06	0.0985915492957746	8.81217e+06	0.38728323699422	2.69814e+07	0.114942528735632	3.88751e+06	0.303571428571429	1.58516e+07
6	3	124014013	125014125	635928	0.635856148255247	0.589098532494759	4.21677e+07	0.0982318271119843	3.44988e+07	0.126506024096386	1.12322e+07	0.575091575091575	5.56639e+07	0	2.29802e+06	0.379032258064516	1.65246e+07	0.0738636363636364	1.82613e+07	0.0782122905027933	5.35111e+07	0.591731266149871	8.98574e+06	0.0427553444180523	8.4499e+06	0.290322580645161	3.94556e+07	0	201603	0.0775681341719078	5.48548e+06	0.0635359116022099	8.0347e+06	0.142857142857143	5.15575e+06	0.0972222222222222	2.83334e+06	0.29136690647482	6.65611e+06	0.137339055793991	1.54524e+07	0.0985915492957746	1.22932e+07	0.398843930635838	3.76034e+07	0.114942528735632	4.66089e+07	0.339285714285714	2.02904e+07
7	3	125014126	126014238	289629	0.289596275620855	0.584905660377358	2.89332e+07	0.104125736738703	3.08276e+07	0.1285140562249	1.51624e+06	0.578754578754579	5.54897e+07	0	2.16244e+06	0.383064516129032	2.57489e+07	0.0738636363636364	2.89581e+07	0.0800744878957169	5.99526e+07	0.583979328165375	1.46923e+07	0.0403800475059382	7.22132e+06	0.292803970223325	3.02426e+07	0	0	0.0817610062893082	7.99234e+06	0.0662983425414365	7.53315e+06	0.142857142857143	0	0.111111111111111	0	0.29136690647482	9.13411e+06	0.137339055793991	1.78588e+07	0.107042253521127	1.02218e+07	0.398843930635838	3.45269e+07	0.117241379310345	4.32789e+07	0.321428571428571	0
7	3	126014239	127014351	405144	0.405098223900699	0.582809224318658	5.07364e+07	0.102161100196464	3.94671e+06	0.130522088353414	1.34178e+07	0.58974358974359	9.33936e+07	0	2.57647e+06	0.391129032258065	2.89382e+07	0.0738636363636364	3.18485e+07	0.0819366852886406	8.90022e+07	0.58656330749354	1.73821e+07	0.0391923990498812	1.06474e+07	0.295285359801489	4.14379e+07	0	0	0.0859538784067086	1.09572e+07	0.069060773480663	1.08495e+06	0.142857142857143	4.04632e+06	0.0972222222222222	2.2038e+06	0.29136690647482	1.43655e+07	0.137339055793991	2.00905e+07	0.104225352112676	1.78624e+07	0.393063583815029	3.79732e+07	0.11264367816092	8.82009e+06	0.339285714285714	2.46826e+07
9	3	127014352	128014464	473182	0.473128536475378	0.587002096436059	2.83354e+07	0.106090373280943	1.82835e+06	0.131526104417671	8.02539e+06	0.58974358974359	3.07397e+07	0	132360	0.391129032258065	1.81559e+07	0.0795454545454545	1.23508e+07	0.0837988826815642	4.795e+07	0.59689922480620194	1.22513e+07	0.0391923990498812	6.88837e+06	0.300248138957816	2.8538e+07	0	2.70943e+06	0.090146750524109	9.33807e+06	0.069060773480663	4.59424e+06	0.142857142857143	3.46451e+06	0.0972222222222222	1.87022e+06	0.294964028776978	6.74474e+06	0.137339055793991	1.47443e+07	0.104225352112676	1.86472e+07	0.410404624277457	1.20077e+07	0.114942528735632	4.93115e+07	0.339285714285714	272691
11	3	128014465	129014577	291553	0.29152005823342	0.584905660377358	6.32329e+06	0.108055009823183	5.13616e+07	0.133534136546185	2.0303e+07	0.578754578754579	9.18725e+07	0	3.58028e+06	0.397177419354839	3.33463e+07	0.0738636363636364	4.42569e+07	0.0837988826815642	1.13129e+08	0.59689922480620194	2.50358e+06	0.0415676959619952	1.5244e+07	0.292803970223325	6.2136e+07	0	0	0.090146750524109	1.28521e+07	0.0718232044198895	2.22882e+07	0.142857142857143	5.6228e+06	0.0972222222222222	3.06242e+06	0.29136690647482	1.99624e+07	0.128755364806867	2.95682e+07	0.109859154929577	2.48217e+07	0.427745664739884	3.54818e+07	0.119540229885057	7.81257e+07	0.357142857142857	3.31927e+06
7	3	129014578	130014690	348775	0.348735592878005	0.591194968553459	6.60417e+06	0.104125736738703	4.10626e+07	0.137550200803213	1.95489e+07	0.582417582417582	9.81556e+07	0	5.38718e+06	0.391129032258065	394114	0.0738636363636364	240473	0.0837988826815642	1.12037e+08	0.609819121447028	1.07789e+06	0.0403800475059382	1.42051e+07	0.290322580645161	6.54465e+07	0	0	0.0817610062893082	1.26689e+07	0.074585635359116	1.13859e+07	0.12987012987013	1.38734e+07	0.0972222222222222	2.55998e+06	0.29136690647482	1.21362e+07	0.137339055793991	1.82306e+07	0.104225352112676	2.16213e+07	0.421965317919075	5.21305e+07	0.119540229885057	8.61764e+07	0.321428571428571	3.47537e+07
5	3	130014691	131014803	579917	0.579851476783124	0.605870020964361	5.98463e+06	0.110019646365422	3.94897e+07	0.142570281124498	1.83352e+06	0.58974358974359	6.36935e+07	0	2.51998e+06	0.413306451612903	2.32364e+06	0.0738636363636364	2.33626e+07	0.0837988826815642	8.87551e+06	0.622739018087855	1.72438e+06	0.0403800475059382	8.06206e+06	0.297766749379653	4.29517e+07	0	0	0.079664570230608	4.78996e+06	0.074585635359116	1.49405e+07	0.155844155844156	8.62192e+06	0.0972222222222222	1.53963e+06	0.298561151079137	9.22131e+06	0.128755364806867	8.86826e+06	0.107042253521127	2.2122e+07	0.433526011560694	5.35154e+07	0.12183908045977	5.57183e+07	0.339285714285714	2.69435e+07
4	3	131014804	132014916	465701	0.465648381732864	0.607966457023061	1.01049e+07	0.111984282907662	1.36945e+07	0.142570281124498	2.70441e+06	0.58974358974359	9.76046e+06	0	448288	0.425403225806452	7.78007e+06	0.0738636363636364	8.31213e+06	0.0856610800744879	2.03428e+07	0.622739018087855	3.32915e+06	0.0403800475059382	2.50333e+06	0.30272952853598	1.18854e+07	0	0	0.079664570230608	1.49118e+06	0.074585635359116	2.31723e+06	0.142857142857143	0	0.0972222222222222	191723	0.29136690647482	5.71091e+06	0.124463519313305	613514	0.104225352112676	4.94444e+06	0.439306358381503	740448	0.12183908045977	1.49533e+07	0.339285714285714	0
5	3	132014917	133015029	327823	0.327785960186499	0.618448637316562	4.77778e+07	0.113948919449902	3.09688e+07	0.145582329317269	1.89204e+07	0.600732600732601	4.02887e+07	0	382099	0.425403225806452	1.8721e+07	0.0738636363636364	2.55842e+07	0.0837988826815642	9.35635e+07	0.635658914728682	1.21049e+07	0.0403800475059382	1.30563e+07	0.307692307692308	6.21383e+07	0	0	0.0817610062893082	6.3698e+06	0.074585635359116	1.53068e+07	0.142857142857143	1.00014e+07	0.0972222222222222	1.08944e+07	0.29136690647482	1.29805e+07	0.124463519313305	7.05301e+06	0.107042253521127	2.50857e+07	0.427745664739884	3.11975e+07	0.124137931034483	6.22014e+07	0.339285714285714	5.71955e+07
8	3	133015030	134015142	456436	0.456384428559573	0.614255765199161	4.17312e+07	0.110019646365422	3.51211e+07	0.149598393574297	1.41796e+07	0.600732600732601	4.75381e+07	0	3.20171e+06	0.433467741935484	1.99899e+07	0.0795454545454545	2.27625e+07	0.0856610800744879	7.5182e+07	0.640826873385013	1.39104e+07	0.0415676959619952	938952	0.307692307692308	3.81377e+07	0	0	0.090146750524109	6.09992e+06	0.069060773480663	7.8246e+06	0.12987012987013	7.06738e+06	0.104166666666667	0	0.294964028776978	7.02959e+06	0.124463519313305	1.00155e+06	0.115492957746479	1.74689e+07	0.433526011560694	2.77009e+07	0.119540229885057	5.11207e+07	0.357142857142857	4.94717e+07
5	3	134015143	135015255	595130	0.595062757908356	0.618448637316562	3.56428e+07	0.113948919449902	2.18611e+07	0.156626506024096	6.1996e+06	0.608058608058608	1.93881e+06	0	1.75397e+06	0.443548387096774	1.1202e+06	0.0738636363636364	8.61695e+06	0.0856610800744879	3.18374e+07	0.643410852713178	1.6261e+07	0.0427553444180523	4.14621e+06	0.305210918114144	1.86012e+07	0	0	0.0880503144654088	3.8896e+06	0.0801104972375691	2.39189e+06	0.12987012987013	2.80051e+06	0.104166666666667	0	0.29136690647482	4.4689e+06	0.128755364806867	2.89708e+06	0.112676056338028	8.34589e+06	0.433526011560694	4.10307e+07	0.124137931034483	3.97844e+07	0.357142857142857	1.6261e+07
3	3	135015256	136015368	233787	0.233760585053889	0.626834381551363	1.04327e+07	0.110019646365422	1.5084e+07	0.154618473895582	7.59944e+06	0.619047619047619	3.35482e+07	0	0	0.459677419354839	1.13416e+07	0.0738636363636364	1.37096e+07	0.0856610800744879	4.2413e+07	0.645994832041344	1.02658e+07	0.0439429928741093	8.8881e+06	0.310173697270471	3.16844e+07	0	0	0.090146750524109	1.98949e+06	0.0828729281767956	6.11057e+06	0.142857142857143	712900	0.111111111111111	3.85351e+06	0.29136690647482	4.57476e+06	0.141630901287554	1.48349e+07	0.112676056338028	9.9145e+06	0.433526011560694	4.32546e+07	0.12183908045977	4.50252e+07	0.339285714285714	1.33669e+07
5	3	136015369	137015481	399945	0.399899811321321	0.622641509433962	8.98327e+06	0.115913555992141	1.20575e+07	0.159638554216867	7.30723e+06	0.58974358974359	2.04574e+07	0	2.60996e+06	0.457661290322581	1.13652e+07	0.0738636363636364	1.44251e+07	0.0856610800744879	3.68472e+07	0.638242894056848	7.9376e+06	0.0463182897862233	8.09697e+06	0.310173697270471	3.59828e+07	0	3.20557e+06	0.0880503144654088	4.05148e+06	0.0801104972375691	7.04322e+06	0.12987012987013	0	0.111111111111111	0	0.29136690647482	3.98991e+06	0.137339055793991	5.78114e+06	0.115492957746479	9.10721e+06	0.439306358381503	1.43698e+07	0.128735632183908	3.07305e+07	0.357142857142857	4.03281e+07
7	3	137015482	138015594	173631	0.173611381913844	0.660377358490566	4.99143e+07	0.119842829076621	4.67764e+07	0.170682730923695	184831	0.622710622710623	1.19749e+08	0	2.40473e+06	0.473790322580645	3.12522e+06	0.0795454545454545	2.97256e+06	0.0875232774674116	9.94244e+06	0.671834625322997	1.48948e+07	0.0451306413301663	1.64339e+07	0.317617866004963	5.35255e+07	0	0	0.0922431865828092	8.07384e+06	0.0801104972375691	1.01397e+07	0.142857142857143	0	0.111111111111111	5.18859e+06	0.29136690647482	1.81874e+07	0.133047210300429	9.9873e+06	0.112676056338028	1.7107e+07	0.456647398843931	4.85727e+07	0.142528735632184	7.85365e+07	0.375	5.39938e+07
10	3	138015595	139015707	296624	0.296590485275164	0.670859538784067	5.69472e+07	0.12573673870334	5.31855e+07	0.168674698795181	1.67918e+07	0.63003663003663	4.42692e+07	0	140763	0.463709677419355	2.06668e+07	0.0795454545454545	3.04502e+06	0.0875232774674116	1.00074e+08	0.679586563307494	1.16251e+07	0.0451306413301663	1.96512e+07	0.317617866004963	4.76239e+07	0	0	0.0943396226415094	7.13916e+06	0.0828729281767956	9.36464e+06	0.116883116883117	5.43753e+06	0.111111111111111	9.11154e+06	0.294964028776978	1.61391e+07	0.141630901287554	2.95726e+07	0.115492957746479	2.56752e+07	0.439306358381503	4.7041e+07	0.137931034482759	6.74254e+07	0.375	3.26252e+07
6	3	139015708	140015820	469761	0.4697079230047	0.672955974842767	1.02063e+07	0.117878192534381	1.07784e+06	0.171686746987952	4.91248e+06	0.633699633699634	6.45073e+06	0	888828	0.471774193548387	6.54998e+06	0.0738636363636364	409373	0.0912476722532588	1.57186e+07	0.656330749354005	5.32186e+06	0.0439429928741093	4.13616e+06	0.32258064516129	2.56089e+07	0	0	0.090146750524109	1.98023e+06	0.0828729281767956	4.37413e+06	0.116883116883117	3.48974e+06	0.111111111111111	1.90066e+06	0.294964028776978	3.39693e+06	0.150214592274678	5.06843e+06	0.11830985915493	495056	0.450867052023121	495056	0.137931034482759	1.98442e+07	0.392857142857143	7.09581e+06
4	3	140015821	141015933	407583	0.407536948324839	0.687631027253669	3.97396e+07	0.121807465618861	3.69275e+07	0.173694779116466	1.03935e+07	0.626373626373626	3.18953e+07	0	512210	0.475806451612903	1.82095e+07	0.0738636363636364	2.04457e+07	0.0893854748603352	4.39971e+07	0.666666666666667	209700	0.0463182897862233	8.61433e+06	0.317617866004963	2.82744e+07	0	0	0.0880503144654088	5.14718e+06	0.0883977900552486	590186	0.116883116883117	402211	0.111111111111111	0	0.294964028776978	7.83028e+06	0.150214592274678	132224	0.115492957746479	1.55388e+07	0.46242774566474	2.95601e+07	0.140229885057471	3.68371e+07	0.392857142857143	1.63566e+07
7	3	141015934	142016046	336185	0.336147015387261	0.689727463312369	4.77665e+07	0.121807465618861	2.28227e+07	0.169678714859438	9.53382e+06	0.637362637362637	6.1331e+07	0	1.86298e+06	0.475806451612903	1.97529e+07	0.0738636363636364	2.09744e+06	0.0893854748603352	5.03096e+07	0.648578811369509	1.4393e+07	0.0463182897862233	1.1991e+07	0.317617866004963	5.0866e+07	0	0	0.0817610062893082	4.10283e+06	0.0856353591160221	8.14946e+06	0.116883116883117	0	0.111111111111111	2.65585e+06	0.294964028776978	3.16442e+06	0.145922746781116	1.0437e+07	0.123943661971831	2.11032e+07	0.468208092485549	2.15028e+07	0.142528735632184	5.2937e+07	0.410714285714286	4.10283e+07
9	3	142016047	143016159	553884	0.553821418179746	0.69811320754717	4.58095e+07	0.119842829076621	3.92485e+07	0.178714859437751	1.7006e+07	0.637362637362637	5.64198e+07	0	3.76917e+06	0.485887096774194	2.30175e+07	0.0738636363636364	3.12479e+07	0.0875232774674116	8.26538e+07	0.679586563307494	1.24513e+07	0.0451306413301663	112400	0.332506203473945	4.92391e+07	0	4.68943e+06	0.0880503144654088	8.81723e+06	0.0856353591160221	9.89278e+06	0.116883116883117	1.20362e+07	0.118055555555556	8.13258e+06	0.29136690647482	1.24183e+07	0.137339055793991	1.28196e+07	0.126760563380282	2.26444e+07	0.473988439306358	3.43892e+07	0.142528735632184	6.44432e+07	0.428571428571429	4.35794e+07
1	3	143016160	144016272	551004	0.550941743582975	0.708595387840671	5.71612e+06	0.113948919449902	78306.5	0.171686746987952	2.55615e+06	0.644688644688645	9.65356e+06	0	378887	0.491935483870968	4.39081e+06	0.0795454545454545	468353	0.0893854748603352	1.45803e+07	0.677002583979328	312908	0.0439429928741093	1.17696e+06	0.325062034739454	4.07836e+06	0	2.35697e+06	0.0880503144654088	420109	0.0856353591160221	1.23882e+06	0.116883116883117	0	0.118055555555556	0	0.29136690647482	0	0.141630901287554	3.27988e+06	0.126760563380282	6.13131e+06	0.468208092485549	6.55977e+06	0.144827586206897	7.17745e+06	0.410714285714286	6.25817e+06
2	3	145016386	146016498	117934	0.117920674963729	0.727463312368973	7.0661e+06	0.115913555992141	2.79774e+06	0.177710843373494	1.0857e+07	0.648351648351648	7.29404e+07	0	177021	0.508064516129032	2.10231e+07	0.0738636363636364	2.17418e+07	0.0893854748603352	5.92834e+07	0.68733850129199	7.438e+06	0.0439429928741093	9.87243e+06	0.325062034739454	2.54062e+07	0	0	0.0838574423480084	0	0.0856353591160221	1.14974e+07	0.116883116883117	0	0.138888888888889	0	0.294964028776978	2.24321e+07	0.133047210300429	1.5052e+07	0.126760563380282	1.14585e+07	0.485549132947977	1.05991e+07	0.137931034482759	4.75032e+07	0.410714285714286	0
3	3	146016499	147016611	59729	0.0597222513855934	0.721174004192872	1.24529e+08	0.117878192534381	6.37397e+07	0.179718875502008	6.43934e+06	0.648351648351648	1.78109e+07	0	0	0.520161290322581	2.11928e+07	0.0738636363636364	2.14645e+07	0.0893854748603352	9.57716e+07	0.679586563307494	1.43096e+07	0.0451306413301663	1.52005e+07	0.327543424317618	6.9235e+06	0	0	0.0859538784067086	1.55381e+07	0.0856353591160221	5.69466e+06	0.116883116883117	0	0.138888888888889	0	0.29136690647482	8.85835e+06	0.128755364806867	0	0.132394366197183	1.7084e+06	0.491329479768786	8.58579e+07	0.142528735632184	5.65936e+07	0.410714285714286	0
2	3	147016612	148016724	17378	0.0173760365078746	0.725366876310273	9.51141e+08	0.1237721021611	1.05424e+09	0.182730923694779	5.90953e+07	0.659340659340659	6.95587e+08	0	2.40267e+07	0.518145161290323	3.62672e+08	0.0909090909090909	4.88936e+08	0.0893854748603352	6.58343e+08	0.68733850129199	5.09239e+07	0.0439429928741093	5.97085e+07	0.342431761786601	3.31985e+08	0	0	0.0880503144654088	9.41141e+09	0.0856353591160221	9.7864e+07	0.12987012987013	0	0.138888888888889	0	0.29136690647482	6.08931e+07	0.141630901287554	6.93301e+07	0.132394366197183	1.76756e+08	0.502890173410405	9.71522e+08	0.144827586206897	8.26689e+08	0.410714285714286	1.98428e+08
7	3	148016725	149016837	244647	0.244619358012545	0.744234800838574	8.60531e+07	0.1237721021611	6.84712e+07	0.186746987951807	2.21517e+07	0.659340659340659	8.53439e+07	0	256003	0.534274193548387	1.76949e+07	0.0909090909090909	2.13727e+06	0.0912476722532588	1.11714e+08	0.705426356589147	2.62501e+07	0.0451306413301663	1.22095e+07	0.344913151364764	8.23842e+07	0	5.30847e+06	0.0880503144654088	1.24444e+07	0.0883977900552486	4.18518e+06	0.142857142857143	1.34017e+07	0.145833333333333	3.78474e+06	0.29136690647482	8.65084e+06	0.137339055793991	2.46236e+07	0.129577464788732	2.6416e+07	0.531791907514451	3.86657e+07	0.149425287356322	6.1025e+07	0.410714285714286	5.63796e+07
7	3	149016838	150016950	314275	0.314239490937524	0.756813417190776	6.00364e+06	0.12770137524558	1.29544e+07	0.189759036144578	7.83117e+06	0.666666666666667	1.41419e+07	0	132857	0.540322580645161	1.12138e+07	0.0909090909090909	1.24781e+07	0.0893854748603352	4.31448e+07	0.72609819121447	3.11954e+06	0.0451306413301663	1.23971e+06	0.349875930521092	2.3524e+07	0	4.13237e+06	0.0922431865828092	3.73466e+06	0.0883977900552486	2.16458e+06	0.142857142857143	5.13214e+06	0.145833333333333	2.94623e+06	0.29136690647482	1.17849e+06	0.133047210300429	2.09588e+07	0.146478873239437	4.41934e+06	0.531791907514451	1.3258e+06	0.154022988505747	2.34363e+07	0.410714285714286	2.19443e+07
9	3	150016951	151017063	372991	0.372948856779184	0.758909853249476	4.76071e+07	0.12573673870334	3.88852e+07	0.188755020080321	1.10844e+07	0.663003663003663	6.48161e+07	0	223886	0.540322580645161	2.49122e+07	0.0909090909090909	2.80369e+06	0.0893854748603352	8.93677e+07	0.718346253229974	7.88538e+06	0.0439429928741093	9.73655e+06	0.344913151364764	4.76167e+07	0	3.48186e+06	0.0859538784067086	4.97639e+06	0.0883977900552486	1.64145e+07	0.12987012987013	4.2556e+06	0.145833333333333	0	0.29136690647482	141853	0.124463519313305	1.45357e+07	0.138028169014085	1.66409e+07	0.531791907514451	4.70992e+06	0.151724137931034	5.68015e+07	0.392857142857143	9.24493e+06
1	3	151017064	152017176	133528	0.133512913040826	0.758909853249476	1.05977e+08	0.129666011787819	1.44827e+08	0.188755020080321	4.63839e+07	0.666666666666667	2.10367e+08	0	7.8174e+06	0.548387096774194	6.74691e+07	0.0852272727272727	9.30015e+07	0.0893854748603352	2.91329e+08	0.718346253229974	8.72513e+07	0.0439429928741093	4.66245e+07	0.344913151364764	1.61926e+08	0	0	0.0922431865828092	2.09484e+07	0.0911602209944751	2.80203e+07	0.12987012987013	1.20791e+07	0.145833333333333	1.38686e+07	0.294964028776978	3.58519e+07	0.128755364806867	3.56622e+07	0.138028169014085	4.64839e+07	0.520231213872832	1.01204e+08	0.154022988505747	2.58829e+08	0.392857142857143	1.29122e+08
3	3	152017177	153017289	160808	0.160789830749125	0.765199161425577	3.58765e+07	0.133595284872299	2.07819e+07	0.187751004016064	6.4192e+06	0.666666666666667	9.08334e+07	0	0	0.55241935483871	1.12047e+07	0.0909090909090909	2.03222e+07	0.0893854748603352	1.02548e+08	0.713178294573643	0	0.0439429928741093	7.23093e+06	0.344913151364764	3.3614e+07	0	0	0.090146750524109	1.44956e+06	0.0911602209944751	4.216e+06	0.12987012987013	0	0.152777777777778	0	0.294964028776978	1.98466e+07	0.11587982832618	7.35929e+06	0.138028169014085	4.71756e+07	0.526011560693642	7.66676e+07	0.15632183908046	3.54336e+07	0.392857142857143	2.07287e+07
2	3	153017290	154017402	156925	0.156907269478549	0.769392033542977	3.03451e+06	0.135559921414538	1.31391e+07	0.18574297188755	8.19084e+06	0.663003663003663	4.24831e+07	0	5.32148e+06	0.554435483870968	1.73008e+07	0.0909090909090909	1.66601e+07	0.0893854748603352	8.60418e+07	0.720930232558139	1.87426e+07	0.0439429928741093	3.3018e+06	0.342431761786601	3.66234e+06	0	0	0.0838574423480084	8.95429e+06	0.0911602209944751	6.48048e+06	0.116883116883117	0	0.159722222222222	0	0.29136690647482	6.74336e+06	0.120171673819742	148197	0.138028169014085	1.323e+07	0.526011560693642	3.44458e+07	0.158620689655172	6.37247e+06	0.410714285714286	2.1974e+07
3	3	154017403	155017515	213011	0.21298693247663	0.758909853249476	4.34685e+06	0.145383104125737	4.8775e+07	0.189759036144578	1.14502e+07	0.673992673992674	3.20086e+07	0	1.96016e+06	0.570564516129032	2.63248e+07	0.0909090909090909	2.45469e+07	0.0893854748603352	7.72528e+06	0.72609819121447	2.3473e+07	0.0451306413301663	7.89518e+06	0.342431761786601	5.23628e+07	0	0	0.0817610062893082	4.35693e+06	0.0911602209944751	1.91616e+06	0.12987012987013	7.57192e+06	0.159722222222222	4.38747e+06	0.29136690647482	2.48391e+06	0.120171673819742	1.10461e+07	0.135211267605634	2.59012e+07	0.531791907514451	4.50166e+07	0.167816091954023	4.32931e+07	0.428571428571429	5.02992e+06
5	3	155017516	156017628	426299	0.426250833655797	0.765199161425577	3.60888e+07	0.143418467583497	2.31531e+06	0.191767068273092	6.37273e+06	0.67032967032967	5.06473e+07	0	2.93834e+06	0.568548387096774	219231	0.0909090909090909	1.07323e+07	0.0875232774674116	4.8994e+07	0.733850129198966	1.67555e+07	0.0451306413301663	7.60626e+06	0.332506203473945	2.40821e+07	0	304646	0.0838574423480084	6.50098e+06	0.0911602209944751	1.03373e+07	0.12987012987013	3.7835e+06	0.159722222222222	0	0.29136690647482	3.72345e+06	0.120171673819742	1.3718e+06	0.140845070422535	1.13244e+07	0.526011560693642	1.28535e+07	0.172413793103448	3.67164e+07	0.410714285714286	3.23555e+07
6	3	156017629	157017741	422083	0.422035310009969	0.763102725366876	1.35383e+07	0.141453831041257	7.93805e+06	0.189759036144578	5.80088e+06	0.673992673992674	2.99554e+07	0	989229	0.566532258064516	1.10195e+07	0.0909090909090909	9.29099e+06	0.0893854748603352	3.25577e+07	0.723514211886305	7.32743e+06	0.0486935866983373	4.92302e+06	0.337468982630273	1.81548e+07	0	0	0.0859538784067086	329056	0.0939226519337017	564096	0.12987012987013	0	0.166666666666667	2.2351e+06	0.29136690647482	2.50709e+06	0.120171673819742	9.75554e+06	0.140845070422535	1.06573e+07	0.549132947976879	1.35383e+07	0.172413793103448	2.20391e+07	0.410714285714286	1.63393e+07
4	3	157017742	158017854	387402	0.387358228520177	0.767295597484277	1.70463e+07	0.137524557956778	1.98054e+07	0.192771084337349	5.02198e+06	0.677655677655678	1.2006e+07	0	0	0.5625	1.18954e+07	0.102272727272727	1.53852e+07	0.0912476722532588	2.67974e+07	0.736434108527132	8.41728e+06	0.0475059382422803	3.0171e+06	0.337468982630273	3.06591e+07	0	0	0.0859538784067086	2.98071e+06	0.0939226519337017	1.75599e+06	0.12987012987013	124902	0.166666666666667	0	0.287769784172662	2.71716e+06	0.11587982832618	6.07364e+06	0.140845070422535	8.03864e+06	0.543352601156069	1.07554e+07	0.177011494252874	2.10106e+07	0.410714285714286	2.67031e+07
8	3	158017855	159017967	614822	0.614752532963775	0.767295597484277	1.22754e+07	0.135559921414538	1.16475e+07	0.189759036144578	464108	0.681318681318681	1.32388e+07	0	0	0.568548387096774	380020	0.0965909090909091	4.28023e+06	0.0912476722532588	2.07196e+07	0.746770025839793	3.65503e+06	0.0475059382422803	2.3296e+06	0.344913151364764	2.01735e+06	0	0	0.0817610062893082	2.24343e+06	0.0939226519337017	1.65968e+06	0.116883116883117	0	0.173611111111111	0	0.29136690647482	3.4423e+06	0.11587982832618	940166	0.143661971830986	6.21228e+06	0.566473988439306	1.43514e+07	0.183908045977011	1.38323e+06	0.410714285714286	0
3	3	159017968	160018080	644867	0.644794138262376	0.765199161425577	7.31466e+06	0.139489194499018	2.39184e+06	0.192771084337349	1.21149e+06	0.681318681318681	5.40944e+06	0	647477	0.57258064516129	2.18409e+06	0.0965909090909091	1.0202e+06	0.0912476722532588	1.11941e+07	0.744186046511628	0	0.0463182897862233	1.20991e+06	0.352357320099256	5.43049e+06	0	0	0.0838574423480084	1.06945e+06	0.0939226519337017	527451	0.116883116883117	0	0.173611111111111	0	0.29136690647482	820480	0.11587982832618	1.81369e+06	0.140845070422535	2.68288e+06	0.578034682080925	2.31449e+06	0.186206896551724	5.92918e+06	0.428571428571429	5.34727e+06
8	3	160018081	161018193	525002	0.524942681476993	0.775681341719078	2.17686e+07	0.145383104125737	1.72711e+07	0.197791164658635	898705	0.692307692307692	2.98335e+07	0	1.59061e+06	0.584677419354839	9.29149e+06	0.102272727272727	7.56856e+06	0.0912476722532588	5.41905e+07	0.757105943152455	9.07026e+06	0.0498812351543943	5.45633e+06	0.347394540942928	3.4565e+07	0	2.50626e+06	0.0859538784067086	2.20458e+06	0.0939226519337017	3.88725e+06	0.116883116883117	3.17459e+06	0.173611111111111	0	0.29136690647482	4.01001e+06	0.11587982832618	6.68335e+06	0.138028169014085	7.85466e+06	0.583815028901734	1.7316e+07	0.193103448275862	3.55028e+07	0.428571428571429	4.59768e+07
2	3	161018194	162018306	7366	0.00736516773604583	0.786163522012579	5.48521e+08	0.143418467583497	2.46195e+07	0.199799196787149	1.07178e+08	0.688644688644689	3.2713e+08	0	2.83421e+07	0.584677419354839	6.59024e+07	0.0965909090909091	0	0.0931098696461825	7.20589e+08	0.764857881136951	3.23235e+08	0.0498812351543943	1.41232e+10	0.349875930521092	1.58473e+07	0	0	0.0880503144654088	0	0.0939226519337017	1.39002e+07	0.116883116883117	0	0.173611111111111	0	0.29136690647482	1.42904e+08	0.124463519313305	4.01654e+08	0.138028169014085	1.8661e+08	0.589595375722543	4.0525e+08	0.193103448275862	2.01423e+08	0.428571428571429	4.68134e+08
2	3	164018533	165018645	99585	0.0995737481664572	0.79664570230608	4.03737e+08	0.143418467583497	3.34722e+08	0.203815261044177	3.30753e+07	0.706959706959707	1.65243e+08	0	8.38553e+06	0.592741935483871	1.62439e+08	0.0909090909090909	5.25055e+07	0.0931098696461825	1.51371e+08	0.782945736434108	6.27605e+07	0.0522565320665083	3.65152e+07	0.359801488833747	1.01986e+08	0	0	0.0922431865828092	3.02881e+07	0.0966850828729282	2.05632e+07	0.12987012987013	0	0.180555555555556	9.5635e+06	0.294964028776978	1.05702e+07	0.137339055793991	3.0246e+07	0.140845070422535	6.92529e+07	0.589595375722543	1.62439e+08	0.193103448275862	1.58868e+08	0.446428571428571	2.51042e+08
1	3	165018646	166018758	57652	0.0576454860600752	0.80083857442348	1.66073e+08	0.157170923379175	1.39665e+08	0.214859437751004	1.84281e+07	0.6996336996337	6.42424e+07	0	1.08635e+07	0.594758064516129	2.58887e+07	0.0965909090909091	5.70574e+07	0.0949720670391061	9.20672e+07	0.795865633074935	2.25266e+07	0.0558194774346793	1.12926e+07	0.362282878411911	2.73157e+06	0	0	0.0943396226415094	1.61729e+07	0.0994475138121547	5.94022e+06	0.116883116883117	0	0.180555555555556	0	0.294964028776978	0	0.120171673819742	1.03247e+07	0.143661971830986	2.9906e+06	0.61271676300578	1.89716e+08	0.206896551724138	1.2126e+08	0.392857142857143	5.59531e+07
1	3	166018759	167018871	60292	0.0602851877737816	0.819706498951782	3.8572e+07	0.161100196463654	3.45541e+07	0.214859437751004	4.41116e+06	0.706959706959707	2.07324e+07	0	0	0.592741935483871	0	0.107954545454545	1.10573e+07	0.0931098696461825	8.0993e+07	0.806201550387597	0	0.0570071258907363	2.15963e+06	0.369727047146402	1.32159e+07	0	0	0.0922431865828092	0	0.0994475138121547	0	0.142857142857143	0	0.1875	0	0.29136690647482	0	0.128755364806867	1.99831e+07	0.149295774647887	575901	0.61271676300578	0	0.209195402298851	3.53968e+07	0.446428571428571	1.14386e+08
6	3	167018872	168018984	384131	0.384087598101415	0.832285115303983	3.4922e+07	0.165029469548134	5.70954e+07	0.21285140562249	1.07459e+07	0.710622710622711	3.29529e+07	0	217393	0.600806451612903	1.97218e+07	0.107954545454545	1.56197e+06	0.0931098696461825	5.36132e+07	0.832041343669251	3.71897e+06	0.0581947743467933	812467	0.369727047146402	3.2152e+07	0	0	0.10062893081761	5.46142e+06	0.0966850828729282	7.96922e+06	0.12987012987013	0	0.1875	2.47931e+06	0.294964028776978	9.59103e+06	0.133047210300429	1.41142e+07	0.149295774647887	1.0847e+07	0.624277456647399	2.09942e+07	0.209195402298851	6.23209e+07	0.517857142857143	3.00378e+07
10	3	169019098	170019210	288428	0.288395411318521	0.840670859538784	6.66744e+07	0.174852652259332	4.37946e+06	0.228915662650602	2.18728e+07	0.721611721611722	6.30376e+07	0	2.89526e+06	0.602822580645161	2.94701e+07	0.119318181818182	3.27966e+06	0.0949720670391061	1.24139e+08	0.847545219638243	1.11841e+07	0.0617577197149644	1.5821e+07	0.37468982630273	7.37971e+07	0	0	0.111111111111111	4.91783e+06	0.0994475138121547	9.4342e+06	0.142857142857143	1.11841e+07	0.1875	3.30197e+06	0.298561151079137	2.00725e+07	0.128755364806867	2.05152e+07	0.166197183098592	2.09752e+07	0.61271676300578	5.86735e+07	0.227586206896552	8.47983e+06	0.589285714285714	1.73353e+07
8	3	170019211	171019323	392021	0.391976706632151	0.838574423480084	3.92444e+07	0.168958742632613	2.74505e+07	0.227911646586345	1.09568e+07	0.725274725274725	6.04157e+06	0	2.13017e+06	0.602822580645161	2.58973e+07	0.107954545454545	1.36047e+07	0.0968342644320298	6.55323e+06	0.844961240310077	2.50907e+07	0.0653206650831354	8.65835e+06	0.372208436724566	3.8619e+07	0	0	0.0964360587002096	2.37292e+06	0.0966850828729282	112412	0.142857142857143	8.36355e+06	0.180555555555556	2.40649e+06	0.294964028776978	6.71285e+06	0.120171673819742	6.1099e+06	0.163380281690141	1.08548e+07	0.61849710982659	1.67271e+06	0.225287356321839	5.10177e+07	0.535714285714286	0
4	3	171019324	172019436	495991	0.495934959349593	0.836477987421384	5.10422e+06	0.153241650294695	7.85519e+06	0.223895582329317	2.67751e+06	0.721611721611722	1.32642e+07	0	42091.1	0.610887096774194	1.24072e+07	0.102272727272727	0	0.0968342644320298	1.5443e+07	0.847545219638243	9.60079e+06	0.0641330166270784	3.41723e+06	0.367245657568238	7.17213e+06	0	0	0.0985324947589098	1.88427e+06	0.0966850828729282	2.0297e+06	0.142857142857143	0	0.1875	0	0.305755395683453	2.14486e+06	0.124463519313305	0	0.166197183098592	4.30498e+06	0.624277456647399	6.50376e+06	0.222988505747126	1.84969e+07	0.517857142857143	8.40069e+06
6	3	172019437	173019549	487449	0.487393924486533	0.842767295597484	4.31894e+07	0.163064833005894	1.6959e+07	0.225903614457831	6.31652e+06	0.721611721611722	3.50914e+07	0	428287	0.602822580645161	1.04137e+07	0.102272727272727	9.51025e+06	0.0968342644320298	3.76984e+06	0.837209302325581	9.9266e+06	0.0665083135391924	6.41929e+06	0.382133995037221	2.05974e+07	0	5.47066e+06	0.0922431865828092	2.37993e+06	0.0966850828729282	6.23766e+06	0.142857142857143	6.72622e+06	0.1875	0	0.302158273381295	109122	0.120171673819742	2.42781e+06	0.16056338028169	1.0113e+07	0.595375722543353	1.83716e+07	0.209195402298851	3.18013e+07	0.535714285714286	9.32498e+06
1	3	173019550	174019662	676705	0.67662854097487	0.844863731656184	1.15149e+07	0.159135559921415	1.05833e+07	0.22289156626506	790240	0.703296703296703	1.82438e+07	0	308507	0.608870967741935	3.80863e+06	0.0965909090909091	4.86102e+06	0.0986964618249535	9.78851e+06	0.834625322997416	2.34563e+06	0.0665083135391924	115902	0.372208436724566	5.2987e+06	0	0	0.0859538784067086	342865	0.0994475138121547	1.5028e+06	0.12987012987013	0	0.1875	0	0.298561151079137	781878	0.120171673819742	2.59254e+06	0.149295774647887	566385	0.595375722543353	8.95605e+06	0.209195402298851	9.01066e+06	0.553571428571429	0
1	3	174019663	175019775	442579	0.442528994223653	0.832285115303983	2.72227e+06	0.143418467583497	1.77912e+06	0.217871485943775	1.798e+06	0.714285714285714	0	0	0	0.606854838709677	1.14115e+06	0.102272727272727	1.4865e+06	0.0949720670391061	6.23637e+06	0.824289405684755	0	0.0676959619952494	1.48066e+06	0.377171215880893	540116	0	0	0.0859538784067086	523029	0.0994475138121547	76333.9	0.116883116883117	0	0.194444444444444	2.19367e+06	0.302158273381295	0	0.120171673819742	0	0.143661971830986	781828	0.63005780346820806	0	0.206896551724138	6.82623e+06	0.5	0
1	3	175019776	176019888	501215	0.501158369104291	0.836477987421384	5.05102e+06	0.149312377210216	4.72536e+06	0.225903614457831	1.34444e+06	0.714285714285714	2.59111e+06	0	416524	0.612903225806452	2.06751e+06	0.0965909090909091	1.3126e+06	0.100558659217877	6.43597e+06	0.801033591731266	0	0.0688836104513064	261831	0.377171215880893	1.61551e+06	0	0	0.0922431865828092	0	0.0966850828729282	0	0.116883116883117	0	0.180555555555556	0	0.298561151079137	0	0.120171673819742	2.33351e+06	0.143661971830986	0	0.61849710982659	6.33382e+06	0.211494252873563	2.42572e+06	0.553571428571429	0
4	3	178020115	179020227	137610	0.137594451826944	0.872117400419287	9.68922e+07	0.147347740667976	6.76441e+07	0.234939759036145	3.01169e+08	0.728937728937729	3.72907e+08	0	7.5855e+06	0.622983870967742	1.28018e+08	0.0965909090909091	4.78086e+07	0.104283054003724	3.16361e+08	0.844961240310077	6.60629e+07	0.0760095011876485	8.13818e+07	0.377171215880893	1.96091e+08	0	9.68922e+06	0.0880503144654088	2.55278e+07	0.0994475138121547	1.46806e+07	0.142857142857143	0	0.1875	1.41105e+07	0.298561151079137	2.30696e+07	0.133047210300429	2.6266e+07	0.154929577464789	4.34991e+07	0.601156069364162	1.19308e+08	0.220689655172414	2.36965e+08	0.517857142857143	4.29409e+08
8	3	179020228	180020340	499909	0.499852516665617	0.828092243186583	4.18681e+07	0.147347740667976	2.98721e+07	0.219879518072289	6.65015e+06	0.714285714285714	4.35977e+07	0	835225	0.608870967741935	1.84649e+07	0.0909090909090909	2.48411e+07	0.104283054003724	5.57337e+07	0.813953488372093	5.71533e+06	0.0760095011876485	4.21129e+06	0.367245657568238	3.08357e+07	0	0	0.079664570230608	6.94571e+06	0.0966850828729282	3.37899e+06	0.142857142857143	0	0.1875	0	0.298561151079137	1.05839e+07	0.141630901287554	9.64031e+06	0.143661971830986	1.25897e+07	0.606936416184971	2.15424e+07	0.213793103448276	4.12383e+07	0.535714285714286	3.81022e+07
4	3	180020341	181020453	141311	0.141295033661196	0.851153039832285	1.14756e+08	0.145383104125737	6.26079e+07	0.214859437751004	2.15578e+07	0.714285714285714	8.84574e+07	0	2.95473e+06	0.612903225806452	3.64773e+07	0.0909090909090909	2.77513e+07	0.106145251396648	1.80744e+08	0.803617571059432	0	0.0831353919239905	1.77851e+07	0.367245657568238	5.03473e+07	0	9.43545e+06	0.079664570230608	1.81451e+07	0.0966850828729282	1.19537e+07	0.142857142857143	0	0.194444444444444	0	0.305755395683453	1.88207e+07	0.145922746781116	1.2945e+07	0.143661971830986	4.70123e+07	0.566473988439306	4.10237e+07	0.209195402298851	1.08205e+08	0.5	1.23071e+08
6	3	182020567	183020679	406969	0.406923017699	0.823899371069182	3.46897e+07	0.147347740667976	2.11371e+07	0.21285140562249	9.1007e+06	0.710622710622711	6.61551e+07	0	2.05193e+06	0.604838709677419	1.75514e+07	0.0965909090909091	1.13909e+07	0.106145251396648	5.91839e+07	0.788113695090439	1.89015e+07	0.0819477434679335	9.1007e+06	0.372208436724566	3.69064e+07	0	0	0.0754716981132075	4.56091e+06	0.0911602209944751	9.92804e+06	0.142857142857143	862172	0.1875	2.38562e+06	0.298561151079137	9.1007e+06	0.150214592274678	5.95682e+06	0.143661971830986	1.36511e+07	0.566473988439306	3.51027e+06	0.213793103448276	4.38514e+07	0.535714285714286	2.45719e+07
1	3	183020680	184020792	125085	0.12507086699203	0.832285115303983	2.99796e+08	0.145383104125737	2.41345e+08	0.207831325301205	7.05712e+06	0.706959706959707	6.7802e+07	0	3.17112e+07	0.608870967741935	2.03943e+08	0.0965909090909091	1.3149e+08	0.106145251396648	5.60479e+08	0.775193798449612	9.51734e+06	0.0855106888361045	6.14966e+07	0.372208436724566	2.56968e+08	0	0	0.0712788259958071	4.44142e+07	0.0911602209944751	4.56066e+07	0.142857142857143	2.80511e+07	0.1875	0	0.298561151079137	1.02058e+08	0.150214592274678	1.48402e+07	0.143661971830986	1.24483e+08	0.566473988439306	2.36459e+08	0.197701149425287	4.0936e+08	0.535714285714286	2.7981e+08
12	3	184020793	185020905	444182	0.444131813105119	0.828092243186583	7.41291e+07	0.145383104125737	5.01655e+07	0.214859437751004	1.85368e+07	0.714285714285714	1.24112e+08	0	3.29004e+06	0.610887096774194	4.1563e+07	0.0965909090909091	3.11039e+07	0.104283054003724	9.75898e+07	0.775193798449612	1.70987e+06	0.0760095011876485	1.01519e+06	0.364764267990074	7.71125e+07	0	3.00177e+06	0.0712788259958071	8.92135e+06	0.0911602209944751	1.20877e+06	0.142857142857143	7.7632e+06	0.194444444444444	0	0.298561151079137	2.63453e+06	0.158798283261803	1.228e+07	0.140845070422535	2.49282e+07	0.578034682080925	5.71233e+06	0.209195402298851	9.18487e+07	0.535714285714286	3.55473e+07
8	3	185020906	186021018	558360	0.558296912448893	0.821802935010482	2.1841e+07	0.139489194499018	2.28737e+06	0.206827309236948	1.50422e+07	0.710622710622711	5.66759e+07	0	747791	0.606854838709677	1.56135e+07	0.0965909090909091	1.29609e+07	0.106145251396648	4.24581e+07	0.767441860465116	1.34322e+07	0.0700712589073634	5.4559e+06	0.364764267990074	2.97313e+07	0	0	0.0733752620545073	2.52248e+06	0.0911602209944751	3.63032e+06	0.142857142857143	3.08786e+06	0.1875	3.47759e+06	0.294964028776978	8.57374e+06	0.167381974248927	1.31046e+07	0.140845070422535	1.18154e+07	0.572254335260116	3.16052e+07	0.206896551724138	3.88863e+07	0.535714285714286	2.82783e+07
15	3	186021019	187021131	238029	0.238002105762049	0.821802935010482	1.22961e+08	0.137524557956778	1.17907e+08	0.204819277108434	2.76393e+07	0.710622710622711	1.29267e+08	0	2.63121e+06	0.61491935483871	7.40102e+07	0.0965909090909091	5.25146e+07	0.106145251396648	1.96901e+08	0.751937984496124	3.90806e+07	0.0653206650831354	1.7925e+07	0.362282878411911	1.26859e+08	0	0	0.0691823899371069	1.75455e+07	0.0911602209944751	2.54616e+07	0.142857142857143	3.6217e+07	0.1875	0	0.294964028776978	2.45813e+07	0.158798283261803	3.33019e+07	0.138028169014085	4.21571e+07	0.572254335260116	4.94255e+07	0.202298850574713	1.29761e+08	0.482142857142857	9.54811e+07
4	3	187021132	188021244	19026	0.0190238503049155	0.811320754716981	4.22894e+08	0.133595284872299	2.98312e+08	0.210843373493976	6.28203e+07	0.703296703296703	6.56996e+08	0	2.19456e+07	0.608870967741935	1.89648e+08	0.102272727272727	2.07472e+08	0.106145251396648	4.08671e+08	0.746770025839793	1.2367e+08	0.0593824228028504	7.75008e+07	0.367245657568238	1.03464e+08	0	7.00795e+07	0.0733752620545073	7.38543e+07	0.0883977900552486	7.03139e+07	0.142857142857143	0	0.180555555555556	0	0.294964028776978	0	0.163090128755365	1.92291e+08	0.143661971830986	1.47536e+08	0.572254335260116	3.75426e+08	0.202298850574713	3.3651e+08	0.5	7.50852e+08
2	3	188021245	189021357	564544	0.564480213735848	0.80083857442348	1.94653e+06	0.141453831041257	5.82359e+06	0.207831325301205	2.81165e+06	0.6996336996337	4.37368e+06	0	739600	0.596774193548387	354268	0.102272727272727	4.69229e+06	0.109869646182495	4.99511e+06	0.713178294573643	0	0.0581947743467933	1.42658e+06	0.362282878411911	9.06592e+06	0	0	0.0712788259958071	831616	0.0883977900552486	1.18882e+06	0.142857142857143	0	0.1875	0	0.294964028776978	94220.3	0.167381974248927	3.30064e+06	0.129577464788732	608708	0.53757225433526	2.3937e+06	0.206896551724138	6.54034e+06	0.553571428571429	0
2	3	189021358	190021470	280238	0.280206336683955	0.809224318658281	1.65972e+07	0.135559921414538	1.45847e+07	0.213855421686747	6.6699e+06	0.706959706959707	4.01444e+07	0	0	0.608870967741935	145649	0.0965909090909091	1.17381e+07	0.109869646182495	4.02509e+07	0.723514211886305	1.25943e+07	0.0617577197149644	7.70504e+06	0.369727047146402	2.97366e+07	0	9.26856e+06	0.0712788259958071	2.52481e+06	0.0856353591160221	596722	0.142857142857143	0	0.180555555555556	0	0.294964028776978	949041	0.167381974248927	4.40543e+06	0.135211267605634	6.19513e+06	0.566473988439306	1.01954e+06	0.211494252873563	3.54623e+06	0.553571428571429	1.8781e+07
6	3	190021471	191021583	185388	0.185367053522952	0.79874213836478	2.99672e+07	0.135559921414538	2.36453e+06	0.207831325301205	1.92392e+07	0.710622710622711	6.22395e+07	0	0	0.600806451612903	3.30251e+07	0.107954545454545	1.43842e+07	0.108007448789572	6.9035e+07	0.723514211886305	6.2722e+06	0.0558194774346793	7.94311e+06	0.362282878411911	3.62449e+07	0	0	0.0691823899371069	7.57952e+06	0.0911602209944751	1.08606e+07	0.142857142857143	0	0.173611111111111	0	0.294964028776978	0	0.167381974248927	1.3237e+07	0.135211267605634	2.44332e+07	0.560693641618497	3.85292e+07	0.202298850574713	5.80902e+07	0.517857142857143	5.67799e+07
2	3	191021584	192021696	221986	0.221960918416219	0.811320754716981	5.36284e+06	0.141453831041257	1.36886e+07	0.215863453815261	6.02244e+06	0.714285714285714	3.46522e+07	0	940457	0.604838709677419	0	0.107954545454545	3.02335e+06	0.108007448789572	2.64412e+07	0.733850129198966	0	0.0558194774346793	181889	0.359801488833747	1.59618e+07	0	0	0.0691823899371069	0	0.0911602209944751	3.04378e+06	0.142857142857143	0	0.173611111111111	0	0.294964028776978	0	0.158798283261803	2.76367e+06	0.138028169014085	3.1502e+06	0.554913294797688	6.43541e+06	0.204597701149425	1.5294e+07	0.482142857142857	2.37094e+07
3	3	192021697	193021809	252750	0.252721442477	0.805031446540881	2.76033e+07	0.139489194499018	1.85801e+06	0.223895582329317	481193	0.714285714285714	3.04345e+06	0	0	0.606854838709677	2.24336e+07	0.102272727272727	2.63765e+06	0.108007448789572	3.87047e+07	0.741602067183463	1.00164e+07	0.0581947743467933	1.6127e+06	0.367245657568238	1.26607e+07	0	0	0.0628930817610063	2.76677e+06	0.0911602209944751	4.00994e+06	0.12987012987013	0	0.166666666666667	0	0.294964028776978	2.10451e+06	0.15450643776824	241249	0.132394366197183	1.09902e+07	0.549132947976879	5.57251e+06	0.193103448275862	3.00644e+07	0.482142857142857	4.16471e+07
4	3	193021810	194021922	327455	0.3274180017658	0.80293501048218	2.77623e+06	0.135559921414538	2.76102e+07	0.221887550200803	9.46613e+06	0.721611721611722	3.56944e+07	0	637548	0.600806451612903	2.33713e+06	0.102272727272727	1.62872e+07	0.108007448789572	5.61856e+07	0.741602067183463	3.81732e+06	0.0558194774346793	661186	0.372208436724566	3.83277e+07	0	3.96605e+06	0.0628930817610063	6.46699e+06	0.0911602209944751	1.24225e+07	0.12987012987013	0	0.159722222222222	2.90843e+06	0.302158273381295	4.89923e+06	0.145922746781116	7.49412e+06	0.135211267605634	2.0147e+07	0.560693641618497	2.21294e+07	0.213793103448276	3.39317e+07	0.464285714285714	7.27108e+07
9	3	194021923	195022035	360717	0.360676243584475	0.811320754716981	4.6761e+07	0.137524557956778	4.18885e+07	0.219879518072289	1.23628e+07	0.714285714285714	6.0421e+06	0	578759	0.598790322580645	3.2203e+07	0.102272727272727	1.86057e+06	0.109869646182495	7.75751e+07	0.728682170542636	102676	0.0558194774346793	9.0277e+06	0.364764267990074	4.62043e+07	0	0	0.0628930817610063	7.17525e+06	0.0911602209944751	7.54355e+06	0.12987012987013	0	0.173611111111111	0	0.294964028776978	5.89842e+06	0.145922746781116	8.452e+06	0.135211267605634	1.7387e+07	0.554913294797688	4.75244e+07	0.209195402298851	5.68226e+07	0.482142857142857	1.45908e+07
9	3	195022036	196022148	360645	0.360604251719556	0.80083857442348	4.41129e+07	0.141453831041257	4.59582e+07	0.216867469879518	2.84775e+07	0.721611721611722	2.4127e+07	0	1.73662e+06	0.600806451612903	2.8294e+07	0.107954545454545	2.24822e+07	0.108007448789572	1.26912e+08	0.744186046511628	1.73301e+07	0.0581947743467933	1.46729e+07	0.37468982630273	7.04383e+07	0	3.64843e+06	0.0628930817610063	1.31413e+07	0.0911602209944751	1.60333e+07	0.12987012987013	9.2427e+06	0.159722222222222	2.66616e+06	0.294964028776978	2.50733e+07	0.15450643776824	3.81261e+07	0.138028169014085	5.62318e+07	0.572254335260116	1.01942e+08	0.2	8.78767e+07	0.5	6.1618e+07
12	3	196022149	197022261	508570	0.508512538083197	0.807127882599581	3.46994e+07	0.135559921414538	2.91703e+07	0.215863453815261	1.855e+07	0.717948717948718	8.31895e+07	0	3.284e+06	0.602822580645161	2.4953e+07	0.0965909090909091	2.22847e+07	0.108007448789572	7.76282e+07	0.728682170542636	2.45787e+07	0.0581947743467933	9.87151e+06	0.372208436724566	5.13291e+07	0	2.58723e+06	0.0649895178197065	560465	0.0911602209944751	1.06647e+07	0.12987012987013	9.83149e+06	0.152777777777778	1.89067e+06	0.294964028776978	8.41197e+06	0.150214592274678	4.91574e+06	0.129577464788732	1.76899e+07	0.554913294797688	2.76943e+07	0.202298850574713	683667	0.482142857142857	7.86519e+07
7	3	197022262	198022374	287793	0.287760483065414	0.0167714884696017	6.0752e+07	0.00589390962671906	3.9454e+07	0.00301204819277108	2.17389e+07	0.0293040293040293	7.47393e+07	0	5.07788e+06	0.0181451612903226	3.21073e+07	0.00568181818181818	2.97833e+07	0.0037243947858473	5.84532e+07	0.0155038759689922	1.28354e+07	0.00356294536817102	1.57377e+09	0.0124069478908189	4.88905e+07	0	2.22738e+06	0	3.64992e+06	0.00828729281767956	9.67888e+06	0	0	0.00694444444444444	0	0.00359712230215827	8.81269e+08	0	1.19818e+07	0.0028169014084507	2.15943e+07	0	281191	0.00919540229885057	4.84845e+07	0	0
26	4	1000808	3002421	907282	0.453275206908025	0.0566037735849057	4.82037e+07	0.0923379174852652	5.12902e+07	0.0572289156626506	1.94882e+07	0.0256410256410256	8.08933e+07	0.00417536534446764	532323	0.032258064516129	4.06722e+07	0.0511363636363636	2.66541e+07	0.0242085661080074	1.45068e+08	0.246770025839794	1.14744e+07	0.0273159144893112	1.87733e+06	0.112903225806451	1.04646e+08	0.0188679245283019	6.09489e+06	0.0188679245283019	1.51375e+07	0.0248618784530387	1.52687e+07	0.0194805194805195	1.02712e+07	0.0208333333333333	6.00605e+06	0.0323741007194245	3.19621e+07	0.238197424892704	2.23949e+06	0.109859154929577	2.06811e+07	0.0751445086705202	6.52509e+07	0.0436781609195402	1.26891e+08	0.241071428571428	7.3414e+07
15	4	3002422	5004035	633851	0.316669947352486	0.0545073375262055	2.99027e+07	0.0874263261296661	4.22825e+06	0.051706827309237	1.48145e+07	0.0256410256410256	5.82581e+07	0.00417536534446764	3.27584e+06	0.0342741935483871	2.92716e+07	0.0511363636363636	2.00269e+07	0.0260707635009311	9.10967e+07	0.200258397932816	9.24081e+06	0.0249406175771971	1.60347e+07	0.0967741935483873	4.01044e+07	0.0188679245283019	863743	0.0167714884696017	9.39873e+06	0.0248618784530387	7.84421e+06	0.012987012987013	1.19733e+07	0.0208333333333333	1.86721e+06	0.0323741007194245	2.0174e+07	0.238197424892704	1.68709e+07	0.101408450704225	2.737e+07	0.0635838150289018	4.46895e+07	0.0425287356321839	9.70468e+07	0.232142857142857	4.20567e+07
15	4	5004036	7005649	1098136	0.548625259415652	0.0534591194968553	4.12356e+07	0.0854616895874264	3.60942e+07	0.0552208835341365	1.2774e+06	0.021978021978022	4.80224e+07	0.00417536534446764	1.50173e+06	0.0342741935483871	1.93467e+07	0.0568181818181818	2.41737e+07	0.0251396648044692	8.80841e+07	0.19250645994832	1.03684e+07	0.0237529691211401	1.24285e+06	0.0918114143920596	3.10947e+07	0.0188679245283019	442858	0.0167714884696017	7.76425e+06	0.0234806629834255	2.90632e+06	0.012987012987013	2.65745e+06	0.0173611111111111	3.15264e+06	0.0323741007194245	1.30084e+07	0.229613733905579	7.21666e+06	0.0957746478873239	2.02041e+07	0.0578034682080925	2.77832e+07	0.0413793103448276	8.1301e+07	0.214285714285714	4.11726e+07
15	4	7005650	9007263	1085815	0.542469726930367	0.0524109014675053	2.88745e+07	0.0854616895874264	2.63647e+07	0.053714859437751	7.27167e+06	0.0201465201465202	3.82365e+07	0.00417536534446764	2.5372e+06	0.0342741935483871	1.45411e+07	0.0511363636363636	2.11924e+07	0.0279329608938547	6.62748e+07	0.193798449612404	1.6481e+07	0.0225653206650831	1.02394e+07	0.0893300248138958	3.23202e+07	0.0188679245283019	2.43712e+06	0.0146750524109015	4.78099e+06	0.0220994475138122	8.49999e+06	0.012987012987013	0	0.0138888888888889	30542.3	0.0323741007194245	1.15136e+07	0.223175965665236	7.73462e+06	0.0971830985915492	1.38255e+07	0.0578034682080925	2.04675e+07	0.0402298850574712	6.16388e+07	0.1875	1.55862e+07
6	4	9007264	11008877	422921	0.211289988978894	0.050314465408805	3.07367e+07	0.081532416502947	4.69946e+07	0.0522088353413654	1.02081e+07	0.0201465201465202	2.8248e+07	0.00313152400835073	2.16599e+06	0.0342741935483871	1.11293e+07	0.0397727272727273	1.03756e+07	0.0270018621973929	1.21864e+08	0.178294573643411	9.73301e+06	0.0231591448931116	1.64602e+07	0.0905707196029777	2.43876e+07	0.0188679245283019	0	0.0146750524109015	7.74643e+06	0.0220994475138122	5.67679e+06	0.012987012987013	0	0.0138888888888889	0	0.0323741007194245	6.414e+06	0.218884120171674	1.20046e+07	0.0943661971830985	8.81237e+06	0.0664739884393064	3.18245e+07	0.0367816091954023	4.21834e+07	0.178571428571429	2.46319e+07
3	4	13010492	14011298	174274	0.174133474286251	0.0482180293501048	8.19727e+07	0.0825147347740668	8.79561e+07	0.0502008032128514	2.75948e+07	0.021978021978022	7.25903e+06	0.00208768267223382	4.80175e+06	0.0342741935483871	3.23513e+07	0.0397727272727273	3.96975e+07	0.0223463687150838	1.21328e+08	0.175710594315245	3.12987e+07	0.0225653206650831	2.14716e+07	0.0893300248138958	6.42169e+07	0.0188679245283019	7.80693e+06	0.010482180293501	1.0089e+07	0.0220994475138122	1.92436e+07	0.012987012987013	0	0.0208333333333333	0	0.0323741007194245	3.48467e+07	0.227467811158798	2.23562e+07	0.0929577464788732	1.93419e+07	0.0635838150289017	5.10052e+06	0.032183908045977	1.00104e+08	0.160714285714286	3.9573e+07
10	4	15012106	16012912	380475	0.380168204259163	0.050314465408805	1.88577e+07	0.0844793713163065	2.3661e+07	0.0502008032128514	1.56136e+06	0.021978021978022	3.98226e+07	0.00208768267223382	1.64956e+06	0.032258064516129	1.62815e+07	0.0397727272727273	1.81832e+07	0.0223463687150838	8.41315e+07	0.175710594315245	1.12872e+07	0.0225653206650831	8.45654e+06	0.0893300248138958	3.309e+06	0.0188679245283019	1.78795e+06	0.00838574423480084	231059	0.0220994475138122	6.41047e+06	0.012987012987013	0	0.0208333333333333	0	0.0323741007194245	1.06409e+07	0.227467811158798	1.34784e+07	0.0929577464788732	2.05948e+07	0.0578034682080925	2.02176e+07	0.0344827586206897	5.94011e+07	0.142857142857143	1.69567e+07
11	4	16012913	18014526	948568	0.473901561439918	0.0482180293501048	2.54913e+07	0.0854616895874264	1.70238e+07	0.0471887550200804	6.52501e+06	0.0201465201465202	2.33054e+07	0.00208768267223382	0	0.032258064516129	6.94115e+06	0.0426136363636364	8.50378e+06	0.0223463687150838	3.72895e+07	0.161498708010336	2.07632e+06	0.0231591448931116	5.36392e+06	0.0880893300248139	1.60732e+07	0.0188679245283019	0	0.00733752620545074	1.40848e+06	0.0220994475138122	4.40639e+06	0.012987012987013	0	0.0208333333333333	0	0.0305755395683453	2.76835e+06	0.225321888412017	9.47573e+06	0.0985915492957746	8.68228e+06	0.0549132947976878	2.27521e+07	0.0344827586206897	2.01403e+07	0.178571428571429	1.15248e+07
3	4	20016141	21016947	673298	0.672755086645077	0.0419287211740042	2.26447e+07	0.0903732809430255	1.81568e+07	0.0431726907630522	4.80453e+06	0.0146520146520147	1.16313e+07	0.00208768267223382	1.55358e+06	0.0282258064516129	1.5498e+06	0.0397727272727273	7.42613e+06	0.0204841713221601	2.83778e+07	0.155038759689922	54337.6	0.0201900237529691	5.53619e+06	0.0893300248138958	9.65129e+06	0.0188679245283019	0	0.00628930817610063	2.64628e+06	0.0220994475138122	4.07532e+06	0.012987012987013	0	0.0208333333333333	2.00706e+06	0.0287769784172662	3.00653e+06	0.227467811158798	3.88294e+06	0.0873239436619718	5.54189e+06	0.0404624277456647	1.61438e+07	0.0298850574712644	2.88794e+07	0.160714285714286	2.04859e+06
2	4	21016948	23018561	414489	0.207077388547442	0.0450733752620545	2.98715e+07	0.081532416502947	4.28331e+07	0.0436746987951808	1.0482e+07	0.0146520146520147	2.71886e+07	0.00208768267223382	1.66157e+06	0.0282258064516129	1.94185e+07	0.0397727272727273	2.57417e+07	0.0176908752327746	4.5361e+06	0.15374677002584	1.05007e+06	0.0219714964370546	7.86962e+06	0.0856079404466501	2.19803e+07	0.0188679245283019	0	0.00524109014675053	7.10721e+06	0.0220994475138122	4.84287e+06	0.012987012987013	1.44406e+07	0.0208333333333333	0	0.0287769784172662	4.82326e+06	0.236051502145923	1.86564e+07	0.0929577464788732	5.94929e+06	0.0520231213872833	6.22693e+06	0.028735632183908	3.34716e+07	0.178571428571429	1.4708e+07
5	4	23018562	25020175	253099	0.12644745690228	0.0450733752620545	3.94318e+07	0.0834970530451866	4.40886e+07	0.0416666666666667	1.61205e+07	0.0146520146520147	3.54003e+07	0.00208768267223382	3.99159e+06	0.0322580645161291	1.62455e+07	0.0397727272727273	1.77118e+07	0.0204841713221601	8.22991e+07	0.145994832041344	5.14499e+06	0.0225653206650831	1.6141e+07	0.0880893300248139	5.05831e+06	0.0188679245283019	3.61324e+06	0.00628930817610063	752772	0.0220994475138122	1.29163e+07	0.012987012987013	0	0.0208333333333333	0	0.0287769784172662	1.15449e+07	0.236051502145923	5.61031e+06	0.0887323943661971	1.85896e+07	0.0520231213872832	4.25422e+07	0.028735632183908	5.70237e+07	0.169642857142857	3.93442e+07
11	4	25020176	27021789	767040	0.383210748925617	0.0429769392033543	2.13023e+06	0.0893909626719057	196363	0.0386546184738955	1.07388e+07	0.0183150183150183	1.97754e+07	0.00208768267223382	3.1005e+06	0.0413306451612903	1.2527e+07	0.0397727272727273	2.11742e+07	0.0232774674115456	5.27035e+07	0.143410852713178	1.54108e+07	0.0207838479809976	1.16988e+07	0.0831265508684864	2.27852e+07	0.0188679245283019	0	0.00524109014675053	545990	0.0220994475138122	7.05486e+06	0.012987012987013	4.79798e+06	0.0173611111111111	0	0.0287769784172662	836281	0.244635193133047	5.31757e+06	0.0859154929577464	1.25487e+07	0.0491329479768786	1.16877e+07	0.028735632183908	3.98439e+07	0.160714285714286	3.11108e+07
7	4	36029053	38030666	440764	0.220204295133827	0.0461215932914046	249658	0.0972495088408644	2.43042e+07	0.0381526104417671	1.33122e+07	0.0146520146520147	2.94585e+07	0.00208768267223382	1.42598e+06	0.0403225806451613	1.24012e+07	0.0482954545454545	5.54557e+06	0.0148975791433892	8.40598e+07	0.134366925064599	4.0334e+06	0.0207838479809976	8.18996e+06	0.0843672456575683	3.18568e+07	0.0251572327044025	1.56064e+06	0.00314465408805032	3.99427e+06	0.0193370165745856	4.15705e+06	0.012987012987013	0	0.00694444444444444	0	0.0251798561151079	1.00594e+07	0.244635193133047	2.74883e+07	0.0943661971830985	1.33523e+07	0.0722543352601156	2.67e+07	0.0333333333333333	3.14516e+07	0.205357142857143	1.68781e+07
11	4	38030667	40032280	659076	0.329272277272242	0.050314465408805	5.21472e+07	0.111984282907662	6.96558e+07	0.0416666666666667	1.89949e+07	0.0164835164835165	8.8239e+07	0.00208768267223382	1.3294e+06	0.0383064516129032	3.27304e+07	0.0511363636363636	3.2491e+06	0.0167597765363128	1.8137e+08	0.135658914728682	4.53283e+07	0.0207838479809976	3.778e+07	0.0856079404466501	8.76804e+07	0.0251572327044025	0	0.00524109014675053	9.12139e+06	0.0193370165745856	2.19411e+07	0.012987012987013	0	0.00694444444444444	1.26082e+06	0.026978417266187	2.74031e+07	0.238197424892704	1.46615e+07	0.108450704225352	3.03811e+07	0.0693641618497109	3.54472e+07	0.0275862068965517	1.42819e+08	0.214285714285714	1.12403e+08
13	4	40032281	42033894	776304	0.38783901391577	0.0566037735849057	2.17599e+07	0.113948919449902	2.11434e+07	0.0421686746987952	9.97735e+06	0.0146520146520147	4.54109e+07	0.00208768267223382	1.69476e+06	0.0362903225806451	1.66442e+07	0.0426136363636364	1.96778e+07	0.0167597765363128	6.9127e+07	0.138242894056847	1.23434e+06	0.0213776722090261	1.30513e+07	0.0831265508684864	3.31148e+07	0.0283018867924528	944103	0.00838574423480084	5.74977e+06	0.0193370165745856	527264	0.012987012987013	1.18219e+06	0.00694444444444444	335836	0.0287769784172662	1.12621e+07	0.229613733905579	1.07339e+07	0.101408450704225	1.15657e+07	0.0751445086705202	3.18181e+07	0.0275862068965518	4.41697e+07	0.1875	2.08732e+07
9	4	42033895	45036315	815632	0.407487157863604	0.0681341719077568	3.83942e+07	0.106090373280943	2.16018e+06	0.0441767068273092	6.97718e+06	0.0183150183150184	1.7729e+07	0.00208768267223382	1.05458e+06	0.0352822580645161	2.01237e+07	0.0426136363636364	9.39494e+06	0.0139664804469273	4.1198e+07	0.138242894056848	5.97788e+06	0.0195961995249406	3.54129e+06	0.0781637717121588	1.1974e+07	0.0283018867924528	1.4565e+06	0.00628930817610063	3.2377e+06	0.0193370165745856	4.02896e+06	0.012987012987013	4.66184e+06	0.0104166666666667	486796	0.0287769784172662	7.36784e+06	0.225321888412018	8.27978e+06	0.0957746478873239	1.53766e+07	0.0953757225433526	2.35369e+07	0.0287356321839081	3.77851e+07	0.178571428571428	1.1111e+07
12	4	46037123	48038736	1115870	0.55748510951662	0.0922431865828092	6.0709e+06	0.100196463654224	5.14124e+07	0.0486947791164658	9.75164e+06	0.0183150183150183	2.29631e+07	0.00208768267223382	1.09928e+06	0.033266129032258	2.18535e+07	0.0426136363636364	1.67373e+07	0.0121042830540037	5.42185e+07	0.164082687338501	6.14173e+06	0.0190023752969121	1.156e+06	0.0818858560794044	3.03621e+07	0.0220125786163522	1.59442e+06	0.00628930817610063	4.82576e+06	0.0193370165745856	7.85301e+06	0.012987012987013	2.09028e+06	0.0104166666666667	687207	0.0287769784172662	6.15245e+06	0.223175965665237	8.36636e+06	0.0830985915492957	2.15636e+07	0.0838150289017341	2.57623e+07	0.0356321839080459	4.21063e+07	0.160714285714286	2.36759e+07
9	4	48038737	49039543	480646	0.480258431445823	0.0880503144654088	3.51348e+07	0.0785854616895874	3.77844e+07	0.0411646586345382	1.37178e+07	0.0293040293040293	2.67497e+07	0.00208768267223382	1.74103e+06	0.0282258064516129	2.19004e+07	0.0340909090909091	2.64795e+07	0.0130353817504655	6.99903e+07	0.152454780361757	1.24068e+07	0.0190023752969121	1.46738e+07	0.0694789081885856	4.76109e+07	0.0188679245283019	0	0.00209643605870021	6.17107e+06	0.0220994475138122	6.26667e+06	0.012987012987013	1.07614e+07	0.0138888888888889	2.66735e+06	0.0287769784172662	1.25333e+07	0.1931330472103	1.06999e+07	0.047887323943662	1.30486e+07	0.069364161849711	2.99738e+07	0.0137931034482759	4.59721e+06	0.142857142857143	1.73378e+07
7	4	52041965	54043578	519317	0.259449124556483	0.158280922431866	4.18023e+07	0.081532416502947	4.40876e+07	0.0672690763052209	1.08274e+07	0.0494505494505495	2.23244e+07	0.00208768267223382	1.66894e+06	0.0493951612903226	1.79486e+07	0.0340909090909091	1.93595e+07	0.0251396648044692	5.2888e+07	0.189922480620155	8.66663e+06	0.0540380047505939	8.8236e+06	0.0880893300248139	2.74306e+06	0.0345911949685535	0	0.00628930817610063	9.50516e+06	0.0220994475138122	5.21101e+06	0.012987012987013	2.38203e+06	0.0902777777777777	9.73493e+06	0.0287769784172662	1.04374e+07	0.236051502145923	8.91905e+06	0.0549295774647887	1.30103e+07	0.0895953757225433	2.83457e+07	0.0264367816091954	4.49684e+07	0.169642857142857	1.03434e+06
8	4	54043579	56045192	585382	0.292454988824019	0.162473794549266	8.34317e+07	0.0844793713163065	8.34477e+07	0.0677710843373494	1.68648e+07	0.0476190476190476	4.23097e+07	0.00208768267223382	4.35924e+06	0.0544354838709677	3.33033e+06	0.03125	2.4017e+07	0.0260707635009311	1.28013e+08	0.189922480620155	2.67456e+07	0.0659144893111639	3.13485e+07	0.0980148883374692	5.9165e+07	0.0283018867924528	2.12334e+06	0.00628930817610063	1.05552e+07	0.0220994475138122	1.12353e+07	0.0194805194805195	2.07383e+06	0.121527777777778	5.68401e+07	0.0323741007194245	1.2554e+07	0.218884120171674	2.26539e+07	0.0450704225352113	3.27624e+07	0.104046242774567	2.98036e+07	0.0321839080459771	6.87066e+07	0.151785714285714	6.53899e+07
17	4	56045193	58046806	620603	0.310051288610091	0.151991614255766	6.93261e+07	0.0746561886051081	4.9148e+07	0.0697791164658634	1.86484e+07	0.043956043956044	5.9509e+06	0.00208768267223382	3.22041e+06	0.0564516129032258	2.47766e+07	0.0426136363636364	3.65928e+07	0.0270018621973929	1.01209e+07	0.186046511627907	1.45507e+07	0.0492874109263658	1.89119e+07	0.0955334987593053	5.23542e+07	0.0345911949685535	2.09641e+06	0.00943396226415092	1.17496e+06	0.0193370165745856	1.06422e+06	0.0324675324675325	1.12585e+07	0.111111111111111	0	0.0287769784172662	217788	0.195278969957081	1.22363e+07	0.047887323943662	2.25704e+07	0.115606936416185	2.28795e+07	0.0275862068965518	8.18947e+07	0.116071428571428	6.46296e+06
2	4	65052456	67054069	474909	0.23726302873581	0.10482180293501	3.47136e+07	0.0520628683693516	5.56683e+06	0.0667670682730924	4.80185e+06	0.0494505494505495	1.28772e+07	0.00208768267223382	302644	0.0483870967741935	1.75033e+07	0.0227272727272727	6.10028e+06	0.0195530726256983	4.54636e+07	0.160206718346253	1.60738e+06	0.0148456057007126	3.06453e+06	0.0744416873449132	2.95567e+07	0.0314465408805031	266729	0.0167714884696017	1.48638e+06	0.0220994475138122	5.67347e+06	0.025974025974026	556399	0.0486111111111111	0	0.0377697841726618	7.06881e+06	0.150214592274678	5.16656e+06	0.030985915492957702	8.22338e+06	0.0895953757225433	3.04722e+07	0.0264367816091954	2.90217e+07	0.0446428571428572	2.4942e+07
13	4	68054877	70056490	528222	0.263898034286331	0.112159329140461	7.27659e+07	0.050098231827112	100358	0.0742971887550201	1.64035e+07	0.0512820512820513	5.8903e+07	0.00208768267223382	4.47248e+06	0.0594758064516129	3.34661e+07	0.0227272727272727	2.61297e+07	0.0186219739292365	1.42172e+08	0.164082687338502	1.79227e+07	0.0124703087885986	2.9187e+07	0.0806451612903226	6.42219e+07	0.0345911949685535	3.53426e+06	0.00943396226415092	1.31742e+07	0.0193370165745856	1.74818e+07	0.025974025974026	0	0.0416666666666667	0	0.0359712230215827	1.48663e+07	0.148068669527897	3.86949e+07	0.028169014084507	3.46953e+07	0.101156069364162	3.31337e+06	0.0275862068965518	9.39731e+07	0.0357142857142857	3.81758e+06
26	4	70056491	72058104	449335	0.22448633952400401	0.114255765199162	1.30122e+08	0.0550098231827112	1.64514e+08	0.0808232931726907	3.31458e+07	0.0512820512820513	5.97015e+07	0.00208768267223382	4.69777e+06	0.0635080645161291	7.67474e+07	0.0227272727272727	3.09514e+07	0.0195530726256983	1.7426e+08	0.164082687338501	3.17108e+07	0.0124703087885986	4.90409e+07	0.0918114143920596	8.60437e+07	0.0314465408805031	6.97605e+06	0.0146750524109015	9.06273e+06	0.0220994475138122	1.73991e+06	0.025974025974026	3.53054e+06	0.0520833333333333	277012	0.0323741007194245	2.03694e+07	0.148068669527897	4.59789e+07	0.030985915492957702	3.34834e+07	0.092485549132948	6.18051e+07	0.0367816091954023	9.11539e+07	0.0803571428571428	8.81695e+06
6	4	72058105	74059718	796488	0.397922876238875	0.119496855345912	2.99592e+07	0.0520628683693516	3.06605e+07	0.0853413654618474	8.63504e+06	0.0604395604395604	2.57708e+07	0.00208768267223382	504187	0.0675403225806452	3.1059e+07	0.0227272727272727	1.32406e+07	0.0195530726256983	5.54145e+07	0.166666666666666	7.3878e+06	0.0136579572446556	9.93573e+06	0.101736972704715	1.99973e+07	0.0314465408805031	1.73479e+06	0.0241090146750524	2.92853e+06	0.0220994475138122	7.03372e+06	0.025974025974026	5.13896e+06	0.0625	1.91271e+06	0.0323741007194245	8.31791e+06	0.150214592274678	1.24495e+07	0.0295774647887324	8.78743e+06	0.11849710982659	1.58124e+07	0.0482758620689656	3.95983e+07	0.0892857142857143	1.46802e+07
19	4	74059719	76061332	502843	0.25121876645547	0.116352201257861	2.7381e+07	0.0530451866404715	3.59199e+07	0.088855421686747	9.47407e+06	0.0604395604395604	3.0059e+07	0.00208768267223382	4.34479e+06	0.061491935483871	2.34681e+07	0.0284090909090909	1.73517e+07	0.0186219739292365	8.46876e+07	0.147286821705426	1.49377e+07	0.0130641330166271	1.96369e+07	0.106699751861042	4.13758e+07	0.0314465408805031	0	0.0209643605870021	3.83511e+06	0.0220994475138122	9.43651e+06	0.012987012987013	3.34608e+06	0.0381944444444444	0	0.0323741007194245	8.16744e+06	0.143776824034335	2.011e+07	0.028169014084507	6.49727e+07	0.124277456647399	3.11801e+07	0.0494252873563218	4.00037e+07	0.0535714285714286	3.14554e+07
19	4	76061333	78062946	823007	0.411171684450649	0.111111111111111	4.33435e+07	0.0520628683693516	3.95378e+07	0.0873493975903614	1.51512e+07	0.0567765567765568	3.39266e+06	0.00208768267223382	2.84743e+06	0.0554435483870968	2.46556e+07	0.0284090909090909	1.8516e+06	0.015828677839851	9.04714e+07	0.121447028423773	1.82462e+07	0.0130641330166271	1.91315e+07	0.102977667493796	5.0715e+07	0.0314465408805031	3.71798e+06	0.0209643605870021	1.13312e+07	0.0220994475138122	1.11807e+07	0.012987012987013	3.52168e+06	0.0138888888888889	1.55606e+06	0.0323741007194245	1.69275e+07	0.156652360515022	2.08387e+06	0.030985915492957702	2.00973e+07	0.104046242774567	2.65698e+07	0.0413793103448276	6.30108e+06	0.0625	4.17558e+06
9	4	78062947	80064560	861032	0.430168853735036	0.0964360587002095	1.73328e+07	0.0432220039292731	1.89811e+07	0.0687751004016064	8.09091e+06	0.0549450549450549	3.64725e+07	0.00208768267223382	1.63658e+06	0.0493951612903226	1.46774e+07	0.0284090909090909	1.30719e+07	0.0148975791433892	4.10144e+09	0.0994832041343671	5.0702e+06	0.0136579572446556	1.04476e+07	0.0732009925558313	2.26129e+07	0.0314465408805031	599452	0.0209643605870021	4.15598e+06	0.0220994475138122	4.47049e+06	0.012987012987013	0	0.00694444444444444	0	0.0323741007194245	5.68133e+06	0.148068669527897	6.76627e+06	0.0267605633802817	1.66012e+07	0.0780346820809248	1.42615e+07	0.0310344827586207	2.42327e+07	0.0625	1.04305e+07
7	4	80064561	82066174	268019	0.13390144153668	0.0754716981132075	5.03632e+07	0.0333988212180747	4.758e+07	0.0592369477911646	1.82127e+07	0.0476190476190476	2.99439e+07	0.00208768267223382	4.37048e+06	0.0453629032258065	3.70122e+07	0.0284090909090909	2.68067e+07	0.0130353817504655	1.07298e+08	0.0813953488372093	2.00992e+07	0.0130641330166271	2.18903e+07	0.0595533498759306	4.2156e+06	0.0314465408805031	3.42993e+06	0.0178197064989518	8.19657e+06	0.0220994475138122	7.79045e+06	0.012987012987013	5.85365e+06	0.00347222222222222	5.331e+06	0.0323741007194245	1.21824e+07	0.145922746781116	1.89219e+07	0.0225352112676056	2.15209e+07	0.0635838150289017	5.38852e+07	0.0195402298850575	9.61644e+07	0.0535714285714286	0
11	4	82066175	84067788	487381	0.243494000341724	0.0628930817610063	3.13817e+07	0.0324165029469548	268337	0.052710843373494	1.43059e+07	0.0494505494505495	2.76054e+07	0.00208768267223382	4.13058e+06	0.0403225806451613	1.94345e+07	0.0284090909090909	1.24186e+07	0.0139664804469273	6.47902e+07	0.0710594315245478	7.68562e+06	0.0130641330166271	1.36259e+07	0.0533498759305211	4.61141e+07	0.0314465408805031	0	0.0167714884696017	2.54933e+06	0.0248618784530387	1.59859e+07	0.012987012987013	0	0	0	0.0323741007194245	1.44096e+07	0.148068669527897	1.33003e+07	0.0169014084507042	1.28661e+07	0.069364161849711	2.34106e+07	0.0206896551724138	5.79821e+07	0.0446428571428572	2.02217e+07
7	4	84067789	86069402	371465	0.18558273473307	0.0587002096436059	5.35328e+07	0.0265225933202358	5.35753e+06	0.0552208835341366	2.10514e+07	0.0494505494505495	4.30163e+09	0.00208768267223382	3.16995e+06	0.0372983870967742	3.28296e+07	0.0284090909090909	2.79154e+07	0.0148975791433892	1.33296e+08	0.0594315245478036	1.89758e+07	0.0124703087885986	1.81878e+07	0.0620347394540943	6.57876e+07	0.0314465408805031	1.32765e+06	0.0146750524109015	1.40281e+07	0.0248618784530387	1.50116e+07	0.012987012987013	4.03827e+06	0	0	0.0323741007194245	2.88391e+07	0.145922746781116	1.88116e+07	0.0140845070422535	2.55845e+07	0.0578034682080924	2.53553e+07	0.0172413793103448	9.54201e+07	0.0357142857142857	7.05653e+07
7	4	86069403	88071016	548762	0.274159753079265	0.0576519916142558	2.19787e+07	0.0284872298624755	238535	0.0512048192771084	1.60154e+07	0.0421245421245422	2.26746e+07	0.00208768267223382	1.42278e+06	0.033266129032258	1.39148e+07	0.0227272727272727	2.09845e+07	0.0139664804469273	6.41231e+07	0.0555555555555556	6.92817e+06	0.0136579572446556	6.13857e+06	0.0682382133995038	3.56777e+07	0.0314465408805031	986535	0.0167714884696017	1.79746e+06	0.0248618784530387	6.82294e+06	0.012987012987013	3.00071e+06	0	4.35068e+06	0.0323741007194245	1.43037e+07	0.148068669527897	4.1539e+06	0.0126760563380282	1.83823e+07	0.0520231213872832	2.94327e+06	0.0183908045977011	4.3887e+07	0.0357142857142857	6.18491e+07
21	4	88071017	90072630	881711	0.440500016486696	0.0576519916142558	5.22197e+07	0.0255402750491159	4.60737e+07	0.0522088353413654	1.6146e+07	0.0402930402930403	3.48317e+07	0.00208768267223382	1.91197e+06	0.0302419354838709	2.42193e+07	0.0284090909090909	2.79619e+07	0.0148975791433892	1.13078e+08	0.0490956072351421	1.52438e+07	0.0130641330166271	1.58996e+07	0.0694789081885856	6.00941e+07	0.0314465408805031	1.07071e+06	0.019916142557652	6.48017e+06	0.0248618784530387	8.48669e+06	0.012987012987013	6.51349e+06	0	0	0.0323741007194245	1.20154e+07	0.145922746781116	9.51839e+06	0.0140845070422535	1.7723e+07	0.046242774566474	2.5621e+07	0.025287356321839	6.90906e+07	0.0535714285714286	3.62754e+07
4	4	90072631	94075858	1019870	0.509523814281875	0.050314465408805	3.87925e+07	0.024557956777996	5.4553e+07	0.0567269076305221	6.85519e+06	0.0421245421245422	1.76137e+07	0.00208768267223382	1.23194e+06	0.0262096774193548	1.4134e+07	0.0227272727272727	1.12157e+07	0.0148975791433892	4.77774e+07	0.0439276485788113	1.19214e+07	0.0148456057007126	8.94071e+06	0.0570719602977667	2.17011e+07	0.0314465408805031	4.06114e+06	0.0188679245283019	3.89977e+06	0.0248618784530387	7.47161e+06	0.012987012987013	0	0	0	0.0341726618705036	120177	0.141630901287554	1.34623e+07	0.0140845070422535	1.70652e+07	0.0317919075144509	1.09049e+07	0.0275862068965517	3.17819e+07	0.0267857142857143	5.48396e+07
6	4	94075859	96077472	994173	0.496685674660549	0.0419287211740042	1.64331e+07	0.0206286836935167	1.92898e+07	0.054718875502008	4.06097e+06	0.043956043956044	1.47218e+07	0.00208768267223382	726433	0.0211693548387097	7.2166e+06	0.0227272727272727	7.68915e+06	0.0186219739292365	3.28913e+07	0.041343669250646	3.81392e+06	0.0124703087885986	4.25926e+06	0.0521091811414392	1.48974e+07	0.0377358490566038	912468	0.00943396226415092	3.72506e+06	0.0248618784530387	2.42789e+06	0.012987012987013	0	0	2.37894e+06	0.0341726618705036	4.58163e+06	0.135193133047211	4.29305e+06	0.0140845070422535	6.20765e+06	0.0260115606936416	1.2825e+07	0.0229885057471264	2.7773e+07	0.0267857142857143	2.53109e+07
3	4	96077473	99079893	964884	0.482052983242524	0.039832285115304	1.79865e+07	0.0225933202357564	2.17656e+07	0.0522088353413654	1.22033e+06	0.043956043956044	6.53275e+06	0.00208768267223382	453783	0.0201612903225806	1.5963e+07	0.0227272727272727	6.76524e+06	0.0186219739292365	2.88849e+07	0.0335917312661499	3.68104e+06	0.0118764845605701	3.9317e+06	0.0421836228287841	1.04474e+07	0.0377358490566038	0	0.0104821802935011	1.04617e+06	0.0248618784530387	2.09923e+06	0.012987012987013	0	0	0	0.0323741007194245	2.1114e+06	0.133047210300429	2.157e+06	0.0140845070422535	4.48525e+06	0.023121387283237	1.23044e+07	0.0241379310344828	2.05889e+07	0.0178571428571429	0
16	4	99079894	101081507	776112	0.3877430913253	0.0366876310272537	3.8407e+07	0.0196463654223969	4.60432e+07	0.053714859437751	1.7418e+07	0.0421245421245422	3.0991e+07	0.00208768267223382	2.81805e+06	0.0201612903225806	1.74088e+07	0.0227272727272727	3.12727e+07	0.0167597765363128	8.20499e+07	0.0335917312661499	7.81315e+06	0.0118764845605701	1.39284e+06	0.0421836228287841	4.54193e+07	0.0440251572327044	3.9877e+06	0.0115303983228511	7.75201e+06	0.0248618784530387	5.82616e+06	0.012987012987013	39225.2	0	0	0.039568345323741	1.14384e+07	0.130901287553648	2.33071e+07	0.0169014084507042	1.94742e+07	0.023121387283237	3.52482e+07	0.0241379310344828	5.68212e+07	0	4.61931e+07
5	4	101081508	103083121	713696	0.35656025587351	0.0377358490566038	1.15415e+06	0.0216110019646365	9.08424e+06	0.053714859437751	4.42163e+06	0.0402930402930403	1.41532e+07	0.00208768267223382	0	0.0201612903225806	4.34934e+06	0.0227272727272727	3.16461e+06	0.0186219739292365	2.33851e+06	0.0374677002583979	3.37057e+06	0.0118764845605701	1.35459e+06	0.0409429280397022	9.32512e+06	0.0471698113207547	1.40634e+06	0.00733752620545071	2.89042e+06	0.0248618784530387	2.4875e+06	0.012987012987013	0	0	1.94042e+06	0.0359712230215827	2.10886e+06	0.126609442060086	2.52153e+06	0.0154929577464788	4.82689e+06	0.0260115606936416	1.38152e+07	0.0264367816091954	2.46095e+07	0	0
11	4	103083122	105084735	761630	0.380507930100409	0.0377358490566038	2.95944e+07	0.0216110019646365	2.88639e+07	0.056726907630522	8.7086e+06	0.0402930402930403	2.01528e+07	0.00208768267223382	1.43925e+06	0.0201612903225806	1.22926e+07	0.0227272727272727	1.09509e+06	0.0186219739292365	4.98091e+07	0.0335917312661499	6.7674e+06	0.0130641330166271	7.01952e+06	0.0372208436724566	2.74738e+07	0.050314465408805	582501	0.0104821802935011	3.94999e+06	0.0248618784530387	891406	0.012987012987013	0	0	0	0.0377697841726618	8.04541e+06	0.11587982832618	9.59502e+06	0.0154929577464788	1.42934e+07	0.0289017341040462	1.51947e+07	0.0252873563218391	4.39411e+07	0.00892857142857145	2.34864e+07
10	4	106085543	108087156	801395	0.400374397860926	0.0387840670859539	2.37168e+06	0.024557956777996	1.7459e+06	0.052710843373494	6.71814e+06	0.0421245421245422	1.75439e+07	0.00208768267223382	1.75174e+06	0.0201612903225806	1.16998e+07	0.0227272727272727	7.16723e+06	0.015828677839851	4.89992e+07	0.0439276485788113	7.00051e+06	0.0136579572446556	5.71537e+06	0.0459057071960298	1.65234e+07	0.0440251572327044	0	0.00838574423480084	3.00415e+06	0.0248618784530387	5.70168e+06	0.012987012987013	1.99055e+06	0	0	0.0359712230215827	5.74399e+06	0.120171673819742	7.19663e+06	0.0140845070422535	1.0121e+07	0.0289017341040462	2.86198e+07	0.0229885057471265	2.99032e+07	0	2.96713e+06
9	4	108087157	110088770	661827	0.330646668138812	0.0377358490566038	2.44351e+07	0.024557956777996	2.33021e+07	0.0522088353413655	71898.7	0.0421245421245422	2.14245e+07	0.00208768267223382	1.65081e+06	0.0201612903225806	1.24515e+07	0.0227272727272727	1.26479e+07	0.0148975791433892	3.55302e+07	0.041343669250646	509012	0.0142517814726841	5.31095e+06	0.0471464019851117	2.40076e+07	0.0440251572327044	1.20017e+06	0.0115303983228511	3.81527e+06	0.0248618784530387	5.97794e+06	0.012987012987013	0	0	0	0.0359712230215827	5.39573e+06	0.141630901287554	43174	0.0126760563380282	4.83401e+06	0.0289017341040462	8.70373e+06	0.0206896551724138	3.08737e+07	0.00892857142857145	1.23013e+07
12	4	110088771	112090384	700361	0.349898132207309	0.0345911949685535	4.28025e+07	0.024557956777996	3.08076e+07	0.05070281124498	1.10934e+07	0.0421245421245422	3.25046e+07	0.00208768267223382	43920.6	0.0231854838709677	2.54309e+07	0.0227272727272727	1.56091e+07	0.0148975791433892	5.88024e+07	0.0529715762273902	1.32711e+06	0.0148456057007126	1.81706e+07	0.0446650124069479	3.54248e+07	0.0440251572327044	604505	0.0115303983228511	907701	0.0248618784530387	9.99187e+06	0.012987012987013	7.15536e+06	0	0	0.0359712230215827	7.27585e+06	0.137339055793991	7.48259e+06	0.0154929577464788	1.12993e+07	0.0289017341040462	2.89018e+07	0.0172413793103448	6.3451e+07	0	3.16571e+07
9	4	113091192	115092805	827401	0.413366912901289	0.0366876310272537	5.34284e+07	0.0206286836935167	6.01534e+07	0.0486947791164659	1.66447e+07	0.0366300366300366	3.65311e+07	0.00208768267223382	310927	0.0241935483870968	2.72229e+07	0.0227272727272727	2.46006e+06	0.0167597765363128	9.09843e+07	0.0568475452196383	2.09903e+07	0.0136579572446556	1.28436e+07	0.0384615384615384	3.57415e+07	0.0440251572327044	1.46799e+06	0.00838574423480081	7.36066e+06	0.0248618784530387	693880	0.012987012987013	1.12328e+07	0	1.48049e+06	0.0359712230215827	1.06618e+07	0.137339055793991	1.70026e+07	0.0225352112676056	2.08768e+07	0.0289017341040462	2.85334e+07	0.0160919540229885	6.86321e+07	0	4.62495e+07
2	4	115092806	116093612	302629	0.302384975324913	0.0356394129979036	4.24659e+07	0.0235756385068762	3.91098e+07	0.0481927710843374	7.53008e+06	0.0402930402930403	1.5251e+07	0.00208768267223382	138548	0.0221774193548387	1.63583e+07	0.0227272727272727	6.00796e+06	0.0167597765363128	3.09277e+06	0.0542635658914729	786756	0.0130641330166271	7.82615e+06	0.0397022332506203	1.56288e+07	0.0440251572327044	0	0.010482180293501	7.35941e+06	0.0248618784530387	4.0053e+06	0.012987012987013	0	0	0	0.0323741007194245	5.41701e+06	0.137339055793991	1.81338e+07	0.0225352112676056	7.57884e+06	0.0346820809248555	1.85292e+07	0.0183908045977011	2.54183e+06	0	2.54183e+06
7	4	118095227	120096840	615596	0.307549807305505	0.0335429769392034	1.9736e+07	0.0206286836935167	2.31815e+07	0.0476907630522088	7.84639e+06	0.0421245421245422	1.4913e+07	0.00208768267223382	169182	0.0241935483870968	1.15479e+07	0.0227272727272727	1.29507e+07	0.021415270018622	485804	0.058139534883721	2.36921e+06	0.0136579572446556	7.2663e+06	0.043424317617866	2.68369e+07	0.0377358490566038	0	0.00943396226415092	3.66248e+06	0.0248618784530387	2.45802e+06	0.012987012987013	0	0	0	0.0341726618705036	6.74389e+06	0.139484978540772	9.41265e+06	0.0211267605633803	1.00249e+07	0.0346820809248555	2.27174e+07	0.0183908045977011	3.0486e+07	0	1.49757e+07
9	4	120096841	122098454	474040	0.236828879094571	0.0345911949685535	2.92301e+07	0.0235756385068762	2.29471e+07	0.0522088353413654	1.26039e+07	0.0402930402930403	2.79599e+07	0.00208768267223382	1.01816e+06	0.0231854838709677	2.43881e+06	0.0227272727272727	1.78753e+07	0.0223463687150838	6.43752e+07	0.0581395348837209	1.44966e+07	0.0142517814726841	8.39049e+06	0.043424317617866	3.28565e+07	0.0377358490566038	1.28395e+06	0.00943396226415092	6.75192e+06	0.0248618784530387	5.56958e+06	0.012987012987013	0	0	0	0.0323741007194245	9.30826e+06	0.145922746781116	8.07535e+06	0.0211267605633803	1.06299e+07	0.023121387283237	1.45785e+07	0.0218390804597701	4.45131e+07	0.0178571428571429	5.03845e+07
15	4	122098455	124100068	781265	0.390317513766391	0.0324947589098532	5.69935e+07	0.024557956777996	4.39684e+07	0.05070281124498	1.98641e+07	0.0402930402930403	3.36026e+07	0.00208768267223382	2.43195e+06	0.0241935483870968	2.73867e+07	0.0227272727272727	2.03026e+07	0.021415270018622	1.15282e+08	0.0594315245478036	1.50708e+07	0.0166270783847981	1.12413e+07	0.0409429280397022	4.53274e+07	0.0377358490566038	621026	0.00943396226415092	8.96381e+06	0.0248618784530387	7.59515e+06	0.012987012987013	1.73862e+06	0	0	0.0323741007194245	1.86444e+07	0.139484978540773	1.17837e+07	0.0253521126760563	2.96279e+07	0.023121387283237	4.82871e+07	0.0206896551724138	8.34054e+07	0.0178571428571429	9.69668e+07
2	4	124100069	125100875	136110	0.136000247800025	0.0314465408805031	8.95975e+06	0.0235756385068762	3.54072e+06	0.0502008032128514	7.80558e+06	0.0402930402930403	1.93342e+07	0.00208768267223382	0	0.0241935483870968	180961	0.0227272727272727	8.90545e+06	0.0204841713221601	4.14169e+06	0.0542635658914729	5.73984e+06	0.0142517814726841	5.81557e+06	0.0397022332506203	1.49939e+07	0.0377358490566038	0	0.010482180293501	1.66222e+06	0.0248618784530387	0	0.012987012987013	0	0	0	0.0323741007194245	3.02346e+06	0.141630901287554	1.80294e+07	0.0225352112676056	3.26533e+06	0.023121387283237	2.04083e+07	0.0229885057471264	1.36477e+06	0.0357142857142857	2.9388e+07
7	4	126101683	129104103	522021	0.260800034372262	0.0283018867924528	7.79248e+07	0.0265225933202358	8.65465e+07	0.0496987951807229	1.83754e+07	0.0476190476190477	4.9991e+07	0.00208768267223382	1.7965e+06	0.0211693548387097	4.8201e+07	0.0227272727272727	4.50309e+07	0.0204841713221601	2.34246e+08	0.0555555555555556	3.75507e+07	0.0130641330166271	1.83871e+07	0.0359801488833747	8.14983e+06	0.0377358490566038	196643	0.0125786163522013	1.86684e+07	0.0248618784530387	1.34582e+07	0.012987012987013	3.13979e+07	0	5.09165e+06	0.0305755395683453	1.23349e+07	0.148068669527897	1.75541e+07	0.0197183098591549	2.85198e+07	0.023121387283237	3.40372e+07	0.0195402298850575	1.88272e+08	0.0178571428571429	1.16412e+08
4	4	129104104	130104910	261459	0.261248172724611	0.0314465408805031	1.13927e+07	0.0275049115913556	1.48532e+07	0.0461847389558233	8.07323e+06	0.043956043956044	3.05162e+07	0.00208768267223382	1.60029e+06	0.0201612903225806	2.34932e+07	0.0227272727272727	927198	0.0204841713221601	5.36964e+07	0.0671834625322997	8.62712e+06	0.0142517814726841	5.5872e+06	0.0347394540942928	2.31799e+06	0.0377358490566038	2.61965e+06	0.00628930817610063	4.27818e+06	0.0248618784530387	927198	0.012987012987013	0	0	6.82981e+06	0.0323741007194245	6.29579e+06	0.145922746781116	6.99639e+06	0.0197183098591549	6.73954e+06	0.0289017341040462	2.45622e+07	0.0229885057471264	4.23658e+07	0.0178571428571429	1.36596e+07
2	4	138111367	139112173	30125	0.0301007087280565	0.0314465408805031	1.43082e+08	0.0275049115913556	2.93832e+08	0.0411646586345382	6.99763e+07	0.043956043956044	1.77513e+08	0.00208768267223382	6.94457e+06	0.0241935483870968	1.23862e+08	0.0227272727272727	1.40827e+08	0.0204841713221601	6.35825e+08	0.0801033591731266	4.70851e+07	0.0142517814726841	4.02093e+07	0.0421836228287841	1.2505e+10	0.0377358490566038	0	0.0146750524109015	5.07347e+07	0.0303867403314917	3.04541e+07	0.012987012987013	6.38366e+07	0.00694444444444444	5.82369e+07	0.0287769784172662	5.44181e+07	0.15450643776824	4.09815e+07	0.0225352112676056	1.32193e+08	0.0404624277456647	3.04541e+08	0.032183908045977	3.38097e+08	0.0535714285714286	1.27673e+06
9	4	139112174	141113787	768424	0.383902190931918	0.0293501048218029	1.21788e+07	0.031434184675835	1.79038e+07	0.0461847389558233	7.67197e+06	0.0476190476190476	1.99643e+07	0.00208768267223382	1.93972e+06	0.030241935483871	1.19121e+07	0.0227272727272727	8.90343e+06	0.021415270018622	3.54849e+07	0.0801033591731266	7.79686e+06	0.0160332541567696	6.99105e+06	0.043424317617866	2.04344e+07	0.0408805031446541	543676	0.0146750524109015	1.35566e+06	0.0303867403314917	9.22453e+06	0.012987012987013	0	0	0	0.0305755395683453	5.38169e+06	0.150214592274678	5.23123e+06	0.0225352112676056	9.59083e+06	0.0520231213872833	2.89173e+07	0.0356321839080459	2.57066e+07	0.0714285714285715	2.46055e+07
9	4	141113788	143115401	683971	0.341709740239627	0.0345911949685535	1.74848e+07	0.0324165029469548	2.75548e+07	0.0512048192771084	8.33277e+06	0.0476190476190476	9.57816e+06	0.00208768267223382	211960	0.030241935483871	1.14612e+07	0.0227272727272727	1.05504e+07	0.0223463687150838	4.33707e+07	0.0917312661498708	2.93672e+06	0.0136579572446556	7.15469e+06	0.0496277915632754	2.65902e+07	0.0440251572327044	0	0.00943396226415092	2.34586e+06	0.0303867403314917	4.26736e+06	0.012987012987013	0	0	1.74684e+06	0.0323741007194245	4.83276e+06	0.150214592274678	6.88864e+06	0.0225352112676056	1.62495e+07	0.0635838150289017	1.66062e+07	0.0344827586206896	3.81856e+06	0.0446428571428572	1.80923e+07
8	4	143115402	145117015	524261	0.261919131261072	0.030398322851153	1.95937e+07	0.0353634577603144	1.63143e+07	0.0552208835341366	730060	0.0476190476190476	2.08586e+07	0.00208768267223382	800900	0.029233870967742	1.17399e+07	0.0227272727272727	4.36572e+06	0.0223463687150838	4.5011e+07	0.0917312661498708	6.62024e+06	0.0124703087885986	5.38048e+06	0.0558312655086848	1.72878e+07	0.0440251572327044	0	0.0125786163522013	3.10493e+06	0.0303867403314917	3.45348e+06	0.012987012987013	1.08253e+07	0	0	0.0323741007194245	3.15087e+06	0.150214592274678	5.76195e+06	0.023943661971831	1.53892e+07	0.0578034682080924	2.00577e+07	0.0390804597701149	2.50525e+07	0.0357142857142857	2.6804e+07
9	4	145117016	147118629	522512	0.261045336413514	0.0272536687631027	3.74598e+07	0.0333988212180747	1.53302e+07	0.055722891566265	1.1915e+07	0.0476190476190476	3.24021e+06	0.00313152400835073	716132	0.0252016129032258	1.72065e+07	0.0227272727272727	1.25215e+07	0.0223463687150838	6.90754e+07	0.0930232558139535	4.32462e+06	0.0112826603325416	9.67631e+06	0.0595533498759305	3.19616e+07	0.0440251572327044	1.18858e+06	0.0136268343815514	6.81557e+06	0.0303867403314917	6.73961e+06	0.012987012987013	3.29145e+06	0	2.95096e+06	0.0323741007194245	7.98741e+06	0.160944206008584	1.14335e+07	0.0197183098591549	1.40757e+07	0.0664739884393064	2.81875e+07	0.0367816091954023	6.93985e+07	0.0535714285714285	2.32535e+07
7	4	147118630	149120243	844331	0.421825087154666	0.0283018867924528	1.85292e+07	0.0324165029469548	1.59161e+07	0.0562248995983936	714640	0.0476190476190476	1.38979e+07	0.00208768267223382	1.06159e+06	0.0241935483870968	754697	0.0227272727272727	6.12747e+06	0.021415270018622	4.00697e+07	0.082687338501292	4.85876e+06	0.0118764845605701	4.93095e+06	0.0607940446650124	1.62153e+07	0.0440251572327044	1.30794e+06	0.0115303983228511	3.42559e+06	0.0303867403314917	3.79082e+06	0.012987012987013	3.06822e+06	0	0	0.0323741007194245	1.55015e+06	0.152360515021459	3.68029e+06	0.0225352112676056	1.15787e+07	0.0491329479768786	1.79221e+06	0.0379310344827586	2.8321e+07	0.0535714285714286	1.8794e+07
2	4	149120244	151121857	359447	0.17957858008587	0.0272536687631027	6.28383e+06	0.031434184675835	3.96895e+06	0.054718875502008	4.15801e+06	0.0476190476190476	6.86416e+06	0.00208768267223382	0	0.0221774193548387	7.45541e+06	0.0227272727272727	0	0.021415270018622	1.49886e+07	0.0775193798449612	1.64288e+06	0.0136579572446556	2.27262e+06	0.0521091811414392	7.9654e+06	0.0440251572327044	0	0.0146750524109015	2.70628e+06	0.0303867403314917	129409	0.012987012987013	0	0	0	0.0323741007194245	1.73077e+06	0.143776824034335	0	0.023943661971831	184464	0.0491329479768786	7.53977e+06	0.032183908045977	2.10505e+07	0.0625	3.80411e+07
7	4	151121858	153123471	974532	0.486873093413615	0.0251572327044025	1.2577e+07	0.0304518664047152	2.12834e+07	0.052710843373494	1.39251e+07	0.0421245421245422	3.39417e+07	0.00208768267223382	2.95391e+06	0.0191532258064516	1.08954e+07	0.0227272727272727	693679	0.0223463687150837	5.74236e+07	0.0645994832041343	1.35032e+07	0.0118764845605701	8.18717e+06	0.0496277915632755	2.21353e+07	0.0377358490566038	3.1786e+06	0.0115303983228511	4.06008e+06	0.0303867403314917	872515	0.012987012987013	0	0	0	0.0323741007194245	1.16395e+07	0.139484978540773	1.27178e+07	0.0211267605633803	2.26643e+07	0.046242774566474	2.0229e+07	0.0333333333333334	3.40294e+06	0.0357142857142857	8.26953e+06
10	4	153123472	155125085	515892	0.257738005429618	0.0283018867924528	2.89195e+07	0.0304518664047152	3.51148e+06	0.053714859437751	1.33491e+07	0.0421245421245422	6.96536e+07	0.00208768267223382	2.03061e+06	0.0161290322580645	3.30952e+06	0.0340909090909091	3.09037e+07	0.0204841713221601	1.28428e+08	0.0684754521963825	1.11538e+06	0.0130641330166271	1.84367e+07	0.0446650124069479	5.49833e+07	0.0314465408805031	0	0.0125786163522012	8.78414e+06	0.0303867403314917	6.58114e+06	0.012987012987013	0	0	3.26209e+06	0.0323741007194245	1.50778e+07	0.133047210300429	1.18756e+06	0.0267605633802817	1.63542e+07	0.046242774566474	4.05632e+07	0.035632183908046	8.6648e+07	0.0357142857142857	1.11266e+08
12	4	155125086	157126699	338112	0.168919681816774	0.0262054507337526	1.65777e+06	0.0225933202357564	1.21269e+08	0.0486947791164659	3.15145e+07	0.043956043956044	9.88391e+07	0.00208768267223382	7.11034e+06	0.0171370967741935	9.03251e+07	0.0284090909090909	6.5172e+07	0.0195530726256983	3.58092e+08	0.065891472868217	3.95097e+07	0.0130641330166271	4.00975e+07	0.0483870967741935	1.35491e+08	0.0314465408805031	0	0.0125786163522013	1.93702e+07	0.0303867403314917	1.72301e+07	0.012987012987013	2.175e+07	0	0	0.0323741007194245	2.87084e+07	0.141630901287554	5.988e+07	0.023943661971831	7.10207e+07	0.0520231213872833	1.20956e+07	0.0344827586206897	2.23698e+08	0.0446428571428572	8.72317e+07
3	4	157126700	159128313	442520	0.221081587159162	0.0251572327044025	3.65915e+07	0.0225933202357564	3.98573e+07	0.0476907630522088	4.98018e+06	0.043956043956044	2.69562e+07	0.00208768267223382	2.56332e+06	0.0181451612903226	2.64085e+07	0.0227272727272727	8.35203e+06	0.0176908752327746	8.93377e+07	0.0607235142118863	3.00405e+07	0.0142517814726841	6.13166e+06	0.0471464019851117	3.06465e+06	0.0314465408805031	0	0.0136268343815514	498534	0.0290055248618784	4.84557e+06	0.012987012987013	0	0	5.77226e+06	0.0305755395683453	6.45136e+06	0.141630901287554	1.42505e+07	0.0225352112676056	1.94425e+07	0.0722543352601156	4.59121e+07	0.0379310344827586	6.86599e+07	0.0535714285714286	0
8	4	159128314	161129927	589462	0.294493343871496	0.0262054507337526	3.15664e+07	0.0206286836935167	4.28123e+07	0.0481927710843374	1.32952e+07	0.0457875457875458	2.00656e+07	0.00208768267223382	839451	0.0231854838709677	1.29211e+07	0.0227272727272727	2.19278e+06	0.0186219739292365	8.48331e+07	0.0633074935400517	6.68725e+06	0.0142517814726841	1.30999e+07	0.0384615384615384	4.17462e+07	0.0314465408805031	0	0.0136268343815514	2.74586e+06	0.0303867403314917	1.65005e+07	0.012987012987013	3.85017e+06	0	0	0.0359712230215827	9.88798e+06	0.135193133047211	1.88876e+06	0.0225352112676056	1.46576e+07	0.0751445086705202	2.05332e+07	0.035632183908046	5.59181e+07	0.0625	1.11227e+07
1	4	162130735	163131541	725650	0.725064872647773	0.0272536687631027	1.67604e+07	0.0196463654223969	1.52018e+07	0.0481927710843374	2.41442e+06	0.0476190476190476	6.12478e+06	0.00208768267223382	0	0.0181451612903226	1.04618e+07	0.0227272727272727	1.68058e+06	0.0223463687150838	1.53507e+07	0.0697674418604651	2.20492e+06	0.0142517814726841	3.20045e+06	0.0397022332506203	5.88502e+06	0.0314465408805031	0	0.0125786163522013	1.50117e+06	0.0248618784530387	1.69089e+06	0.012987012987013	0	0	0	0.0323741007194245	1.13422e+06	0.124463519313305	2.58389e+06	0.0225352112676056	4.85665e+06	0.0751445086705202	9.74396e+06	0.0390804597701149	1.53119e+07	0.0714285714285714	5.30029e+06
8	4	164132349	166133962	83662	0.0417972696034301	0.0283018867924528	3.81084e+08	0.0176817288801572	3.75702e+08	0.0486947791164658	4.72164e+06	0.0476190476190476	1.86944e+08	0.00208768267223382	1.82152e+07	0.0191532258064516	1.4908e+08	0.0255681818181818	6.414e+07	0.0195530726256983	4.1094e+08	0.0723514211886305	4.04709e+07	0.0148456057007126	7.12739e+07	0.0397022332506203	1.47456e+08	0.0314465408805031	0	0.0178197064989518	6.24931e+06	0.0262430939226519	2.91011e+06	0.012987012987013	0	0	0	0.0323741007194245	3.94172e+07	0.120171673819742	5.02752e+07	0.030985915492957702	1.02319e+08	0.069364161849711	1.80564e+08	0.032183908045977	2.72746e+08	0.0535714285714286	1.3179e+08
5	4	166133963	168135576	942692	0.470965930494092	0.0262054507337526	1.12896e+07	0.0176817288801572	1.69873e+07	0.0486947791164659	3.6203e+06	0.0476190476190476	8.33247e+06	0.00208768267223382	444910	0.0201612903225806	5.66974e+06	0.0227272727272727	3.90593e+06	0.0204841713221601	2.98169e+06	0.0684754521963824	6.78408e+06	0.0142517814726841	4.57259e+06	0.043424317617866	1.37512e+07	0.0283018867924528	0	0.0136268343815514	2.3439e+06	0.0276243093922652	1.66074e+06	0.012987012987013	0	0	0	0.0323741007194245	1.30245e+06	0.128755364806867	4.10752e+06	0.030985915492957702	5.90838e+06	0.0722543352601156	1.38161e+07	0.035632183908046	2.42105e+07	0.0535714285714286	0
7	4	168135577	170137190	876565	0.437929091223383	0.0272536687631027	1.7779e+07	0.0216110019646365	1.99614e+07	0.0481927710843374	6.2196e+06	0.0476190476190476	1.25344e+07	0.00208768267223382	687731	0.0191532258064516	9.70346e+06	0.0227272727272727	5.23266e+06	0.0204841713221601	3.27381e+06	0.0645994832041344	5.98201e+06	0.0142517814726841	686692	0.0471464019851117	1.81834e+07	0.0251572327044025	0	0.0167714884696017	3.11865e+06	0.0248618784530387	6.23303e+06	0.012987012987013	0	0	1.09349e+06	0.0323741007194245	6.81993e+06	0.128755364806867	1.10811e+07	0.0394366197183099	1.1392e+07	0.0751445086705202	1.4495e+07	0.0367816091954023	2.50834e+07	0.0714285714285715	2.37464e+07
6	4	170137191	173139611	792574	0.395967454264409	0.0262054507337526	1.13679e+07	0.0216110019646365	1.1948e+07	0.0502008032128514	452447	0.0476190476190476	1.13087e+07	0.00208768267223382	1.07871e+06	0.0171370967741935	7.41063e+06	0.0227272727272727	3.19593e+06	0.021415270018622	2.64154e+07	0.0594315245478036	6.27494e+06	0.0142517814726841	4.08087e+06	0.0471464019851116	1.07197e+07	0.0251572327044025	0	0.0136268343815514	2.26174e+06	0.0248618784530387	2.76213e+06	0.012987012987013	0	0	0	0.0323741007194245	2.63599e+06	0.128755364806867	4.21603e+06	0.032394366197183	2.37117e+06	0.0578034682080925	8.03976e+06	0.0264367816091954	2.97743e+06	0.0535714285714286	0
7	4	173139612	175141225	987323	0.49326343640682	0.0241090146750524	1.89735e+07	0.0196463654223969	2.31103e+07	0.0481927710843374	1.19425e+07	0.0476190476190476	1.50113e+07	0.00208768267223382	1.81902e+06	0.0171370967741935	9.28369e+06	0.0255681818181818	1.339e+06	0.0195530726256983	5.72193e+06	0.0568475452196383	1.50566e+07	0.0142517814726841	5.48572e+06	0.0446650124069479	3.54493e+07	0.0251572327044025	0	0.0167714884696017	4.10779e+06	0.0248618784530387	6.65392e+06	0.012987012987013	0	0.0138888888888889	0	0.0305755395683453	1.29161e+07	0.122317596566523	6.84746e+06	0.028169014084507	9.43016e+06	0.0520231213872833	1.42912e+07	0.0229885057471264	3.4304e+07	0.0535714285714286	0
9	4	175141226	177142839	539184	0.269374614685948	0.0251572327044025	6.88783e+07	0.0196463654223969	4.21104e+07	0.0441767068273092	1.33185e+07	0.0494505494505495	2.98461e+07	0.00208768267223382	779897	0.0191532258064516	3.2726e+07	0.0227272727272727	2.06865e+07	0.0195530726256983	8.57589e+06	0.0516795865633075	1.06297e+07	0.0148456057007126	1.23878e+07	0.0421836228287841	3.91239e+07	0.0251572327044025	1.32564e+06	0.0125786163522013	658800	0.0248618784530387	8.57303e+06	0.012987012987013	0	0.0138888888888889	0	0.0287769784172662	6.69509e+06	0.111587982832618	1.48056e+07	0.032394366197183	1.96019e+07	0.046242774566474	2.6504e+07	0.0183908045977011	5.13743e+07	0.0535714285714286	3.67793e+07
5	4	177142840	179144453	227248	0.113532379369849	0.0241090146750524	9.3132e+07	0.0196463654223969	5.7419e+07	0.0441767068273092	7.33879e+06	0.043956043956044	2.77435e+07	0.00208768267223382	498728	0.0211693548387097	2.64311e+07	0.0227272727272727	3.13829e+07	0.021415270018622	7.83373e+07	0.0607235142118863	1.42058e+07	0.0160332541567696	1.25202e+07	0.043424317617866	5.58437e+07	0.0251572327044025	0	0.0146750524109015	1.01695e+07	0.0248618784530387	1.6811e+07	0.012987012987013	1.61493e+07	0.0138888888888889	0	0.0287769784172662	1.09386e+07	0.0987124463519315	1.6349e+07	0.030985915492957702	2.25474e+07	0.0491329479768786	4.17242e+07	0.0206896551724138	7.89768e+07	0.0625	3.04352e+07
11	4	183147682	185149295	1029220	0.514195044599009	0.0293501048218029	2.66632e+07	0.0216110019646365	2.09369e+07	0.0456827309236948	8.08606e+06	0.043956043956044	2.58532e+07	0.00208768267223382	1.73572e+06	0.030241935483871	1.19081e+06	0.0227272727272727	1.7379e+07	0.0186219739292365	6.23996e+07	0.0555555555555556	9.26512e+06	0.0148456057007126	9.48513e+06	0.0397022332506203	2.61375e+07	0.0251572327044025	0	0.0167714884696017	369689	0.0248618784530387	7.56295e+06	0.012987012987013	3.24792e+06	0.0208333333333333	3.46274e+06	0.0323741007194245	7.39464e+06	0.0965665236051502	1.24035e+07	0.030985915492957702	1.04274e+07	0.0549132947976878	2.59974e+07	0.0126436781609196	4.40404e+07	0.0535714285714286	1.82829e+07
17	4	185149296	187150909	459797	0.229713121510941	0.0324947589098532	6.47811e+07	0.0255402750491159	5.81004e+07	0.0486947791164658	2.88529e+07	0.0476190476190477	7.21672e+07	0.00208768267223382	220418	0.030241935483871	4.77303e+07	0.0255681818181818	4.76358e+07	0.0195530726256983	1.94901e+08	0.062015503875969	4.8794e+07	0.0142517814726841	2.18313e+07	0.0409429280397022	7.66435e+07	0.0220125786163522	975383	0.0157232704402516	1.23713e+07	0.0248618784530387	1.15985e+07	0.012987012987013	0	0.0208333333333333	1.05493e+07	0.0323741007194245	2.8184e+07	0.107296137339056	2.67294e+07	0.0366197183098591	2.8146e+07	0.0606936416184971	4.27902e+07	0.0183908045977011	1.65223e+08	0.0625	1.27065e+08
7	4	187150910	189152523	215440	0.107633140055975	0.0188679245283019	4.15585e+08	0.0147347740667976	4.74689e+08	0.0331325301204819	5.01718e+07	0.0311355311355311	1.24725e+08	0.00104384133611691	2.0655e+07	0.0181451612903226	2.2992e+08	0.0113636363636364	1.09589e+08	0.0121042830540037	3.81651e+08	0.0387596899224806	1.08524e+08	0.00712589073634205	1.48974e+08	0.0235732009925558	1.97039e+08	0.00943396226415095	1.98099e+07	0.00628930817610065	4.04879e+07	0.0165745856353591	3.58086e+07	0.0064935064935065	3.64614e+06	0.0138888888888889	0	0.0179856115107914	3.20927e+07	0.0729613733905581	9.03565e+07	0.0225352112676057	1.19166e+08	0.0404624277456647	2.06002e+08	0.00919540229885055	4.05902e+08	0.0267857142857143	3.15355e+08
13	5	1	1005084	496038	0.493528899077092	0.672955974842767	4.67472e+07	0.493123772102161	4.0962e+07	0.242971887550201	1.75678e+07	0.413919413919414	6.15265e+07	0.0250521920668058	2.15843e+06	0.340725806451613	2.16909e+07	0.113636363636364	2.53666e+07	0.124767225325885	9.61321e+06	0.521963824289406	1.97645e+06	0.0344418052256532	2.04707e+07	0.39454094292804	4.7384e+07	0.0691823899371069	5.59993e+06	0.0461215932914046	1.25438e+06	0.223756906077348	6.50314e+06	0.363636363636364	4.11423e+06	0.0138888888888889	3.14996e+06	0.0935251798561151	1.8029e+07	0.330472103004292	1.66735e+07	0.27887323943662	2.23997e+07	0.433526011560694	2.73774e+07	0.206896551724138	7.11891e+07	0.428571428571429	5.2266e+07
11	5	1005085	2010168	325685	0.324037592877809	0.670859538784067	1.10448e+08	0.495088408644401	4.58092e+07	0.243975903614458	1.80356e+07	0.406593406593407	9.0539e+07	0.0250521920668058	4.62219e+06	0.336693548387097	3.88665e+07	0.113636363636364	4.09394e+07	0.124767225325885	1.09251e+08	0.501291989664083	1.31056e+07	0.0320665083135392	3.42489e+07	0.39454094292804	5.9814e+07	0.0628930817610063	211755	0.0461215932914046	1.36768e+07	0.229281767955801	1.55185e+07	0.363636363636364	1.25325e+07	0.00694444444444444	9.3044e+06	0.100719424460432	3.966e+07	0.347639484978541	2.14218e+07	0.309859154929577	5.09564e+07	0.433526011560694	4.66398e+07	0.206896551724138	1.16101e+08	0.410714285714286	6.57954e+07
2	5	2010169	3015252	6627	0.00659347875401459	0.675052410901468	6.60866e+08	0.49705304518664	1.82538e+07	0.246987951807229	8.72242e+07	0.41025641025641	4.86767e+08	0.0271398747390397	3.25211e+07	0.338709677419355	1.9101e+08	0.119318181818182	8.99391e+08	0.121042830540037	8.36385e+08	0.490956072351421	8.98201e+07	0.0320665083135392	1.16975e+08	0.39454094292804	1.9855e+08	0.0691823899371069	0	0.0419287211740042	1.00376e+07	0.234806629834254	1.64019e+08	0.350649350649351	3.01796e+08	0.0138888888888889	0	0.100719424460432	1.25226e+08	0.369098712446352	1.23687e+08	0.301408450704225	3.1835e+08	0.433526011560694	1.9101e+08	0.2	1.07784e+09	0.446428571428571	5.58881e+08
1	5	5025421	6030504	178671	0.177767231395585	0.683438155136268	1.06001e+08	0.487229862475442	4.37256e+07	0.23995983935743	2.22287e+07	0.413919413919414	7.31618e+07	0.0250521920668058	4.81452e+06	0.338709677419355	4.79733e+07	0.113636363636364	5.18916e+07	0.121042830540037	1.58988e+08	0.511627906976744	7.0401e+06	0.0344418052256532	2.74428e+06	0.421836228287841	7.41139e+07	0.0691823899371069	0	0.0440251572327044	1.62409e+07	0.232044198895028	1.4195e+07	0.350649350649351	0	0.00694444444444444	0	0.0935251798561151	1.82755e+07	0.369098712446352	0	0.301408450704225	3.07002e+07	0.445086705202312	7.99554e+07	0.190804597701149	1.40791e+08	0.428571428571429	6.21875e+07
4	5	6030505	7035588	116183	0.115595313426539	0.666666666666667	7.87975e+07	0.471512770137525	6.59549e+07	0.237951807228916	2.08138e+07	0.406593406593407	8.82781e+07	0.0250521920668058	3.70198e+06	0.328629032258065	2.68972e+07	0.107954545454545	1.69877e+07	0.119180633147114	1.18719e+08	0.488372093023256	2.11217e+07	0.0344418052256532	2.10199e+07	0.411910669975186	5.0402e+07	0.0691823899371069	597716	0.039832285115304	9.58476e+06	0.232044198895028	1.24741e+07	0.350649350649351	1.72142e+07	0.00694444444444444	0	0.0935251798561151	3.14894e+07	0.360515021459227	2.66887e+07	0.301408450704225	1.79315e+07	0.445086705202312	5.66257e+07	0.193103448275862	1.17613e+08	0.428571428571429	6.37564e+07
4	5	7035589	8040672	489321	0.486845875568609	0.679245283018868	2.22136e+06	0.481335952848723	3.48529e+07	0.237951807228916	4.63807e+06	0.417582417582418	3.0522e+07	0.0250521920668058	878988	0.338709677419355	2.27072e+06	0.107954545454545	1.34451e+07	0.11731843575419	4.12479e+07	0.509043927648579	6.63522e+06	0.0344418052256532	6.04163e+06	0.416873449131514	2.97258e+07	0.0691823899371069	0	0.039832285115304	3.18609e+06	0.232044198895028	222136	0.337662337662338	0	0.00694444444444444	6.28815e+06	0.0935251798561151	9.17556e+06	0.369098712446352	7.983e+06	0.301408450704225	1.20215e+07	0.456647398843931	5.24012e+06	0.188505747126437	3.73298e+07	0.428571428571429	4.54144e+07
2	5	9045757	10050840	335201	0.333505458250256	0.683438155136268	4.38718e+07	0.479371316306483	3.3533e+07	0.244979919678715	6.37454e+06	0.41025641025641	7.6988e+06	0.0250521920668058	641567	0.338709677419355	1.89415e+07	0.102272727272727	1.3649e+07	0.11731843575419	3.23075e+07	0.506459948320413	1.52015e+07	0.0344418052256532	6.12741e+06	0.416873449131514	1.48489e+07	0.0691823899371069	0	0.0482180293501048	4.67181e+06	0.232044198895028	1.08483e+06	0.337662337662338	0	0.00694444444444444	0	0.0935251798561151	4.87067e+06	0.377682403433476	2.29483e+06	0.309859154929577	5.05641e+06	0.456647398843931	2.35522e+07	0.193103448275862	2.93739e+07	0.428571428571429	3.31476e+07
5	5	10050841	11055924	209907	0.208845230846377	0.687631027253669	6.44754e+07	0.473477406679764	4.59847e+07	0.244979919678715	1.35921e+07	0.417582417582418	4.98198e+07	0.0250521920668058	3.07356e+06	0.338709677419355	3.18612e+07	0.107954545454545	2.19395e+07	0.11731843575419	7.57412e+07	0.511627906976744	6.06881e+06	0.0344418052256532	1.28262e+07	0.416873449131514	4.27266e+07	0.0691823899371069	0	0.0461215932914046	5.34082e+06	0.232044198895028	6.92948e+06	0.337662337662338	9.52803e+06	0.0138888888888889	0	0.0935251798561151	1.5556e+07	0.377682403433476	1.46585e+07	0.307042253521127	2.01013e+07	0.450867052023121	3.71222e+07	0.2	5.30974e+07	0.428571428571429	7.0578e+07
1	5	11055925	12061008	848040	0.843750373103144	0.683438155136268	1.99422e+07	0.471512770137525	1.12949e+07	0.243975903614458	1.33999e+06	0.417582417582418	4.59425e+06	0.0250521920668058	760768	0.338709677419355	7.11257e+06	0.107954545454545	3.12368e+06	0.121042830540037	1.31021e+06	0.509043927648579	751076	0.0344418052256532	1.05961e+06	0.419354838709677	4.7805e+06	0.0691823899371069	0	0.0440251572327044	525252	0.232044198895028	0	0.337662337662338	2.35838e+06	0.0138888888888889	0	0.0899280575539568	954809	0.390557939914163	1.84248e+06	0.315492957746479	5.49622e+06	0.445086705202312	2.98529e+06	0.195402298850575	1.19001e+07	0.428571428571429	0
1	5	13066093	14071176	252455	0.251178010992116	0.683438155136268	1.52129e+08	0.483300589390963	5.90282e+07	0.246987951807229	1.80821e+07	0.413919413919414	6.64443e+07	0.0250521920668058	5.1111e+06	0.348790322580645	6.68594e+07	0.107954545454545	1.56359e+06	0.119180633147114	1.6755e+08	0.51421188630491	1.24563e+07	0.0344418052256532	3.08198e+07	0.41439205955335	6.57223e+07	0.0691823899371069	5.50153e+06	0.0461215932914046	5.32884e+06	0.232044198895028	4.30555e+06	0.337662337662338	0	0.00694444444444444	6.094e+06	0.0971223021582734	970066	0.386266094420601	1.87139e+07	0.301408450704225	2.31064e+07	0.46242774566474	7.71643e+07	0.188505747126437	1.40088e+08	0.428571428571429	1.06645e+08
2	5	14071177	15076260	524948	0.522292664095737	0.614255765199161	2.59254e+07	0.434184675834971	2.17709e+07	0.230923694779116	7.43914e+06	0.36996336996337	2.85172e+06	0.0250521920668058	2.458e+06	0.318548387096774	167914	0.107954545454545	1.36957e+07	0.106145251396648	3.94719e+06	0.470284237726098	9.74122e+06	0.0344418052256532	5.34552e+06	0.382133995037221	2.42155e+07	0.0691823899371069	2.64576e+06	0.0440251572327044	5.96629e+06	0.229281767955801	550166	0.324675324675325	37352	0.00694444444444444	0	0.0863309352517986	7.71235e+06	0.386266094420601	2.97649e+06	0.284507042253521	9.29244e+06	0.404624277456647	2.43656e+07	0.177011494252874	5.64641e+06	0.428571428571429	2.93069e+06
1	5	15076261	16081344	436510	0.434302008588337	0.675052410901468	1.14545e+07	0.469548133595285	2.88548e+07	0.241967871485944	1.30536e+06	0.41025641025641	4.40557e+06	0.0250521920668058	49266.6	0.348790322580645	1.09438e+06	0.107954545454545	6.02868e+06	0.121042830540037	3.00878e+07	0.501291989664083	2.86362e+06	0.0344418052256532	1.4629e+06	0.411910669975186	6.16385e+06	0.0691823899371069	0	0.0419287211740042	2.04544e+06	0.232044198895028	830036	0.337662337662338	0	0.00694444444444444	0	0.0935251798561151	186252	0.394849785407725	5.36929e+06	0.298591549295775	9.5058e+06	0.456647398843931	6.19162e+06	0.193103448275862	2.37471e+07	0.428571428571429	0
2	5	16081345	17086428	283126	0.281693868373191	0.685534591194969	403657	0.491159135559921	3.46274e+07	0.240963855421687	1.5094e+07	0.41025641025641	3.16974e+07	0.0250521920668058	1.51914e+06	0.350806451612903	1.79974e+07	0.107954545454545	1.8468e+07	0.119180633147114	5.83265e+07	0.496124031007752	8.56242e+06	0.0344418052256532	1.39658e+06	0.41439205955335	3.28194e+07	0.0754716981132075	0	0.0419287211740042	7.06399e+06	0.232044198895028	6.39854e+06	0.337662337662338	1.4128e+06	0	0	0.0935251798561151	1.57935e+07	0.40343347639485	2.87154e+06	0.295774647887324	1.60545e+07	0.456647398843931	4.77297e+06	0.188505747126437	4.61629e+07	0.410714285714286	1.30815e+07
1	5	19096597	20101680	365761	0.363910877100819	0.670859538784067	4.13054e+07	0.473477406679764	3.13056e+07	0.237951807228916	1.16673e+06	0.399267399267399	5.15854e+06	0.0250521920668058	587963	0.340725806451613	1.2937e+07	0.107954545454545	1.07217e+07	0.119180633147114	2.89115e+07	0.483204134366925	4.91142e+06	0.0344418052256532	6.98346e+06	0.404466501240695	1.57966e+07	0.0754716981132075	0	0.039832285115304	2.44656e+06	0.232044198895028	3.96236e+06	0.337662337662338	0	0	4.08064e+06	0.0935251798561151	3.33418e+06	0.390557939914163	430555	0.304225352112676	1.14394e+07	0.433526011560694	1.40206e+07	0.188505747126437	2.24373e+07	0.392857142857143	0
1	5	21106765	22111848	326940	0.325286244731784	0.668763102725367	3.90468e+07	0.467583497053045	4.43623e+07	0.231927710843373	5.64009e+06	0.406593406593407	2.12945e+07	0.0250521920668058	1.97333e+06	0.340725806451613	1.06473e+07	0.107954545454545	5.99738e+06	0.119180633147114	3.01657e+07	0.488372093023256	3.61972e+06	0.0332541567695962	8.58299e+06	0.406947890818859	1.35941e+07	0.0754716981132075	0	0.0419287211740042	3.39852e+06	0.229281767955801	4.41685e+06	0.337662337662338	0	0.00694444444444444	0	0.0899280575539568	6.19163e+06	0.381974248927039	7.05846e+06	0.304225352112676	2.54889e+06	0.445086705202312	2.38338e+07	0.181609195402299	2.7722e+07	0.375	0
1	5	24122017	25127100	105828	0.105292691954105	0.658280922431866	2.65357e+08	0.465618860510805	1.54494e+08	0.236947791164659	1.88716e+07	0.391941391941392	6.49639e+07	0.0250521920668058	2.03211e+06	0.330645161290323	7.35926e+07	0.102272727272727	3.70561e+07	0.11731843575419	1.83377e+08	0.475452196382429	4.3445e+07	0.0344418052256532	6.01866e+06	0.39454094292804	6.63108e+07	0.0754716981132075	0	0.0419287211740042	8.41808e+06	0.232044198895028	2.05419e+07	0.324675324675325	0	0	0	0.0935251798561151	3.87266e+06	0.390557939914163	7.44039e+06	0.301408450704225	1.56835e+07	0.410404624277457	9.33264e+07	0.188505747126437	1.42029e+08	0.410714285714286	1.3499e+08
1	5	26132185	27137268	107196	0.106653772222023	0.647798742138365	2.11451e+07	0.461689587426326	1.07907e+08	0.234939759036145	1.33267e+07	0.388278388278388	5.18261e+07	0.0250521920668058	4.02099e+06	0.340725806451613	5.53892e+07	0.102272727272727	2.42304e+07	0.11731843575419	1.42699e+07	0.48062015503876	2.19499e+07	0.0332541567695962	1.90382e+07	0.384615384615385	2.40224e+07	0.0754716981132075	0	0.0440251572327044	1.2466e+07	0.232044198895028	3.37997e+06	0.324675324675325	0	0	0	0.0899280575539568	1.52305e+07	0.390557939914163	2.93818e+07	0.307042253521127	4.27566e+07	0.416184971098266	4.66435e+06	0.190804597701149	8.03704e+07	0.410714285714286	0
5	5	31157605	32162688	549231	0.546452833792996	0.643605870020964	4.81612e+07	0.444007858546169	2.86781e+07	0.234939759036145	124672	0.384615384615385	2.33142e+07	0.0250521920668058	46885.7	0.320564516129032	2.49036e+07	0.102272727272727	1.89166e+07	0.128491620111732	6.46337e+07	0.467700258397933	1.10652e+07	0.0344418052256532	1.08185e+07	0.367245657568238	2.48281e+07	0.0754716981132075	1.2822e+06	0.039832285115304	1.00704e+07	0.232044198895028	857589	0.311688311688312	1.37413e+07	0	0	0.0863309352517986	1.0237e+07	0.399141630901288	8.4685e+06	0.298591549295775	1.26854e+07	0.398843930635838	3.68481e+07	0.197701149425287	6.40317e+07	0.446428571428571	1.30052e+06
5	5	32162689	33167772	270552	0.269183471232255	0.649895178197065	3.84015e+07	0.453831041257367	2.4641e+06	0.236947791164659	1.27088e+07	0.384615384615385	2.47912e+07	0.0250521920668058	3.16586e+06	0.320564516129032	2.45665e+07	0.0909090909090909	1.66923e+07	0.132216014897579	8.98369e+07	0.462532299741602	1.63366e+07	0.0344418052256532	1.16967e+07	0.379652605459057	2.62906e+07	0.0754716981132075	0	0.039832285115304	4.90639e+06	0.232044198895028	6.69592e+06	0.311688311688312	0	0	5.68638e+06	0.0863309352517986	1.33596e+07	0.40343347639485	1.15505e+07	0.292957746478873	1.34677e+07	0.398843930635838	3.56255e+06	0.2	5.73936e+07	0.428571428571429	5.28021e+07
5	5	33167773	34172856	447485	0.445221493924886	0.639412997903564	9.53667e+07	0.43614931237721	8.33969e+07	0.241967871485944	1.18629e+07	0.384615384615385	3.25049e+07	0.0250521920668058	1.9141e+06	0.316532258064516	2.89436e+07	0.0909090909090909	3.15152e+07	0.132216014897579	8.0841e+07	0.454780361757106	7.24771e+06	0.0344418052256532	1.1315e+06	0.367245657568238	4.39615e+07	0.0754716981132075	157374	0.0356394129979036	6.39895e+06	0.232044198895028	1.05258e+07	0.311688311688312	0	0	0	0.0863309352517986	1.69838e+06	0.390557939914163	1.20331e+07	0.298591549295775	1.63515e+07	0.398843930635838	3.50015e+06	0.202298850574713	7.49531e+07	0.410714285714286	3.08236e+07
7	5	34172857	35177940	314439	0.312848478336139	0.639412997903564	3.82437e+07	0.43811394891945	2.65986e+07	0.241967871485944	1.37278e+07	0.384615384615385	2.69841e+07	0.0250521920668058	4.086e+06	0.310483870967742	3.04696e+07	0.0909090909090909	1.84661e+07	0.134078212290503	7.58596e+07	0.44702842377261	1.36054e+07	0.0332541567695962	1.12718e+07	0.37468982630273	3.29903e+07	0.0754716981132075	223962	0.0419287211740042	4.93611e+06	0.232044198895028	6.91362e+06	0.298701298701299	0	0	4.89272e+06	0.0863309352517986	1.01769e+07	0.390557939914163	1.47919e+07	0.298591549295775	1.55135e+07	0.398843930635838	2.29899e+07	0.206896551724138	5.06855e+07	0.410714285714286	1.09664e+07
7	5	35177941	36183024	226432	0.22528664270847	0.635220125786163	1.85377e+07	0.451866404715128	1.30854e+08	0.240963855421687	2.28103e+06	0.373626373626374	6.34683e+06	0.0250521920668058	3.78273e+06	0.318548387096774	6.13751e+07	0.0909090909090909	6.51127e+07	0.130353817504655	1.84352e+08	0.431524547803618	2.03831e+07	0.0344418052256532	3.95909e+07	0.379652605459057	7.54458e+07	0.0754716981132075	3.08835e+06	0.0419287211740042	685462	0.232044198895028	1.2801e+07	0.298701298701299	0	0	6.79436e+06	0.0863309352517986	1.93545e+07	0.386266094420601	2.73881e+07	0.301408450704225	2.33384e+07	0.398843930635838	5.25754e+07	0.220689655172414	1.20191e+08	0.339285714285714	6.69142e+07
4	5	36183025	37188108	241893	0.240669436584405	0.637316561844864	5.94271e+07	0.44007858546169	5.73337e+07	0.235943775100402	3.60769e+07	0.380952380952381	6.76482e+07	0.022964509394572	8.83346e+06	0.318548387096774	4.22096e+07	0.0909090909090909	5.03507e+07	0.128491620111732	1.75012e+08	0.428940568475452	2.142e+07	0.0356294536817102	3.07967e+07	0.362282878411911	8.73866e+07	0.0754716981132075	2.89095e+06	0.0440251572327044	1.09754e+07	0.229281767955801	1.3432e+07	0.298701298701299	7.65567e+06	0	6.26373e+06	0.0863309352517986	2.31507e+07	0.386266094420601	1.25275e+07	0.287323943661972	2.48044e+07	0.38150289017341	4.80705e+07	0.213793103448276	1.24283e+08	0.392857142857143	4.13406e+07
3	5	37188109	38193192	471430	0.469045373322031	0.641509433962264	2.91666e+07	0.442043222003929	1.0918e+07	0.232931726907631	6.33646e+06	0.384615384615385	1.94013e+06	0.0250521920668058	454220	0.32258064516129	1.02536e+07	0.0852272727272727	9.45761e+06	0.130353817504655	3.64886e+07	0.436692506459948	4.41918e+06	0.0368171021377672	616785	0.364764267990074	2.01602e+07	0.0754716981132075	0	0.0356394129979036	2.34129e+06	0.232044198895028	2.30566e+06	0.298701298701299	3.92816e+06	0	0	0.0827338129496403	5.09089e+06	0.394849785407725	3.31438e+06	0.28169014084507	1.09427e+07	0.404624277456647	7.76051e+06	0.218390804597701	2.40894e+07	0.410714285714286	1.4629e+07
4	5	38193193	39198276	450759	0.448478933104099	0.633123689727463	4.24524e+07	0.44007858546169	2.59093e+07	0.229919678714859	1.25161e+07	0.380952380952381	4.67752e+07	0.0250521920668058	2.8503e+06	0.310483870967742	2.46498e+07	0.0852272727272727	2.96739e+07	0.132216014897579	9.25219e+07	0.423772609819121	1.12044e+07	0.0332541567695962	9.79153e+06	0.362282878411911	3.66691e+07	0.0754716981132075	1.55138e+06	0.0356394129979036	5.85094e+06	0.232044198895028	9.61075e+06	0.298701298701299	0	0	3.36133e+06	0.0863309352517986	9.80052e+06	0.390557939914163	1.36522e+07	0.284507042253521	1.67933e+07	0.404624277456647	4.0582e+07	0.213793103448276	5.75418e+07	0.375	1.43128e+07
2	5	39198277	40203360	98568	0.0980694150936638	0.631027253668763	1.06463e+08	0.428290766208251	9.8889e+07	0.229919678714859	2.42574e+07	0.380952380952381	5.50045e+07	0.0250521920668058	2.17244e+06	0.316532258064516	7.37839e+07	0.0909090909090909	4.52337e+07	0.132216014897579	1.32938e+08	0.421188630490956	3.60492e+07	0.0320665083135392	2.80045e+07	0.357320099255583	6.2884e+07	0.0754716981132075	7.0946e+06	0.0356394129979036	1.11487e+07	0.234806629834254	2.95135e+07	0.298701298701299	0	0.00694444444444444	0	0.0827338129496403	2.0372e+07	0.377682403433476	1.52561e+07	0.287323943661972	1.62324e+07	0.410404624277457	5.01002e+07	0.211494252873563	125638	0.375	9.81801e+07
7	5	40203361	41208444	225786	0.224643910359731	0.633123689727463	2.16047e+08	0.43614931237721	1.13934e+08	0.229919678714859	3.90792e+07	0.373626373626374	9.28228e+07	0.0250521920668058	7.58711e+06	0.3125	1.13052e+08	0.0852272727272727	3.6673e+07	0.132216014897579	1.68383e+08	0.410852713178295	2.83629e+07	0.0320665083135392	5.09969e+07	0.362282878411911	8.96775e+07	0.0817610062893082	3.11899e+06	0.0377358490566038	1.56087e+07	0.234806629834254	1.77159e+07	0.298701298701299	8.2018e+06	0	0	0.079136690647482	2.82325e+07	0.399141630901288	3.77664e+07	0.273239436619718	3.30002e+07	0.416184971098266	8.30432e+07	0.211494252873563	1.09696e+08	0.375	5.7148e+06
4	5	41208445	42213528	364444	0.362600538860434	0.622641509433962	2.67698e+07	0.422396856581532	1.46995e+07	0.231927710843373	8.09298e+06	0.377289377289377	1.7966e+07	0.0250521920668058	0	0.306451612903226	1.07119e+07	0.0909090909090909	3.51783e+06	0.130353817504655	2.97151e+07	0.403100775193798	3.99598e+06	0.0320665083135392	7.2208e+06	0.367245657568238	1.25241e+07	0.0754716981132075	0	0.0335429769392034	6.03056e+06	0.234806629834254	2.99335e+06	0.298701298701299	0	0	0	0.079136690647482	2.19512e+06	0.381974248927039	1.03154e+07	0.270422535211268	964654	0.393063583815029	6.45625e+06	0.211494252873563	2.74391e+07	0.392857142857143	4.57318e+06
4	5	42213529	43218612	247872	0.246618193106248	0.620545073375262	3.91209e+07	0.424361493123772	2.92344e+07	0.231927710843373	1.01564e+07	0.36996336996337	3.34206e+07	0.0250521920668058	863884	0.306451612903226	2.18072e+07	0.0852272727272727	2.31268e+07	0.128491620111732	4.8116e+07	0.403100775193798	5.84687e+06	0.0320665083135392	9.11143e+06	0.367245657568238	1.99227e+07	0.0754716981132075	0	0.0356394129979036	3.57021e+06	0.234806629834254	7.33516e+06	0.298701298701299	0	0	0	0.0755395683453237	6.42923e+06	0.394849785407725	3.07965e+06	0.264788732394366	1.24613e+07	0.393063583815029	0	0.206896551724138	4.23357e+07	0.392857142857143	0
5	5	43218613	44223696	185397	0.184459209379515	0.635220125786163	5.05672e+07	0.416502946954813	4.81592e+07	0.234939759036145	1.98359e+07	0.373626373626374	3.53167e+07	0.0250521920668058	1.155e+06	0.304435483870968	3.71431e+07	0.0852272727272727	3.43556e+07	0.122905027932961	8.82627e+07	0.400516795865633	2.8802e+07	0.0320665083135392	2.09798e+07	0.367245657568238	5.81907e+07	0.0754716981132075	3.77191e+06	0.0314465408805031	8.2982e+06	0.234806629834254	1.56911e+07	0.285714285714286	9.80696e+08	0	0	0.0755395683453237	1.71915e+07	0.386266094420601	1.22587e+07	0.253521126760563	2.67633e+06	0.393063583815029	1.94958e+07	0.202298850574713	6.34568e+07	0.375	1.73995e+07
2	5	44223697	45228780	89928	0.0894731186647086	0.408805031446541	5.05455e+07	0.288801571709234	3.23256e+07	0.198795180722892	5.97047e+06	0.21978021978022	1.59617e+07	0.0208768267223382	237100	0.179435483870968	1.41117e+07	0.0625	2.07205e+07	0.0856610800744879	5.32985e+07	0.325581395348837	9.42373e+06	0.0296912114014252	4.1596e+06	0.208436724565757	3.29211e+07	0.050314465408805	0	0.0209643605870021	4.84532e+06	0.226519337016575	4e+06	0.220779220779221	3.70667e+07	0	0	0.0719424460431655	0	0.339055793991416	1.54445e+07	0.23943661971831	4.1648e+06	0.277456647398844	0	0.147126436781609	3.84554e+07	0.339285714285714	0
1	5	45228781	46233864	434173	0.43197682979731	0.134171907756813	6.37063e+06	0.174852652259332	4.18233e+07	0.145582329317269	4.10767e+06	0.102564102564103	2.12013e+07	0.0187891440501044	980098	0.0625	1.72742e+07	0.0454545454545455	8.58346e+06	0.0614525139664804	1.8055e+07	0.211886304909561	4.2811e+06	0.0285035629453682	6.56435e+06	0.106699751861042	2.08752e+06	0.0440251572327044	1.54579e+06	0.010482180293501	551972	0.223756906077348	825530	0.194805194805195	371489	0	0	0.0683453237410072	1.82073e+06	0.248927038626609	5.58359e+06	0.202816901408451	4.95318e+06	0.104046242774566	3.24158e+07	0.0666666666666667	2.19355e+07	0.178571428571429	5.61763e+06
2	5	49249117	50254200	216852	0.21575510106618	0.109014675052411	2.49881e+07	0.174852652259332	1.39318e+07	0.135542168674699	7.23621e+06	0.0879120879120879	4.4555e+06	0.0187891440501044	981157	0.0665322580645161	1.7684e+07	0.0397727272727273	8.86815e+06	0.0595903165735568	3.89551e+07	0.209302325581395	4.77869e+06	0.0285035629453682	9.18842e+06	0.109181141439206	2.67072e+07	0.050314465408805	0	0.0125786163522013	4.25018e+06	0.223756906077348	3.31758e+06	0.194805194805195	0	0	0	0.0683453237410072	3.67445e+06	0.261802575107296	1.52697e+07	0.205633802816901	1.02476e+07	0.092485549132948	5.06752e+06	0.0666666666666667	2.40474e+07	0.160714285714286	1.44108e+06
2	5	51259285	52264368	165540	0.164702651718662	0.0566037735849057	3.0356e+06	0.137524557956778	1.77672e+07	0.129518072289157	1.0521e+07	0.0659340659340659	3.83077e+07	0.0167014613778706	2.56511e+06	0.0443548387096774	1.06917e+07	0.0340909090909091	2.71063e+07	0.0633147113594041	4.88289e+07	0.165374677002584	1.34991e+07	0.0273159144893112	4.51933e+06	0.0669975186104218	1.83056e+07	0.050314465408805	0	0.010482180293501	8.56856e+06	0.220994475138122	8.6607e+06	0.181818181818182	0	0	0	0.0647482014388489	7.19147e+06	0.248927038626609	4.00055e+06	0.183098591549296	1.76375e+07	0.046242774566474	132766	0.0459770114942529	3.20919e+06	0.107142857142857	3.77552e+07
5	5	52264369	53269452	324568	0.322926242980686	0.0461215932914046	1.6047e+07	0.135559921414538	209037	0.126506024096386	3.17164e+06	0.0622710622710623	2.12484e+07	0.0167014613778706	1.30829e+06	0.0463709677419355	1.01168e+07	0.0340909090909091	7.90005e+06	0.0540037243947858	4.13655e+07	0.157622739018088	5.63601e+06	0.0273159144893112	9.96349e+06	0.0595533498759305	3.1049e+07	0.050314465408805	0	0.00838574423480084	4.44378e+06	0.220994475138122	3.31292e+06	0.168831168831169	0	0	0	0.0575539568345324	6.08897e+06	0.248927038626609	2.04041e+06	0.185915492957746	1.58582e+07	0.046242774566474	1.69287e+07	0.0436781609195402	2.42218e+07	0.0892857142857143	1.92564e+07
3	5	53269453	54274536	339196	0.337480250406931	0.0335429769392034	7.59832e+06	0.12770137524558	9.62303e+06	0.1285140562249	351493	0.0622710622710623	867102	0.0167014613778706	0	0.0423387096774194	6.19731e+06	0.0340909090909091	5.66952e+06	0.0502793296089385	3.35952e+07	0.134366925064599	188984	0.0273159144893112	4.04359e+06	0.0521091811414392	1.59977e+07	0.050314465408805	0	0.00838574423480084	1.43812e+06	0.220994475138122	4.24194e+06	0.168831168831169	0	0	0	0.0683453237410072	2.34912e+06	0.253218884120172	0	0.183098591549296	325163	0.0404624277456647	1.2818e+07	0.0390804597701149	1.84259e+07	0.0892857142857143	9.51015e+06
11	5	54274537	55279620	389123	0.387154705477353	0.0314465408805031	4.21515e+07	0.121807465618861	5.54435e+07	0.120481927710843	2.21805e+07	0.0586080586080586	5.1904e+07	0.0167014613778706	2.72811e+06	0.0443548387096774	3.34863e+07	0.0340909090909091	3.81337e+07	0.0465549348230912	1.29999e+08	0.116279069767442	2.18356e+07	0.0285035629453682	1.96199e+07	0.0521091811414392	6.90719e+07	0.050314465408805	535392	0.00419287211740042	1.42412e+07	0.220994475138122	1.75639e+07	0.168831168831169	1.71325e+07	0	0	0.0683453237410072	1.64472e+06	0.244635193133047	1.19928e+07	0.185915492957746	4.23607e+06	0.0346820809248555	3.14097e+07	0.032183908045977	7.14748e+07	0.0892857142857143	8.86166e+07
4	5	55279621	56284704	247070	0.245820249849764	0.0272536687631027	2.61125e+07	0.111984282907662	2.37386e+07	0.114457831325301	6.68495e+07	0.0512820512820513	4.20773e+07	0.0167014613778706	1.71866e+06	0.0423387096774194	1.24154e+07	0.0340909090909091	1.56675e+07	0.0391061452513966	6.82472e+07	0.0956072351421189	1.06511e+07	0.0285035629453682	1.36601e+07	0.0347394540942928	4.40648e+06	0.050314465408805	2.81072e+06	0.00628930817610063	7.11861e+06	0.218232044198895	7.27956e+06	0.168831168831169	0	0	0	0.0647482014388489	1.77378e+07	0.248927038626609	1.08656e+07	0.174647887323944	1.61311e+07	0.0289017341040462	2.24858e+09	0.0367816091954023	5.43106e+07	0.0892857142857143	1.44551e+07
2	5	56284705	57289788	49753	0.0495013352117833	0.0251572327044025	8.64486e+07	0.104125736738703	4.13809e+07	0.113453815261044	1.80263e+06	0.0512820512820513	7.9209e+07	0.0167014613778706	4.26737e+06	0.0403225806451613	3.69926e+07	0.0340909090909091	2.59346e+07	0.037243947858473	1.46262e+07	0.10077519379845	4.30699e+07	0.0273159144893112	2.75676e+07	0.0397022332506203	4.08522e+07	0.050314465408805	0	0.00838574423480084	2.52504e+07	0.220994475138122	2.90242e+07	0.155844155844156	0	0	0	0.0683453237410072	2.41191e+07	0.244635193133047	2.71612e+07	0.177464788732394	1.47248e+07	0.0289017341040462	446651	0.0298850574712644	1.40823e+08	0.0892857142857143	7.44418e+07
4	5	57289789	58294872	298377	0.296867724488699	0.0314465408805031	1.86192e+07	0.0982318271119843	2.20239e+07	0.115461847389558	1.14367e+07	0.0476190476190476	2.45229e+07	0.0167014613778706	4.26938e+06	0.0362903225806452	1.11043e+07	0.0340909090909091	1.08112e+07	0.037243947858473	4.25833e+07	0.0956072351421189	7.08056e+06	0.0273159144893112	5.85044e+06	0.0421836228287841	1.36794e+07	0.050314465408805	232741	0.0125786163522013	4.15814e+06	0.220994475138122	1.20556e+06	0.155844155844156	0	0	0	0.0683453237410072	1.33524e+06	0.248927038626609	6.70293e+06	0.180281690140845	1.73138e+07	0.0289017341040462	1.05836e+07	0.0298850574712644	3.35146e+07	0.0892857142857143	0
1	5	58294873	59299956	894576	0.890050980813544	0.0272536687631027	2.29302e+06	0.0923379174852652	1.64874e+06	0.113453815261044	332199	0.0512820512820513	1.10133e+06	0.0167014613778706	237335	0.032258064516129	1.3674e+06	0.0340909090909091	1.44238e+06	0.0335195530726257	2.89325e+06	0.0956072351421189	798463	0.0273159144893112	1.53321e+06	0.032258064516129	1.35771e+06	0.050314465408805	0	0	549311	0.220994475138122	403555	0.155844155844156	0	0	0	0.0647482014388489	1.3468e+06	0.244635193133047	0	0.169014084507042	3.25192e+06	0.0289017341040462	3.72616e+06	0.0252873563218391	3.48239e+06	0.0892857142857143	0
4	5	59299957	60305040	269468	0.268104954411771	0.0230607966457023	1.79565e+07	0.0943025540275049	1.1936e+07	0.110441767068273	3.8714e+06	0.0512820512820513	2.1937e+07	0.0167014613778706	787901	0.032258064516129	1.12455e+07	0.0340909090909091	1.1971e+07	0.037243947858473	3.14345e+07	0.0981912144702842	8.83575e+06	0.0273159144893112	555264	0.0297766749379653	2.46374e+07	0.050314465408805	5.15419e+06	0.00628930817610063	2.74213e+06	0.223756906077348	4.03371e+06	0.142857142857143	0	0	0	0.0647482014388489	2.96881e+06	0.231759656652361	7.42203e+06	0.169014084507042	1.21895e+07	0.0346820809248555	1.34133e+07	0.0275862068965517	2.83645e+07	0.0892857142857143	1.48441e+07
2	5	60305041	61310124	355786	0.353986333480585	0.0251572327044025	7.59643e+06	0.0962671905697446	829109	0.108433734939759	4.6353e+06	0.0512820512820513	9.59744e+06	0.0167014613778706	0	0.030241935483871	851721	0.0340909090909091	18133.4	0.0391061452513966	2.04533e+07	0.082687338501292	0	0.0285035629453682	351335	0.0272952853598015	2.32287e+06	0.050314465408805	0	0.00209643605870021	0	0.223756906077348	3.05509e+06	0.142857142857143	0	0	0	0.0683453237410072	5.64393e+06	0.227467811158798	1.84913e+06	0.169014084507042	7.15445e+06	0.0346820809248555	1.00381e+07	0.0275862068965517	44899	0.107142857142857	0
4	5	61310125	62315208	285768	0.284322504387693	0.0188679245283019	2.64815e+07	0.0884086444007859	6.17531e+06	0.103413654618474	1.04302e+07	0.0476190476190476	2.86004e+07	0.0167014613778706	2.22888e+06	0.0282258064516129	7.40042e+06	0.0340909090909091	2.28715e+06	0.0353817504655493	4.60007e+07	0.0775193798449612	0	0.0285035629453682	5.68643e+06	0.0272952853598015	1.43416e+07	0.050314465408805	0	0.00209643605870021	1.71117e+06	0.218232044198895	631650	0.12987012987013	5.6441e+06	0	0	0.0647482014388489	2.79947e+08	0.227467811158798	0	0.171830985915493	1.14524e+07	0.0346820809248555	4.21607e+06	0.0252873563218391	289754	0.107142857142857	0
4	5	63320293	64325376	412550	0.410463205065447	0.00838574423480084	9.12239e+06	0.0766208251473477	1.06314e+07	0.104417670682731	3.99153e+06	0.0512820512820513	1.54467e+07	0.0167014613778706	514639	0.0262096774193548	8.78773e+06	0.0340909090909091	6.33712e+06	0.0335195530726257	3.47091e+07	0.0723514211886305	3.87832e+06	0.0261282660332542	2.71675e+06	0.0248138957816377	1.39079e+07	0.050314465408805	0	0.00209643605870021	177796	0.215469613259669	3.50029e+06	0.12987012987013	3.97369e+06	0	0	0.0683453237410072	290874	0.244635193133047	0	0.166197183098592	525043	0.023121387283237	8.55511e+06	0.0298850574712644	1.7587e+07	0.0892857142857143	0
6	5	64325377	65330460	566253	0.563388731688098	0.0146750524109015	2.44233e+07	0.0766208251473477	146295	0.102409638554217	7.63247e+06	0.0512820512820513	2.79762e+07	0.0167014613778706	1.12484e+06	0.0282258064516129	7.46947e+06	0.0340909090909091	9.23396e+06	0.0335195530726257	4.29908e+07	0.0749354005167959	7.48303e+06	0.0273159144893112	4.63574e+06	0.0272952853598015	1.54525e+06	0.050314465408805	0	0.00209643605870021	2.18024e+06	0.215469613259669	8.28806e+06	0.12987012987013	0	0	5.3515e+06	0.0647482014388489	7.03584e+06	0.236051502145923	3.57972e+06	0.16056338028169	6.32973e+06	0.0173410404624277	1.47166e+07	0.0275862068965517	3.35028e+07	0.125	2.11919e+07
2	5	65330461	66335544	409428	0.407356997027114	0.010482180293501	1.32023e+07	0.0766208251473477	6.52282e+06	0.103413654618474	6.22509e+06	0.0549450549450549	2.40634e+07	0.0167014613778706	0	0.0262096774193548	5.13424e+06	0.0340909090909091	1.11745e+07	0.031657355679702	2.40143e+07	0.0645994832041344	4.1751e+06	0.0273159144893112	3.9889e+06	0.0248138957816377	7.12376e+06	0.050314465408805	0	0.00209643605870021	2.40634e+06	0.220994475138122	530963	0.12987012987013	0	0	0	0.0647482014388489	3.90789e+06	0.227467811158798	4.91765e+06	0.16056338028169	353976	0.0173410404624277	1.76561e+07	0.0183908045977011	1.89092e+07	0.0892857142857143	0
1	5	67340629	68345712	70926	0.0705672361713051	0.00838574423480084	3.87341e+07	0.0726915520628684	2.8858e+06	0.0993975903614458	5.66486e+07	0.0586080586080586	1.11127e+08	0.0167014613778706	5.98692e+06	0.0201612903225806	3.3974e+06	0.0340909090909091	9.27579e+06	0.031657355679702	1.3218e+08	0.041343669250646	1.28175e+07	0.0285035629453682	9.93151e+07	0.0272952853598015	3.55442e+07	0.0566037735849057	0	0	3.4899e+06	0.220994475138122	1.0254e+07	0.12987012987013	0	0	0	0.0647482014388489	2.25587e+07	0.223175965665236	2.76455e+06	0.157746478873239	2.05828e+07	0.0173410404624277	6.7948e+07	0.0183908045977011	7.27701e+07	0.0892857142857143	3.79594e+08
[truncated: 1,204 more rows]
[truncated: 4 more columns]

## Sheet: 36Mbp
#genes	chromosome	start	end	coding length	% coding	LUAD.cna_freq_ampl	LUAD.mutations_norm	BRCAcna_freq_ampl	BRCA.mutations_norm	LUSC.cna_freq_ampl	LUSC.mutations_norm	CESC.cna_freq_ampl	CESC.mutations_norm	THCA.cna_freq_ampl	THCA.mutations_norm	HNSC.cna_freq_ampl	HNSC.mutations_norm	COADREAD.cna_freq_ampl	COADREAD.mutations_norm	PAAD.cna_freq_ampl	PAAD.mutations_norm	GBMLGG.cna_freq_ampl	GBMLGG.mutations_norm	OV.cna_freq_ampl	OV.mutations_norm	BLCA.cna_freq_ampl	BLCA.mutations_norm	PCPG.cna_freq_ampl	PCPG.mutations_norm	KIRC.cna_freq_ampl	KIRC.mutations_norm	PRAD.cna_freq_ampl	PRAD.mutations_norm	MESO.cna_freq_ampl	MESO.mutations_norm	TGCT.cna_freq_ampl	TGCT.mutations_norm	KIRP.cna_freq_ampl	KIRP.mutations_norm	SARC.cna_freq_ampl	SARC.mutations_norm	ESCA.cna_freq_ampl	ESCA.mutations_norm	LIHC.cna_freq_ampl	LIHC.mutations_norm	STAD.cna_freq_ampl	STAD.mutations_norm	SKCM.cna_freq_ampl	SKCM.mutations_norm
[truncated: 78 more rows]
[truncated: 4 more columns]

[truncated: 1 more sheets: armLevel]
