# Supplementary material for: Cancer genomes tolerate deleterious coding mutations through somatic copy number amplifications of wild-type regions
Source: Nat Commun. 2023 Jun 16;14:3594. doi: 10.1038/s41467-023-39313-8 (PMC10276008; doi:10.1038/s41467-023-39313-8)
Supplement: Supplementary file 6 — Supplementary Dataset 3 [file 41467_2023_39313_MOESM6_ESM.xlsx]

## Sheet: pancancer_protected
Gene	Mean Pi score	Distribution percentile (with permutations)
AAMDC	0.15800800635659	0.056019398060194
AANAT	0.241055924164343	0.0447288604472886
AARD	0.233778667013646	0.137986201379862
ABHD13	0.059818357269568	0.167533246675332
ABI3	0.119426420833581	0.0606272706062727
ACBD6	0.139368117837229	0.0354564543545645
ACBD7	0.0784732423675409	0.185081491850815
ACOT13	0.0716207931998778	0.200613272006133
ACTN4	0.0083112449595707	0.178315501783155
ACTRT3	0.488021736001207	0.0290304302903043
ADAP1	0.245361275671061	0.0293970602939706
ADCY2	0.223122260819465	0.0603189681031897
ADCYAP1	0.0810341999918865	0.191547511915475
AEBP2	0.0877707180605759	0.0654601206546011
AGAP9	0.037262189160471	0.172582741725827
AGXT2	0.169512931090567	0.0764923507649237
AIF1L	0.0954616045109236	0.128447155284472
AK1	0.122217365705734	0.146385361463854
AKR1C3	0.0479813517325031	0.263973602639736
ALYREF	0.154806325570926	0.0612605406126054
AMN1	0.170334230055171	0.0486284704862847
AMZ2	0.101563933412785	0.0902659734026597
ANAPC11	0.163426453053365	0.0622604406226044
ANAPC13	0.101379212040232	0.0765423457654234
ANAPC16	0.0377125072233085	0.207419258074192
ANGPT1	0.312060794551529	0.113713628637136
ANKH	0.213878289102019	0.0469119754691198
ANKRD29	0.0752544890599035	0.152364763523648
ANKRD33B	0.276908076340088	0.0444288904442889
ANKRD34C	0.0563661154531502	0.207399260073993
ANKRD39	0.0821338958277202	0.199913341999133
ANKRD45	0.201938850813977	0.0192980701929807
ANKRD46	0.301829130954004	0.111713828617138
ANKRD54	0.0606560008829624	0.274439222744392
ANKRD9	0.0799015786766891	0.139266073392661
ANP32E	0.414756100467067	0.00549945005499452
ANXA13	0.272218451865547	0.139752691397527
ANXA2R	0.272250799534171	0.0575142485751424
ANXA8	0.042441200885236	0.175365796753658
ANXA8L1	0.0331140485188652	0.195130486951305
AP1S3	0.0154716087258999	0.272172782721728
AP2S1	0.0999140084612699	0.113808619138086
AP3S2	0.0481189436421128	0.22989701029897
APIP	0.0824348055074888	0.149385061493851
APOA2	0.294446049464521	0.0153184681531847
APOBEC4	0.241697429691842	0.0200579942005799
APOC2	0.108760181388715	0.106539346065393
APOD	0.494714173684557	0.0350764923507649
APOE	0.126622284649783	0.108014198580142
APOLD1	0.136835731232463	0.0822167783221677
APOM	0.0715359366030462	0.187506249375062
ARHGAP23	0.0953914323629924	0.0890510948905109
ARHGEF33	0.13419108247312	0.0751924807519248
ARL14	0.469084931733098	0.0384361563843615
ARL16	0.0705878157261795	0.0605606106056061
ARL2	0.0888316856972062	0.104509549045096
ARL5C	0.106185367565547	0.0841915808419158
ARPC5	0.202113208377334	0.0210778922107789
ASB16	0.0715866598675195	0.0788921107889211
ASB7	0.0527353887677774	0.305502783055028
ATAT1	0.117271131461396	0.176515681765157
ATF6	0.112603024921251	0.045895410458954
ATOH7	0.0382761252191985	0.222177782221778
ATOH8	0.0790243856639113	0.0901659834016598
ATP6V0C	0.208008130406418	0.04999500049995
ATP6V1E1	0.0916057130061336	0.154059594040596
ATP6V1F	0.210631415639302	0.0555194480551946
ATP6V1G1	0.151646047771171	0.0688931106889312
ATXN10	-0.0307327002326457	0.334566543345666
ATXN7L3B	0.097689766215134	0.092040795920408
AZIN1	0.226408861692826	0.155551111555511
B4GALT3	0.257417450575583	0.00353298003532979
BAALC	0.240280270800802	0.121687831216878
BANF1	0.13297566090554	0.0766173382661735
BASP1	0.31128519501481	0.0454454554544545
BBIP1	0.0214990287148624	0.192580741925807
BCL2A1	0.0652520642398813	0.268439822684398
BGLAP	0.298856425650976	0.0205179482051795
BHLHA15	0.189743674553082	0.038976102389761
BLCAP	0.252944712844928	0.0259640702596407
BLOC1S1	0.100060490599622	0.0756257707562577
BLOC1S3	0.130082512754267	0.103214678532147
BLOC1S4	0.0339675020500058	0.2003199680032
BLOC1S5	0.0957281055063018	0.137986201379862
BLVRB	0.097309061715265	0.130653601306536
BNIP3	0.031223737515569	0.217344932173449
BNIPL	0.311676225820963	0.0181981801819818
BOD1	0.0762029628372688	0.102823051028231
BOLA2B	0.145820185398173	0.0702596407025965
BOLA3	0.0925642967226044	0.0914575209145751
BRI3	0.129829181840602	0.0391960803919608
BRIX1	0.191729990157069	0.0751591507515914
BRK1	0.0318934458759244	0.177332266773323
BSPH1	-0.00260147100582774	0.168183181681832
BTBD18	0.0987900372510071	0.0843582308435822
BTG2	0.36615586547318	0.0261973802619738
BUD31	0.173368886764104	0.0364963503649635
BYSL	0.030910468684793	0.259140752591408
C10orf105	0.0432512545509196	0.193500649935006
C10orf67	0.0749335191187257	0.149601706496017
C10orf95	0.0128399932426594	0.213203679632037
C11orf52	0.0697197974235292	0.163283671632837
C11orf68	0.10280706397339	0.0871912808719128
C11orf86	0.134258609621876	0.0675532446755325
C11orf91	0.0783721627744814	0.129047095290471
C11orf94	0.0990680441488498	0.0991234209912343
C12orf54	0.0862781977697787	0.114688531146885
C14orf119	0.072298287899656	0.0871579508715796
C14orf180	0.0825111108849707	0.135926407359264
C15orf61	0.0460673010677768	0.214618538146185
C16orf90	0.171730786526261	0.135986401359864
C16orf95	0.0899765487893896	0.148751791487518
C16orf96	0.0899599501370254	0.137986201379862
C17orf58	0.123202810399219	0.0857414258574143
C17orf64	0.100772339754791	0.0632270106322701
C17orf98	0.0703641671795788	0.109064093590641
C17orf99	0.145052366308731	0.0474352564743526
C18orf32	0.0526322128946821	0.218378162183782
C18orf63	0.0743883066570374	0.124220911242209
C19orf33	0.137121178270444	0.0855514448555144
C19orf53	0.0613972855287166	0.111222211112222
C19orf73	0.0451003564937243	0.151084891510849
C19orf81	0.107972184144434	0.102518319596612
C1D	0.1234035930457	0.0811585508115856
C1orf115	0.380139439859323	0.0243642302436423
C1orf189	0.307723878781969	0.0220477952204779
C1orf21	0.249468634488118	0.0162983701629837
C1orf226	0.183151603800525	0.0201479852014798
C1orf53	0.336192824198025	0.0272372762723728
C1orf54	0.309049381639969	0.0217978202179782
C1orf68	0.275758771516964	0.025997400259974
C1QL3	0.0794886764007539	0.185781421857814
C1QTNF3	0.160888651055529	0.0753924607539247
C20orf173	0.237327617461003	0.0253724627537246
C20orf202	0.180786262850484	0.0646268706462687
C20orf85	0.297239845753562	0.0279305402793054
C22orf15	0.0380761086198306	0.292470752924707
C2CD4B	0.0430176170043352	0.234601539846015
C2CD4D	0.277929642490019	0.0232376762323767
C2orf66	0.0455174720963581	0.216878312168783
C2orf72	0.0352304597507499	0.231851814818518
C2orf73	0.112339431437529	0.0936573009365731
C2orf88	0.0599259870848542	0.190655934406559
C3orf33	0.463896121487591	0.0162650401626504
C3orf70	0.165554074027949	0.0825167483251676
C3orf80	0.359876750902051	0.0372819860871056
C4orf45	-0.0448911750588633	0.171916141719161
C4orf48	0.0445976986511249	0.16699758595569
C5orf22	0.214530361517576	0.0500149985001499
C5orf38	0.254687625664634	0.0385561443855614
C5orf47	0.0765766549149968	0.104556211045562
C5orf49	0.32275046155937	0.0201229877012299
C6orf132	0.10626870047765	0.134361563843616
C6orf141	0.0925956644917343	0.145825417458254
C6orf226	0.0968424622237232	0.154284571542846
C6orf47	0.0896056712463059	0.200446622004466
C6orf52	0.121943192277069	0.120345108346308
C7orf61	0.12901520415058	0.051661500516615
C8orf37	0.228611378837913	0.126112388761124
C8orf76	0.175779468662195	0.147251941472519
CA2	0.15602049797108	0.160250641602506
CAB39	0.0402426482045201	0.268273172682732
CABLES1	0.0942478424257916	0.17644902176449
CABP7	0.0376828638951256	0.246325367463254
CACFD1	0.0422183114265184	0.181215211812152
CACNG1	0.149231232481429	0.0843165683431656
CACNG4	0.0891162944181161	0.0903659634036595
CALM2	0.116155105287481	0.0757257607572577
CALML3	0.0641016990568613	0.222311102223111
CALML4	0.0710412256081523	0.215638436156384
CALML5	0.0399908751442236	0.272622737726227
CALY	0.0313465833551242	0.21975302469753
CAMK1D	0.0240210938024113	0.216911642169116
CAMK2N2	0.483144225140085	0.0192180781921808
CAMKMT	0.120873211871337	0.0756257707562577
CAPN14	0.135201229133854	0.0735676432356765
CASP12	0.0862383379445395	0.075967403259674
CBR3	0.0583599705620828	0.293170682931707
CBY1	0.130744969597719	0.239142752391428
CBY3	0.0744992623654545	0.0931156884311568
CCDC117	0.110123484258538	0.257540912575409
CCDC134	0.0302491575344283	0.378795453787955
CCDC152	0.234393364888404	0.0631561843815618
CCDC166	0.307570537586777	0.0715357035724999
CCDC167	0.0887844244264984	0.156084391560844
CCDC169	0.0203815730968149	0.214345232143452
CCDC175	0.0813913504691601	0.11993800619938
CCDC3	0.0323139569003228	0.292470752924708
CCDC43	0.0728486557951058	0.0823917608239175
CCDC50	0.399836036147714	0.045895410458954
CCDC71L	0.261190855641632	0.0359630703596307
CCDC85B	0.0602777683386259	0.0982401759824017
CCDC85C	0.0847914103332261	0.128672847001014
CCDC91	0.113536126627582	0.079325400793254
CCL20	0.0431008210979082	0.224902509749025
CCL21	0.132094969316057	0.127687231276872
CCL28	0.189158146121645	0.0611738826117388
CCL3L1	0.108453820440075	0.0508949105089491
CCND3	0.0555881031890171	0.144585541445855
CCNE2	0.32944311510148	0.110588941105889
CCNY	-0.0111506700926082	0.231810152318101
CCNYL1	0.0456872570145136	0.257174282571743
CD247	0.190261996450017	0.0329300403293004
CD27	0.122802627895926	0.0662600406626005
CD48	0.216149333120172	0.00876579008765791
CD7	0.157648226806757	0.0557944205579442
CD79B	0.0786446397829233	0.0934239909342398
CD83	0.0925004981307661	0.177615571776156
CD9	0.193233250017074	0.0751591507515915
CDC42EP5	0.119802156220614	0.0780121987801221
CDC42SE1	0.205199638401952	0.0312218778122188
CDCA3	0.22322948852085	0.0501616505016166
CDH12	0.173204677364049	0.0714178582141785
CDH18	0.191220865106537	0.0501749825017498
CDK2AP2	0.0850585206449638	0.147718561477186
CDK3	0.183123831843144	0.0385961403859614
CDKAL1	0.0574736326816771	0.187747891877479
CDNF	0.0433419338496456	0.261773822617738
CDR2L	0.120960550368065	0.0873912608739125
CEBPA	0.118051396435926	0.10983901609839
CEBPG	0.102914442881184	0.130686931306869
CENPM	0.0395836541211148	0.30956904309569
CEP19	0.22873199355711	0.0641185881411857
CEP89	0.015158742577485	0.168383161683832
CERS6	0.0187924303899271	0.207479252074793
CGB5	0.11207074956157	0.134153251341532
CGB7	0.0605673249445303	0.134153251341533
CGB8	0.0801761910100234	0.119654701196547
CHIC2	0.00716045230853673	0.143752291437523
CHMP3	0.0922589726444761	0.0910242309102422
CHMP4B	0.257429383564067	0.0254307902543079
CHN2	0.263082158273474	0.0265973402659734
CHRAC1	0.309219550550246	0.0825750758257507
CIB1	0.0521159361050555	0.256349365063494
CIB4	0.111799402999727	0.0941905809419059
CISD1	0.0276031094139453	0.187331266873313
CISD3	0.0983600929603975	0.0844058451297727
CKS1B	0.265235123741142	0.0185648101856481
CLC	0.10854394450715	0.113488651134887
CLDN1	0.37682095077882	0.0444455554444555
CLDN14	0.0608382853080555	0.293937272939373
CLDN24	0.0238438391953683	0.139046095390461
CLEC2A	0.170685747205403	0.0529947005299469
CLECL1	0.128615378356763	0.0615605106156051
CLIC3	0.0588790294646144	0.19371396193714
CLN6	0.0574045787478375	0.273339332733393
CLPSL1	0.0846240727235249	0.192280771922807
CLPSL2	0.115030554542644	0.15003499650035
CLPTM1L	0.111734593520238	0.0736176382361763
CLTA	0.0892301685225968	0.12635403126354
CLYBL	0.158545113977214	0.169316401693164
CMAS	0.143995026390463	0.0725260807252608
CNFN	0.0604371761068596	0.13988601139886
CNIH2	0.119837955631128	0.0894243908942438
CNPY3	0.0706750681086342	0.265940072659401
COA3	0.0980957441807264	0.06004399560044
COA5	0.0495513794312763	0.191005899410059
COMMD1	0.138097938870765	0.0876912308769124
COMMD2	0.283299977302563	0.0453954604539546
COMMD3	0.0450217949528916	0.194780521947805
COMMD6	0.0783192392667737	0.160703929607039
COMMD9	0.0688614367919205	0.14635203146352
COMTD1	0.0468819451357094	0.254724527547245
COPS8	0.0515232693768736	0.256874312568743
COX14	0.0908104181982111	0.0908742459087424
COX17	0.101951413164162	0.0824584208245842
COX20	0.312486100370489	0.0232976702329767
COX5A	0.0596400248677007	0.273339332733394
COX6A1	0.0707548228609329	0.0919158084191582
COX6B1	0.0816977524642316	0.116871646168716
COX6B2	0.132457836413002	0.0993100689931007
COX6C	0.326717764252241	0.0747496678903539
COX7A1	0.155236407455401	0.0892910708929107
CPO	0.0351573218467723	0.288637802886378
CPSF4	0.132528237171236	0.0395293803952938
CPSF4L	0.162681001182723	0.0633186681331867
CRABP1	0.0385975817312673	0.295037162950372
CRADD	0.0457191151139491	0.119821351198213
CRCT1	0.352416999482703	0.0105989401059894
CREG1	0.228434048559372	0.0240775922407759
CRIP1	0.10842962173205	0.107174996786036
CRIP2	0.127676554110341	0.101639836016398
CRIP3	0.0450306599004266	0.261107222611072
CRYBB2	0.0457351737915353	0.261007232610072
CSDC2	0.0400563120036955	0.351531513515315
CSF3	0.0632288814521854	0.109355731093557
CSNK2B	0.127804056151258	0.168483151684831
CSTB	0.0784108015067676	0.166158384161584
CTHRC1	0.277383004275204	0.147285271472853
CTNND2	0.179305204877688	0.0594140585941406
CTU1	0.0887520848842569	0.113705296137053
CXCL11	0.0749872471545125	0.115513448655134
CXCL17	0.0640070455704782	0.132436756324368
CXCL3	0.0753054384430674	0.115663433656634
CYB5A	0.0122099429489095	0.185056494350565
CYCS	0.241846647622701	0.0516198380161984
CYP51A1	0.19558488911803	0.0658600806586008
CYS1	0.16689031621909	0.0544195580441956
CYTL1	0.03843691257791	0.212358764123588
DAP	0.291804854465488	0.0454811661690973
DCTN3	0.1336936638261	0.120521281205213
DCXR	0.133459463525802	0.0587691230876912
DDAH2	0.103177699965819	0.163833616638336
DDT	0.0470336152136191	0.190697596906976
DDTL	0.0873103106877852	0.203959604039596
DDX5	0.120044212432496	0.0840582608405826
DEDD	0.252858330964919	0.0166583341665833
DEFB108B	0.132967772780878	0.113488651134886
DEFB124	0.299504473710489	0.018948105189481
DENR	0.0557200553870416	0.101356531013565
DEPTOR	0.212434722170372	0.151084891510849
DERL1	0.287083154714764	0.0927707229277072
DESI2	0.187239348167178	0.0398293503982935
DGCR6	0.0579059829059828	0.264506882645069
DLEU7	0.137191278461963	0.17000799920008
DLX2	0.0696187297980098	0.193380661933807
DLX3	0.161827372260672	0.0456287704562877
DNAJB9	0.304408461918829	0.0500283305002832
DNAJC15	0.15966138025311	0.188014531880145
DNAJC19	0.586418316703947	0.0115488451154885
DNAJC21	0.109565727282916	0.0796920307969202
DNAJC9	0.0208948766553316	0.33046695330467
DNAL4	0.102296325138132	0.263640302636403
DNASE1L2	0.0721079776809152	0.0900409959004101
DNLZ	0.0934922343653711	0.164416891644169
DPH3	0.0242788476824561	0.212478752124788
DPM2	0.0636118745496468	0.179948671799487
DPM3	0.279213445425651	0.0240775922407759
DPT	0.175339600272594	0.0358297503582976
DRG1	0.106714688322765	0.258407492584075
DROSHA	0.206266252098493	0.0326300703263007
DSCC1	0.242689771175951	0.0998300169983003
DTD2	0.100626446606973	0.0966236709662367
DTHD1	0.0499138714805725	0.123337666233377
DUSP12	0.279632030095877	0.0140985901409859
DUSP15	0.298239936149286	0.018023197680232
DUSP23	0.21441094762472	0.0157984201579842
EBF4	0.182772950283273	0.0625270806252708
EBPL	0.0244695173163381	0.213145352131454
ECHDC3	0.0449514179503489	0.235296470352965
EDDM3A	0.123855904970857	0.111688831116888
EFCAB2	0.194760749072347	0.0458354164583542
EFCAB9	0.0794724943169789	0.0888577808885778
EFNA3	0.422640239252693	0.00389961003899612
EFNA4	0.279615610372801	0.0207645902076459
EFR3B	0.131170666316336	0.0777422257774223
EID2	0.107232908134455	0.130120321301203
EID2B	0.169815375087442	0.0887311268873113
EIF1	0.0589106375557941	0.0877245608772457
EIF3CL	0.167690760284113	0.0982568409825684
EIF3H	0.315885286116345	0.101989801019898
EIF3K	0.0783823427885785	0.128387161283872
EIF4EBP2	0.0223164596675024	0.227652234776522
EIF5A2	0.397782489110982	0.0462353764623537
EIF5AL1	0.0331917048992918	0.244735526447355
EIF6	0.434072048205318	0.0141985801419859
ELAC1	0.0399081826441234	0.199013431990134
ELF5	0.0806410583190049	0.154084591540846
ELOVL2	0.113558913549929	0.181615171816152
ELOVL3	0.0227109696473197	0.340665933406659
EML6	0.128659331642704	0.0733926607339267
ENAH	0.231301913977817	0.0540612605406126
ENDOG	0.0868249670515367	0.142860713928607
ENHO	0.082461698404696	0.145352131453522
ENSA	0.279051216832473	0.0201979802019798
ENTPD2	0.087805909219755	0.160950571609506
ENY2	0.335007999054035	0.145718761457188
EPO	0.176448369792549	0.0524447555244476
ERC1	0.129228125082478	0.07665900076659
ERVFRD-1	0.0699344611062519	0.195613771956138
ETFA	0.0366925728804096	0.227257274272573
ETV4	0.12034293296674	0.0564610205646102
EXOSC6	0.0957902987073166	0.0875245808752459
EXOSC8	0.0153485697964849	0.220777922207779
F11R	0.32795892126502	0.002999700029997
FABP12	0.156769561641492	0.158750791587508
FADD	0.128693298920998	0.144885511448855
FADS6	0.127267706004809	0.0828917108289171
FAHD1	0.0847097285403199	0.137886211378862
FAM104A	0.0937596839429421	0.0858414158584143
FAM107B	-0.0150391222477059	0.331333533313335
FAM149B1	0.0362401095137982	0.246575342465753
FAM155A	0.170846855598311	0.0980568609805686
FAM163A	0.279818905229421	0.0132486751324867
FAM163B	0.120678158214572	0.127562243775622
FAM166A	0.0894576078468667	0.162717061627171
FAM170B	0.0325506432039075	0.190600939906009
FAM171A2	0.0995233282339729	0.0667183281671833
FAM174B	0.048331455584288	0.203236819175225
FAM177A1	0.0611037967254936	0.104389561043895
FAM178B	0.0671199736977254	0.176942305769423
FAM184B	0.0479170731932971	0.125637436256374
FAM185A	0.189818092269057	0.0311302203113022
FAM200A	0.191571160772259	0.0319368063193681
FAM200B	0.047860059064918	0.124337566243376
FAM205A	0.1143850789324	0.126787321267873
FAM219B	0.0245406824146982	0.27643902276439
FAM24B	0.0333846084292479	0.215528447155284
FAM25A	0.0169578302129898	0.202219778022198
FAM25C	0.042226114930964	0.138461153884611
FAM32A	0.0933166163389983	0.0899160083991601
FAM43A	0.469717482124895	0.0451954804519547
FAM47E	0.0787129701233783	0.103656301036563
FAM53A	0.0394839416831254	0.272272772722728
FAM72A	0.172041904560885	0.0551944805519449
FAM89A	0.359573053903029	0.0342715728427158
FAM89B	0.0988964331835551	0.109389061093891
FAM8A1	0.126685075279477	0.176915641769156
FARS2	0.058324870614788	0.172432756724328
FBRSL1	0.0524197253540383	0.104156251041562
FBXL22	0.0300635402609087	0.28693797286938
FBXL7	0.252940296133143	0.0422757724227577
FBXO17	0.142209745626163	0.103739626037396
FBXO36	0.0326953700509736	0.249541712495417
FCER1G	0.284724577791089	0.0177982201779822
FCGR3A	0.127684728232717	0.0194313901943139
FCRLB	0.26423438709271	0.0148735126487351
FDX1	0.0344437978364397	0.167533246675332
FEV	0.0257280717468744	0.273739292737393
FFAR1	0.103877834017986	0.126520681265207
FFAR2	0.104251526095714	0.126287371262874
FGF10	0.222636516971913	0.0504282905042829
FGF12	0.0861824589824767	0.091865813418658
FGF14	0.0239072789189769	0.217478252174782
FGF19	0.125876370840716	0.134061593840616
FIS1	0.187854124029558	0.0396210378962104
FKBP11	0.0898858873962673	0.104489551044896
FKBP14	0.247278478726823	0.0403626304036263
FOLR2	0.112710155861575	0.134436556344365
FOXJ1	0.188901363292062	0.0358297503582975
FRAT2	0.0081701231431231	0.21311202213112
FREM3	0.0373283088203352	0.143918941439189
FUOM	0.0367648800692518	0.209329067093291
FUT7	0.0944156650581101	0.141025897410259
FXYD1	0.135862541815787	0.109355731093557
FXYD4	0.0563924739183459	0.111028897110289
FXYD7	0.0763237640589569	0.127037296270373
G0S2	0.444181266158995	0.0144318901443189
GABARAPL1	0.19799616071622	0.070326300703263
GALR3	0.0373281630574413	0.262473752624737
GATA6	0.119184798301994	0.168816451688165
GATAD1	0.22288776397826	0.048095190480952
GCGR	0.138822285930261	0.0493450654934506
GCSH	0.0843502910665538	0.142135786421358
GDF11	0.0837717651411012	0.0973902609739025
GDNF	0.120846831213372	0.088657800886578
GFER	0.169314641434959	0.0727427257274274
GGACT	0.0672505624908152	0.147699515762709
GH1	0.100626046361532	0.0926240709262405
GHR	0.120132851364407	0.0786254707862548
GHRL	0.0285761524129291	0.208879112088791
GLIPR2	0.132772042416399	0.11312202113122
GLRX2	0.274899199593616	0.0185314801853148
GLRX5	0.0871663712259976	0.138869446388694
GLYATL3	0.0925956644917343	0.147585241475852
GMNC	0.411257608488212	0.0373462653734627
GNB4	0.524938157428487	0.0161983801619838
GNG11	0.103038140601626	0.0724927507249274
GNG3	0.087071004764796	0.115813418658134
GNG4	0.301934143732995	0.0322301103223011
GNG8	0.117217721619104	0.110738926107389
GNGT2	0.128723786620832	0.0646435356464354
GNMT	0.0378630119151846	0.232801719828017
GNPNAT1	0.119183460493552	0.0609605706096058
GOLGA6A	0.0831596845983297	0.277438922774389
GOLGA6L10	0.076119548338855	0.161296370362964
GOLGA6L9	0.0751856916474974	0.164171082891711
GOLGA8B	0.0234121797528345	0.280338632803386
GOLPH3	0.307385055362021	0.0496617004966169
GOLPH3L	0.270998681890066	0.0324967503249674
GOLT1A	0.377064743306094	0.0212645402126454
GOLT1B	0.117253202573761	0.0800669933006699
GPIHBP1	0.262867994360836	0.101164883511649
GPR160	0.424250352965434	0.128662133786621
GPR19	0.183556580382499	0.0689181081891812
GPR20	0.306723789423505	0.11033896610339
GPSM3	0.0609243199651103	0.209379062093791
GRB2	0.100785288645092	0.0843629922722012
GREB1L	0.0858960797245875	0.128207179282072
GRID2IP	0.31890115847094	0.016331700163317
GRPEL1	0.0364642883891863	0.202819718028197
GSC	0.0794230527845903	0.141919141419191
GSKIP	0.085232811664957	0.143005699430057
GSTA3	0.0686751623139191	0.196347031963471
GSTT2	0.120952398704339	0.218853114688531
GSTT2B	0.109261918963471	0.193620637936206
GTF3A	0.033109805861305	0.191460853914608
GUCA1B	0.076317423448483	0.231343532313436
HAMP	0.0873748656622915	0.120721261207212
HAPLN2	0.401974216571359	0.00627437256274373
HCRT	0.0621747043394885	0.0729260407292604
HCST	0.205090505612623	0.0490284304902843
HDDC3	0.0490889066230666	0.261573842615738
HEBP1	0.187898077042785	0.0726594007265941
HES1	0.386265458369942	0.0613605306136054
HIGD1B	0.0853222750020666	0.0611605506116055
HIGD1C	0.0641629687089266	0.10984901509849
HILPDA	0.282869655840689	0.0292220777922208
HINT2	0.0909398097782025	0.128020531280205
HLA-DMA	0.0724226034204362	0.27027297270273
HLA-DOA	0.0774611951153032	0.260507282605073
HLA-DOB	0.136492055566358	0.14998500149985
HLA-DPA1	0.0942790445505275	0.191140885911409
HLA-DPB1	0.0954496385044122	0.160317301603173
HLA-DQB2	0.0833849153505386	0.188547811885478
HLA-DRB1	0.0628997177066263	0.183181681831817
HLA-DRB5	0.144488432692055	0.066993300669933
HLCS	-0.033199656044034	0.234509882345099
HMGA1	0.0852853915907411	0.192700729927007
HMGCS1	0.188257767934847	0.0736259707362597
HMGN4	0.120775500051272	0.154059594040596
HMOX2	0.128524403701341	0.13008699130087
HMX1	0.0396229186152536	0.163297955918694
HORMAD2	0.00342146960083633	0.288937772889378
HRCT1	0.151931832518675	0.0879578708795787
HRK	0.0708395643567361	0.0918408159184082
HS3ST6	0.193599380811407	0.0511948805119488
HS6ST3	0.149336395619263	0.167058294170583
HSBP1	0.079085746561087	0.0881411858814117
HSD11B1	0.271393398024319	0.0547945205479452
HSD17B7	0.154919156750467	0.0465153484651534
HSD17B8	0.121011425173531	0.15003499650035
HSF2BP	-0.0465266165726196	0.266406692664067
HSPA1A	0.100176694379611	0.161633836616338
HSPB6	0.161884395039166	0.0769589707695897
HSPB9	0.0580840214369332	0.0856914308569144
IAH1	0.137087642137278	0.0813252008132521
ICAM2	0.144069498929756	0.0896243708962438
ID4	0.117409218402863	0.126104056261041
IDH2	0.0613076127046462	0.313768623137686
IER3	0.113039276107072	0.137106289371063
IER3IP1	0.0617520413438314	0.173782621737826
IER5	0.179208293897099	0.0192980701929807
IER5L	0.0654126584202728	0.159017431590174
IFI27	0.061601445236443	0.145852081458521
IFI27L1	0.0712316103200065	0.158264173582642
IFI27L2	0.103862672591005	0.113928607139286
IFNG	0.0918554861582041	0.09675699096757
IGFBP7	0.0150289315081178	0.150859914008599
IGFL2	0.0585616293002105	0.139086091390861
IGSF23	0.0943304072686362	0.107455921074559
IL10	0.438407237119474	0.0146985301469853
IL11	0.0960040851325209	0.125287471252875
IL15RA	0.058517362484064	0.214411892144119
IL17D	0.170064014100355	0.119538046195381
IL18BP	0.101046654805624	0.147451921474519
IL1F10	0.0601619629752408	0.185881411858814
IL20	0.383497630014007	0.0238976102389761
IL23A	0.102520132245761	0.0874412558744126
IL32	0.206887054173234	0.0484618204846182
IL7	0.228750616749387	0.150518281505183
IMMP1L	0.007878573800263	0.181348531813485
IMP3	0.0980432909340095	0.225702429757024
IMPACT	0.0797086691901053	0.175949071759491
ISG20	0.0906789358108457	0.252724727527247
ITLN2	0.22950033489525	0.0136236376362364
JKAMP	0.111365243447994	0.12332100123321
JMJD8	0.110539082179541	0.081991800819918
JOSD1	0.0246355885588559	0.279238742792387
JOSD2	0.133098982332853	0.117854881178549
JTB	0.387800105637184	0.00899910008999102
KAAG1	0.177106823016487	0.0495200479952005
KCNE1	0.0353555872036052	0.314393560643936
KCNE2	0.0268208397266856	0.354497883544979
KCNK12	0.10616002340731	0.0914158584141586
KCTD12	0.0857568783999531	0.18968103189681
KCTD15	0.127432368781106	0.112688731126887
KCTD2	0.117859661173983	0.0846915308469153
KHDRBS3	0.179495698516947	0.115638436156384
KIAA1328	-0.00291760232368515	0.223877612238776
KIAA1586	0.0497540067290366	0.257340932573409
KIAA1671	0.0679827267033655	0.196780321967803
KIN	0.0351025433771834	0.324367563243676
KIR2DL4	0.111788344694137	0.116821651168217
KISS1	0.421074177389774	0.0173982601739826
KLF2	0.0609651018211042	0.114555211145552
KLHDC9	0.228994262020756	0.0152484751524848
KLHL29	0.130218823034046	0.0740175982401759
KLHL33	0.101302323840688	0.112513748625138
KLK4	0.119269531519883	0.129520381295204
KLRF2	0.165997241991158	0.0557944205579442
KLRG1	0.130252075449681	0.0785254807852548
KPNA7	0.189521623950682	0.0323167683231677
KREMEN2	0.208008130406418	0.0496950304969503
KRTAP1-1	0.14504136906005	0.0699930006999301
KRTAP16-1	0.117343213555571	0.0649135086491351
KRTAP2-3	0.117398950970416	0.0661333866613338
KRTAP5-11	0.0920910146267822	0.155284471552845
KRTAP5-7	0.119245347300513	0.125647435256474
KRTAP9-1	0.13929283781866	0.0677932206779323
KRTCAP2	0.299418611073816	0.020977902209779
KRTDAP	0.144768445634648	0.0885411458854114
LAMTOR2	0.340896839855048	0.0150584941505849
LAMTOR4	0.177557423150298	0.0445288804452888
LANCL1	0.0422150347922913	0.255074492550745
LAPTM4A	0.127312624137271	0.163408659134087
LAPTM4B	0.288044406730492	0.147485251474852
LCE1B	0.230219359962575	0.0346298703462987
LCE1E	0.277026925334497	0.020664600206646
LCE1F	0.277026925334497	0.021331200213312
LCE3E	0.277026925334497	0.020331300203313
LCE6A	0.318714878304351	0.0276305702763057
LCN12	0.104309274253657	0.142885711428857
LCNL1	0.0824967919910281	0.142925707429257
LEKR1	0.213566918527383	0.0513698630136987
LENEP	0.301659630250083	0.0213578642135786
LEP	0.249076719862556	0.0355297803552978
LGALS14	0.154150998190047	0.10968903109689
LGALS7	0.155514745784012	0.0820917908209179
LGALS7B	0.151712185719759	0.0954504549545045
LGI4	0.10499891025117	0.124287571242876
LHB	0.0749499372303541	0.141752491417525
LIMD2	0.158435233584277	0.0720327967203279
LIN7B	0.11157897634404	0.133086691330867
LIPT2	0.107691228275453	0.0671932806719328
LITAF	0.219819955650274	0.0457620904576209
LLPH	0.103281375077492	0.0847665233476652
LMBRD2	0.169512931090567	0.077092290770923
LOXHD1	0.0534791994561367	0.152384761523848
LPCAT1	0.229192937762911	0.0556444355564444
LPCAT3	0.111550459607842	0.0820584608205845
LPGAT1	0.244829359101964	0.0596273705962737
LRRC10B	0.0805636267658064	0.101739826017398
LRRC26	0.108641999850742	0.117831074035454
LRRC3C	0.115859125136666	0.0817251608172516
LRRC73	0.0705521407679497	0.248741792487418
LRRD1	0.241144575198162	0.0327967203279672
LSM12	0.110422676623131	0.0713328667133286
LSM2	0.0948998738790985	0.189647701896477
LSM6	0.0350941727079654	0.128153851281538
LST1	0.100242429306291	0.130770256307703
LY6D	0.124000768839069	0.151384861513849
LY6E	0.331902730901931	0.0957154284571543
LY6G5B	0.0628997177066263	0.178657134286571
LY6G5C	0.1146282963107	0.181848481818485
LY6G6C	0.0833849153505386	0.188181181881812
LY6H	0.196410496707741	0.103214678532147
LYNX1	0.273516074620659	0.141719161417192
LYPD2	0.274170703657449	0.0937506249375063
LYPD6	0.0381196067583637	0.207979202079792
LYRM4	0.099727005657766	0.126037396260374
LYSMD1	0.4032523563536	0.00887411258874113
LYZ	0.135849355377976	0.0674265906742659
M6PR	0.16094711021546	0.0557277605572776
MAD1L1	0.229185049090376	0.030996900309969
MAFA	0.289666402957763	0.0819251408192514
MAFF	0.113311389314491	0.221377862213779
MAFG	0.183403314611248	0.0425557444255574
MAFK	0.273649380532275	0.0335466453354665
MAGEF1	0.342438833419408	0.0340965903409659
MAGOHB	0.204550805009992	0.0346965303469653
MALL	0.0563455973548887	0.185881411858814
MALSU1	0.2094668670097	0.0652934706529348
MANSC4	0.166720649704825	0.0546278705462787
MAP6D1	0.38537970069223	0.0302969703029697
MB	0.0265443452806189	0.249700029997
MBOAT2	0.164877429884043	0.0594607205946072
MBP	0.00439396492657418	0.223177682231777
MCCD1	0.12732203993942	0.0815918408159186
MCEE	0.117524299630642	0.0864913508649134
MDK	0.0830783939283373	0.0907909209079093
MEA1	0.103527134414809	0.206104389561044
MED10	0.354243418761017	0.0488284504882846
MED21	0.14425497319291	0.0754924507549245
MED27	0.0672468371602608	0.178415491784155
MED29	0.112979232169956	0.108414158584142
MED30	0.330339166942071	0.0824917508249176
MEIG1	0.0754390508896413	0.193823474795378
MEOX1	0.049701870856389	0.0785921407859214
MESP1	0.093807143165303	0.179524904652392
METRN	0.110229676238947	0.0828167183281672
METTL11B	0.199213839964038	0.0256224377562244
METTL2A	0.134697884009778	0.084991500849915
MGP	0.163909664921634	0.075972402759724
MGST2	0.0322683034749903	0.148185181481852
MGST3	0.310754033974872	0.00756591007565911
MIEN1	0.127239696875324	0.087091290870913
MIF	0.0877401241738314	0.180465286804653
MIF4GD	0.0634660509181198	0.0995233809952339
MLF1	0.431788781311796	0.0276305702763057
MLN	0.139303897437653	0.143110688931107
MORN2	0.139311081828546	0.0796420357964204
MPC2	0.253120412486462	0.0324967503249676
MPLKIP	0.279538539269859	0.0341299203412992
MPV17L	0.109652136217339	0.0785921407859215
MPZ	0.401529303195273	0.0143485651434857
MRC1	0.00532485591802788	0.209304069593041
MRFAP1	0.0359692388842359	0.205039496050395
MRPL12	0.186126699614932	0.0399293403992934
MRPL13	0.341407094797981	0.112213778622138
MRPL21	0.111194848290518	0.13715295137153
MRPL36	0.327169256712352	0.0356964303569643
MRPL41	0.140427907350011	0.0769173082691731
MRPL44	0.025315530492749	0.274505882745059
MRPL46	0.0824149637418152	0.301436523014365
MRPL48	0.116436954958745	0.0665933406659334
MRPL51	0.184272113184221	0.0574609205746092
MRPL9	0.385716772303851	0.00836583008365827
MRPS10	0.0320577727643134	0.245875412458754
MRPS11	0.043963458943216	0.313835283138353
MRPS12	0.140144442327165	0.101539846015399
MRPS14	0.157963958802117	0.031021897810219
MRPS16	0.0227109696473197	0.334199913341999
MRPS18A	0.0269656955092506	0.26987301269873
MRPS21	0.243331968642436	0.0256974302569743
MRPS23	0.137492180654342	0.0527613905276139
MRPS33	0.222545923393508	0.0512615405126155
MRPS34	0.164948582991785	0.0613688631136886
MRPS35	0.0877572072624352	0.0954904509549045
MRPS7	0.126125968595281	0.0970902909709028
MSI2	0.0780388587491398	0.0742592407425922
MSL1	0.0994327725902869	0.0962570409625703
MSMB	0.0172956104108986	0.221202879712029
MSRB1	0.0739724171384328	0.141160883911609
MSRB2	0.0352132625592577	0.186481351864814
MT1G	0.0899850333625922	0.0769589707695897
MT1X	0.0886541015509309	0.0758257507582575
MTA1	0.0661747356905345	0.178515481785155
MTFP1	0.0921567567807453	0.212218778122188
MTHFS	0.0709382353674126	0.202359764023597
MTMR12	0.239597149235775	0.0399626703996267
MTNR1A	0.0360911289931701	0.231543512315435
MTPN	0.2343987647731	0.043945605439456
MTRNR2L3	0.349012865714372	0.0211478852114789
MTRNR2L5	0.034231171547899	0.173995100489951
MTRNR2L7	0.0548628364248449	0.168583141685831
MTRNR2L8	0.0471879914938378	0.16028397160284
MUC12	0.239603332244053	0.0249475052494751
MUCL1	0.107098880075453	0.0896410358964104
MXD4	0.0516227060079884	0.239042762390428
MYADML2	0.1595018718799	0.052323339094662
MYL10	0.103529913819157	0.0692597406925975
MYL12A	0.096686832539705	0.136211378862114
MYNN	0.567166226440789	0.0292304102923041
MYO10	0.189936580920156	0.0625187481251875
MZT1	0.165921198140088	0.153884611538846
NABP1	0.0569407973525926	0.225810752258108
NABP2	0.0652552434564102	0.10665600106656
NACAD	0.272512882429352	0.0256974302569743
NACC2	0.11420445138155	0.162650401626504
NANOGNB	0.195956971147747	0.0341215878412159
NANOS1	0.0215753854937309	0.216728327167283
NAT14	0.108763733492597	0.109169083091691
NAT8L	0.0414563282708966	0.257507582575076
NAT9	0.126125968595281	0.0981235209812353
NCCRP1	0.142561395973487	0.109489051094891
NCEH1	0.373461785400425	0.0584691530846915
NCR3	0.0780907127177459	0.195113821951138
NCR3LG1	0.04441021371606	0.161317201613172
NDFIP2	0.206169078322717	0.0782255107822551
NDRG1	0.332297135431705	0.0893910608939106
NDUFA4L2	0.0764430715145652	0.0975902409759024
NDUFA6	0.0248522408718881	0.295620437956204
NDUFA8	0.133920266770797	0.0591607505916075
NDUFAF6	0.43824115595416	0.0101989801019898
NDUFB10	0.0512535373609165	0.169449721694497
NDUFB2	0.226124404294223	0.0501616505016166
NDUFB9	0.177752287113573	0.146085391460854
NDUFC1	0.0267262429684264	0.13645302136453
NDUFC2	0.0852764290742568	0.0676932306769323
NDUFS6	0.234265074079525	0.0479666319082378
NENF	0.376916413260498	0.0263640302636403
NEUROD2	0.0805693664717335	0.107889211078892
NFKBIE	0.0430582733126554	0.266006732660067
NGRN	0.0657330881931925	0.254799520047995
NHLH1	0.403096770838563	0.0026997300269973
NIPAL2	0.327498940625113	0.10981401859814
NIT1	0.291528742949938	0.0113788621137886
NKD2	0.261410186139457	0.0496450354964504
NMB	0.11961519036656	0.0885661433856614
NME1	0.110484841866041	0.0518614805186148
NME2	0.131888335071934	0.0552611405526114
NME3	0.146547485353604	0.0917479680603368
NMRAL1	0.219688449892831	0.113088691130887
NNAT	0.40335498542847	0.018023197680232
NOG	0.127857569088938	0.0617438256174382
NOL7	0.0642604318785233	0.16993300669933
NOP10	0.0234121797528345	0.279438722794387
NOS1AP	0.128881134163752	0.0396460353964604
NOTO	0.158793853331109	0.0592940705929407
NPB	0.156816839641312	0.050969903009699
NPL	0.323512326687629	0.00269973002699731
NPM3	0.0233977435270198	0.251774822517748
NPPC	0.025315530492749	0.274472552744725
NPW	0.137092874653831	0.0936781321867813
NQO2	0.0925004981307661	0.18321501183215
NRARP	0.095888424153625	0.133926607339266
NRBP2	0.270194160367571	0.142452421424524
NRGN	0.0978171623342111	0.0738592807385927
NRIP2	0.140338509898709	0.0838916108389161
NSMCE2	0.314465904004368	0.080991900809919
NT5C	0.122934557418121	0.0873662633736626
NTMT1	0.110007268710092	0.164883511648835
NUBP2	0.172116305520888	0.128687131286871
NUDT19	0.0460722062235067	0.174082591740826
NUDT3	0.0132148527138268	0.211412192114122
NUDT8	0.0983698179895064	0.13038696130387
NUPR1	0.18971095939952	0.131686831316868
OLAH	0.0375501859109535	0.297670232976702
OLIG1	0.0554073948039897	0.164108589141086
OMP	0.13088225862945	0.0629270406292704
OPTN	0.0356358711534111	0.277172282771723
ORMDL1	0.0724807167907262	0.168433156684331
ORMDL3	0.0952789833149278	0.100709929007099
OTUD1	0.079930249371579	0.141302536413025
OTUD6B	0.209679666351767	0.153084691530847
OXCT1	0.15638744041992	0.052661400526614
PAFAH1B3	0.0930806910689087	0.12033796620338
PAIP1	0.21907682353828	0.0623687631236877
PAIP2B	0.160053337082532	0.0743675632436756
PALM3	0.121755334792907	0.0715928407159283
PAQR5	0.0625096968204496	0.242750724927507
PATE4	0.098848129194942	0.077192280771923
PCBD1	0.0342213683192426	0.2000199980002
PCCA	0.0594442995283596	0.135853081358531
PCP4	0.00942082483688936	0.196980301969803
PCP4L1	0.328935094011369	0.0237690516662619
PDCD5	0.163576664791429	0.0940905909409059
PDE6D	0.0409370926489646	0.26330700263307
PDE6G	0.147709928000621	0.0477618904776189
PDE6H	0.106297470465272	0.090990900909909
PDRG1	0.296693045488423	0.0188481151884811
PDXP	0.0345105469033298	0.304919508049195
PEA15	0.388179759932168	0.00646602006466018
PECR	0.0222738422620235	0.244750524947505
PEPD	0.0190262528961804	0.16050894910509
PET117	0.266524679187967	0.0243775622437756
PEX11A	0.0823704097688539	0.304502883045029
PEX16	0.080359349394616	0.131386861313869
PEX19	0.326508719901948	0.00312468753124686
PEX26	0.107235475772036	0.151518181515182
PFDN2	0.281250329054307	0.0173382661733827
PFDN4	0.266502970325307	0.032021797820218
PFDN5	0.084553790778518	0.104656201046562
PFN2	0.332194440739938	0.0384628203846282
PFN3	0.0807649661227993	0.0995567109955671
PGP	0.147730024083591	0.0906766466210522
PHF11	0.0231003090392351	0.213178682131787
PHF5A	0.0437068066342053	0.266373362663734
PHOX2A	0.0938962810778628	0.186114721861147
PHYHD1	0.0689497066850034	0.188514481885145
PIANP	0.14151758137508	0.0598606805986068
PIGC	0.397766449268889	0.0037996200379962
PIGM	0.130572517011595	0.017331600173316
PIGP	0.0443790996719717	0.258374162583742
PIGX	0.508418393233933	0.0415625104156251
PILRA	0.136417381317456	0.0443622304436223
PIP	0.248999021509761	0.0339299403392994
PIP5KL1	0.0845025119655315	0.16301703163017
PLA2G10	0.093634675609582	0.0919158084191581
PLAC9	0.0319933087603307	0.230443622304436
PLCXD3	0.113475589456222	0.0641535846415358
PLGLB1	0.10987667406515	0.0924074259240743
PLGLB2	0.114007531746512	0.0835316468353164
PLGRKT	0.110313459976696	0.0839249408392494
PLIN1	0.0836541211148016	0.302203113022031
PMAIP1	0.0320354181371894	0.188414491884145
PMF1	0.40204555078881	0.00737426257374267
PMM2	0.229162077465712	0.0434956504349565
POLE4	0.156133363919627	0.0639436056394361
POLR1C	0.0733965183668174	0.256874312568743
POLR2D	0.0353418289805859	0.210145652101456
POLR2H	0.387631531981528	0.115113488651135
POLR2J	0.14609689571642	0.0588607805886078
POLR2J2	0.168947671787315	0.0494950504949504
POLR2K	0.341097655307408	0.0726070250117846
POLR3H	0.0408947826269656	0.317893210678932
POU5F1B	0.139547959652825	0.149718361497184
PPDPF	0.419812292166323	0.0226977302269773
PPIA	0.299540104644742	0.0285638102856381
PPIAL4C	0.0549876630845845	0.0886911308869114
PPIF	0.0226912882315544	0.247008632470086
PPIL1	0.133060148675009	0.163183681631837
PPM1L	0.0345080150857597	0.115321801153218
PPP1CA	0.109354138465855	0.135619771356198
PPP1R14A	0.102269677211464	0.108714128587141
PPP1R2	0.299476466480213	0.0555944405559444
PPP1R27	0.151735257967799	0.0464953504649535
PPP1R37	0.0913408373271536	0.108689131086891
PPP1R3D	0.235467805320819	0.0275639102756391
PPP1R3G	0.108751932421729	0.130686931306869
PPP3R1	0.200705349593955	0.0511948805119488
PPY	0.0904380160776999	0.0731426857314268
PRCD	0.173427097582749	0.0445955404459554
PRDX3	0.0189738161125953	0.249808352498083
PRDX5	0.0966127441111485	0.0818251508182515
PRKAR1A	0.132725911536891	0.0816918308169184
PRKCE	0.114605097740234	0.0797920207979204
PRPH2	0.0699260044382222	0.265673432656734
PRR13	0.0970412794134762	0.0984901509849015
PRR15	0.223407728222427	0.0412458754124587
PRR15L	0.109652214793713	0.0696430356964304
PRR9	0.28703923406167	0.0245261188166898
PRRG2	0.000370331783926365	0.187914541879145
PRRT1	0.0896056712463059	0.197846881978469
PSENEN	0.0997171993887942	0.117654901176549
PSMA7	0.231523032145277	0.0297636902976369
PSMB9	0.0896056712463059	0.195280471952805
PSMG2	0.103216609644432	0.161650501616505
PSMG3	0.342869217402442	0.0203729627037297
PSMG4	0.098804178789236	0.142565743425658
PSORS1C2	0.0886136114721805	0.257607572576076
PTCRA	0.0241682264132286	0.286404692864047
PTGER1	0.109088761406066	0.0760173982601741
PTGES	0.102703762805664	0.146285371462854
PTGES3	0.0657438035483744	0.101123221011232
PTH2	0.104459372877229	0.119363063693631
PTMA	0.025315530492749	0.276205712762057
PTMS	0.181519897879783	0.0517948205179482
PTN	0.223785080766495	0.0480618604806187
PTP4A1	0.0354915909203427	0.209812352098124
PTP4A3	0.247916363426097	0.147951871479519
PTRH2	0.155999458472253	0.0537196280371963
PTS	0.0770499136107182	0.151684831516848
PUF60	0.270194160367571	0.140919241409192
PVALB	-0.0172355235950651	0.281946805319468
PXDC1	0.0925004981307661	0.178682131786821
PXT1	0.0681287666630693	0.154584541545846
PYURF	0.036187996152304	0.14020597940206
PYY	0.0488767883481381	0.0787587907875879
RAB12	0.0497770151244223	0.153759624037596
RAB18	0.0665740326172228	0.19960503949605
RAB1A	0.15677085321041	0.0624937506249375
RAB22A	0.279386944640351	0.0222477752224778
RAB26	0.174836076264115	0.115655101156551
RAB30	0.0851109060005227	0.082891710828917
RAB31	0.0392714232902763	0.178707129287071
RAB40B	0.0853301475365319	0.0636936306369363
RAB5B	0.0595152807615971	0.114488551144885
RABGAP1L	0.049675672239869	0.0671932806719329
RAC3	0.180838956715081	0.0396960303969603
RAD1	0.207517507643212	0.05994400559944
RAD21L1	0.181947867775022	0.0649268406492683
RAI14	0.219473343530853	0.0686931306869312
RANBP3L	0.104916125272744	0.103689631036896
RAP2A	0.0913211510535054	0.187614571876146
RARRES1	0.494583061658757	0.0177648901776489
RASAL2	0.106491010718762	0.0345965403459654
RASL11A	0.0229863231719308	0.22694397226944
RASSF3	0.043945476347342	0.105456121054561
RBFOX3	0.140351354470751	0.0486151384861514
RBKS	0.184858931297315	0.0681598506815983
RBM20	0.0206691117088588	0.227643902276439
RBP5	0.140936040816788	0.0587441255874411
RBPMS2	0.0342547388805074	0.252649735026498
RBX1	-0.0293389623141548	0.376695663766957
RCAN1	0.0123666454629464	0.261173882611739
RCCD1	0.0571427269204989	0.22951704829517
REEP3	0.0137659725101805	0.248308502483085
REP15	0.188116988481663	0.0607689231076892
RFPL4A	0.0870924700572179	0.118913108689131
RFX8	0.0774975354844561	0.151604839516049
RGCC	0.0218198763730163	0.205379462053795
RGL1	0.0886768613902638	0.0442955704429557
RGS9BP	0.12821129697031	0.0969069759690698
RHBDD1	-0.00114462986063546	0.278772122787721
RHBDD3	0.100560011699554	0.23012698730127
RHBDL1	0.20763443832869	0.0478618804786188
RHPN1	0.271157551504372	0.122687731226877
RHPN2	0.0217460798280117	0.162117121621171
RIIAD1	0.308370767081446	0.0212478752124788
RIMBP3C	0.0579059829059828	0.266706662667067
RINL	0.106963142255858	0.12675399126754
RIOK3	0.101603063219287	0.173382661733827
RMI2	0.219689317586467	0.0432623404326234
RNASEH2C	0.105966266942107	0.0960903909609038
RNF114	0.335416605212084	0.0192980701929807
RNF13	0.012149431194576	0.114421891144219
RNF144B	0.0251204930877249	0.204212912042129
RNF168	0.511414647915581	0.0400959904009599
RNF181	0.115861874239419	0.0946238709462387
RNF208	0.0499672113165074	0.173949271739493
RNF215	0.0477996686308307	0.267639902676399
RNF224	0.110599404585814	0.108901609839016
RNF4	0.0414276073561113	0.191380861913809
RNF5	0.0780907127177459	0.192447421924474
RNLS	-0.014049730706397	0.248741792487418
ROGDI	0.0838209579850221	0.150418291504183
ROMO1	0.377433287971987	0.0174482551744826
ROPN1L	0.262718531059714	0.0590340965903409
RPL17	0.0490640240876721	0.189381061893811
RPL18	0.088117331411722	0.0897660233976603
RPL19	0.0652012680399566	0.105422791054228
RPL21	0.02173412440142	0.218528147185281
RPL22L1	0.481540182697566	0.0368629803686298
RPL27	0.0840846512396903	0.0639602706396027
RPL30	0.36154946277216	0.0935506449355065
RPL36AL	0.147043802810447	0.0693597306935973
RPL37	0.27055639189344	0.043095690430957
RPL37A	0.0522415333974846	0.218003199680032
RPL38	0.156452764536087	0.0664558544145585
RPL39L	0.395671487362793	0.0338566143385661
RPL41	0.0932260302054454	0.0828083858280838
RPL7L1	0.0590454523211322	0.231401859814019
RPL9	0.0400824764345991	0.184614871846148
RPLP1	0.0692088027173709	0.196913641969136
RPP21	0.0974683205131979	0.194147251941473
RPP25	0.0654699289646768	0.242400759924008
RPP25L	0.0840603929147392	0.13645302136453
RPP38	0.0696694345084069	0.2501499850015
RPRD1B	0.376370400216092	0.0136986301369863
RPRML	0.0969206765726629	0.0691730826917308
RPS11	0.117794211867292	0.132086791320868
RPS16	0.129149324775194	0.100689931006899
RPS17	0.0751856916474974	0.163396160383962
RPS18	0.0933301252798515	0.177382261773823
RPS19BP1	0.0522682445759368	0.346365363463654
RPS24	0.0370379199024644	0.264473552644736
RPS25	0.0984355879408166	0.0757590907575908
RPS26	0.0611265966017013	0.10998900109989
RPS27	0.285970015245654	0.0196480351964804
RPS27L	0.0469661774722712	0.216318368163183
RRNAD1	0.2416333367159	0.0233976602339766
RRP36	0.0911541558049964	0.19022097790221
RRS1	0.22728205530659	0.148051861480518
RSPO2	0.185883401121403	0.153284671532847
RSRC1	0.235937215232601	0.0655184481551847
RSU1	0.0564091420788562	0.107289271072893
RWDD2B	0.0536483756350611	0.206779322067794
RXFP4	0.419356533316713	0.00343299003432991
RXRA	0.0900593733667204	0.170649601706496
S100A10	0.357831433285422	0.0147185281471853
S100A11	0.262345801351654	0.0202313102023131
S100A12	0.312856946778836	0.0208979102089791
S100A13	0.349549159304466	0.0160983901609839
S100A14	0.313746118831849	0.0171232876712329
S100A16	0.297728907506135	0.0177315601773156
S100A2	0.422095526324151	0.003999600039996
S100A3	0.358894479388782	0.0135236476352365
S100A4	0.406459285192551	0.00834916508349165
S100A5	0.256195574490942	0.0256974302569743
S100A6	0.288728934910103	0.0257259988286885
S100A8	0.350626267560249	0.0154784521547845
S100A9	0.322111830732839	0.0194730526947305
S100P	0.0429013628526189	0.17336837744797
SAMD12	0.39085015494561	0.0748758457487585
SAP25	0.211235276822686	0.0382128453821285
SAPCD1	0.10018472528176	0.163158684131587
SAPCD2	0.0946631898105853	0.141825817418258
SCAND1	0.304135300900814	0.020997900209979
SCGB1A1	0.0813428958296771	0.132653401326534
SCGB2A1	0.0593647000647804	0.111722161117222
SCHIP1	0.250718316607412	0.0562443755624437
SCN1B	0.114859286938544	0.102523081025231
SCNM1	0.26358342511403	0.0192314101923141
SDCBP2	0.182696931445434	0.0614271906142718
SDF2	0.141527156430907	0.0731260207312602
SDHAF1	0.153400859447372	0.0863913608639137
SDHC	0.325030605227593	0.0100789921007899
SEC11C	0.0647775909600544	0.202946372029464
SEC14L6	0.0847046899743122	0.176368077477966
SECTM1	0.139378313269311	0.0583691630836916
SEMA5A	0.207417253210161	0.0363213678632137
SENP8	0.0655084213787257	0.232151784821518
SEPHS1	0.0356358711534111	0.269406392694064
SERP1	0.261183525355824	0.0513198680131987
SERP2	0.0183359583035656	0.227543912275439
SERTAD1	0.10518266903049	0.116588341165884
SETD1B	0.0536573491164145	0.101023231010232
SFT2D2	0.224685133652305	0.0202646402026464
SFTA2	0.115755468737805	0.129720361297203
SH2D1B	0.324633402920813	0.00256641002566408
SHC1	0.228951482010777	0.022997700229977
SHISA7	0.0443571817210471	0.138626137386261
SIT1	0.154560387085448	0.0818584808185847
SIVA1	0.0675324835729459	0.167883211678832
SKP2	0.280667664998509	0.0347631903476319
SLA2	0.261179643119332	0.0229310402293104
SLAMF6	0.323512326687629	0.0024664200246642
SLAMF7	0.256178293202597	0.00383295003832951
SLBP	0.0465423142235281	0.231126887311269
SLC16A8	0.0382770549359769	0.292670732926707
SLC1A3	0.185527721042559	0.0514748525147485
SLC25A17	0.0393230827889107	0.357597573575976
SLC25A19	0.160206514011847	0.0729760357297603
SLC25A21	0.107925833628022	0.0837416258374162
SLC25A29	0.110198502380381	0.130746925307469
SLC35E4	0.0403601335844989	0.311268873112689
SLC39A11	0.113838279211112	0.0885744758857447
SLC48A1	0.133810713969742	0.064326900643269
SLC51A	0.312514692813707	0.0603606306036062
SLC51B	0.0473483626037444	0.230951904809519
SLIRP	0.150884853515003	0.0668599806685998
SLURP1	0.327318339989693	0.0911708829117087
SMIM4	0.0224200840501874	0.217011632170116
SMYD3	0.144913099836586	0.0582608405826084
SNAPC5	0.0539203845824063	0.224357564243576
SNAPIN	0.294333684779777	0.0117788221177882
SNF8	0.0834632126913411	0.0717928207179283
SNRPA1	0.0610378468260498	0.309135753091358
SNRPD1	0.0918104501691899	0.132926707329267
SNRPD3	0.0471685617891449	0.27009799020098
SNRPE	0.402437614593638	0.0187231276872313
SNRPF	0.086041227466645	0.103356331033563
SNRPG	0.16173548878679	0.0592940705929407
SNTB1	0.223029604182615	0.146385361463854
SNX22	0.038596268533736	0.120754591207546
SOCS1	0.259228585174936	0.0416958304169583
SOCS3	0.118813749149482	0.0444288904442889
SOCS7	0.042896766042414	0.10948905109489
SOSTDC1	0.275315078903998	0.0264306902643069
SP9	0.0609051662542299	0.194530546945306
SPATA3	0.0261406130009998	0.273472652734726
SPCS1	0.0217256396057429	0.216378362163784
SPDYE2	0.23741355593098	0.0254474552544745
SPINK8	0.0272133586532382	0.199180081991801
SPINT2	0.034715689252443	0.163308669133087
SPRED3	0.181846251421309	0.0904909509049096
SPRR1B	0.351177842109716	0.0101989801019898
SPRR2A	0.350332211338704	0.0170582941705829
SPRR2D	0.27169047905524	0.0246175382461754
SPRR2F	0.243480568317943	0.0251974802519748
SPRR2G	0.248657587742309	0.0277222277772223
SPRR4	0.275787767961511	0.0218311502183115
SPRY2	0.0857568783999531	0.188281171882812
SPRYD4	0.0824199392984045	0.10983901609839
SPTSSB	0.551464645187272	0.0131236876312369
SRD5A1	0.292893335294271	0.0453383233105262
SRP9	0.334054886668937	0.0265773422657734
SRSF9	0.0536573491164145	0.103589641035896
SSC5D	0.0870515056377422	0.121612838716128
SSNA1	0.112556235540125	0.13991100889911
SST	0.466975347091472	0.0207645902076459
STH	0.0916624699589616	0.0729177082291771
STK3	0.205087398170298	0.148085191480852
STK32B	-0.0309125913767601	0.211378862113789
STK39	-0.00997529248039076	0.230510282305103
STRA8	0.10415921683481	0.0723261007232611
STX18	-0.00271919664054652	0.286271372862714
STX6	0.103662339309339	0.0443555644435557
SUB1	0.2831259891371	0.0458620804586208
SUCNR1	0.471606511145341	0.0217978202179782
SULT1A3	0.145820185398173	0.0680265306802652
SUMO2	0.151367252038988	0.0662362335195053
SUMO3	0.0692265055194703	0.172182781721828
SUPT3H	0.0657988043878801	0.184614871846149
SUPT4H1	0.187435168477679	0.0439456054394561
SYNGR1	-0.0461887427421815	0.333133353331334
SYNGR2	0.121155577433433	0.0534279905342799
SYNGR3	0.168582047445973	0.107814218578142
TAC3	0.0979600528217163	0.0969403059694031
TAC4	0.118980108433056	0.0591940805919408
TACO1	0.151510811744778	0.0651934806519348
TADA2A	0.0150409322112078	0.130786921307869
TAF8	0.103830924714895	0.167943205679432
TARM1	0.110815617981999	0.110948905109489
TATDN1	0.250477365157456	0.0952504749525048
TBC1D30	0.0966888756229518	0.0806752658067526
TBCCD1	0.300469633889915	0.0380628603806286
TCF19	0.0403592179820211	0.27310602273106
TDRD12	0.0916990463218253	0.115538446155385
TEDDM1	0.149250319080185	0.0164983501649835
TEF	0.0573498964846307	0.251214878512149
TEN1	0.143894612148414	0.0582191780821917
TEX12	0.0773593195513122	0.148985101489851
TEX22	0.0915359313573302	0.114588541145886
TEX30	0.0511395578021681	0.183081691830817
TEX36	0.0310039654189489	0.232410092324101
TFF1	0.0663388223460739	0.149165083491651
TFF2	0.0308491313615346	0.220011332200114
TFF3	0.0665397280868723	0.14998500149985
THAP10	0.0236592409240924	0.287504582875046
THAP2	0.0748112276040548	0.0976652334766523
THEM4	0.357270905059619	0.019023097690231
THEM6	0.337769174291662	0.0679074949647893
TIAF1	0.123392575313358	0.0816585008165851
TIGD1	0.0395482037600757	0.262673732626738
TIMM10	0.100927989810308	0.0805586108055861
TIMM13	0.0966466676195177	0.0809585708095857
TIMM17A	0.380547929318738	0.0394293903942939
TIMM23	0.0242719719948873	0.224844182248442
TIMM8B	0.067729092735083	0.175549111755491
TLX2	0.184920945704486	0.0591274205912742
TM4SF19	0.386640829962626	0.0601939806019399
TMEM123	0.0491778607418611	0.186614671866147
TMEM128	0.0452418246300587	0.187147951871479
TMEM129	0.0418693132911479	0.212503749625038
TMEM134	0.147737357982288	0.111708829117088
TMEM141	0.0974468421320178	0.130786921307869
TMEM147	0.103877834017986	0.12655401126554
TMEM14A	0.0469341299429655	0.198646801986468
TMEM14B	0.0995360476234109	0.163633636636336
TMEM14C	0.123470036816772	0.142410758924107
TMEM150A	0.145256088037726	0.0619604706196047
TMEM151B	0.0863711194501127	0.171332866713329
TMEM160	0.102988787102591	0.123587641235876
TMEM17	0.129763199283596	0.0652268106522681
TMEM170B	0.100185146594855	0.162283771622838
TMEM179	0.0678197833168254	0.127787221277872
TMEM211	0.02618804481345	0.301003233010032
TMEM212	0.374803628785512	0.0426814461411002
TMEM213	0.175319604297588	0.0513282005132819
TMEM216	0.0809623578773453	0.106389361063894
TMEM221	0.0945728816555901	0.0847415258474151
TMEM229A	0.222136449360603	0.0498283504982834
TMEM233	0.0336289564873478	0.107514248575142
TMEM235	0.143600452858959	0.04995500449955
TMEM236	0.0740340594561263	0.137623737626237
TMEM238	0.118299798827274	0.0965046352507606
TMEM241	0.055064099100222	0.168183181681832
TMEM251	0.114890272805963	0.090607605906076
TMEM41A	0.464496633608881	0.025972402759724
TMEM44	0.419007173521031	0.0455954404559543
TMEM65	0.314132202750481	0.0700929907009299
TMEM71	0.376135974656511	0.0089657700896577
TMEM92	0.156478292075029	0.0530613605306136
TMSB10	0.111926711550573	0.084991500849915
TNF	0.0780907127177459	0.192014131920141
TNFAIP8L2	0.295494309046289	0.0165983401659834
TNFRSF13C	0.0361115388281531	0.366596673665967
TOB2	0.0349413148654266	0.358597473585975
TOMM20	0.200904931019199	0.053869613038696
TOMM22	0.130744969597719	0.239509382395094
TOMM40L	0.331114241992595	0.00774922507749226
TOMM7	0.246199399286604	0.0455954404559544
TOR1A	0.134391200396405	0.151151551511516
TOR4A	0.0531879930359349	0.202079792020798
TPGS1	0.0328818255366637	0.125954071259541
TPMT	0.0740629408687265	0.193980601939806
TPRG1	0.360759905059227	0.055994400559944
TRAM2	0.0225571773161953	0.201713162017132
TRIB1	0.168895898503496	0.119288071192881
TRIO	0.236440095137273	0.052094790520948
TRIQK	0.305652098099167	0.0767208993386375
TRMT112	0.0666606344649334	0.105322801053228
TRMT12	0.274190838453318	0.140685931406859
TRMT44	0.0376557896534316	0.265140152651401
TSC22D4	0.176808359479886	0.0458954104589541
TSEN15	0.150599846745502	0.015665100156651
TSEN54	0.0746998666073809	0.102189781021898
TSPAN9	0.146577176560386	0.0632936706329367
TSPO	0.0460936241046671	0.254699530046995
TSPO2	0.0370475331000966	0.236326367363264
TSTD1	0.320891279330838	0.0161983801619838
TTC23L	0.177324864519987	0.06993300669933
TTC28	0.133741224279367	0.238642802386428
TTC32	0.136150770686215	0.148660133986601
TTC36	0.0833841701099244	0.0612605406126054
TTC39C	0.0904801145360747	0.176515681765157
TXN2	0.0361115388281531	0.375662433756625
TXNDC9	0.0269960392446616	0.235076492350765
TYW5	0.0420850901901149	0.225577442255774
U2AF1L4	0.104251526095714	0.125220811252208
UAP1L1	0.107727746985459	0.143352331433523
UBAP1L	0.0473822762683857	0.213658634136586
UBD	0.0959718726873299	0.194447221944472
UBE2D1	0.00415195041683659	0.202396427023964
UBE2E3	0.033426246756639	0.196713661967137
UBE2H	0.268227432528244	0.0301469853014699
UBE2K	0.0223531038865878	0.135086491350865
UBE2N	0.0443604030100556	0.117654901176549
UBE2QL1	0.257969300175256	0.0603368234605111
UBE2R2	0.0574213938186607	0.105822751058227
UBE2T	0.303801735314143	0.0320634603206346
UBE2Z	0.0730209266773014	0.0638936106389361
UCHL5	0.22992681381589	0.0451621504516215
UCK2	0.127644664273252	0.0494283904942838
UCMA	0.0780279845863552	0.262040462620404
UCN	0.115881162369672	0.0769323067693231
UCN3	0.0746059535191669	0.255549445055494
UFC1	0.359539400662274	0.00693930606939309
UFM1	0.129273228662274	0.167403259674033
UQCR10	0.108656414901912	0.227077292270773
URB1	0.053803930384514	0.166908309169083
URM1	0.0616657158082122	0.180848581808486
USF1	0.257417450575583	0.00409959004099588
USF2	0.10499891025117	0.126687331266873
UTF1	0.0358778284818522	0.197240275972403
VAMP4	0.250924777101098	0.0209479052094791
VAMP8	0.0766276796607013	0.0995400459954005
VASP	-0.0262337207652484	0.200579942005799
VEGFA	0.0696512000147574	0.255407792554078
VKORC1L1	0.239948718563444	0.0375962403759624
VPREB3	0.0598791344413985	0.234551544845515
VPS25	0.104478536100618	0.0524947505249475
VSIG10L	0.0769050761998434	0.127687231276872
VSIG8	0.327550386568614	0.0031996800319968
VSNL1	0.103166541310121	0.0725427457254275
VSTM2B	0.16697217420532	0.0594940505949405
VSTM5	0.0932568726777862	0.0901659834016599
VWA5B2	0.424985546840575	0.0241725827417259
WBP4	0.0161736523047358	0.218411492184115
WDR61	0.0663072980636552	0.268973102689731
WDR70	0.162436339693875	0.0674432556744327
WDR87	0.135706313709131	0.104214578542146
WNT10A	0.0261406130009998	0.272206112722061
WNT6	0.0265531542551252	0.27290604272906
XRCC3	0.047928311617289	0.145252141452521
YEATS4	0.105419070391136	0.0795920407959204
YIPF3	0.0729002216972954	0.255374462553745
YPEL2	0.0189082590143702	0.0923574309235744
YPEL4	0.074630143098706	0.12645402126454
YPEL5	0.133208602360921	0.064326900643269
ZAR1L	0.0193021722483437	0.193540645935407
ZBED6	0.323376145826487	0.0263640302636403
ZBTB42	0.10236878513968	0.115671766156718
ZC2HC1A	0.245610706991983	0.144852181448522
ZCCHC24	0.0327748379563816	0.265098490150985
ZDHHC19	0.438880401632752	0.0436706329367063
ZDHHC22	0.15081055367725	0.0673599306735993
ZDHHC24	0.177160541298831	0.0557944205579442
ZFHX2	0.111573790806047	0.0776922307769224
ZFR	0.128915192569954	0.0542279105422791
ZFYVE21	0.0643062753018947	0.180915241809153
ZG16	0.145820185398173	0.0658267506582677
ZMYND19	0.100776414917106	0.16301703163017
ZNF131	0.172389497137846	0.0788171182881711
ZNF146	0.13248888876951	0.109622371096224
ZNF205	0.217342371227331	0.122354431223544
ZNF444	0.12709761649385	0.123787621237876
ZNF541	0.0664274425753934	0.150051661500516
ZNF572	0.177752287113573	0.146152051461521
ZNF575	0.106390234032868	0.128187181281872
ZNF580	0.156095822556186	0.0714678532146784
ZNF623	0.240433284539279	0.144618871446189
ZNF696	0.218433192530013	0.126020731260207
ZNF706	0.331996400272017	0.0725641721542132
ZNF707	0.179497372644761	0.148518481485185
ZNF771	0.195944715703177	0.069018098190181
ZNF774	0.0320097838186185	0.318534813185348
ZNRF2	0.306721029396979	0.0224227577242276
ZSCAN16	0.132910417159106	0.162317101623171
ZSCAN23	0.0919609170027486	0.178648801786488

## Sheet: pancancer_unprotected
Gene	Mean Pi score	Distribution percentile (with permutations)
A4GALT	-0.717887800525461	0.0097990200979902
ACTA1	-0.521722770976263	0.0597273605972736
ACTB	-0.580769418651825	0.0225310802253108
ACTBL2	-0.668014531828304	0.0184106589341066
ACTC1	-0.587284970055258	0.045115488451155
ACTL7B	-0.655994635004385	0.0304636203046362
ACTL8	-0.58623442755485	0.0501199880011999
ACTL9	-0.73401883226627	0.0077992200779922
ADAM20	-0.570446349560419	0.0461953804619538
ADAM21	-0.644674821343449	0.0275805752758057
ADAM29	-0.675477210129181	0.0116113388661134
ADM	-0.692895957402869	0.0138652801386528
ADM2	-0.667224111799088	0.0256974302569743
ADO	-0.588082928812656	0.0506282705062827
ADRA2A	-0.644720910292693	0.0248175182481752
ADRA2B	-0.614193413902839	0.0318218178182182
ADRA2C	-0.649708993983231	0.0203812952038129
ADRB1	-0.653844575350217	0.0269639702696397
ADRB2	-0.615574264195268	0.035613105356131
AHDC1	-0.591878154623326	0.0518519576613767
AHSP	-0.595159770880123	0.0467619904676199
ALDH1B1	-0.616122757096179	0.028017198280172
ALPI	-0.598613307965558	0.0472952704729527
ALPP	-0.622470057572614	0.0368677417972488
AMIGO1	-0.597349246307898	0.0522233490936621
AMIGO2	-0.605088559110716	0.0491450854914509
AMIGO3	-0.647968945802789	0.0250260688216893
AMY2A	-0.488707634419586	0.0467953204679532
AMY2B	-0.565961513627951	0.0590607605906076
ANG	-0.545439192836496	0.06332700063327
ANKRD33	-0.574034954861468	0.0560693930606939
ANKRD34A	-0.605587216261794	0.0453154684531547
ANKRD34B	-0.661331081239527	0.0213228677132287
ANKRD65	-0.588167065778552	0.0527947205279472
ANP32D	-0.633463452121907	0.0427457254274572
APLNR	-0.676010921924758	0.0169149751691498
APOA4	-0.626971349306713	0.0209312402093124
APOF	-0.584757897693571	0.0480451954804519
AQP4	-0.429706942149346	0.0855581108555812
AQP6	-0.526728558567563	0.0608939106089391
ARHGDIG	-0.575579888466901	0.0361630503616305
ARHGEF15	-0.536642811187438	0.0596940305969403
ARL11	-0.605442530048708	0.126827317268273
ARL14	-0.682699697964269	0.0149318401493184
ARL4A	-0.514090062212547	0.158634136586341
ARL4C	-0.693420882643338	0.0140485951404859
ARL4D	-0.642102129773721	0.0282305102823051
ARSA	-0.626259399294997	0.0246725327467253
ARSI	-0.532709814736769	0.0358297503582975
ASCL1	-0.645221184794743	0.0324967503249675
ASCL4	-0.619478528061132	0.0458554144585541
ASIC3	-0.512904217420913	0.0541945805419458
ASPRV1	-0.633646069797589	0.022664400226644
ATF4	-0.639893693323954	0.0288171182881712
ATOH1	-0.677045292110999	0.0190695216192666
ATP6V1E2	-0.64110453889407	0.0249375062493751
AURKAIP1	-0.642162852582881	0.0265773422657734
AVPR1A	-0.565386131334842	0.0523747625237477
B2M	-0.587744350002504	0.0523947605239476
B3GALT1	-0.633353048710976	0.0315111346008256
B3GALT4	-0.567393234873699	0.0478952104789521
B3GALT5	-0.646808820226567	0.0174982501749825
B3GALT6	-0.570748601318727	0.0597606905976069
B3GNT2	-0.665426291760968	0.024997500249975
B3GNT7	-0.587103440269595	0.048328500483285
B3GNT8	-0.581866979882584	0.0517348265173483
B3GNT9	-0.615269787280812	0.0416958304169583
BAHD1	-0.484712696485237	0.0538279505382795
BAP1	-0.563364964849928	0.0394210578942106
BARHL2	-0.523350319632978	0.0859664033596641
BBS10	-0.55549977730884	0.0698530146985302
BBS12	-0.629233975064151	0.024017598240176
BCL6B	-0.57641413582855	0.0496550344965503
BDKRB1	-0.613357432425977	0.0345340465953405
BLCAP	-0.54656828664525	0.0772172782721727
BOLA1	-0.614001637091933	0.0459287404592874
BTBD6	-0.571664520277504	0.0296720327967203
C10orf120	-0.611997414226164	0.0365296803652968
C10orf62	-0.639703772512885	0.0258099190080992
C10orf71	-0.603966773405829	0.0270572942705729
C11orf87	-0.731484381101275	0.00713678632136786
C12orf60	-0.576710838580436	0.0626137386261373
C12orf71	-0.572921005922106	0.0458554144585541
C15orf39	-0.545878368078701	0.0578275505782755
C17orf107	-0.627680283076066	0.0280638602806386
C17orf97	-0.544491435918862	0.0417624904176249
C19orf73	-0.608521994689804	0.028663800286638
C1orf162	-0.576654321163366	0.034046595340466
C1orf210	-0.586437548628442	0.055094490550945
C1orf216	-0.604004492652662	0.0384561543845615
C1QA	-0.577839575414428	0.043995600439956
C1QB	-0.626188849196734	0.0303219678032197
C1QC	-0.505725276131592	0.0959570709595708
C2orf16	-0.592337148150664	0.0368129853681299
C2orf88	-0.683320644103016	0.0225227477252275
C3AR1	-0.582814205897636	0.0593690630936906
C5orf24	-0.621470132497801	0.0349631703496317
C6orf120	-0.627900795039296	0.0302636403026364
C6orf15	-0.607618933668254	0.0344215578442156
C8orf33	-0.587825253359191	0.0514448555144486
C8orf48	-0.645609129402211	0.0224310902243109
CABS1	-0.66678362571109	0.0225227477252275
CALHM2	-0.578324433935117	0.0382561743825617
CALML3	-0.664742618460692	0.0195813751958137
CALML5	-0.645273100994221	0.0285221477852215
CALML6	-0.554320408076541	0.0637186281371863
CAMKV	-0.604255347851863	0.030996900309969
CAPNS2	-0.61541633822998	0.0484451554844515
CAPS	-0.636225697714725	0.0207479252074792
CAPZA3	-0.608226737991772	0.0332466753324668
CBLN2	-0.590730061398467	0.0476952304769523
CCDC116	-0.591070901820765	0.0393960603939606
CCDC51	-0.577845194604733	0.0378462153784622
CCDC54	-0.671861608718285	0.0106989301069893
CCDC70	-0.713952177848118	0.00955904409559044
CCDC71	-0.620208873951307	0.0362163783621638
CCDC74B	-0.559372341042308	0.0531696830316968
CCDC8	-0.600958801187394	0.0362163783621638
CCDC96	-0.639170239867168	0.0250974902509749
CCIN	-0.592531079941935	0.0408459154084592
CCNL2	-0.491646434922554	0.0620271306202713
CCR1	-0.666662027254886	0.0236833459511192
CCR2	-0.62393568499606	0.0356821460711072
CCR3	-0.629831494438271	0.0356764323567643
CCR4	-0.641900331278631	0.0273401231305441
CCR5	-0.64626004373592	0.0229810352298104
CCR6	-0.666414546651723	0.018381495183815
CCR8	-0.662838812755427	0.0259140752591407
CCRL2	-0.63673180332131	0.0221644502216445
CD14	-0.660269011604743	0.0237976202379762
CD209	-0.510361521051265	0.0595940405959404
CD68	-0.630657977060643	0.031330200313302
CD93	-0.517054122532719	0.0973902609739026
CDC42EP4	-0.600080157588358	0.0443955604439556
CDCA4	-0.6108326537971	0.0318634803186348
CDK5	-0.479737275537662	0.0799586707995868
CDK5R1	-0.60771000575407	0.040945905409459
CDK5R2	-0.619710905892433	0.0333966603339666
CDKN2AIP	-0.595299816885478	0.0347965203479652
CDRT15	-0.651311317446448	0.0227310602273106
CEBPE	-0.625937246664996	0.0388711128887111
CELSR2	-0.481306160106806	0.0617438256174382
CELSR3	-0.523560972724669	0.0662933706629337
CENPBD1	-0.69823553681026	0.0117488251174882
CGGBP1	-0.638264768587759	0.031971802819718
CH25H	-0.617016343849781	0.0347565243475652
CHML	-0.584891721118659	0.035996400359964
CHMP1B	-0.570890892659506	0.047970202979702
CHPF	-0.591561729520508	0.0393210678932107
CHRM1	-0.686063108207106	0.0170982901709829
CHRM2	-0.521577155073438	0.171116221711162
CHRM3	-0.599606659041704	0.0365713428657134
CHRM5	-0.637217431471334	0.0278115045638293
CHRNE	-0.600762745061979	0.0371462853714628
CHRNG	-0.575420892318058	0.047970202979702
CHST1	-0.723465745050217	0.00984901509849015
CHST14	-0.592495161499042	0.0404559544045595
CHST2	-0.622478616884094	0.0345715428457154
CHST3	-0.621934301496256	0.0339216078392161
CHST4	-0.622310515362177	0.0308969103089691
CHST5	-0.645695598442722	0.0282221777822218
CHST6	-0.667143942189013	0.0231548273744054
CILP2	-0.562054060702442	0.0309302403093024
CIRBP	-0.611277158054824	0.0304636203046362
CITED2	-0.63016094683473	0.0238176182381762
CLDN12	-0.49027398565201	0.131446855314469
CLDN14	-0.708649916361143	0.0082658400826584
CLDN20	-0.606716639355485	0.0379212078792121
CLDN23	-0.607427842160522	0.0386161383861614
CLDN4	-0.439818937473913	0.209836159241219
CLDN6	-0.65241486595132	0.0285304802853048
CLDN8	-0.706723034556791	0.0087324600873246
CLDN9	-0.607399233373845	0.0505199480051995
CLEC14A	-0.640924530832783	0.0276347365263474
CLEC4G	-0.554857570503919	0.0316301703163017
CMKLR1	-0.63776548224745	0.0272306102723061
CNR1	-0.672332833732109	0.0166983301669833
CNR2	-0.617522067993103	0.0334591540845915
COL8A2	-0.554808831287214	0.0605606106056062
COMMD5	-0.690105365603523	0.0116238376162384
COX7B2	-0.750442195362755	0.0041995800419958
CPN2	-0.616370115953136	0.0322634403226344
CPSF1	-0.510258741606447	0.0698180181981802
CREBZF	-0.67633333381608	0.0088657800886578
CRYGC	-0.619737746950765	0.0331966803319668
CSNK1A1L	-0.657154519789233	0.0664933506649336
CSRNP1	-0.561374258302888	0.0447955204479552
CSTF2T	-0.623883735243206	0.0294220577942206
CTAGE1	-0.589636537661225	0.0374248289456769
CTAGE9	-0.60165027464067	0.0428157184281572
CTXN3	-0.670275547447694	0.01666500016665
CXCL1	-0.651555726280494	0.0247641902476419
CXCR1	-0.67238190307225	0.0158206401582064
CXCR2	-0.677356574922966	0.0172697016012684
CXCR4	-0.586023691329397	0.0419358064193581
CXCR6	-0.58699294050798	0.045995400459954
CXXC1	-0.596477473378087	0.0511948805119488
CXXC5	-0.587380304529595	0.0467286604672866
CYCS	-0.388382664623271	0.266473352664734
CYP1A1	-0.613222938957376	0.041970802919708
CYP1A2	-0.515206257681806	0.0399626703996267
CYP26A1	-0.613760081819446	0.0438289504382895
CYP27B1	-0.501913477542321	0.0509615705096157
CYP8B1	-0.676266079908945	0.0138557572814147
CYSLTR2	-0.70922275232991	0.0101823151018231
DALRD3	-0.603234198804128	0.0228727127287271
DAXX	-0.597303038012058	0.0281638502816385
DCAF16	-0.696991030389137	0.0163183681631837
DCAF4L1	-0.668840042667047	0.0133361663833617
DCAF4L2	-0.610843401831897	0.0371712828717128
DDI1	-0.745697960990437	0.0037996200379962
DDIT4	-0.659981729121671	0.0188731126887311
DDN	-0.559762131777093	0.044662200446622
DDX28	-0.578985846755013	0.0474952504749524
DEFA4	-0.559058915059362	0.0603739626037396
DEFB126	-0.514881931572292	0.0820917908209181
DEFB136	-0.580850989149106	0.0546945305469453
DEXI	-0.613174408027006	0.04332900043329
DIO3	-0.652008911839077	0.029009599040096
DIRAS1	-0.683705096116219	0.0136153051361531
DIRAS2	-0.650365701070996	0.0277805552778056
DIRAS3	-0.654689858129182	0.0234101589841016
DISP2	-0.479194370743591	0.0806169383061694
DLX5	-0.369502243229014	0.256424357564244
DMRTA2	-0.538531019199918	0.0598273505982735
DNAJB7	-0.636916530455586	0.0317134953171349
DNAJC28	-0.674943802137464	0.0143985601439856
DNAJC30	-0.541138733380398	0.0746592007465919
DNAJC5	-0.510236292344074	0.127867213278672
DOK2	-0.508287019453963	0.0662433756624338
DOLK	-0.575989519146342	0.0360963903609639
DPEP3	-0.504579975413586	0.0667266606672666
DPH2	-0.585346209046473	0.051034896510349
DPPA5	-0.604278256631339	0.0460120654601206
DRD1	-0.648786945116318	0.0270401531275444
DRD5	-0.727968327797741	0.00752781864670676
DSEL	-0.671189967103016	0.0192980701929807
DTX3	-0.560081423588846	0.0439622704396227
DUOXA1	-0.52930384581911	0.064226910642269
DUOXA2	-0.58741461828764	0.0415208479152085
DUSP18	-0.689690044884032	0.0102656401026564
DUSP6	-0.564287254736133	0.041945805419458
EBLN2	-0.6120831526944	0.0348465153484651
ECEL1	-0.543042226536865	0.051974802519748
EDDM3A	-0.646815895419011	0.027663900276639
EEF1A1	-0.628731708447575	0.0244142252441422
EGR1	-0.587539411279827	0.0472809861870956
EGR2	-0.656999924674063	0.0227377262273773
EGR3	-0.589233337614512	0.0498950104989501
EID1	-0.645032125246134	0.0331716828317168
EID3	-0.576883805145103	0.0513698630136986
ELFN2	-0.649435676689888	0.020331300203313
ELL3	-0.561808842860658	0.0591940805919408
ELOF1	-0.644988982901999	0.0262473752624737
ENC1	-0.634329214651583	0.0339823160541089
EOMES	-0.559959888941301	0.0550544945505449
EPHB6	-0.465732100370885	0.0879112088791122
EPM2AIP1	-0.658260632291523	0.0201979802019798
ERV3-1	-0.550057979021302	0.0582941705829416
ERVW-1	-0.408856014524719	0.2997700229977
FAM167B	-0.562151618074407	0.0606939306069393
FAM217B	-0.506916377456161	0.0882661733826618
FAM220A	-0.353150240669893	0.357197613571976
FAM24A	-0.602741280256563	0.0374462553744625
FAM43B	-0.564406774962502	0.0674682531746825
FAM50B	-0.626403513594149	0.0308219178082192
FAM71C	-0.608089423991051	0.0424957504249575
FBXL6	-0.583966243898728	0.0461953804619538
FBXO34	-0.593713985291001	0.0518281505182815
FBXO46	-0.584614930360141	0.0451204879512049
FBXO48	-0.578678624605488	0.0520947905209479
FEM1A	-0.576667945320046	0.0431356864313569
FEZF1	-0.530724097716037	0.0950904909509051
FEZF2	-0.621175621287192	0.0312218778122188
FFAR3	-0.607736875474863	0.04003599640036
FGA	-0.645009419970457	0.0256724327567243
FGFBP1	-0.659856128972743	0.0207312602073126
FGFBP2	-0.677193250525	0.0188981101889811
FGFBP3	-0.575231098032765	0.0488284504882845
FHL3	-0.548516706915177	0.0589607705896077
FIBIN	-0.70830126239605	0.005666100056661
FICD	-0.550200216686889	0.0393627303936273
FKBPL	-0.629732325323807	0.0301369863013699
FLG	-0.557119564998448	0.0413558644135586
FLRT2	-0.67962289159071	0.0174232576742326
FLRT3	-0.466135841752256	0.167583241675832
FNDC9	-0.650213253552864	0.0269139752691397
FOXA1	-0.611235007411213	0.0211312202113122
FOXB1	-0.606512949781139	0.0436456354364564
FOXB2	-0.602872462258722	0.0454621204546212
FOXC2	-0.617935081896832	0.0370562943705629
FOXD2	-0.561286081855908	0.0620687931206879
FOXD3	-0.593890215985945	0.0463153684631537
FOXD4	-0.687786900534699	0.0151484851514849
FOXD4L1	-0.646708349028432	0.0241475852414758
FOXE1	-0.594964183589324	0.0427557244275572
FOXE3	-0.60457350282232	0.0377462253774623
FOXF1	-0.592409584846073	0.0420624604206246
FOXG1	-0.657363950702812	0.021112174496836
FOXH1	-0.608209695221752	0.0406530775493879
FOXI1	-0.629100513391679	0.0263098690130987
FOXI2	-0.64464026926427	0.0265473452654734
FOXL1	-0.632056636260029	0.0328167183281672
FOXQ1	-0.632970472275105	0.0272639402726394
FOXS1	-0.609688799659238	0.0481951804819519
FPR1	-0.637696565681947	0.0245350464953505
FPR2	-0.641110442606911	0.0215853414658534
FPR3	-0.633996114833337	0.0281371862813719
FRG2B	-0.686204051955466	0.0126737326267373
FTL	-0.549403963095363	0.0704429557044295
FUT1	-0.63489457076758	0.0203146352031464
FUT2	-0.614425754372208	0.034663200346632
FUT3	-0.640807027242377	0.0309135753091357
FUT5	-0.6462571576519	0.0277472252774723
FUT6	-0.621373643994496	0.0350798253507982
FUT9	-0.683370636152129	0.0156609339066093
FZD1	-0.460809058993889	0.198763456987635
FZD10	-0.659030076418719	0.0237851214878512
FZD2	-0.609394533544563	0.0414791854147918
FZD5	-0.633153793327058	0.0360713928607139
FZD7	-0.625885207975496	0.0282721727827217
FZD8	-0.607692157528273	0.0311302203113022
FZD9	-0.425462647236357	0.257507582575076
GABRD	-0.52883024050762	0.0606272706062727
GALNT4	-0.601203367504015	0.045035496450355
GAPT	-0.644590693029876	0.030330300303303
GAST	-0.62348106461467	0.036971302869713
GBX2	-0.601931269561299	0.0450954904509549
GCNT1	-0.644057239149766	0.0314768523147685
GCNT3	-0.610842586393035	0.0365963403659634
GCNT4	-0.628659006816448	0.0302303103023031
GDF9	-0.581150296783796	0.0488451154884511
GDPGP1	-0.622935933000557	0.0294170582941706
GEMIN4	-0.528996108368872	0.0526447355264473
GEMIN7	-0.611331901589338	0.0409292404092924
GGTLC1	-0.492051016191737	0.117463253674633
GIMAP1	-0.507815059642542	0.114055261140553
GIMAP4	-0.508270870524292	0.0896160383961603
GIMAP5	-0.523426039093889	0.0575609105756091
GIMAP6	-0.523239696309941	0.0711928807119288
GIMAP7	-0.510700192649487	0.144552211445522
GJA1	-0.702772003375441	0.0104322901043229
GJA10	-0.703410904063653	0.0125987401259874
GJA4	-0.639412608586323	0.0312968703129687
GJA5	-0.612161178502964	0.0384294903842949
GJA8	-0.64227538602064	0.0163983601639836
GJA9	-0.585335943143066	0.0470452954704529
GJB2	-0.703537171083646	0.0115655101156551
GJB3	-0.634867317048587	0.0332966703329667
GJB4	-0.684956802559317	0.0166858314168583
GJB5	-0.627102641780963	0.0323467653234676
GJB6	-0.663775163386619	0.0172316101723161
GJB7	-0.700661615409889	0.0137236276372363
GJC1	-0.615803952859218	0.036036396360364
GJD2	-0.621734163102228	0.0277257988486866
GLTPD2	-0.599418617279833	0.0504949505049495
GNG13	-0.649677642420037	0.0236976302369763
GP1BA	-0.621521309426331	0.0349131753491317
GPBAR1	-0.644488775020169	0.0243375662433757
GPR1	-0.636822026381797	0.0331252589026812
GPR12	-0.648500992584408	0.0870055851557702
GPR141	-0.445572474186322	0.20972902709729
GPR148	-0.641734983852722	0.0279222077792221
GPR15	-0.683195973151921	0.0135986401359864
GPR151	-0.605807846826214	0.0357964203579642
GPR17	-0.593338476390913	0.038667561815247
GPR182	-0.584917304635135	0.05001499850015
GPR21	-0.63814055502606	0.0347565243475652
GPR22	-0.456812936673626	0.209995667099957
GPR27	-0.628093689432373	0.0341565843415658
GPR3	-0.634407063419568	0.031956804319568
GPR31	-0.669647782564858	0.0256974302569743
GPR4	-0.621488557812044	0.0339466053394661
GPR45	-0.680198175311685	0.0136541901365419
GPR55	-0.706886091047734	0.0124237576242376
GPR6	-0.698663804131496	0.0129487051294871
GPR61	-0.665088013245819	0.0229810352298104
GPR62	-0.582748756146537	0.0508949105089491
GPR63	-0.691500048311538	0.0162555173054123
GPR65	-0.678155823343363	0.015998400159984
GPR75	-0.596065406677423	0.0445755424457554
GPR84	-0.588873648406894	0.0462287104622871
GPR85	-0.511817878919721	0.122387761223878
GPR88	-0.579668200081044	0.0540612605406126
GPRIN1	-0.588516999845582	0.0420624604206246
GPRIN2	-0.659196357805471	0.019553600195536
GPRIN3	-0.660813757698217	0.0145271187166998
GPT	-0.579717102988745	0.0554658819832301
GPX1	-0.675841753463539	0.0213645302136453
GREM1	-0.695871179164643	0.0128820451288205
GREM2	-0.59468348154106	0.0604339566043395
GRM2	-0.510330498209164	0.0622271106222711
GSTM5	-0.553563570817933	0.061018898110189
GSX2	-0.613949293941804	0.0343632303436323
HAND2	-0.63730715406603	0.0221811152218112
HBA1	-0.597690969929393	0.037329600373296
HBA2	-0.621997534351223	0.0413791954137919
HBG2	-0.693679032113954	0.0133736626337366
HBM	-0.627617983604795	0.0446455354464554
HBQ1	-0.616450530216457	0.0315301803153018
HCAR1	-0.609341131651223	0.0316718328167183
HCAR2	-0.614948970192298	0.0380676218092476
HCAR3	-0.610540872191327	0.041995800419958
HDAC10	-0.560213034717505	0.0382295103822951
HDHD3	-0.607658988778489	0.0527697230276973
HELT	-0.602399343512557	0.041329200413292
HES4	-0.629733390690274	0.0307219278072193
HESX1	-0.586352243700353	0.0487284604872846
HEXIM1	-0.618355417767747	0.0348465153484652
HIGD2A	-0.589451548799344	0.0476452354764524
HIRIP3	-0.566998671225676	0.0359630703596307
HLA-B	-0.616315881321996	0.0342465753424658
HMGB2	-0.591472550054513	0.0289304402893044
HMGB4	-0.693431384091929	0.0151984801519848
HMGN4	-0.659949346685968	0.0263973602639736
HMX2	-0.613764745081255	0.0326967303269673
HMX3	-0.625370103481602	0.0339466053394661
HNRNPA0	-0.60101970870468	0.0422291104222911
HNRNPA1L2	-0.694835214112769	0.0102489751024897
HNRNPCL1	-0.703737052371536	0.0132111788821118
HNRNPF	-0.633434721233611	0.0280829059951148
HOXA1	-0.447453088524115	0.212138786121388
HOXA3	-0.505891276639544	0.0819251408192513
HOXA4	-0.449447758715279	0.26987301269873
HOXA7	-0.418811275592014	0.264106922641069
HOXB1	-0.581665066762024	0.0514448555144486
HOXB3	-0.573231005207667	0.043970602939706
HOXB5	-0.588930685523888	0.0421707829217078
HOXC11	-0.564643708471414	0.0482151784821518
HOXC12	-0.588448875972319	0.0284971502849715
HOXC4	-0.595716683771812	0.0417558244175582
HOXC5	-0.533129903330302	0.0790920907909208
HOXC6	-0.600577414694976	0.0362630403626304
HOXD10	-0.575904085018328	0.0471152884711529
HOXD12	-0.652044257200516	0.0299220077992201
HOXD13	-0.59361995824925	0.0368163183681632
HOXD3	-0.545856592487588	0.0511948805119488
HOXD4	-0.602512883768741	0.0366363363663634
HOXD8	-0.581098713476386	0.0500199980002
HOXD9	-0.580706664101776	0.0509282405092824
HPDL	-0.589635389415685	0.046015398460154
HPS6	-0.673073870676216	0.0179315401793154
HRC	-0.498941538889498	0.06001899810019
HRCT1	-0.582267365561235	0.0504949505049494
HRH1	-0.625151465126102	0.0322967703229677
HRH2	-0.597707495814634	0.0360630603606306
HS3ST1	-0.700666333872031	0.0130701215592726
HS3ST5	-0.52299780372472	0.0523947605239476
HSPA1L	-0.651941234627879	0.0256974302569743
HSPA2	-0.616154947549284	0.0385675718142471
HSPA8	-0.603115823116554	0.0207379262073793
HSPB3	-0.677934342992675	0.0169383061693831
HTR1A	-0.715032397241069	0.00777422257774223
HTR1B	-0.693559330362496	0.0103132543888468
HTR1D	-0.619827292920096	0.0341132553411325
HTR1E	-0.727218422227531	0.0106560772494179
HTR1F	-0.682080839633527	0.0155698715842701
HUS1B	-0.713355074685179	0.00933656634336566
HYAL1	-0.587260904679859	0.0302969703029697
HYPK	-0.569194489124009	0.0562743725627436
ID1	-0.441342514689963	0.153134686531347
ID2	-0.646509093061606	0.0224977502249775
ID3	-0.66392346797857	0.0274722527747225
IER2	-0.667873359599739	0.0214645202146452
IFITM5	-0.680615491154859	0.0138986101389861
IFNA1	-0.619822369434238	0.0401209879012099
IFNA21	-0.654609201495339	0.0251574842515748
IFNA5	-0.669230985657666	0.0194313901943139
IFNB1	-0.660462465157948	0.025997400259974
IFNE	-0.612464806159303	0.0442955704429556
IFRD2	-0.53446689276511	0.0647268606472686
IGIP	-0.724938860172937	0.00951904809519048
IL17C	-0.621933401459493	0.0267223277672233
IMP3	-0.675116103574083	0.0245975402459754
INHA	-0.562958112926048	0.0378962103789621
INHBE	-0.539318515007338	0.0890244308902444
IQCC	-0.521629058914966	0.0888244508882446
IQCF6	-0.717817379601249	0.0071326200713262
IRF2BP1	-0.596749129502152	0.0355297803552978
IRGC	-0.63183843400484	0.0361963803619638
IRS1	-0.613924714795764	0.0250849915008499
IRX1	-0.535292337692627	0.0601939806019398
IRX5	-0.589445124190967	0.0591940805919408
ISG15	-0.60793495785883	0.0391960803919608
ISLR	-0.656988779059571	0.0223120545088348
ISLR2	-0.63464922748181	0.0249086202490862
ITPRIP	-0.638401604677682	0.0270139652701397
JUNB	-0.631604740142422	0.0345215478452155
KAAG1	-0.721185892918402	0.0154484551544846
KCNA1	-0.626606645725384	0.0303969603039696
KCNA10	-0.666278125904944	0.0236547773794049
KCNA3	-0.662274288288702	0.027997200279972
KCNA4	-0.741787013128753	0.00498700129987001
KCNA5	-0.647862912774875	0.0213811952138119
KCNA7	-0.557047401314933	0.0515281805152818
KCNE1	-0.730240809583212	0.0087324600873246
KCNE3	-0.721045339055627	0.0142652401426524
KCNE4	-0.671519552707704	0.0202146452021465
KCNF1	-0.665102336071073	0.0194147251941473
KCNJ11	-0.652272800133677	0.0177982201779822
KCNJ12	-0.783594121048513	0.00198730126987301
KCNJ13	-0.594866501557645	0.0390960903909609
KCNJ15	-0.695856618197661	0.0101989801019898
KCNJ16	-0.593353542198028	0.041995800419958
KCNJ2	-0.624182577072086	0.0327967203279672
KCNJ4	-0.671376120937268	0.0170268687416973
KCNS2	-0.586452003794833	0.0399293403992934
KCNS3	-0.636060403212433	0.0296970302969703
KDM6B	-0.566635733721842	0.0498950104989501
KEAP1	-0.646496560910789	0.0284971502849715
KHDC1	-0.601914751521059	0.0458287504582875
KHDC1L	-0.582000177763849	0.050661600506616
KHDC3L	-0.648537571217355	0.0237776222377762
KIF4B	-0.651753587272269	0.0194202801942028
KIFC2	-0.541500651179257	0.0785754757857548
KLF14	-0.408126442483105	0.246135386461354
KLHDC7A	-0.614933056499378	0.0311857703118577
KLHDC7B	-0.649935993035542	0.0279829159941149
KLHL17	-0.570458966988428	0.041035896410359
KLHL25	-0.61512519482683	0.0302969703029697
KLHL9	-0.566783422930089	0.0548278505482786
KLLN	-0.620043137992396	0.0306302703063027
KPRP	-0.600784000627802	0.0340715928407159
KRBA2	-0.566624418805182	0.0374462553744625
KRCC1	-0.597406712030531	0.0414958504149585
KRT1	-0.488578090620335	0.0854664533546646
KRT31	-0.528910299927355	0.038996100389961
KRT36	-0.533935443983258	0.0346298703462987
KRT37	-0.56490050832105	0.0535746425357464
KRT6B	-0.543830049663528	0.0499200079992001
KRT85	-0.441345143295992	0.0723261007232612
KRTAP1-3	-0.676764294988075	0.0188981101889811
KRTAP1-5	-0.605967464633692	0.0386211378862114
KRTAP11-1	-0.774547854689621	0.00407959204079592
KRTAP13-2	-0.766359483236916	0.00607439256074392
KRTAP17-1	-0.590007163940212	0.0416958304169583
KRTAP19-1	-0.708411159251036	0.0065993400659934
KRTAP19-3	-0.824254060983623	0.0012332100123321
KRTAP19-8	-0.730373920447698	0.0098990100989901
KRTAP20-2	-0.81784199955924	0.0020331300203313
KRTAP21-2	-0.731313598887567	0.007999200079992
KRTAP3-2	-0.585303113749751	0.0452288104522881
KRTAP4-6	-0.697028467823232	0.0138986101389861
KRTAP5-1	-0.689158470074112	0.0153984601539846
KRTAP5-2	-0.705343592367259	0.011048895110489
KRTAP5-5	-0.708541161607193	0.0139486051394861
KRTAP5-6	-0.687805098104405	0.0138986101389861
KTI12	-0.626437200745727	0.0289685317182567
L1TD1	-0.513991030589451	0.076042395760424
LAMB2	-0.515455705387198	0.0635186481351865
LBX1	-0.624778608460567	0.0297720227977202
LCE1A	-0.600584882398133	0.0617938206179382
LCE3D	-0.604777476469879	0.0468286504682865
LCMT2	-0.63819456114374	0.0260473952604739
LDHAL6B	-0.66012308271272	0.0258640802586408
LIG4	-0.612045484619712	0.0237976202379762
LILRA6	-0.549634108524439	0.0565193480651935
LILRB1	-0.567306251886951	0.0463667918922393
LILRB4	-0.557553788464435	0.0792254107922542
LIME1	-0.572326125666799	0.0615938406159384
LINGO2	-0.656656750967416	0.0202479752024797
LINGO3	-0.622606222963704	0.0347631903476319
LIPT1	-0.642601652766398	0.0143985601439856
LMF2	-0.596786012253614	0.0361563843615638
LPAR5	-0.602313032545594	0.0372962703729627
LPAR6	-0.579367406213329	0.102039796020398
LRG1	-0.591902184370062	0.0437356264373563
LRRC14	-0.58513749025743	0.0443384233005271
LRRC14B	-0.583383077816673	0.044328900443289
LRRC18	-0.573459420105683	0.0384711528847115
LRRC24	-0.556524944764618	0.0622137786221378
LRRC3	-0.701058494243649	0.0055327800553278
LRRC30	-0.673168283251774	0.0177482251774823
LRRC3B	-0.679222066537589	0.0178267887496965
LRRC4	-0.540628149695074	0.0617938206179381
LRRC4C	-0.715155730447061	0.00846165383461654
LRRC61	-0.409497644884236	0.306402693064027
LRRC70	-0.600454180932415	0.0399626703996267
LRRC8D	-0.592854870296814	0.0380795253807953
LRRN1	-0.642356639825191	0.0208979102089791
LRRN3	-0.53457424108325	0.0728093857280939
LRRTM1	-0.701013992906752	0.0132486751324868
LRRTM2	-0.575158955898159	0.0429623704296237
LSM10	-0.619055522472548	0.0371962803719628
LTA	-0.591558136859216	0.048995100489951
LTB4R	-0.676806302214388	0.0168983101689831
LTB4R2	-0.613333493395704	0.0247641902476419
LUM	-0.546965649201995	0.0538612805386128
LUZP1	-0.551291555344624	0.0584541545845415
LYPLA2	-0.563939327447432	0.0584941505849416
MAB21L1	-0.647795289162325	0.090990900909909
MAB21L2	-0.716302243122626	0.0091990800919908
MAP1A	-0.620228587265288	0.0285221477852215
MAP1LC3B2	-0.642685965918049	0.0247375262473753
MAP3K12	-0.563016125569207	0.0765256807652568
MARCKSL1	-0.59161748817434	0.0442289104422891
MARS2	-0.597244385515027	0.043552787578385
MAS1L	-0.623268261700314	0.0258974102589741
MBD3L1	-0.645463675904611	0.0373629303736293
MBD6	-0.546100806975871	0.0449288404492884
MBLAC1	-0.461118490406042	0.265906742659067
MC1R	-0.716496141110822	0.0098656800986568
MC2R	-0.708987951548451	0.0132986701329867
MC3R	-0.563523737409075	0.0689431056894312
MC4R	-0.6728056712577	0.0168358164183582
MC5R	-0.650021783671798	0.0282846715328467
MCHR1	-0.607140767318982	0.0463953604639536
MED11	-0.589543432022735	0.032996700329967
MED7	-0.634512482956196	0.0282471752824718
MESP2	-0.56592597968092	0.0552944705529447
MEX3B	-0.571844015164494	0.0570276305702763
MFSD3	-0.605200237991066	0.0380961903809619
MFSD6L	-0.625067234488676	0.028325738854686
MGAT1	-0.629642933048288	0.0304826660191124
MGAT3	-0.667887530311226	0.0275472452754724
MIB2	-0.513234781191318	0.0728593807285938
MIS12	-0.66308005760464	0.0218978102189781
MKRN3	-0.73573885609447	0.00802419758024198
MOAP1	-0.645505279494622	0.0250474952504749
MOCS3	-0.490278307297914	0.11052894710529
MOGS	-0.579587414479311	0.0464953504649535
MRFAP1	-0.685579509900002	0.0155317801553178
MRFAP1L1	-0.668953908135432	0.0188981101889811
MRGPRX1	-0.754866297793754	0.0039329400393294
MRGPRX3	-0.726185356711931	0.0082325100823251
MRGPRX4	-0.671885017666169	0.0127987201279872
MRPL28	-0.549839359952316	0.0496950304969503
MRPL53	-0.623017086136666	0.0347165283471653
MSGN1	-0.680605174236616	0.0158584141585841
MST1	-0.555500083744954	0.0407959204079592
MST1R	-0.488702875151805	0.0632186781321868
MXRA8	-0.548957854144276	0.0706679332066793
MYADM	-0.631221155837908	0.0286971302869713
MYF5	-0.640829727936843	0.0195647101956471
MYF6	-0.653364518226362	0.0206836459211222
MYH1	-0.600399071509184	0.0348298503482985
MYH4	-0.550434515334308	0.0436206379362064
MYH8	-0.568039969801889	0.0491950804919508
MYT1	-0.443210860819668	0.14018598140186
N4BP3	-0.57619427013574	0.0377462253774623
NAA11	-0.724072056011523	0.00691359435485023
NACA2	-0.643920978181513	0.0281971802819718
NANOS2	-0.628526285603336	0.0329633703296337
NAP1L5	-0.641481393342135	0.0267373262673733
NAT2	-0.607485003541181	0.0486551344865514
NAT8	-0.656557352837542	0.0228177182281772
NDN	-0.734486943422581	0.00664933506649335
NDUFAF3	-0.593925780476055	0.0435623104356231
NEFM	-0.562867082302196	0.0599654320282257
NEU2	-0.631564835813982	0.0348365163483652
NEU4	-0.594278528020955	0.028997100289971
NEUROD1	-0.663118391255376	0.0211178882111789
NEUROD4	-0.613506740579519	0.036329700363297
NEUROG2	-0.685233175064079	0.0183148351831484
NEUROG3	-0.675977317357923	0.0178982101789821
NFIL3	-0.587159556661628	0.0518281505182815
NGF	-0.692716940798276	0.0165761201657612
NHLH1	-0.614902512909434	0.0307302603073026
NHLH2	-0.679902596541936	0.0216578342165783
NHLRC4	-0.66178285243859	0.0325634103256341
NKAPL	-0.666277660488962	0.0178267887496965
NKG7	-0.640578706658827	0.0214378562143786
NKX2-2	-0.49120316843372	0.10988901109889
NKX2-5	-0.590033486305672	0.0337632903376329
NKX6-2	-0.6730182627911	0.0232643402326434
NMUR1	-0.580827918501827	0.0474202579742026
NPAP1	-0.667274285480593	0.0115988401159884
NPBWR2	-0.712347776975789	0.0067993200679932
NPM3	-0.598035692857686	0.0246975302469753
NPPB	-0.601609153587022	0.0396960303969603
NPY1R	-0.698515625241852	0.0080991900809919
NPY2R	-0.722863306904867	0.00951571509515715
NPY5R	-0.742902179801232	0.00665647720942191
NR2C2AP	-0.62878431168577	0.0300303303003033
NRN1L	-0.592007855078907	0.0394360563943606
NRSN2	-0.495079034128559	0.114938506149385
NSUN5	-0.449945676127732	0.0726260707262606
NTF4	-0.586600512439134	0.0524147585241477
NUP62	-0.595515115434387	0.0349798353497984
OBSL1	-0.473916377053648	0.07665900076659
OLFML3	-0.590560867971339	0.0458704129587041
OLIG3	-0.660399343012255	0.0210778922107789
OMP	-0.688334423841079	0.0141985801419858
OOEP	-0.639166590661793	0.0316968303169683
OPRL1	-0.534231178359251	0.0640824806408248
OR10A2	-0.704621195241626	0.0133786621337866
OR10A3	-0.723207912354499	0.00735926407359264
OR10AD1	-0.655651094155975	0.0206979302069793
OR10G2	-0.646783338857983	0.0192314101923141
OR10G4	-0.684977359944382	0.0056327700563277
OR10H1	-0.674826950396781	0.0210836059251218
OR10H5	-0.632123767300222	0.0345298803452988
OR10Q1	-0.721643684973901	0.00862413758624138
OR10S1	-0.749724137140559	0.0076325700763257
OR11H4	-0.644608923092782	0.0298970102989701
OR13A1	-0.712898624154365	0.00881578508815785
OR13D1	-0.667204961868359	0.018948105189481
OR13G1	-0.713021068149383	0.0062660400626604
OR14A16	-0.856324011593546	0.0007999200079992
OR1E2	-0.694435305232491	0.0100989901009899
OR1F1	-0.609046086830966	0.0421291204212912
OR1G1	-0.650371206246805	0.0223644302236443
OR1J1	-0.641306367517261	0.0248175182481752
OR1J2	-0.649382254757236	0.0267973202679732
OR1J4	-0.638751767107567	0.0392960703929607
OR1K1	-0.600572923796553	0.0508663419372348
OR1L3	-0.60949736077352	0.0422457754224577
OR1L6	-0.614879114380118	0.0347631903476319
OR1L8	-0.632455914175626	0.0358107046438213
OR1M1	-0.69333930903783	0.0176982301769823
OR1N1	-0.658719760573318	0.0309683317382547
OR1N2	-0.647114098149191	0.0305344465553445
OR1Q1	-0.616080289754429	0.048895110488951
OR2A1	-0.404536193247832	0.291195880411959
OR2A14	-0.542155398479168	0.0929573709295737
OR2A2	-0.561725539377678	0.101039896010399
OR2A25	-0.518097258566634	0.155284471552845
OR2A4	-0.641857776597611	0.0245975402459754
OR2A7	-0.534285498191105	0.118938106189381
OR2AE1	-0.361909272576901	0.328392160783922
OR2AG2	-0.711368604018753	0.00908480580513377
OR2B11	-0.585995806163093	0.0391210878912109
OR2B2	-0.643072263210227	0.020664600206646
OR2B6	-0.610424662392732	0.04143871327153
OR2C1	-0.601621347599234	0.0474238290456668
OR2D3	-0.689159080345821	0.0103739626037396
OR2H2	-0.624709238722902	0.0345132153451322
OR2J3	-0.591380849199141	0.048661800486618
OR2K2	-0.617393018399092	0.0313768623137686
OR2L13	-0.807588429166352	0.00143735626437356
OR2L2	-0.771323037164528	0.00605653720342251
OR2L3	-0.750039368950846	0.00162483751624838
OR2T10	-0.753818241877836	0.0083658300836583
OR2T33	-0.746857562648951	0.00182481751824818
OR2T8	-0.764866957804872	0.00503699630036996
OR2W3	-0.82252334159167	0.001999800019998
OR3A1	-0.723320166043344	0.00893910608939106
OR3A2	-0.70129200915185	0.0121273586927022
OR3A3	-0.651170296471109	0.0266773322667733
OR4C6	-0.772358761146925	0.00598511577413687
OR51B2	-0.774418485749749	0.0043662300436623
OR51B4	-0.71410770350296	0.0087991200879912
OR51B5	-0.732527428153987	0.0070992900709929
OR51B6	-0.686610924391532	0.0130986901309869
OR51E1	-0.692523852239513	0.0108560572514177
OR51E2	-0.744249044050749	0.004999500049995
OR51I1	-0.702829224775407	0.00645935406459354
OR51I2	-0.703908253770302	0.0099656700996567
OR51M1	-0.749338772966737	0.00437456254374563
OR51Q1	-0.735198241423569	0.00901909809019098
OR52B2	-0.730385058722113	0.0039662700396627
OR52D1	-0.691866397745195	0.00898243508982435
OR52E2	-0.78598911815838	0.0028330500283305
OR52E8	-0.75821223944551	0.0050994900509949
OR52K1	-0.724507145123289	0.0097656900976569
OR52K2	-0.732560536316843	0.00742425757424258
OR52L1	-0.722527226714871	0.0091657500916575
OR52N1	-0.685431598576052	0.0138652801386528
OR52N2	-0.732949816382371	0.00741925807419258
OR52N4	-0.735608858924745	0.0085991400859914
OR52W1	-0.683974042107826	0.0132320101323201
OR56A3	-0.749560398438924	0.00607939206079392
OR56B4	-0.73071617286733	0.0044995500449955
OR5B12	-0.702308250324901	0.0113988601139886
OR5B21	-0.681436864883783	0.0112655401126554
OR5C1	-0.658989506593261	0.0221727827217278
OR5K2	-0.656229565260973	0.0224227577242276
OR5M11	-0.707288652459652	0.0101561272444184
OR5P2	-0.725319736057134	0.00684931506849315
OR5P3	-0.69889218582455	0.0127987201279872
OR6A2	-0.694096634668189	0.0100323301003233
OR6B2	-0.682736818984723	0.0108989101089891
OR6B3	-0.725874000614978	0.0116738326167383
OR6F1	-0.701737219820824	0.0039662700396627
OR6K3	-0.550158209212783	0.0542945705429457
OR6S1	-0.645773668372094	0.0256574342565743
OR6T1	-0.746350595573624	0.0041995800419958
OR7A5	-0.677996429722334	0.0129653701296537
OR7C1	-0.624851450722457	0.0384761523847615
OR7D2	-0.665700626028657	0.0277686517062579
OR8A1	-0.678088271318395	0.0160983901609839
OR8D1	-0.698923294152224	0.010332300103323
OR9A2	-0.480484447202916	0.175882411758824
OR9A4	-0.492979141562801	0.172582741725827
OSR1	-0.593683248004581	0.0422957704229577
OTOS	-0.614965471649893	0.0392160783921608
OXCT2	-0.598945751505368	0.045612105456121
OXER1	-0.644419042201504	0.0295303802953038
OXGR1	-0.665803634940432	0.0160983901609839
OXSM	-0.553046721135161	0.0515948405159484
OXT	-0.49522878513762	0.119654701196547
P2RX2	-0.627475364799225	0.0319301403193014
PABPC3	-0.630437531724795	0.0896481780393389
PAQR7	-0.613887131482432	0.0425790754257908
PAQR8	-0.639356114264237	0.0335966403359664
PARS2	-0.607055037714349	0.0432290104322902
PBOV1	-0.627983687182461	0.0417291604172916
PCBP1	-0.630850946805177	0.0305569443055694
PCDH18	-0.600505431242411	0.0320301303203013
PCDH20	-0.603161053518885	0.130906909309069
PCDH8	-0.645868026385976	0.0195730426957304
PCED1B	-0.608530604368437	0.038612805386128
PDE12	-0.556267313473664	0.044955504449555
PDIA2	-0.58956705429758	0.0460703929607039
PDP2	-0.586578674055741	0.0524147585241476
PDYN	-0.457890071385836	0.127520581275206
PEG10	-0.467751666346248	0.204093876326653
PEG3	-0.588976177699038	0.0531613505316135
PELO	-0.598144157422476	0.041035896410359
PER1	-0.557685897950988	0.0514615205146152
PF4V1	-0.632220625792063	0.0236976302369763
PGBD2	-0.601881772552131	0.0343394232005371
PGBD4	-0.617990061389119	0.0372391332295342
PGK2	-0.628795193690491	0.0352536174953933
PHF23	-0.566671437637506	0.0397626903976269
PHLDA1	-0.578932682736858	0.0572342765723428
PHOSPHO2	-0.620097854657788	0.035046495350465
PIGQ	-0.542339240299307	0.0678598806785987
PIRT	-0.712365676497956	0.0114845658291314
PKDREJ	-0.636631818779247	0.0285804752858047
PLEKHN1	-0.550098863029654	0.0697263606972636
PLN	-0.716900233419942	0.0163733626637336
PLXNB2	-0.573950985715082	0.0367629903676299
PMCH	-0.609549125892046	0.0411387432685303
PNMA1	-0.607536575982561	0.0361963803619638
PNMA2	-0.63006024514566	0.0313768623137686
POP7	-0.555609196978714	0.0736593007365929
POPDC3	-0.566407849328411	0.0481701829817018
POTEG	-0.570153189119997	0.0597940205979402
POU3F2	-0.641236954750904	0.0265806752658067
POU3F3	-0.584838886797965	0.0478452154784521
POU4F3	-0.669245501890926	0.0161840958761267
PPBP	-0.640946633369269	0.0274472552744725
PPIAL4A	-0.589956515192224	0.0593340665933407
PPIAL4G	-0.596733177035232	0.043020697930207
PPP1R16A	-0.527647410564995	0.0840082658400826
PPP1R26	-0.554715815896495	0.0516948305169483
PPP1R35	-0.53103830726146	0.0665600106656001
PPP1R3B	-0.566035548635145	0.0580370534375134
PPP3R2	-0.73735875629134	0.0061993800619938
PRAMEF12	-0.591495301443724	0.0492950704929508
PREB	-0.544963548464468	0.0399293403992934
PRF1	-0.633843012633488	0.0311168883111689
PRLH	-0.602700782517589	0.0417708229177082
PRLHR	-0.700008512432835	0.00935906409359064
PRM2	-0.640091669612739	0.0275639102756391
PRMT6	-0.622364599122279	0.0325767423257674
PRND	-0.537091325572627	0.085424790854248
PRR15L	-0.645180873528916	0.0272306102723061
PRR19	-0.618191086525632	0.0416958304169583
PRR22	-0.650509132751733	0.009332400093324
PRR7	-0.570011826063191	0.0474952504749525
PRRT2	-0.591168823862207	0.0421957804219578
PRSS1	-0.531295648925864	0.0787421257874212
PRSS35	-0.688498248009153	0.0148699415772708
PSAPL1	-0.625671102522186	0.0229177082291771
PSMB11	-0.646106083877002	0.0222977702229777
PSPN	-0.617211286362948	0.0394293903942939
PTAFR	-0.618841318111468	0.0456754324567543
PTX4	-0.584991943130412	0.0437456254374562
PURA	-0.62708829087697	0.0352964703529647
PYDC1	-0.669005426154184	0.0254174582541746
QRFP	-0.601687692074026	0.0376962303769623
RAB42	-0.693170715457997	0.0176732326767323
RAB6C	-0.675938161266989	0.0166233376662334
RAG1	-0.649412427958093	0.0203979602039796
RANGRF	-0.638434376571464	0.0277722227777222
RAP2B	-0.65583358591339	0.0243725627437256
RASD1	-0.639340616682105	0.0253224677532247
RBM12	-0.45500802495627	0.0853581308535813
RBM15B	-0.606676473369255	0.030663600306636
RBMXL1	-0.665162980001985	0.0216264087876927
RBMXL2	-0.705003590141559	0.00976152384761524
RBP3	-0.613797378974588	0.02995700429957
REG1A	-0.611533855033026	0.0298970102989701
REG3A	-0.630353300844807	0.0176732326767323
RELL2	-0.578019145028212	0.0572942705729427
RETN	-0.619191373585925	0.0199646701996467
RFPL3	-0.527309100029945	0.0731593507315936
RFPL4B	-0.701874870309563	0.0180781921807819
RGS19	-0.56888794119257	0.0663600306636003
RHOC	-0.565847495256907	0.0379628703796287
RHOH	-0.698643590239717	0.0121273586927022
RMI1	-0.557054409130441	0.0684681531846814
RNASE10	-0.644301855358033	0.0314968503149685
RNASE13	-0.665231359139679	0.0306769323067694
RNASE2	-0.662012559337794	0.0225144152251441
RNASE3	-0.662034114644271	0.0214978502149785
RNASE4	-0.676063534151489	0.0227643902276439
RNASE6	-0.613633214251023	0.0362963703629637
RNASE7	-0.650461513410121	0.0325467453254675
RNF113B	-0.694287247663186	0.0133653301336533
RNF133	-0.518207472706975	0.109605706096057
RNF148	-0.518636081031582	0.155409459054095
RNF152	-0.676278952775348	0.0245308802453088
RNF182	-0.607792625821952	0.0356964303569643
RNF183	-0.610092665253892	0.03666300036663
RNF186	-0.589232804283984	0.0584141585841416
RNF44	-0.513751546845229	0.0456954304569543
RP1	-0.496516988114873	0.0463620304636203
RP1L1	-0.558756897985118	0.069043095690431
RPL10L	-0.728067865965026	0.0081325200813252
RPL15	-0.593061283362745	0.0435456454354564
RPL8	-0.574390128279893	0.0573442655734427
RPP25	-0.61772739927141	0.0409292404092924
RPRM	-0.659092994888973	0.0211812152118122
RPRML	-0.6724485547986	0.0201646502016465
RRAD	-0.567284769640448	0.0435706429357064
RTEL1	-0.452236639231336	0.148760123987601
RTL1	-0.662019003025196	0.0171982801719828
RXFP3	-0.628122411644616	0.0252308102523081
S1PR1	-0.66123497435974	0.0215867302158673
S1PR2	-0.610301652260534	0.0378562143785621
S1PR3	-0.627786967309445	0.0369534475123916
S1PR4	-0.666503532439986	0.0176782321767823
S1PR5	-0.642752578477472	0.0256474352564744
SALL1	-0.560652868653169	0.0524614205246142
SALL3	-0.499490174976242	0.08001699830017
SAMD10	-0.510270837535348	0.0908242509082426
SAMD9	-0.472615302347895	0.113848615138486
SAMD9L	-0.424983559176376	0.203896277038963
SCG2	-0.659175590490952	0.0200979902009799
SCNN1D	-0.51381433701025	0.0656934306569343
SCRT1	-0.549014790352559	0.0712328767123288
SDR42E1	-0.620351428032863	0.0332300103323001
SEMA6D	-0.502541473063613	0.052969703029697
SEMG1	-0.515242235851828	0.0868513148685132
SEMG2	-0.474886880366408	0.11018898110189
SENP8	-0.603320067054199	0.0426957304269573
SEPHS2	-0.624044958526852	0.0268223177682232
SERPINB3	-0.555790094818076	0.0674932506749325
SERPINB4	-0.544532143568683	0.0519448055194481
SERTAD2	-0.628709050362528	0.0330566943305669
SERTAD3	-0.614236696252362	0.0546445355464454
SERTM1	-0.652873160645742	0.0888411158884112
SF3B5	-0.692619768629609	0.0124187581241876
SFN	-0.663046598810539	0.0346465353464654
SFTPA1	-0.622513525894284	0.0325967403259674
SFTPA2	-0.617582799263829	0.0366213378662134
SFTPC	-0.549186674538606	0.0604606206046062
SIT1	-0.591652703841341	0.0418624804186248
SLC16A11	-0.621061145918139	0.029330400293304
SLC16A13	-0.544715349828003	0.0407292604072926
SLC18A3	-0.714220685285634	0.00931156884311569
SLC25A11	-0.594778735328946	0.0427623904276239
SLC25A2	-0.6624977061127	0.0277972202779722
SLC26A2	-0.562352372375707	0.0680265306802653
SLC2A4RG	-0.54414841405241	0.077112288771123
SLC35A4	-0.587110090209007	0.0503549645035496
SLC35D3	-0.609339755589459	0.0444955504449555
SLC35G2	-0.61259326603046	0.0273222677732227
SLC35G3	-0.680970969813627	0.0177148951771489
SLC35G5	-0.6333516253661	0.0327217278272173
SLC39A4	-0.573211869784476	0.0464810661790964
SLC52A1	-0.622503495377765	0.0315568443155684
SLC52A2	-0.627387260135261	0.0321253588926822
SLC7A4	-0.612717730027611	0.0335966403359664
SLITRK1	-0.645560206028823	0.0763780764780665
SLITRK3	-0.622851936497126	0.0324467553244676
SLITRK5	-0.630461626619573	0.111248875112489
SLITRK6	-0.601966394166161	0.105039496050395
SLN	-0.758857367827552	0.00467453254674532
SMUG1	-0.551765716313698	0.0668266506682666
SNAPC2	-0.597252128975808	0.0338632803386328
SNN	-0.649269935290536	0.0270306302703063
SNRPN	-0.580809267443311	0.0393710628937106
SOCS3	-0.659736683419121	0.0318968103189681
SOCS4	-0.603308195832984	0.0337716228377162
SOCS5	-0.636696697333789	0.026997300269973
SOCS6	-0.669924816214081	0.0181696116102675
SOWAHB	-0.614538581662287	0.0284971502849715
SOX11	-0.63850606762851	0.0224310902243109
SOX12	-0.583986069771955	0.0596607005966069
SOX14	-0.638918490731738	0.0273722627737226
SOX15	-0.608104361594898	0.0383628303836283
SOX18	-0.558557250198028	0.0650101656501017
SOX7	-0.5310406630425	0.0952904709529048
SP6	-0.610300466151285	0.0390710928907109
SPACA4	-0.623614845566449	0.0350714928507149
SPATA12	-0.64676054497873	0.0253724627537246
SPATA31E1	-0.625818819636339	0.0277722227777222
SPEM1	-0.684373640718422	0.0204479552044795
SPN	-0.581505273690572	0.0608739126087391
SPRR2B	-0.641272612448408	0.0306969303069693
SPRR2E	-0.649971231422836	0.0273472652734726
SPRY1	-0.704638734342098	0.0108489151084892
SPRY2	-0.670195204571535	0.0164316901643169
SPTSSB	-0.660938361353554	0.0216311702163117
SPZ1	-0.709864025662394	0.0110655601106556
SRSF2	-0.626245024301644	0.0366296703662967
SSTR1	-0.637506865270342	0.026022397760224
SSTR2	-0.605671445367557	0.0331966803319668
SSTR3	-0.652951424083528	0.0250117845358321
SSTR4	-0.508322552211654	0.133406659334067
SSTR5	-0.63629900881816	0.0316568343165683
ST8SIA3	-0.532431518380181	0.0829250408292505
STH	-0.590362752791788	0.0448955104489551
STX11	-0.695418371229346	0.0203479652034796
STX19	-0.621427780193126	0.0311168883111689
SUOX	-0.544349726127436	0.0468953104689531
SWSAP1	-0.633522928179651	0.0257307602573076
SYNDIG1L	-0.551329418258085	0.044328900443289
SYT4	-0.530452154973755	0.0731676832316768
TAAR1	-0.664166041656373	0.0218478152184781
TACSTD2	-0.679480429620784	0.0183981601839816
TAF1L	-0.596255669496837	0.034329900343299
TAF7	-0.615432172524117	0.0397210278972103
TAS1R3	-0.60885532525736	0.0343465653434656
TAS2R1	-0.644357110571069	0.0307302603073026
TAS2R10	-0.601894584725609	0.0427757224277572
TAS2R13	-0.580999476512407	0.0518614805186148
TAS2R14	-0.561840005822684	0.0578442155784422
TAS2R19	-0.584789376287812	0.0530280305302803
TAS2R20	-0.611066748041686	0.0292770722927707
TAS2R3	-0.512825230958692	0.127662233776622
TAS2R30	-0.600747819561828	0.050328300503283
TAS2R31	-0.582694193004974	0.0562693730626937
TAS2R38	-0.511175418949984	0.125247475252475
TAS2R4	-0.511369561201817	0.132036796320368
TAS2R40	-0.506716619006193	0.136566343365663
TAS2R41	-0.494331440404464	0.16998300169983
TAS2R42	-0.59376211199089	0.0378212178782122
TAS2R46	-0.589893942237116	0.0407292604072926
TAS2R5	-0.473890596124336	0.152244775522448
TAS2R50	-0.579040848462627	0.051044895510449
TAS2R60	-0.500805769252271	0.189014431890144
TAS2R8	-0.571502279151926	0.051019898010199
TCEA2	-0.479479904313406	0.0973902609739026
TCF21	-0.569175366087634	0.0541545845415458
TDGF1	-0.53655863716467	0.062660400626604
TEX15	-0.517310571552629	0.0726482907264829
THAP11	-0.601855704858937	0.0494617204946172
THBS1	-0.524027797630535	0.05332800053328
THNSL1	-0.603822964211549	0.0461620504616205
TICAM1	-0.615416249679291	0.0345365463453655
TICAM2	-0.623823652431884	0.0347298603472986
TIFA	-0.683257008069244	0.0187981201879812
TIFAB	-0.675462944201307	0.0178267887496965
TIGD2	-0.661670882721922	0.018998100189981
TIGD3	-0.640087544416299	0.0195230476952305
TIGD4	-0.644059632216135	0.0247475252474753
TIGD6	-0.579914189588377	0.0492617404926174
TIGD7	-0.594910231578337	0.0317468253174683
TKTL2	-0.733860585314536	0.00855628722842001
TLR1	-0.623859780374609	0.0252974702529747
TLR10	-0.655283868347596	0.0210645602106456
TLR2	-0.633590080353427	0.0195230476952305
TLR6	-0.673503156912859	0.0141485851414858
TLR9	-0.582210121264646	0.0504663819332352
TMEM100	-0.622277478865296	0.0326467353264673
TMEM102	-0.607375668642851	0.0313568643135686
TMEM119	-0.63975730977949	0.028972102789721
TMEM139	-0.548147891763441	0.056327700563277
TMEM140	-0.535282399773125	0.0957504249575042
TMEM177	-0.634193727104123	0.0320110846058251
TMEM198	-0.548871034577201	0.0397960203979602
TMEM200A	-0.693433559014805	0.0183606639336066
TMEM200B	-0.552493630818573	0.0603439656034397
TMEM200C	-0.580791729685474	0.0426757324267573
TMEM203	-0.570498091981387	0.0736926307369264
TMEM215	-0.639316630629647	0.030325538874684
TMEM229B	-0.662884279819465	0.0217478252174783
TMEM52	-0.633593185876533	0.0356164383561644
TMEM60	-0.571468017115535	0.0852914708529148
TMEM89	-0.650700338418335	0.0188981101889811
TMPPE	-0.624586975906303	0.0324800853248009
TNFAIP8L1	-0.655813385982443	0.0215178482151785
TNP1	-0.648451189932084	0.0217178282171783
TOB2	-0.635070954401153	0.0343965603439656
TONSL	-0.497035389981422	0.0947905209479052
TPBG	-0.600245935191371	0.0381361863813619
TPPP3	-0.633932821894921	0.016948305169483
TPSD1	-0.591308868994155	0.0365963403659634
TRAM1L1	-0.710945536323164	0.0107417829645607
TRAPPC1	-0.578438645075742	0.0463620304636203
TRAPPC5	-0.638965548951706	0.0331681117602525
TRIB3	-0.473656547342512	0.11028897110289
TRIM28	-0.582924273235473	0.0426707329267073
TRIM52	-0.535029537939491	0.0688264506882645
TRIM56	-0.397655650777893	0.312868713128687
TRIM58	-0.554129564723153	0.0567193280671934
TRIM7	-0.47719424389813	0.0540945905409459
TRIML1	-0.595565778407575	0.0299827160141129
TSHB	-0.600014154828711	0.0438756124387561
TSHZ1	-0.648503967354007	0.0242975702429757
TSPYL1	-0.619340537304301	0.0227977202279772
TSPYL4	-0.615078181914254	0.0374462553744625
TSPYL6	-0.627378600570067	0.0378462153784622
TSSK3	-0.560117802168796	0.0553611305536113
TSSK6	-0.675952637875632	0.0164583541645835
TTC30A	-0.619015632073663	0.0376362363763624
TTC30B	-0.643310406952571	0.0266723327667233
TTN	-0.495019240587587	0.0580741925807419
TUBA1B	-0.551011597483454	0.0487201279872013
TUBA4A	-0.557620389763747	0.0474285904742859
TUBB8	-0.699568229948324	0.0115188481151885
TWIST2	-0.646429228560188	0.0217644902176449
TXNDC2	-0.586586012789892	0.0428528575713857
UBB	-0.644483092711983	0.0255831559701173
UBC	-0.62675221069225	0.0260307302603073
UBE2M	-0.63508451406889	0.0295970402959704
UBL4B	-0.564372892022896	0.062018798120188
UBQLN3	-0.671881595135993	0.0139319401393194
UBQLNL	-0.666634127189244	0.0179382061793821
UBXN10	-0.649508910985378	0.0228143852281439
UCKL1	-0.466653940405724	0.152251441522514
UCN2	-0.671358732857047	0.0173782621737826
UCN3	-0.607824424775782	0.0410708929107089
UFSP1	-0.511981821391936	0.117928207179282
UQCRQ	-0.621132878350824	0.0374962503749625
UROD	-0.525117872116549	0.0915908409159084
USP17L2	-0.640591805324355	0.0187981201879812
USP19	-0.579243485553393	0.0488617804886178
UTP14C	-0.624556852992411	0.0191647501916475
VMO1	-0.638606946000189	0.0283371662833717
VN1R1	-0.632261879111822	0.0305969403059694
VN1R2	-0.644601675716895	0.0293970602939706
VPREB1	-0.640625619131211	0.0313801953138019
VPS28	-0.55174658732827	0.0650768256507682
VRTN	-0.663131734045049	0.0184181581841816
WDR6	-0.510645749112793	0.0448205179482052
XCR1	-0.693712996383312	0.0147842358621281
XIRP1	-0.629088350845461	0.0275222477752225
ZBED2	-0.648532448020128	0.0251724827517248
ZBED4	-0.664155466340748	0.0184231576842316
ZBTB12	-0.599628896643955	0.0411792154117921
ZBTB17	-0.526078141297962	0.0512282105122821
ZBTB22	-0.627773135844324	0.0322301103223011
ZBTB26	-0.582893924839868	0.0521197880211978
ZBTB3	-0.645727284320464	0.0171482851714829
ZBTB38	-0.554804368990724	0.0274305902743059
ZBTB39	-0.550697841364955	0.0715595107155952
ZBTB4	-0.594324233825385	0.0375962403759624
ZBTB43	-0.553125018781919	0.0618604806186049
ZBTB45	-0.612793956338791	0.0314768523147685
ZBTB6	-0.591927471762089	0.0518948105189482
ZBTB9	-0.617627402275445	0.0341299203412992
ZC3H10	-0.535217886782394	0.0805252808052527
ZCCHC3	-0.562073936557325	0.0742675732426756
ZFAND2B	-0.61040227715211	0.0262723727627237
ZFP2	-0.630694510966245	0.0323134353231343
ZFP3	-0.642677386499846	0.0228477152284772
ZFP36L2	-0.616307891494185	0.0217978202179782
ZFP42	-0.759136288196827	0.0036996300369963
ZG16B	-0.550518739197	0.0524947505249475
ZIC1	-0.557009191244152	0.0301969803019698
ZNF121	-0.563174667412559	0.0515948405159484
ZNF132	-0.579804008393207	0.0528947105289471
ZNF16	-0.474564985784909	0.134419891344199
ZNF22	-0.661126853759209	0.0235405030925479
ZNF239	-0.642530104539756	0.025997400259974
ZNF250	-0.473415978739927	0.107229277072293
ZNF280A	-0.643556279130186	0.0265687716942591
ZNF280B	-0.633937365070724	0.0289304402893044
ZNF319	-0.61035249267847	0.0354678817832502
ZNF324	-0.613962070423966	0.0351798153517981
ZNF324B	-0.635315484686915	0.0229352064793521
ZNF329	-0.595597029940721	0.0495783754957837
ZNF34	-0.545852670242757	0.066013398660134
ZNF345	-0.653208572309707	0.0159317401593174
ZNF358	-0.640200858112233	0.0287971202879712
ZNF391	-0.639019480074449	0.0287971202879712
ZNF436	-0.484965008792163	0.0672266106722661
ZNF439	-0.576944827543412	0.0483551644835516
ZNF474	-0.668243068590951	0.0220977902209779
ZNF488	-0.664023099401815	0.0181606839316068
ZNF491	-0.620802029238481	0.036958804119588
ZNF497	-0.591852426485392	0.0372796053727961
ZNF501	-0.663684223796111	0.0212812052128121
ZNF502	-0.645342928381617	0.0270472952704729
ZNF512B	-0.538881925535678	0.0678807119288072
ZNF513	-0.599301561309526	0.0465703429657034
ZNF517	-0.539789129476548	0.0708529147085291
ZNF518B	-0.638097059700903	0.0280686217092576
ZNF524	-0.664015460785187	0.0247308602473086
ZNF526	-0.56214201743743	0.0629937006299371
ZNF581	-0.573779552802197	0.0660433956604339
ZNF594	-0.65462608223758	0.0253831759681175
ZNF596	-0.551444178585071	0.074992500749925
ZNF600	-0.559139999766375	0.0502092647878069
ZNF629	-0.565605535525188	0.0431956804319568
ZNF646	-0.579538037852551	0.0418958104189581
ZNF648	-0.538192458685397	0.0572942705729427
ZNF654	-0.574424356855839	0.0496950304969503
ZNF660	-0.668559429670712	0.0198605139486051
ZNF664	-0.646582705264973	0.030996900309969
ZNF668	-0.584189633491289	0.031330200313302
ZNF672	-0.641415469505288	0.0281828959961147
ZNF688	-0.564096951149657	0.027663900276639
ZNF7	-0.490557634915181	0.086966303369663
ZNF70	-0.647248857664498	0.0308469153084691
ZNF71	-0.615805780401574	0.0301541274443984
ZNF750	-0.655291614484781	0.0145652101456521
ZNF768	-0.625481057667411	0.0392710728927107
ZNF770	-0.643682483758192	0.0271829959861157
ZNF781	-0.579267747492932	0.0525747425257473
ZNF80	-0.69808554651598	0.0141985801419858
ZNF83	-0.603181850778268	0.0495200479952005
ZNF835	-0.671356006889609	0.0154609539046095
ZNF837	-0.660578133524702	0.0176982301769823
ZNF860	-0.621888002834645	0.0282543174254003
ZSCAN10	-0.56330382788071	0.0426757324267573
ZSCAN5B	-0.596749848817648	0.0200313302003133
ZWINT	-0.592043195353897	0.0443955604439556

## Sheet: Protected_GOenriched
ONTOLOGY	ID	Description	GeneRatio	BgRatio	pvalue	p.adjust	qvalue	geneID	Count
BP	GO:1901564	organonitrogen compound metabolic process	198/526	453/1525	7.14262e-07	0.00119523	0.00115786	AANAT/ADCY2/AGXT2/AMN1/AMZ2/ANAPC11/ANAPC13/APOA2/APOD/APOLD1/ASB16/ATP6V0C/B4GALT3/BLOC1S1/BOLA2B/BTG2/CALM2/CAMK2N2/CAMKMT/CAPN14/CASP12/CD27/CDCA3/CDK3/CHMP3/CHMP4B/CISD3/CKS1B/CMAS/COA3/COMMD1/CYCS/CYP51A1/DAP/DEDD/DERL1/DESI2/DNAJB9/DPM3/DSCC1/DUSP12/DUSP15/DUSP23/EFNA3/EIF1/EIF3CL/EIF5A2/EIF6/ENSA/EPO/ERC1/FBXL7/FGF10/FIS1/FKBP14/GDF11/GH1/GHR/GLRX2/GOLPH3/HCST/HES1/HMGCS1/HS3ST6/IFNG/IL10/…	198
BP	GO:0044260	cellular macromolecule metabolic process	187/526	424/1525	8.20503e-07	0.00119523	0.00115786	AANAT/ALYREF/AMN1/ANAPC11/ANAPC13/APOA2/ASB16/B4GALT3/BANF1/BLOC1S1/BTG2/CALM2/CAMK2N2/CAMKMT/CD27/CDCA3/CDK3/CHMP3/CHMP4B/CHRAC1/CKS1B/COA3/COMMD1/CYCS/DAP/DDX5/DERL1/DESI2/DNAJB9/DNASE1L2/DPM3/DROSHA/DSCC1/DUSP12/DUSP15/DUSP23/EFNA3/EIF1/EIF3CL/EIF5A2/EIF6/ENSA/EPO/ERC1/EXOSC6/FBXL7/FGF10/FIS1/FKBP14/GCGR/GDF11/GDNF/GFER/GH1/GHR/GLRX2/GMNC/GOLPH3/HCRT/HCST/HES1/IFNG/IL10/IL20/IL23A/JTB/KCTD2/KP…	187
BP	GO:0007005	mitochondrion organization	31/526	44/1525	8.68625e-07	0.00119523	0.00115786	BHLHA15/CAMKMT/COA3/COX14/COX17/COX20/COX7A1/DNAJC19/FIS1/GABARAPL1/GOLPH3/HIGD1B/HRK/MPV17L/NDUFA8/NDUFAF6/NDUFB2/NDUFC2/PDCD5/PET117/ROMO1/SDHAF1/SLIRP/TACO1/THEM4/TIMM10/TIMM13/TIMM17A/TOMM20/TOMM40L/TOMM7	31
BP	GO:0019637	organophosphate metabolic process	33/526	49/1525	1.92442e-06	0.00198601	0.00192392	ADCY2/APOA2/ATP6V0C/DNAJC19/DPM3/EFR3B/EIF6/HMGCS1/IFNG/JMJD8/LPCAT1/LPCAT3/LPGAT1/MBOAT2/MCEE/MPC2/MTMR12/NME1/NME2/NME3/NT5C/PGP/PIGC/PIGM/PIGX/PLA2G10/RBKS/SLA2/SOCS1/SOCS3/SULT1A3/TMEM150A/UCK2	33
BP	GO:0019538	protein metabolic process	175/526	402/1525	7.12208e-06	0.00541009	0.00524095	AANAT/AMN1/AMZ2/ANAPC11/ANAPC13/APOA2/APOD/APOLD1/ASB16/B4GALT3/BLOC1S1/BOLA2B/BTG2/CALM2/CAMK2N2/CAMKMT/CAPN14/CASP12/CD27/CDCA3/CDK3/CHMP3/CHMP4B/CISD3/CKS1B/COA3/COMMD1/CYCS/CYP51A1/DAP/DEDD/DERL1/DESI2/DNAJB9/DPM3/DSCC1/DUSP12/DUSP15/DUSP23/EFNA3/EIF1/EIF3CL/EIF5A2/EIF6/ENSA/EPO/ERC1/FBXL7/FGF10/FIS1/FKBP14/GDF11/GH1/GHR/GOLPH3/HCST/HES1/IFNG/IL10/IL20/IL23A/JTB/KCTD2/KPNA7/KRTCAP2/LEP/LIPT2/…	175
BP	GO:0051668	localization within membrane	31/526	47/1525	7.8635e-06	0.00541009	0.00524095	ABI3/ARL5C/CACNG4/CHMP4B/CNIH2/COMMD1/EFR3B/F11R/FIS1/GOLPH3/GOLPH3L/IFNG/NACAD/NKD2/PDCD5/PEX19/PRKCE/PTN/RAB40B/ROMO1/S100A10/SNF8/SRP9/STX6/TIMM10/TIMM13/TMEM150A/VAMP8/ZDHHC19/ZDHHC22/ZDHHC24	31
BP	GO:0033036	macromolecule localization	87/526	176/1525	1.008e-05	0.0059443	0.00575846	ABI3/ALYREF/APOA2/APOD/APOLD1/ARL14/ARL5C/C1QTNF3/CACNG4/CCDC91/CD247/CHMP3/CHMP4B/COMMD1/CYP51A1/DERL1/DNAJC19/EFR3B/EIF5A2/ENSA/ERC1/F11R/FGF10/FIS1/FOXJ1/GOLPH3/GOLPH3L/GOLT1A/GOLT1B/HILPDA/IFNG/IL10/KPNA7/LAMTOR2/LAMTOR4/LEP/LPCAT3/M6PR/MAFA/MPC2/NACAD/NDFIP2/NKD2/NMB/NNAT/OXCT1/PDCD5/PEX19/PLA2G10/PPIA/PPY/PRKCE/PTN/RAB1A/RAB22A/RAB40B/RABGAP1L/RBP5/REP15/ROMO1/S100A10/S100A13/SERP1/SFT2D2/S…	87
BP	GO:0044267	cellular protein metabolic process	156/526	356/1525	1.89255e-05	0.00929738	0.00900672	AANAT/AMN1/ANAPC11/ANAPC13/APOA2/ASB16/B4GALT3/BLOC1S1/BTG2/CALM2/CAMK2N2/CAMKMT/CD27/CDCA3/CDK3/CHMP3/CHMP4B/CKS1B/COA3/COMMD1/CYCS/DAP/DERL1/DESI2/DNAJB9/DPM3/DSCC1/DUSP12/DUSP15/DUSP23/EFNA3/EIF1/EIF3CL/EIF5A2/EIF6/ENSA/EPO/ERC1/FBXL7/FGF10/FIS1/FKBP14/GDF11/GH1/GHR/HCST/HES1/IFNG/IL10/IL20/IL23A/JTB/KCTD2/KPNA7/KRTCAP2/LEP/LIPT2/LPCAT3/MAGEF1/MALSU1/MAP6D1/MED10/MED30/MIF4GD/MRPL36/MRPL41/MRP…	156
BP	GO:0007260	tyrosine phosphorylation of STAT protein	10/526	10/1525	2.25227e-05	0.00929738	0.00900672	EPO/GH1/GHR/HES1/IFNG/IL20/IL23A/LEP/SOCS1/SOCS3	10
BP	GO:0042509	regulation of tyrosine phosphorylation of STAT protein	10/526	10/1525	2.25227e-05	0.00929738	0.00900672	EPO/GH1/GHR/HES1/IFNG/IL20/IL23A/LEP/SOCS1/SOCS3	10
BP	GO:0008104	protein localization	78/526	157/1525	2.50482e-05	0.00939992	0.00910605	ABI3/APOD/ARL14/ARL5C/C1QTNF3/CACNG4/CCDC91/CD247/CHMP3/CHMP4B/COMMD1/CYP51A1/DERL1/DNAJC19/EFR3B/EIF5A2/ENSA/ERC1/F11R/FGF10/FIS1/FOXJ1/GOLPH3/GOLPH3L/GOLT1A/GOLT1B/IFNG/IL10/KPNA7/LAMTOR2/LAMTOR4/LEP/M6PR/MAFA/MPC2/NACAD/NDFIP2/NKD2/NNAT/OXCT1/PDCD5/PEX19/PPIA/PPY/PRKCE/PTN/RAB1A/RAB22A/RAB40B/RABGAP1L/REP15/ROMO1/S100A10/S100A13/SERP1/SFT2D2/SMYD3/SNAPIN/SNF8/SRP9/STX6/SUCNR1/TIMM10/TIMM13/TIM…	78
BP	GO:0015031	protein transport	61/526	118/1525	4.76798e-05	0.0134698	0.0130487	APOD/ARL14/ARL5C/C1QTNF3/CACNG4/CCDC91/CHMP3/CHMP4B/COMMD1/CYP51A1/DERL1/DNAJC19/EIF5A2/ENSA/ERC1/FIS1/GOLPH3/GOLPH3L/GOLT1A/GOLT1B/IFNG/KPNA7/LEP/M6PR/MAFA/MPC2/NACAD/NDFIP2/NNAT/OXCT1/PDCD5/PEX19/PPIA/PPY/PRKCE/RAB1A/RAB22A/REP15/ROMO1/S100A13/SERP1/SFT2D2/SNAPIN/SNF8/SRP9/STX6/SUCNR1/TIMM10/TIMM13/TIMM17A/TOMM20/TOMM40L/TOMM7/VAMP8/VPS25/VSNL1/ZBED6/ZDHHC19/ZDHHC22/ZDHHC24/ZG16	61
BP	GO:0006650	glycerophospholipid metabolic process	18/526	24/1525	5.29417e-05	0.0134698	0.0130487	APOA2/DNAJC19/DPM3/EFR3B/LPCAT1/LPCAT3/LPGAT1/MBOAT2/MTMR12/PGP/PIGC/PIGM/PIGX/PLA2G10/SLA2/SOCS1/SOCS3/TMEM150A	18
BP	GO:0051641	cellular localization	85/526	177/1525	5.39484e-05	0.0134698	0.0130487	ABI3/ALYREF/APOD/ARL14/ARL5C/BHLHA15/BLOC1S1/CACNG4/CALM2/CCDC91/CD247/CEP19/CHMP3/CHMP4B/CNIH2/COMMD1/DERL1/DNAJC19/EFR3B/EIF6/EPO/ERC1/F11R/FGF10/FIS1/FOXJ1/GDNF/GOLPH3/GOLPH3L/GOLT1A/HCRT/HSBP1/IFNG/KLRF2/KPNA7/LAMTOR2/LAMTOR4/LEP/M6PR/MAD1L1/MAP6D1/MPC2/MPV17L/MYO10/NACAD/NDFIP2/NKD2/OXCT1/PDCD5/PEX19/PFN2/PRKCE/PTN/RAB1A/RAB22A/RAB40B/ROMO1/RSRC1/S100A10/S100A13/S100A8/S100A9/SDCBP2/SNAPIN/S…	85
BP	GO:0043603	cellular amide metabolic process	48/526	88/1525	5.62637e-05	0.0134698	0.0130487	AANAT/B4GALT3/BTG2/CMAS/COA3/EIF1/EIF3CL/EIF5A2/EIF6/GLRX2/HMGCS1/IFNG/MALSU1/MCEE/MIF4GD/MPC2/MRPL36/MRPL41/MRPL51/MRPL9/MRPS14/MRPS21/MRPS33/MRPS34/MRPS7/MTPN/NIT1/NPL/NT5C/PAIP1/PAIP2B/RPL18/RPL22L1/RPL27/RPL30/RPL36AL/RPL37/RPL38/RPL39L/RPL41/RPS25/RPS27/SERP1/SPTSSB/SRP9/TACO1/UCN/ZNF706	48
BP	GO:0045184	establishment of protein localization	62/526	121/1525	5.84339e-05	0.0134698	0.0130487	APOD/ARL14/ARL5C/C1QTNF3/CACNG4/CCDC91/CHMP3/CHMP4B/COMMD1/CYP51A1/DERL1/DNAJC19/EIF5A2/ENSA/ERC1/FIS1/GOLPH3/GOLPH3L/GOLT1A/GOLT1B/IFNG/KPNA7/LEP/M6PR/MAFA/MPC2/NACAD/NDFIP2/NNAT/OXCT1/PDCD5/PEX19/PPIA/PPY/PRKCE/RAB1A/RAB22A/REP15/ROMO1/S100A13/SERP1/SFT2D2/SMYD3/SNAPIN/SNF8/SRP9/STX6/SUCNR1/TIMM10/TIMM13/TIMM17A/TOMM20/TOMM40L/TOMM7/VAMP8/VPS25/VSNL1/ZBED6/ZDHHC19/ZDHHC22/ZDHHC24/ZG16	62
BP	GO:0006644	phospholipid metabolic process	19/526	26/1525	5.91392e-05	0.0134698	0.0130487	APOA2/DNAJC19/DPM3/EFR3B/HMGCS1/LPCAT1/LPCAT3/LPGAT1/MBOAT2/MTMR12/PGP/PIGC/PIGM/PIGX/PLA2G10/SLA2/SOCS1/SOCS3/TMEM150A	19
BP	GO:0043604	amide biosynthetic process	40/526	70/1525	5.99795e-05	0.0134698	0.0130487	AANAT/B4GALT3/BTG2/COA3/EIF1/EIF3CL/EIF5A2/EIF6/MALSU1/MIF4GD/MPC2/MRPL36/MRPL41/MRPL51/MRPL9/MRPS14/MRPS21/MRPS33/MRPS34/MRPS7/MTPN/PAIP1/PAIP2B/RPL18/RPL22L1/RPL27/RPL30/RPL36AL/RPL37/RPL38/RPL39L/RPL41/RPS25/RPS27/SERP1/SPTSSB/SRP9/TACO1/UCN/ZNF706	40
BP	GO:0033108	mitochondrial respiratory chain complex assembly	11/526	12/1525	6.33499e-05	0.0134698	0.0130487	COA3/COX14/COX17/COX20/NDUFA8/NDUFAF6/NDUFB2/NDUFC2/PET117/SDHAF1/TACO1	11
BP	GO:0140053	mitochondrial gene expression	9/526	9/1525	6.60434e-05	0.0134698	0.0130487	COA3/MALSU1/MRPL12/MRPL51/MRPS14/MRPS21/MRPS34/MRPS7/TACO1	9
BP	GO:0090407	organophosphate biosynthetic process	22/526	32/1525	6.85235e-05	0.0134698	0.0130487	ADCY2/APOA2/ATP6V0C/DPM3/EFR3B/HMGCS1/LPCAT1/LPCAT3/LPGAT1/MBOAT2/MPC2/NME1/NME2/NME3/PIGC/PIGM/PIGX/SLA2/SOCS1/SOCS3/TMEM150A/UCK2	22
BP	GO:0006412	translation	36/526	62/1525	9.03996e-05	0.0162248	0.0157175	BTG2/COA3/EIF1/EIF3CL/EIF5A2/EIF6/MALSU1/MIF4GD/MRPL36/MRPL41/MRPL51/MRPL9/MRPS14/MRPS21/MRPS33/MRPS34/MRPS7/MTPN/PAIP1/PAIP2B/RPL18/RPL22L1/RPL27/RPL30/RPL36AL/RPL37/RPL38/RPL39L/RPL41/RPS25/RPS27/SERP1/SRP9/TACO1/UCN/ZNF706	36
BP	GO:0043043	peptide biosynthetic process	36/526	62/1525	9.03996e-05	0.0162248	0.0157175	BTG2/COA3/EIF1/EIF3CL/EIF5A2/EIF6/MALSU1/MIF4GD/MRPL36/MRPL41/MRPL51/MRPL9/MRPS14/MRPS21/MRPS33/MRPS34/MRPS7/MTPN/PAIP1/PAIP2B/RPL18/RPL22L1/RPL27/RPL30/RPL36AL/RPL37/RPL38/RPL39L/RPL41/RPS25/RPS27/SERP1/SRP9/TACO1/UCN/ZNF706	36
BP	GO:0072657	protein localization to membrane	26/526	41/1525	0.000120819	0.0207808	0.0201311	ABI3/ARL5C/CHMP4B/EFR3B/F11R/FIS1/GOLPH3/GOLPH3L/IFNG/NACAD/NKD2/PDCD5/PEX19/PRKCE/PTN/RAB40B/ROMO1/S100A10/SRP9/TIMM10/TIMM13/TMEM150A/VAMP8/ZDHHC19/ZDHHC22/ZDHHC24	26
BP	GO:0006518	peptide metabolic process	38/526	68/1525	0.000178069	0.0294028	0.0284836	BTG2/COA3/EIF1/EIF3CL/EIF5A2/EIF6/GLRX2/IFNG/MALSU1/MIF4GD/MRPL36/MRPL41/MRPL51/MRPL9/MRPS14/MRPS21/MRPS33/MRPS34/MRPS7/MTPN/PAIP1/PAIP2B/RPL18/RPL22L1/RPL27/RPL30/RPL36AL/RPL37/RPL38/RPL39L/RPL41/RPS25/RPS27/SERP1/SRP9/TACO1/UCN/ZNF706	38
BP	GO:0032543	mitochondrial translation	8/526	8/1525	0.000193413	0.0295707	0.0286462	COA3/MALSU1/MRPL51/MRPS14/MRPS21/MRPS34/MRPS7/TACO1	8
BP	GO:0042531	positive regulation of tyrosine phosphorylation of STAT protein	8/526	8/1525	0.000193413	0.0295707	0.0286462	EPO/GH1/GHR/HES1/IFNG/IL20/IL23A/LEP	8
BP	GO:0006091	generation of precursor metabolites and energy	25/526	40/1525	0.000230383	0.0335694	0.03252	BLOC1S1/COX17/COX6A1/COX6B2/COX6C/COX7A1/CYCS/EIF6/GCGR/GLRX2/IFNG/JMJD8/LEP/NDUFA8/NDUFB2/NDUFC2/NDUFS6/OXCT1/PPP1R2/PPP1R3D/RBKS/SDHC/SRD5A1/TACO1/UCN	25
BP	GO:0008654	phospholipid biosynthetic process	15/526	20/1525	0.000235832	0.0335694	0.03252	APOA2/DPM3/EFR3B/HMGCS1/LPCAT1/LPCAT3/LPGAT1/MBOAT2/PIGC/PIGM/PIGX/SLA2/SOCS1/SOCS3/TMEM150A	15
BP	GO:0051052	regulation of DNA metabolic process	19/526	28/1525	0.000288799	0.0387054	0.0374954	ALYREF/CHRAC1/DSCC1/EXOSC6/FGF10/GFER/GMNC/HCRT/IL10/MAGEF1/RMI2/RNF168/S100A11/SUB1/TEN1/UCHL5/UCN/WDR70/YEATS4	19
BP	GO:0006996	organelle organization	108/526	243/1525	0.000290666	0.0387054	0.0374954	ABI3/AEBP2/ANAPC11/ANP32E/ARPC5/BANF1/BHLHA15/BLOC1S1/BRIX1/BTBD18/CAMKMT/CDC42EP5/CEP19/CHMP3/CHMP4B/CHRAC1/COA3/COX14/COX17/COX20/COX7A1/DNAJC19/DSCC1/EIF1/EIF6/ENAH/F11R/FGF10/FIS1/FOXJ1/GABARAPL1/GATAD1/GMNC/GOLPH3/GOLPH3L/GRB2/HIGD1B/HRK/KISS1/LPCAT3/MAD1L1/MAP6D1/MDK/MPV17L/MRPS7/MSL1/MTPN/NDUFA8/NDUFAF6/NDUFB2/NDUFC2/NKD2/NOS1AP/NOTO/NSMCE2/PDCD5/PET117/PEX19/PFDN2/PFN2/PFN3/PPIA/PRKAR1A/P…	108
BP	GO:0002181	cytoplasmic translation	12/526	15/1525	0.000385122	0.0481753	0.0466692	EIF3CL/MIF4GD/PAIP1/RPL18/RPL22L1/RPL27/RPL30/RPL37/RPL38/RPL41/RPS25/RPS27	12
BP	GO:0042157	lipoprotein metabolic process	12/526	15/1525	0.000385122	0.0481753	0.0466692	APOA2/APOD/APOLD1/DPM3/LEP/MAP6D1/PIGC/PIGM/PIGX/ZDHHC19/ZDHHC22/ZDHHC24	12
CC	GO:0005739	mitochondrion	81/573	130/1648	2.29417e-11	1.18609e-08	1.00702e-08	AGXT2/BLOC1S1/BOLA3/C14orf119/CISD3/COA3/COX14/COX17/COX20/COX6A1/COX6B2/COX6C/COX7A1/CYCS/DNAJC19/FAM72A/FIS1/G0S2/GABARAPL1/GFER/GHR/GLRX2/GOLPH3/HIGD1B/HRK/JTB/LIPT2/MALSU1/MCCD1/MCEE/MPC2/MPV17L/MRPL12/MRPL36/MRPL41/MRPL48/MRPL51/MRPL9/MRPS14/MRPS21/MRPS23/MRPS33/MRPS34/MRPS35/MRPS7/MYL10/NDFIP2/NDUFA4L2/NDUFA8/NDUFAF6/NDUFB2/NDUFC2/NDUFS6/NENF/NIT1/NOS1AP/NRGN/OXCT1/PET117/PFDN2/PFDN4/PRDX5/…	81
CC	GO:0098798	mitochondrial protein-containing complex	29/573	32/1648	4.71105e-11	1.21781e-08	1.03395e-08	COX6A1/COX6C/COX7A1/DNAJC19/MRPL12/MRPL36/MRPL41/MRPL48/MRPL51/MRPL9/MRPS14/MRPS21/MRPS33/MRPS34/MRPS35/MRPS7/NDUFA4L2/NDUFA8/NDUFB2/NDUFC2/NDUFS6/ROMO1/SDHC/TIMM10/TIMM13/TIMM17A/TOMM20/TOMM40L/TOMM7	29
CC	GO:0031967	organelle envelope	59/573	90/1648	9.13062e-10	1.18013e-07	1.00197e-07	ATF6/BANF1/BLOC1S1/CHMP3/CHMP4B/COA3/COX14/COX17/COX20/COX6A1/COX6B2/COX6C/COX7A1/CYCS/DNAJC19/EIF5A2/FIS1/GFER/GOLPH3/GOLT1A/MAD1L1/MGST3/MPC2/MRPL12/MRPL36/MRPL41/MRPL48/MRPL51/MRPL9/MRPS14/MRPS21/MRPS23/MRPS33/MRPS34/MRPS35/MRPS7/NDUFA4L2/NDUFA8/NDUFAF6/NDUFB2/NDUFC2/NDUFS6/NOS1AP/NRGN/RAB40B/ROMO1/S100A6/SDHC/SLC25A19/SLC25A21/THEM4/TIMM10/TIMM13/TIMM17A/TMEM65/TOMM20/TOMM40L/TOMM7/YEATS4	59
CC	GO:0031975	envelope	59/573	90/1648	9.13062e-10	1.18013e-07	1.00197e-07	ATF6/BANF1/BLOC1S1/CHMP3/CHMP4B/COA3/COX14/COX17/COX20/COX6A1/COX6B2/COX6C/COX7A1/CYCS/DNAJC19/EIF5A2/FIS1/GFER/GOLPH3/GOLT1A/MAD1L1/MGST3/MPC2/MRPL12/MRPL36/MRPL41/MRPL48/MRPL51/MRPL9/MRPS14/MRPS21/MRPS23/MRPS33/MRPS34/MRPS35/MRPS7/NDUFA4L2/NDUFA8/NDUFAF6/NDUFB2/NDUFC2/NDUFS6/NOS1AP/NRGN/RAB40B/ROMO1/S100A6/SDHC/SLC25A19/SLC25A21/THEM4/TIMM10/TIMM13/TIMM17A/TMEM65/TOMM20/TOMM40L/TOMM7/YEATS4	59
CC	GO:0005740	mitochondrial envelope	47/573	72/1648	6.73355e-08	6.9625e-06	5.91135e-06	BLOC1S1/COA3/COX14/COX17/COX20/COX6A1/COX6B2/COX6C/COX7A1/CYCS/DNAJC19/FIS1/GFER/GOLPH3/MPC2/MRPL12/MRPL36/MRPL41/MRPL48/MRPL51/MRPL9/MRPS14/MRPS21/MRPS23/MRPS33/MRPS34/MRPS35/MRPS7/NDUFA4L2/NDUFA8/NDUFAF6/NDUFB2/NDUFC2/NDUFS6/NRGN/ROMO1/SDHC/SLC25A19/SLC25A21/THEM4/TIMM10/TIMM13/TIMM17A/TMEM65/TOMM20/TOMM40L/TOMM7	47
CC	GO:0005743	mitochondrial inner membrane	37/573	53/1648	1.35183e-07	1.16483e-05	9.88971e-06	COA3/COX20/COX6A1/COX6B2/COX6C/COX7A1/CYCS/DNAJC19/MPC2/MRPL12/MRPL36/MRPL41/MRPL48/MRPL51/MRPL9/MRPS14/MRPS21/MRPS23/MRPS33/MRPS34/MRPS35/MRPS7/NDUFA4L2/NDUFA8/NDUFAF6/NDUFB2/NDUFC2/NDUFS6/ROMO1/SDHC/SLC25A19/SLC25A21/THEM4/TIMM10/TIMM13/TIMM17A/TMEM65	37
CC	GO:0005829	cytosol	168/573	366/1648	3.82132e-07	2.82232e-05	2.39623e-05	AANAT/ACBD6/ADAP1/ALYREF/ANAPC11/APOA2/APOD/ARHGAP23/ARPC5/ASB16/ATF6/ATP6V1F/ATP6V1G1/B4GALT3/BANF1/BLOC1S1/BNIPL/BOLA2B/BOLA3/BTG2/C14orf119/C19orf33/CAMK2N2/CAMKMT/CASP12/CCDC43/CCDC50/CCDC91/CD79B/CDC42EP5/CDCA3/CHMP3/CHMP4B/CHN2/COMMD1/CYCS/CYS1/DDX5/DNAJC21/DROSHA/DUSP12/DUSP15/DUSP23/EFR3B/EIF5A2/EIF6/ENAH/ERC1/EXOSC6/FAM72A/FBXL7/FIS1/GABARAPL1/GFER/GHR/GNB4/GNPNAT1/GOLPH3/GOLPH3L/GRB2/HI…	168
CC	GO:0031966	mitochondrial membrane	43/573	67/1648	5.23037e-07	3.38013e-05	2.86982e-05	COA3/COX14/COX20/COX6A1/COX6B2/COX6C/COX7A1/CYCS/DNAJC19/FIS1/MPC2/MRPL12/MRPL36/MRPL41/MRPL48/MRPL51/MRPL9/MRPS14/MRPS21/MRPS23/MRPS33/MRPS34/MRPS35/MRPS7/NDUFA4L2/NDUFA8/NDUFAF6/NDUFB2/NDUFC2/NDUFS6/NRGN/ROMO1/SDHC/SLC25A19/SLC25A21/THEM4/TIMM10/TIMM13/TIMM17A/TMEM65/TOMM20/TOMM40L/TOMM7	43
CC	GO:0019866	organelle inner membrane	37/573	55/1648	5.97905e-07	3.43463e-05	2.9161e-05	COA3/COX20/COX6A1/COX6B2/COX6C/COX7A1/CYCS/DNAJC19/MPC2/MRPL12/MRPL36/MRPL41/MRPL48/MRPL51/MRPL9/MRPS14/MRPS21/MRPS23/MRPS33/MRPS34/MRPS35/MRPS7/NDUFA4L2/NDUFA8/NDUFAF6/NDUFB2/NDUFC2/NDUFS6/ROMO1/SDHC/SLC25A19/SLC25A21/THEM4/TIMM10/TIMM13/TIMM17A/TMEM65	37
CC	GO:0005840	ribosome	26/573	35/1648	1.66807e-06	8.62392e-05	7.32195e-05	APOD/DNAJC21/MRPL12/MRPL36/MRPL41/MRPL48/MRPL51/MRPL9/MRPS14/MRPS21/MRPS33/MRPS34/MRPS35/MRPS7/RPL18/RPL22L1/RPL27/RPL30/RPL36AL/RPL37/RPL38/RPL39L/RPL41/RPS25/RPS27/SERP1	26
CC	GO:1902494	catalytic complex	58/573	103/1648	3.16241e-06	0.000148633	0.000126194	AEBP2/ALYREF/AMN1/ANAPC11/ANAPC13/ANP32E/BUD31/C1D/CALM2/CDK3/CHRAC1/CKS1B/COMMD1/DDX5/DERL1/DPM3/DROSHA/ERC1/EXOSC6/FBXL7/GNB4/GNG11/GNG4/GNGT2/KCTD2/KRTCAP2/MAGOHB/MED10/MED30/MSL1/NDUFA8/NDUFB2/NDUFC2/NDUFS6/NSMCE2/PIGC/PIGM/POLE4/POLR2J/POLR2J2/POLR2K/PPP1R3D/PPP3R1/PRKAR1A/PSMA7/RNF168/RPRD1B/SDHC/SKP2/SLA2/SNRPE/SNRPG/SOCS1/SOCS3/SPTSSB/UCHL5/YEATS4/YPEL5	58
CC	GO:0032991	protein-containing complex	185/573	422/1648	4.65244e-06	0.000200443	0.000170182	ABI3/AEBP2/ALYREF/AMN1/ANAPC11/ANAPC13/ANP32E/APOA2/ARPC5/ATF6/ATP6V0C/ATP6V1F/ATP6V1G1/BLOC1S1/BOLA2B/BOLA3/BUD31/C1D/C1QTNF3/CACNG1/CACNG4/CALM2/CAMKMT/CASP12/CD247/CD79B/CD9/CDH12/CDH18/CDK3/CHMP3/CHMP4B/CHRAC1/CKS1B/CLDN1/CNIH2/COMMD1/COX6A1/COX6B2/COX6C/COX7A1/CPSF4/CPSF4L/CREG1/CYCS/DDX5/DERL1/DNAJC19/DPM3/DROSHA/DSCC1/EFCAB9/EIF1/EIF3CL/EIF5A2/EIF6/ERC1/EXOSC6/F11R/FBXL7/FCER1G/FCGR3A/FIS1…	185
CC	GO:0098800	inner mitochondrial membrane protein complex	13/573	14/1648	9.4734e-06	0.00037675	0.000319871	COX6A1/COX6C/COX7A1/DNAJC19/NDUFA4L2/NDUFA8/NDUFB2/NDUFC2/NDUFS6/ROMO1/SDHC/TIMM10/TIMM17A	13
CC	GO:0031090	organelle membrane	127/573	277/1648	1.92168e-05	0.000709647	0.00060251	ATF6/ATP6V0C/ATP6V1F/ATP6V1G1/B4GALT3/BLOC1S1/BRI3/CACNG4/CD9/CHMP3/CHMP4B/CNIH2/COA3/COMMD1/COX14/COX20/COX6A1/COX6B2/COX6C/COX7A1/CYCS/CYP51A1/CYS1/DERL1/DNAJB9/DNAJC19/DPM3/EIF5A2/ERC1/FCER1G/FIS1/GABARAPL1/GNB4/GNPNAT1/GOLPH3/GOLPH3L/GOLT1A/GOLT1B/GRB2/HLA-DRB5/HS3ST6/HSD11B1/HSD17B7/KREMEN2/KRTCAP2/LAMTOR2/LAMTOR4/LITAF/LPCAT1/LPCAT3/LPGAT1/M6PR/MBOAT2/MGST3/MPC2/MPV17L/MRPL12/MRPL36/MRPL41/…	127
CC	GO:0044391	ribosomal subunit	22/573	31/1648	3.68607e-05	0.00127047	0.00107866	MRPL12/MRPL36/MRPL41/MRPL48/MRPL51/MRPL9/MRPS14/MRPS21/MRPS33/MRPS34/MRPS35/MRPS7/RPL18/RPL27/RPL30/RPL36AL/RPL37/RPL38/RPL39L/RPL41/RPS25/RPS27	22
CC	GO:0070062	extracellular exosome	75/573	153/1648	9.76709e-05	0.00315599	0.00267953	ALYREF/APOA2/APOD/ARHGAP23/ARPC5/ATP6V0C/ATP6V1F/ATP6V1G1/B4GALT3/BASP1/BTG2/C1QTNF3/CCL28/CD48/CD79B/CD9/CHMP3/CHMP4B/CREG1/DCXR/DDX5/DNAJB9/EIF6/F11R/FCGR3A/GNB4/GNG4/GRB2/HEBP1/HLA-DRB5/LGALS7B/LYZ/MGP/NDRG1/NME1/NME2/NT5C/PDCD5/PFN2/PILRA/PIP/PPIA/PPIAL4C/PRDX5/PSMA7/RAB1A/RAB22A/RAC3/RARRES1/RBP5/RPL27/RPL30/RPS25/S100A10/S100A11/S100A14/S100A16/S100A4/S100A6/S100A8/S100A9/SDCBP2/SECTM1/SEMA…	75
CC	GO:0000313	organellar ribosome	12/573	14/1648	0.00012313	0.00353656	0.00300264	MRPL12/MRPL36/MRPL41/MRPL48/MRPL51/MRPL9/MRPS14/MRPS21/MRPS33/MRPS34/MRPS35/MRPS7	12
CC	GO:0005761	mitochondrial ribosome	12/573	14/1648	0.00012313	0.00353656	0.00300264	MRPL12/MRPL36/MRPL41/MRPL48/MRPL51/MRPL9/MRPS14/MRPS21/MRPS33/MRPS34/MRPS35/MRPS7	12
CC	GO:0043230	extracellular organelle	75/573	156/1648	0.000219212	0.00539678	0.00458202	ALYREF/APOA2/APOD/ARHGAP23/ARPC5/ATP6V0C/ATP6V1F/ATP6V1G1/B4GALT3/BASP1/BTG2/C1QTNF3/CCL28/CD48/CD79B/CD9/CHMP3/CHMP4B/CREG1/DCXR/DDX5/DNAJB9/EIF6/F11R/FCGR3A/GNB4/GNG4/GRB2/HEBP1/HLA-DRB5/LGALS7B/LYZ/MGP/NDRG1/NME1/NME2/NT5C/PDCD5/PFN2/PILRA/PIP/PPIA/PPIAL4C/PRDX5/PSMA7/RAB1A/RAB22A/RAC3/RARRES1/RBP5/RPL27/RPL30/RPS25/S100A10/S100A11/S100A14/S100A16/S100A4/S100A6/S100A8/S100A9/SDCBP2/SECTM1/SEMA…	75
CC	GO:0065010	extracellular membrane-bounded organelle	75/573	156/1648	0.000219212	0.00539678	0.00458202	ALYREF/APOA2/APOD/ARHGAP23/ARPC5/ATP6V0C/ATP6V1F/ATP6V1G1/B4GALT3/BASP1/BTG2/C1QTNF3/CCL28/CD48/CD79B/CD9/CHMP3/CHMP4B/CREG1/DCXR/DDX5/DNAJB9/EIF6/F11R/FCGR3A/GNB4/GNG4/GRB2/HEBP1/HLA-DRB5/LGALS7B/LYZ/MGP/NDRG1/NME1/NME2/NT5C/PDCD5/PFN2/PILRA/PIP/PPIA/PPIAL4C/PRDX5/PSMA7/RAB1A/RAB22A/RAC3/RARRES1/RBP5/RPL27/RPL30/RPS25/S100A10/S100A11/S100A14/S100A16/S100A4/S100A6/S100A8/S100A9/SDCBP2/SECTM1/SEMA…	75
CC	GO:1903561	extracellular vesicle	75/573	156/1648	0.000219212	0.00539678	0.00458202	ALYREF/APOA2/APOD/ARHGAP23/ARPC5/ATP6V0C/ATP6V1F/ATP6V1G1/B4GALT3/BASP1/BTG2/C1QTNF3/CCL28/CD48/CD79B/CD9/CHMP3/CHMP4B/CREG1/DCXR/DDX5/DNAJB9/EIF6/F11R/FCGR3A/GNB4/GNG4/GRB2/HEBP1/HLA-DRB5/LGALS7B/LYZ/MGP/NDRG1/NME1/NME2/NT5C/PDCD5/PFN2/PILRA/PIP/PPIA/PPIAL4C/PRDX5/PSMA7/RAB1A/RAB22A/RAC3/RARRES1/RBP5/RPL27/RPL30/RPS25/S100A10/S100A11/S100A14/S100A16/S100A4/S100A6/S100A8/S100A9/SDCBP2/SECTM1/SEMA…	75
CC	GO:0005576	extracellular region	141/573	328/1648	0.000346323	0.0081386	0.0069099	ALYREF/APOA2/APOD/APOLD1/ARHGAP23/ARPC5/ATP6V0C/ATP6V1F/ATP6V1G1/B4GALT3/BASP1/BGLAP/BLOC1S1/BTG2/C11orf94/C17orf99/C1orf54/C1QTNF3/C3orf33/C5orf38/CCL28/CCL3L1/CD27/CD48/CD79B/CD9/CHMP3/CHMP4B/CREG1/DCXR/DDX5/DEFB124/DNAJB9/DNASE1L2/DPT/EFNA4/EIF6/EPO/F11R/FCGR3A/FGF10/FGF12/GDF11/GDNF/GFER/GH1/GHR/GNB4/GNG4/GRB2/HAPLN2/HCRT/HEBP1/HILPDA/HLA-DRB5/HSPB6/IFNG/IL10/IL20/IL23A/IL32/ITLN2/KISS1/KRTDA…	141
CC	GO:0005758	mitochondrial intermembrane space	9/573	10/1648	0.000491922	0.00985871	0.00837031	BLOC1S1/COX17/CYCS/GFER/GOLPH3/NDUFA8/THEM4/TIMM10/TIMM13	9
CC	GO:0031970	organelle envelope lumen	9/573	10/1648	0.000491922	0.00985871	0.00837031	BLOC1S1/COX17/CYCS/GFER/GOLPH3/NDUFA8/THEM4/TIMM10/TIMM13	9
CC	GO:0031974	membrane-enclosed lumen	167/573	400/1648	0.000514865	0.00985871	0.00837031	AEBP2/AGXT2/ALYREF/ANAPC11/ANP32E/APOA2/ARPC5/ATF6/ATOH8/BANF1/BASP1/BGLAP/BLOC1S1/BOLA3/BRIX1/BUD31/C19orf33/C1D/CAMK2N2/CAMKMT/CCDC91/CD79B/CHRAC1/CKS1B/CMAS/COMMD1/COX17/CPSF4/CREG1/CYCS/DDX5/DEDD/DNAJB9/DNAJC19/DNAJC21/DROSHA/DSCC1/DUSP12/DUSP23/EID2B/EIF6/ENSA/ETV4/EXOSC6/FAM32A/FKBP14/GATAD1/GDF11/GFER/GH1/GLRX2/GOLPH3/GRB2/HES1/HILPDA/HSBP1/HSPB6/IER5/IL23A/JMJD8/KPNA7/LIMD2/LIPT2/LITAF/LL…	167
CC	GO:0043233	organelle lumen	167/573	400/1648	0.000514865	0.00985871	0.00837031	AEBP2/AGXT2/ALYREF/ANAPC11/ANP32E/APOA2/ARPC5/ATF6/ATOH8/BANF1/BASP1/BGLAP/BLOC1S1/BOLA3/BRIX1/BUD31/C19orf33/C1D/CAMK2N2/CAMKMT/CCDC91/CD79B/CHRAC1/CKS1B/CMAS/COMMD1/COX17/CPSF4/CREG1/CYCS/DDX5/DEDD/DNAJB9/DNAJC19/DNAJC21/DROSHA/DSCC1/DUSP12/DUSP23/EID2B/EIF6/ENSA/ETV4/EXOSC6/FAM32A/FKBP14/GATAD1/GDF11/GFER/GH1/GLRX2/GOLPH3/GRB2/HES1/HILPDA/HSBP1/HSPB6/IER5/IL23A/JMJD8/KPNA7/LIMD2/LIPT2/LITAF/LL…	167
CC	GO:0070013	intracellular organelle lumen	167/573	400/1648	0.000514865	0.00985871	0.00837031	AEBP2/AGXT2/ALYREF/ANAPC11/ANP32E/APOA2/ARPC5/ATF6/ATOH8/BANF1/BASP1/BGLAP/BLOC1S1/BOLA3/BRIX1/BUD31/C19orf33/C1D/CAMK2N2/CAMKMT/CCDC91/CD79B/CHRAC1/CKS1B/CMAS/COMMD1/COX17/CPSF4/CREG1/CYCS/DDX5/DEDD/DNAJB9/DNAJC19/DNAJC21/DROSHA/DSCC1/DUSP12/DUSP23/EID2B/EIF6/ENSA/ETV4/EXOSC6/FAM32A/FKBP14/GATAD1/GDF11/GFER/GH1/GLRX2/GOLPH3/GRB2/HES1/HILPDA/HSBP1/HSPB6/IER5/IL23A/JMJD8/KPNA7/LIMD2/LIPT2/LITAF/LL…	167
CC	GO:0031982	vesicle	123/573	283/1648	0.000540359	0.00997735	0.00847104	ALYREF/ANP32E/APOA2/APOD/ARHGAP23/ARL14/ARPC5/ATP6V0C/ATP6V1F/ATP6V1G1/B4GALT3/BASP1/BGLAP/BRI3/BTG2/C1QTNF3/CACNG4/CALM2/CCL28/CD48/CD79B/CD9/CHMP3/CHMP4B/CNIH2/COMMD1/CREG1/DCXR/DDX5/DERL1/DNAJB9/EIF6/F11R/FCER1G/FCGR3A/GABARAPL1/GCGR/GH1/GNB4/GNG4/GNPNAT1/GOLPH3/GRB2/HCRT/HEBP1/HILPDA/HLA-DRB5/KREMEN2/KRTDAP/LAMTOR2/LAMTOR4/LGALS7B/LITAF/LPCAT1/LYZ/M6PR/MAP6D1/MGP/MORN2/NDFIP2/NDRG1/NDUFC2/NKD…	123
CC	GO:0015934	large ribosomal subunit	14/573	19/1648	0.00058203	0.0103762	0.00880968	MRPL12/MRPL36/MRPL41/MRPL48/MRPL51/MRPL9/RPL18/RPL27/RPL30/RPL36AL/RPL37/RPL38/RPL39L/RPL41	14
CC	GO:0098796	membrane protein complex	57/573	116/1648	0.000670715	0.0115587	0.00981362	ATP6V0C/ATP6V1F/ATP6V1G1/CACNG1/CACNG4/CALM2/CD247/CD79B/CDH12/CDH18/CHMP3/CHMP4B/CNIH2/COX6A1/COX6B2/COX6C/COX7A1/DERL1/DNAJC19/EFCAB9/FCER1G/FCGR3A/GNB4/GNG11/GNG4/GNGT2/GRB2/HLA-DRB5/KRTCAP2/LAMTOR2/LAMTOR4/NDUFA4L2/NDUFA8/NDUFB2/NDUFC2/NDUFS6/PIGC/ROMO1/S100A10/SDHC/SHC1/SLA2/SLC1A3/SNF8/SOCS1/SOCS3/SPTSSB/SRP9/STX6/TIMM10/TIMM17A/TOMM20/TOMM40L/TOMM7/VAMP4/VAMP8/VPS25	57
CC	GO:0098803	respiratory chain complex	10/573	12/1648	0.000766185	0.012778	0.0108489	COX6A1/COX6B2/COX6C/COX7A1/NDUFA4L2/NDUFA8/NDUFB2/NDUFC2/NDUFS6/SDHC	10
CC	GO:0005759	mitochondrial matrix	23/573	38/1648	0.00092173	0.0148917	0.0126435	AGXT2/BLOC1S1/DNAJC19/GLRX2/LIPT2/MCEE/MRPL12/MRPL36/MRPL41/MRPL48/MRPL51/MRPL9/MRPS14/MRPS21/MRPS33/MRPS34/MRPS35/MRPS7/OXCT1/PRDX5/SDHAF1/SHC1/THEM4	23
CC	GO:0070469	respirasome	11/573	14/1648	0.000991125	0.0155276	0.0131834	COX6A1/COX6B2/COX6C/COX7A1/CYCS/NDUFA4L2/NDUFA8/NDUFB2/NDUFC2/NDUFS6/SDHC	11
CC	GO:0005615	extracellular space	115/573	266/1648	0.00110371	0.0167829	0.0142491	ALYREF/APOA2/APOD/ARHGAP23/ARPC5/ATP6V0C/ATP6V1F/ATP6V1G1/B4GALT3/BASP1/BGLAP/BLOC1S1/BTG2/C17orf99/C1QTNF3/C3orf33/CCL28/CCL3L1/CD48/CD79B/CD9/CHMP3/CHMP4B/CREG1/DCXR/DDX5/DNAJB9/DPT/EIF6/EPO/F11R/FCGR3A/FGF10/FGF12/GDF11/GDNF/GFER/GH1/GHR/GNB4/GNG4/GRB2/HEBP1/HILPDA/HLA-DRB5/IFNG/IL10/IL20/IL23A/IL32/ITLN2/KISS1/KRTDAP/LEP/LGALS7B/LRRC3C/LYZ/METRN/MGP/NDRG1/NENF/NME1/NME2/NOG/NT5C/PATE4/PDCD5/P…	115
CC	GO:1990234	transferase complex	37/573	70/1648	0.00114683	0.0169403	0.0143828	AEBP2/AMN1/ANAPC11/ANAPC13/CALM2/CDK3/CHRAC1/CKS1B/COMMD1/DERL1/DPM3/ERC1/FBXL7/KCTD2/KRTCAP2/MED10/MED30/MSL1/NSMCE2/PIGC/PIGM/POLE4/POLR2J/POLR2J2/POLR2K/PRKAR1A/RNF168/RPRD1B/SKP2/SLA2/SNRPE/SNRPG/SOCS1/SOCS3/SPTSSB/YEATS4/YPEL5	37
CC	GO:0048471	perinuclear region of cytoplasm	29/573	52/1648	0.00131516	0.0180424	0.0153185	AANAT/APOD/BRI3/HCRT/M6PR/MLF1/MTPN/NDFIP2/NDRG1/NOS1AP/PRDX5/PRKCE/RAB40B/RAC3/REP15/S100A13/S100A14/S100A4/S100A6/SLC1A3/SLIRP/SNAPIN/SNF8/SRD5A1/STH/STX6/TSTD1/VAMP8/ZDHHC19	29
CC	GO:0140535	intracellular protein-containing complex	29/573	52/1648	0.00131516	0.0180424	0.0153185	AMN1/ANAPC11/ANAPC13/CHRAC1/CKS1B/COMMD1/DERL1/DPM3/FBXL7/KCTD2/LAMTOR2/LAMTOR4/MED10/MED30/MSL1/POLE4/POLR2J/POLR2J2/POLR2K/PPP3R1/PRKAR1A/PSMA7/RNASEH2C/RNF168/RPRD1B/SKP2/UCHL5/YEATS4/YPEL5	29
CC	GO:0005635	nuclear envelope	14/573	20/1648	0.00132613	0.0180424	0.0153185	ATF6/BANF1/CHMP3/CHMP4B/EIF5A2/GOLT1A/MAD1L1/MGST3/MRPS14/MRPS23/NOS1AP/RAB40B/S100A6/YEATS4	14
CC	GO:0000314	organellar small ribosomal subunit	6/573	6/1648	0.00173675	0.0224474	0.0190585	MRPS14/MRPS21/MRPS33/MRPS34/MRPS35/MRPS7	6
CC	GO:0005763	mitochondrial small ribosomal subunit	6/573	6/1648	0.00173675	0.0224474	0.0190585	MRPS14/MRPS21/MRPS33/MRPS34/MRPS35/MRPS7	6
CC	GO:0005746	mitochondrial respirasome	9/573	11/1648	0.00187101	0.0235929	0.0200311	COX6A1/COX6C/COX7A1/NDUFA4L2/NDUFA8/NDUFB2/NDUFC2/NDUFS6/SDHC	9
CC	GO:1990904	ribonucleoprotein complex	34/573	66/1648	0.00320509	0.0394531	0.0334968	ALYREF/BUD31/DDX5/EIF1/EIF3CL/EIF6/MAGOHB/MRPL12/MRPL36/MRPL41/MRPL48/MRPL51/MRPL9/MRPS14/MRPS21/MRPS33/MRPS34/MRPS35/MRPS7/MSI2/RPL18/RPL27/RPL30/RPL36AL/RPL37/RPL38/RPL39L/RPL41/RPS25/RPS27/SLIRP/SNRPE/SNRPG/SRP9	34
CC	GO:0005774	vacuolar membrane	19/573	32/1648	0.00353513	0.0425038	0.0360869	ATP6V0C/ATP6V1F/ATP6V1G1/BLOC1S1/BRI3/CHMP3/CHMP4B/GABARAPL1/GNB4/HLA-DRB5/LAMTOR2/LAMTOR4/LITAF/LPCAT1/M6PR/NDUFC2/SLC48A1/VAMP8/ZNRF2	19
MF	GO:0048306	calcium-dependent protein binding	15/559	15/1604	1.20043e-07	7.32262e-05	6.82349e-05	CALM2/RAC3/S100A10/S100A11/S100A12/S100A13/S100A14/S100A16/S100A2/S100A3/S100A4/S100A5/S100A6/S100A8/S100A9	15
MF	GO:0003735	structural constituent of ribosome	23/559	28/1604	3.02152e-07	9.21564e-05	8.58748e-05	MRPL12/MRPL36/MRPL41/MRPL51/MRPL9/MRPS14/MRPS21/MRPS23/MRPS33/MRPS34/MRPS35/MRPS7/RPL18/RPL22L1/RPL27/RPL30/RPL36AL/RPL37/RPL38/RPL39L/RPL41/RPS25/RPS27	23
MF	GO:0042802	identical protein binding	75/559	151/1604	5.91839e-05	0.0120341	0.0112138	ABI3/APOA2/ATF6/BANF1/BHLHA15/BNIPL/BRI3/C1QTNF3/CD247/CD79B/CDR2L/CHMP4B/CLDN1/CLEC2A/COMMD1/DCXR/DERL1/DROSHA/EID2B/F11R/FCER1G/FIS1/GDNF/GHR/GNPNAT1/GRB2/HES1/HMGCS1/HSBP1/HSD11B1/HSPB6/IAH1/IER5/KLRF2/LCE1B/LCE1E/LCE1F/LITAF/LYZ/MAD1L1/MAFG/MGST3/MIF4GD/MPC2/MSI2/NME1/NOG/NPL/NT5C/OXCT1/PIP/PSMA7/RBKS/ROPN1L/RPRD1B/S100A10/S100A11/S100A13/S100A16/S100A2/S100A4/S100A5/S100A6/SCHIP1/SDCBP2/SKP2…	75
MF	GO:0098772	molecular function regulator activity	80/559	167/1604	0.000164495	0.0231081	0.021533	ADAP1/ANP32E/APOA2/ARHGAP23/ARHGEF33/C17orf99/CACNG1/CACNG4/CALM2/CAMK2N2/CCL28/CCL3L1/CD27/CDC42SE1/CHN2/CKS1B/COMMD1/COX6A1/DNAJC19/DPM3/ENSA/EPO/FGF10/FGF12/GDF11/GDNF/GFER/GH1/HCRT/IFNG/IL10/IL20/IL23A/IL32/KRTCAP2/LAMTOR2/LAMTOR4/LEP/LY6E/MDK/METRN/MTMR12/MTRNR2L3/NENF/NMB/PATE4/PDCD5/PDE6G/PDE6H/PPP1R2/PPP1R27/PPP3R1/PPY/PRDX5/PRKAR1A/PRKCE/PTN/PYY/RAB1A/RABGAP1L/RAC3/RARRES1/RASAL2/RGL1/RP…	80
MF	GO:0043021	ribonucleoprotein complex binding	10/559	11/1604	0.000189411	0.0231081	0.021533	DDX5/DERL1/EIF1/EIF5A2/EIF6/MALSU1/NME1/SNRPG/SRP9/TACO1	10

## Sheet: Unprotected_GOenriched
ONTOLOGY	ID	Description	GeneRatio	BgRatio	pvalue	p.adjust	qvalue	geneID	Count
BP	GO:0050907	detection of chemical stimulus involved in sensory perception	105/1008	478/18800	1.53991e-36	5.71613e-33	5.3994e-33	ASIC3/GPR148/OR10A2/OR10A3/OR10AD1/OR10G2/OR10G4/OR10H1/OR10H5/OR10Q1/OR10S1/OR11H4/OR13A1/OR13D1/OR13G1/OR14A16/OR1E2/OR1F1/OR1G1/OR1J1/OR1J2/OR1J4/OR1K1/OR1L3/OR1L6/OR1L8/OR1M1/OR1N1/OR1N2/OR1Q1/OR2A14/OR2A4/OR2AG2/OR2B11/OR2B2/OR2B6/OR2C1/OR2D3/OR2H2/OR2J3/OR2K2/OR2L13/OR2L2/OR2L3/OR2T10/OR2T33/OR2T8/OR2W3/OR3A1/OR3A2/OR3A3/OR4C6/OR51B2/OR51B4/OR51B5/OR51B6/OR51E1/OR51E2/OR51I1/OR51I2/OR51M1/O…	105
BP	GO:0007608	sensory perception of smell	98/1008	458/18800	4.01301e-33	7.44815e-30	7.03544e-30	B2M/B3GNT2/FZD2/GJB4/GPR148/OMP/OR10A2/OR10A3/OR10AD1/OR10G2/OR10G4/OR10H1/OR10H5/OR10Q1/OR10S1/OR11H4/OR13A1/OR13D1/OR13G1/OR14A16/OR1E2/OR1F1/OR1G1/OR1J1/OR1J2/OR1J4/OR1K1/OR1L3/OR1L6/OR1L8/OR1M1/OR1N1/OR1N2/OR1Q1/OR2A14/OR2A4/OR2AG2/OR2B11/OR2B2/OR2B6/OR2C1/OR2D3/OR2H2/OR2J3/OR2K2/OR2L13/OR2L2/OR2L3/OR2T10/OR2T33/OR2T8/OR2W3/OR3A1/OR3A2/OR3A3/OR4C6/OR51B2/OR51B4/OR51B5/OR51B6/OR51E1/OR51E2/OR5…	98
BP	GO:0050911	detection of chemical stimulus involved in sensory perception of smell	93/1008	432/18800	1.12544e-31	1.39254e-28	1.31538e-28	GPR148/OR10A2/OR10A3/OR10AD1/OR10G2/OR10G4/OR10H1/OR10H5/OR10Q1/OR10S1/OR11H4/OR13A1/OR13D1/OR13G1/OR14A16/OR1E2/OR1F1/OR1G1/OR1J1/OR1J2/OR1J4/OR1K1/OR1L3/OR1L6/OR1L8/OR1M1/OR1N1/OR1N2/OR1Q1/OR2A14/OR2A4/OR2AG2/OR2B11/OR2B2/OR2B6/OR2C1/OR2D3/OR2H2/OR2J3/OR2K2/OR2L13/OR2L2/OR2L3/OR2T10/OR2T33/OR2T8/OR2W3/OR3A1/OR3A2/OR3A3/OR4C6/OR51B2/OR51B4/OR51B5/OR51B6/OR51E1/OR51E2/OR51I1/OR51I2/OR51M1/OR51Q1/…	93
BP	GO:0007187	G protein-coupled receptor signaling pathway, coupled to cyclic nucleotide second messenger	28/1008	67/18800	1.43654e-18	1.33311e-15	1.25924e-15	CCR1/CHRM1/CHRM3/CHRM5/CNR1/CNR2/DRD1/HRH1/HRH2/HTR1A/HTR1B/HTR1D/HTR1E/HTR1F/MC1R/MC2R/MC3R/MC5R/NPY1R/OR10H1/OR10H5/OR11H4/OR6T1/SSTR1/SSTR2/SSTR3/SSTR5/XCR1	28
BP	GO:0007188	adenylate cyclase-modulating G protein-coupled receptor signaling pathway	50/1008	244/18800	1.43293e-16	1.06381e-13	1.00486e-13	ADM/ADM2/ADRA2A/ADRA2B/ADRA2C/ADRB1/ADRB2/CCR3/CHRM1/CHRM3/CHRM5/CNR1/CNR2/DRD1/DRD5/FFAR3/FPR1/FPR2/GPR12/GPR3/GPR4/GPR6/GPR62/GPR65/GRM2/HTR1A/HTR1B/HTR1D/HTR1E/HTR1F/MC1R/MC2R/MC3R/MC4R/MC5R/MCHR1/NPY1R/NPY2R/OPRL1/OXER1/PLN/PSAPL1/S1PR1/S1PR2/S1PR3/S1PR4/S1PR5/SSTR2/UCN2/UCN3	50
BP	GO:0007189	adenylate cyclase-activating G protein-coupled receptor signaling pathway	31/1008	155/18800	1.65598e-10	1.00108e-07	9.45611e-08	ADM/ADM2/ADRA2A/ADRA2B/ADRA2C/ADRB1/ADRB2/CNR1/CNR2/DRD1/DRD5/GPR12/GPR3/GPR4/GPR6/GPR62/GPR65/MC1R/MC2R/MC3R/MC4R/MC5R/OPRL1/PLN/S1PR1/S1PR2/S1PR3/S1PR4/S1PR5/UCN2/UCN3	31
BP	GO:0048562	embryonic organ morphogenesis	45/1008	294/18800	1.88782e-10	1.00108e-07	9.45611e-08	APLNR/ATOH1/CITED2/FOXC2/FOXE1/FOXF1/FOXG1/FOXH1/FOXI1/FZD2/FZD5/GBX2/GJA1/GJB6/HAND2/HESX1/HMX2/HMX3/HOXA3/HOXB1/HOXB3/HOXB5/HOXC11/HOXC4/HOXD10/HOXD3/HOXD4/HOXD9/HYAL1/ID2/IRX5/LBX1/MYF5/NEUROD1/NKX2-5/OSR1/POU4F3/PPP1R35/SOX11/SOX18/SPRY2/TCF21/TIFAB/TSHZ1/ZIC1	45
BP	GO:0003002	regionalization	50/1008	354/18800	3.4111e-10	1.58275e-07	1.49505e-07	ASCL1/C1QA/CELSR2/CITED2/DMRTA2/EGR2/EOMES/FEZF1/FEZF2/FOXA1/FOXB1/FOXC2/FOXF1/FOXG1/FOXH1/FZD5/GBX2/GREM1/GREM2/GSX2/HELT/HES4/HOXA3/HOXB1/HOXB3/HOXB5/HOXC11/HOXC4/HOXC5/HOXC6/HOXD10/HOXD13/HOXD3/HOXD4/HOXD8/HOXD9/IRX1/MESP2/MSGN1/MYF5/MYF6/NEUROD1/NKX2-5/NTF4/OSR1/PCDH8/SPRY1/TDGF1/TIFAB/TSHZ1	50
BP	GO:0007193	adenylate cyclase-inhibiting G protein-coupled receptor signaling pathway	21/1008	78/18800	4.95856e-10	2.04513e-07	1.93181e-07	ADRA2A/CHRM1/CHRM3/CHRM5/FFAR3/FPR2/GRM2/HTR1A/HTR1B/HTR1D/HTR1E/HTR1F/MCHR1/NPY1R/NPY2R/OPRL1/OXER1/PSAPL1/S1PR1/S1PR3/SSTR2	21
BP	GO:0098664	G protein-coupled serotonin receptor signaling pathway	14/1008	35/18800	1.19522e-09	4.43666e-07	4.19082e-07	CHRM1/CHRM3/CHRM5/HRH1/HRH2/HTR1A/HTR1B/HTR1D/HTR1E/HTR1F/OR10H1/OR10H5/OR11H4/OR6T1	14
BP	GO:0007389	pattern specification process	58/1008	463/18800	1.49336e-09	5.03942e-07	4.76018e-07	APLNR/ASCL1/C1QA/CELSR2/CITED2/DMRTA2/EGR2/EOMES/FEZF1/FEZF2/FOXA1/FOXB1/FOXC2/FOXF1/FOXG1/FOXH1/FZD5/GBX2/GJA1/GREM1/GREM2/GSX2/HAND2/HELT/HES4/HOXA3/HOXB1/HOXB3/HOXB5/HOXC11/HOXC4/HOXC5/HOXC6/HOXD10/HOXD12/HOXD13/HOXD3/HOXD4/HOXD8/HOXD9/IRX1/LBX1/MESP2/MSGN1/MYF5/MYF6/NEUROD1/NKX2-5/NTF4/OOEP/OSR1/PCDH8/SOX18/SPRY1/TDGF1/TIFAB/TSHZ1/ZIC1	58
BP	GO:0009952	anterior/posterior pattern specification	35/1008	214/18800	3.38928e-09	1.04842e-06	9.90323e-07	CELSR2/FEZF1/FEZF2/FOXB1/FOXC2/FOXF1/FOXH1/FZD5/GBX2/HELT/HES4/HOXA3/HOXB1/HOXB3/HOXB5/HOXC11/HOXC4/HOXC5/HOXC6/HOXD10/HOXD13/HOXD3/HOXD4/HOXD8/HOXD9/MESP2/MSGN1/MYF5/MYF6/NEUROD1/OSR1/PCDH8/TDGF1/TIFAB/TSHZ1	35
BP	GO:0048568	embryonic organ development	55/1008	449/18800	8.87398e-09	2.46379e-06	2.32727e-06	ADM/APLNR/ATF4/ATOH1/CITED2/EOMES/FOXC2/FOXE1/FOXF1/FOXG1/FOXH1/FOXI1/FZD2/FZD5/GBX2/GJA1/GJB5/GJB6/HAND2/HESX1/HMX2/HMX3/HOXA3/HOXB1/HOXB3/HOXB5/HOXC11/HOXC4/HOXD10/HOXD3/HOXD4/HOXD9/HYAL1/ID2/ID3/IRX5/JUNB/LBX1/MYF5/NEUROD1/NKX2-5/OSR1/POU4F3/PPP1R35/SALL1/SOCS3/SOX11/SOX15/SOX18/SPRY2/TCF21/TIFAB/TRIM28/TSHZ1/ZIC1	55
BP	GO:0007210	serotonin receptor signaling pathway	14/1008	40/18800	9.29232e-09	2.46379e-06	2.32727e-06	CHRM1/CHRM3/CHRM5/HRH1/HRH2/HTR1A/HTR1B/HTR1D/HTR1E/HTR1F/OR10H1/OR10H5/OR11H4/OR6T1	14
BP	GO:0007200	phospholipase C-activating G protein-coupled receptor signaling pathway	22/1008	104/18800	2.53738e-08	6.27917e-06	5.93124e-06	ADRA2A/C3AR1/CHRM1/CMKLR1/CXCR2/DRD1/DRD5/FPR1/FPR2/FPR3/GNG13/GPR17/GPR27/GPR4/GPR55/GPR65/HRH1/LTB4R/MC3R/NMUR1/OPRL1/S1PR1	22
BP	GO:0007218	neuropeptide signaling pathway	22/1008	108/18800	5.21715e-08	1.21038e-05	1.14331e-05	CYSLTR2/ECEL1/GPR84/LTB4R/LTB4R2/MC2R/MCHR1/NMUR1/NPBWR2/NPPB/NPY1R/NPY2R/NPY5R/OPRL1/PMCH/PRLHR/QRFP/RXFP3/SSTR1/SSTR2/SSTR3/SSTR5	22
BP	GO:0070098	chemokine-mediated signaling pathway	19/1008	89/18800	1.93172e-07	4.21797e-05	3.98425e-05	CCR1/CCR2/CCR3/CCR4/CCR5/CCR6/CCR8/CCRL2/CMKLR1/CXCL1/CXCR1/CXCR2/CXCR4/CXCR6/GPR17/GPR75/PF4V1/PPBP/XCR1	19
BP	GO:0051480	regulation of cytosolic calcium ion concentration	43/1008	356/18800	5.48998e-07	0.000113216	0.000106942	ADM/APLNR/AVPR1A/BDKRB1/C3AR1/CCR1/CCR2/CCR3/CCR4/CCR5/CCR6/CCR8/CCRL2/CDK5/CMKLR1/CNR1/CXCR1/CXCR2/CXCR4/CXCR6/DRD1/FPR1/FPR2/FPR3/GP1BA/GPR17/GPR3/GPR4/GPR55/GPR6/GPR65/HRC/HTR1B/KCNA5/LIME1/MCHR1/OPRL1/P2RX2/PLN/S1PR1/S1PR3/S1PR4/XCR1	43
BP	GO:0007631	feeding behavior	20/1008	106/18800	7.66175e-07	0.000140063	0.000132302	ADM2/BBS12/CNR1/DRD1/HAND2/HELT/HTR1B/MC1R/MC3R/MC4R/MCHR1/NPY1R/NPY5R/OPRL1/PMCH/PRLH/PRLHR/QRFP/RETN/RMI1	20
BP	GO:1990868	response to chemokine	19/1008	97/18800	7.92383e-07	0.000140063	0.000132302	CCR1/CCR2/CCR3/CCR4/CCR5/CCR6/CCR8/CCRL2/CMKLR1/CXCL1/CXCR1/CXCR2/CXCR4/CXCR6/GPR17/GPR75/PF4V1/PPBP/XCR1	19
BP	GO:1990869	cellular response to chemokine	19/1008	97/18800	7.92383e-07	0.000140063	0.000132302	CCR1/CCR2/CCR3/CCR4/CCR5/CCR6/CCR8/CCRL2/CMKLR1/CXCL1/CXCR1/CXCR2/CXCR4/CXCR6/GPR17/GPR75/PF4V1/PPBP/XCR1	19
BP	GO:0007204	positive regulation of cytosolic calcium ion concentration	40/1008	325/18800	8.38336e-07	0.00014145	0.000133612	ADM/APLNR/AVPR1A/BDKRB1/C3AR1/CCR1/CCR2/CCR3/CCR4/CCR5/CCR6/CCR8/CCRL2/CDK5/CMKLR1/CNR1/CXCR1/CXCR2/CXCR4/CXCR6/DRD1/FPR1/FPR2/FPR3/GP1BA/GPR17/GPR4/GPR55/GPR6/GPR65/HRC/LIME1/MCHR1/OPRL1/P2RX2/PLN/S1PR1/S1PR3/S1PR4/XCR1	40
BP	GO:0006023	aminoglycan biosynthetic process	16/1008	80/18800	4.36874e-06	0.000699922	0.000661139	B3GALT6/B3GNT2/B3GNT7/B3GNT8/B3GNT9/CHPF/CHST1/CHST14/CHST2/CHST3/CHST5/CHST6/DSEL/HS3ST1/HS3ST5/HYAL1	16
BP	GO:0050909	sensory perception of taste	14/1008	63/18800	4.71391e-06	0.000699922	0.000661139	ASIC3/GNG13/P2RX2/TAS1R3/TAS2R1/TAS2R10/TAS2R13/TAS2R14/TAS2R20/TAS2R30/TAS2R31/TAS2R46/TAS2R50/TAS2R8	14
BP	GO:0051965	positive regulation of synapse assembly	14/1008	63/18800	4.71391e-06	0.000699922	0.000661139	AMIGO1/AMIGO2/AMIGO3/CBLN2/FLRT2/LINGO2/LRRC24/LRRN1/LRRN3/LRRTM1/LRRTM2/SLITRK1/SLITRK3/TPBG	14
BP	GO:1903351	cellular response to dopamine	17/1008	91/18800	5.86611e-06	0.0008375	0.000791093	ATF4/CHRM1/CHRM3/CHRM5/DRD1/DRD5/HRH1/HRH2/HTR1A/HTR1B/HTR1D/HTR1E/HTR1F/OR10H1/OR10H5/OR11H4/OR6T1	17
BP	GO:0019932	second-messenger-mediated signaling	36/1008	303/18800	6.59242e-06	0.000906335	0.000856115	ADM/APLNR/AVPR1A/C10orf71/CCR1/CCR2/CCR3/CCR4/CCR5/CCR6/CCR8/CCRL2/CHRM3/CMKLR1/CXCR1/CXCR2/CXCR4/CXCR6/FPR1/FPR2/GPR3/GPR61/GPR62/HRC/HRH1/NEUROD1/NMUR1/NPPB/OPRL1/OR51E2/P2RX2/PLN/RASD1/THBS1/TMEM100/XCR1	36
BP	GO:1903350	response to dopamine	17/1008	92/18800	6.84114e-06	0.00090694	0.000856686	ATF4/CHRM1/CHRM3/CHRM5/DRD1/DRD5/HRH1/HRH2/HTR1A/HTR1B/HTR1D/HTR1E/HTR1F/OR10H1/OR10H5/OR11H4/OR6T1	17
BP	GO:0051962	positive regulation of nervous system development	33/1008	270/18800	8.71377e-06	0.00111536	0.00105356	AMIGO1/AMIGO2/AMIGO3/ASCL1/CBLN2/CXCR4/DMRTA2/EGR2/ELL3/FLRT2/FOXG1/GSX2/ID2/ISLR2/KHDC3L/LIG4/LINGO2/LRRC24/LRRN1/LRRN3/LRRTM1/LRRTM2/LTA/NGF/NKX6-2/OBSL1/PLXNB2/SLITRK1/SLITRK3/SOX11/TLR2/TPBG/ZNF488	33
BP	GO:0009312	oligosaccharide biosynthetic process	9/1008	28/18800	9.67184e-06	0.00119673	0.00113042	B3GALT1/B3GALT4/B3GALT5/FUT1/FUT2/FUT3/FUT5/FUT6/FUT9	9
BP	GO:0050912	detection of chemical stimulus involved in sensory perception of taste	11/1008	43/18800	1.17584e-05	0.00137266	0.0012966	TAS1R3/TAS2R1/TAS2R10/TAS2R13/TAS2R14/TAS2R20/TAS2R30/TAS2R31/TAS2R46/TAS2R50/TAS2R8	11
BP	GO:0051960	regulation of nervous system development	46/1008	440/18800	1.18333e-05	0.00137266	0.0012966	AMIGO1/AMIGO2/AMIGO3/ASCL1/ATOH1/B2M/CBLN2/CDK5/CDK5R1/CXCR4/DMRTA2/EGR2/ELL3/FEZF1/FEZF2/FLRT2/FOXG1/GBX2/GSX2/HELT/HMGB2/HOXB3/ID2/ISLR2/KHDC3L/LIG4/LINGO2/LRRC24/LRRN1/LRRN3/LRRTM1/LRRTM2/LTA/NGF/NKX6-2/NSUN5/OBSL1/PLXNB2/SEMA6D/SLITRK1/SLITRK3/SOX11/SYT4/TLR2/TPBG/ZNF488	46
BP	GO:0055074	calcium ion homeostasis	48/1008	468/18800	1.27841e-05	0.00143802	0.00135834	ADM/APLNR/ATF4/AVPR1A/BDKRB1/C3AR1/CCR1/CCR2/CCR3/CCR4/CCR5/CCR6/CCR8/CCRL2/CDK5/CMKLR1/CNR1/CXCR1/CXCR2/CXCR4/CXCR6/CYP27B1/DRD1/DRD5/FPR1/FPR2/FPR3/GP1BA/GPR12/GPR17/GPR3/GPR4/GPR55/GPR6/GPR65/HRC/HTR1B/KCNA5/LIME1/MCHR1/OPRL1/P2RX2/PLN/S1PR1/S1PR3/S1PR4/TMEM203/XCR1	48
BP	GO:0006874	cellular calcium ion homeostasis	47/1008	456/18800	1.38236e-05	0.00150921	0.00142558	ADM/APLNR/ATF4/AVPR1A/BDKRB1/C3AR1/CCR1/CCR2/CCR3/CCR4/CCR5/CCR6/CCR8/CCRL2/CDK5/CMKLR1/CNR1/CXCR1/CXCR2/CXCR4/CXCR6/DRD1/DRD5/FPR1/FPR2/FPR3/GP1BA/GPR12/GPR17/GPR3/GPR4/GPR55/GPR6/GPR65/HRC/HTR1B/KCNA5/LIME1/MCHR1/OPRL1/P2RX2/PLN/S1PR1/S1PR3/S1PR4/TMEM203/XCR1	47
BP	GO:0001580	detection of chemical stimulus involved in sensory perception of bitter taste	10/1008	37/18800	1.7354e-05	0.00184051	0.00173853	TAS2R1/TAS2R10/TAS2R13/TAS2R14/TAS2R20/TAS2R30/TAS2R31/TAS2R46/TAS2R50/TAS2R8	10
BP	GO:0035296	regulation of tube diameter	21/1008	141/18800	2.01642e-05	0.00202296	0.00191086	ADM/ADRA2A/ADRA2B/ADRA2C/ADRB1/ADRB2/AVPR1A/CHRM3/DRD1/DRD5/FGA/FOXC2/GJA5/GPX1/HRH1/HRH2/HTR1A/HTR1B/HTR1D/KCNA5/NPPB	21
BP	GO:0097746	blood vessel diameter maintenance	21/1008	141/18800	2.01642e-05	0.00202296	0.00191086	ADM/ADRA2A/ADRA2B/ADRA2C/ADRB1/ADRB2/AVPR1A/CHRM3/DRD1/DRD5/FGA/FOXC2/GJA5/GPX1/HRH1/HRH2/HTR1A/HTR1B/HTR1D/KCNA5/NPPB	21
BP	GO:0035150	regulation of tube size	21/1008	142/18800	2.24902e-05	0.00219693	0.0020752	ADM/ADRA2A/ADRA2B/ADRA2C/ADRB1/ADRB2/AVPR1A/CHRM3/DRD1/DRD5/FGA/FOXC2/GJA5/GPX1/HRH1/HRH2/HTR1A/HTR1B/HTR1D/KCNA5/NPPB	21
BP	GO:0009311	oligosaccharide metabolic process	13/1008	63/18800	2.40182e-05	0.00228604	0.00215937	B3GALT1/B3GALT4/B3GALT5/FUT1/FUT2/FUT3/FUT5/FUT6/FUT9/MOGS/NEU2/NEU4/ST8SIA3	13
BP	GO:0042310	vasoconstriction	15/1008	82/18800	2.66238e-05	0.00247068	0.00233378	ADM/ADRA2A/ADRA2B/ADRA2C/AVPR1A/CHRM3/DRD5/FGA/GJA5/HRH1/HRH2/HTR1A/HTR1B/HTR1D/KCNA5	15
BP	GO:0045776	negative regulation of blood pressure	11/1008	47/18800	2.92368e-05	0.002647	0.00250033	ADM2/ADRB1/ADRB2/BDKRB1/CNR1/DRD5/FFAR3/GJA5/NPPB/OPRL1/PTAFR	11
BP	GO:0048704	embryonic skeletal system morphogenesis	16/1008	94/18800	3.67526e-05	0.00324823	0.00306825	FOXC2/HOXA3/HOXB1/HOXB3/HOXB5/HOXC11/HOXC4/HOXD10/HOXD3/HOXD4/HOXD9/HYAL1/IRX5/MYF5/OSR1/SOX11	16
BP	GO:0071868	cellular response to monoamine stimulus	17/1008	105/18800	4.12802e-05	0.00348255	0.00328958	ATF4/CHRM1/CHRM3/CHRM5/DRD1/DRD5/HRH1/HRH2/HTR1A/HTR1B/HTR1D/HTR1E/HTR1F/OR10H1/OR10H5/OR11H4/OR6T1	17
BP	GO:0071870	cellular response to catecholamine stimulus	17/1008	105/18800	4.12802e-05	0.00348255	0.00328958	ATF4/CHRM1/CHRM3/CHRM5/DRD1/DRD5/HRH1/HRH2/HTR1A/HTR1B/HTR1D/HTR1E/HTR1F/OR10H1/OR10H5/OR11H4/OR6T1	17
BP	GO:0006024	glycosaminoglycan biosynthetic process	14/1008	76/18800	4.52347e-05	0.00365552	0.00345296	B3GALT6/B3GNT2/B3GNT7/CHPF/CHST1/CHST14/CHST2/CHST3/CHST5/CHST6/DSEL/HS3ST1/HS3ST5/HYAL1	14
BP	GO:0050913	sensory perception of bitter taste	10/1008	41/18800	4.59339e-05	0.00365552	0.00345296	TAS2R1/TAS2R10/TAS2R13/TAS2R14/TAS2R20/TAS2R30/TAS2R31/TAS2R46/TAS2R50/TAS2R8	10
BP	GO:0048706	embryonic skeletal system development	19/1008	127/18800	4.62848e-05	0.00365552	0.00345296	FOXC2/HAND2/HOXA3/HOXB1/HOXB3/HOXB5/HOXC11/HOXC4/HOXC5/HOXC6/HOXD10/HOXD3/HOXD4/HOXD9/HYAL1/IRX5/MYF5/OSR1/SOX11	19
BP	GO:0072503	cellular divalent inorganic cation homeostasis	48/1008	494/18800	5.11375e-05	0.00395464	0.00373551	ADM/APLNR/ATF4/AVPR1A/BDKRB1/C3AR1/CCR1/CCR2/CCR3/CCR4/CCR5/CCR6/CCR8/CCRL2/CDK5/CMKLR1/CNR1/CXCR1/CXCR2/CXCR4/CXCR6/DRD1/DRD5/FPR1/FPR2/FPR3/GP1BA/GPR12/GPR17/GPR3/GPR4/GPR55/GPR6/GPR65/HRC/HTR1B/KCNA5/LIME1/MCHR1/OPRL1/P2RX2/PLN/S1PR1/S1PR3/S1PR4/SLC39A4/TMEM203/XCR1	48
BP	GO:0071880	adenylate cyclase-activating adrenergic receptor signaling pathway	8/1008	27/18800	5.91178e-05	0.00434093	0.0041004	ADRA2A/ADRA2B/ADRA2C/ADRB1/ADRB2/DRD1/DRD5/PLN	8
BP	GO:0071867	response to monoamine	17/1008	108/18800	5.9641e-05	0.00434093	0.0041004	ATF4/CHRM1/CHRM3/CHRM5/DRD1/DRD5/HRH1/HRH2/HTR1A/HTR1B/HTR1D/HTR1E/HTR1F/OR10H1/OR10H5/OR11H4/OR6T1	17
BP	GO:0071869	response to catecholamine	17/1008	108/18800	5.9641e-05	0.00434093	0.0041004	ATF4/CHRM1/CHRM3/CHRM5/DRD1/DRD5/HRH1/HRH2/HTR1A/HTR1B/HTR1D/HTR1E/HTR1F/OR10H1/OR10H5/OR11H4/OR6T1	17
BP	GO:0001764	neuron migration	22/1008	164/18800	6.67366e-05	0.00476397	0.0045	ASCL1/ATOH1/BARHL2/CCR4/CDK5/CDK5R1/CDK5R2/CELSR2/CXCR4/DDIT4/DRD1/FEZF1/FEZF2/FLRT2/FOXG1/GJA1/NDN/NEUROD4/OLIG3/PLXNB2/SCRT1/SOX14	22
BP	GO:0015669	gas transport	7/1008	21/18800	7.46987e-05	0.00523173	0.00494184	AQP4/AQP6/HBA1/HBA2/HBG2/HBM/HBQ1	7
BP	GO:0045666	positive regulation of neuron differentiation	15/1008	91/18800	9.33276e-05	0.00641541	0.00605992	ADRA2B/ADRA2C/ASCL1/ATOH1/DUOXA1/FEZF1/FEZF2/FOXA1/FOXG1/HOXD3/NEUROD1/NEUROG3/NGF/NKX2-5/SOX11	15
BP	GO:0048663	neuron fate commitment	12/1008	63/18800	0.000111672	0.00753683	0.00711921	ASCL1/ATOH1/DMRTA2/FEZF2/FOXA1/FOXG1/GSX2/HOXD10/ID2/LBX1/OLIG3/POU3F2	12
BP	GO:0019229	regulation of vasoconstriction	12/1008	64/18800	0.000130824	0.00867178	0.00819127	ADM/ADRA2A/ADRA2B/ADRA2C/AVPR1A/CHRM3/FGA/GJA5/HRH1/HRH2/HTR1A/KCNA5	12
BP	GO:0048665	neuron fate specification	8/1008	30/18800	0.000135019	0.0086766	0.00819583	ASCL1/ATOH1/DMRTA2/FOXA1/GSX2/HOXD10/OLIG3/POU3F2	8
BP	GO:0042743	hydrogen peroxide metabolic process	11/1008	55/18800	0.000135572	0.0086766	0.00819583	APOA4/CYP1A1/CYP1A2/DUOXA1/DUOXA2/GPX1/HBA1/HBA2/HBG2/HBM/HBQ1	11
BP	GO:0051482	positive regulation of cytosolic calcium ion concentration involved in phospholipase C-activating G protein-coupled signaling pathway	8/1008	32/18800	0.000220542	0.0138755	0.0131066	C3AR1/DRD1/GPR17/GPR4/GPR55/GPR65/OPRL1/S1PR1	8
BP	GO:0007422	peripheral nervous system development	13/1008	78/18800	0.000240279	0.0148652	0.0140415	CDK5/CITED2/EGR2/EGR3/HAND2/HOXD10/HOXD9/LAMB2/NEUROG3/NGF/NHLH2/NTF4/POU3F2	13
BP	GO:1901071	glucosamine-containing compound metabolic process	7/1008	25/18800	0.000255739	0.0155623	0.0147	CHST1/CHST2/CHST3/CHST4/CHST5/CHST6/MGAT3	7
BP	GO:0007416	synapse assembly	22/1008	180/18800	0.000263159	0.0157556	0.0148825	AMIGO1/AMIGO2/AMIGO3/CBLN2/CDK5/DRD1/FLRT2/FZD5/GJA10/LINGO2/LRRC24/LRRC4/LRRN1/LRRN3/LRRTM1/LRRTM2/OBSL1/PLXNB2/SLITRK1/SLITRK3/TLR2/TPBG	22
BP	GO:0050795	regulation of behavior	12/1008	69/18800	0.000274444	0.0160982	0.0152062	ADRB1/CNR1/HTR1A/HTR1B/HTR1D/MC1R/MC3R/MC4R/OPRL1/QRFP/RAG1/RETN	12
BP	GO:0071875	adrenergic receptor signaling pathway	8/1008	33/18800	0.000277555	0.0160982	0.0152062	ADRA2A/ADRA2B/ADRA2C/ADRB1/ADRB2/DRD1/DRD5/PLN	8
BP	GO:0006936	muscle contraction	35/1008	349/18800	0.000283805	0.0162074	0.0153094	ACTA1/ADRA2A/ADRA2B/ADRA2C/ADRB2/CHRM3/CHRNE/CHRNG/CXCR4/DRD1/GJA1/GJA5/GJC1/HRC/HTR1D/KCNA1/KCNA5/KCNE1/KCNE3/KCNE4/KCNJ12/KCNJ2/LTB4R/MYH1/MYH4/MYH8/NKX2-5/NMUR1/P2RX2/PLN/PTAFR/RANGRF/SSTR2/TIFAB/TTN	35
BP	GO:0034329	cell junction assembly	40/1008	420/18800	0.000318197	0.0178962	0.0169045	ACTB/AMIGO1/AMIGO2/AMIGO3/APLNR/CBLN2/CDK5/CLDN14/CLDN20/CLDN23/CLDN6/CLDN8/CLDN9/DRD1/FLRT2/FZD5/GJA1/GJA10/GJA4/GJA5/GJB2/GJB6/GJC1/GPBAR1/GREM1/LINGO2/LRRC24/LRRC4/LRRN1/LRRN3/LRRTM1/LRRTM2/OBSL1/PLXNB2/RHOC/SLITRK1/SLITRK3/THBS1/TLR2/TPBG	40
BP	GO:0002407	dendritic cell chemotaxis	7/1008	26/18800	0.00033388	0.0184979	0.0174729	CCR1/CCR2/CCR5/CCR6/CXCR1/CXCR2/CXCR4	7
BP	GO:0035282	segmentation	15/1008	103/18800	0.000381692	0.0205339	0.0193961	EGR2/FOXB1/FOXC2/FOXF1/FZD5/HOXD8/IRX1/MESP2/MSGN1/MYF5/MYF6/OSR1/PCDH8/TDGF1/TIFAB	15
BP	GO:0051963	regulation of synapse assembly	15/1008	103/18800	0.000381692	0.0205339	0.0193961	AMIGO1/AMIGO2/AMIGO3/CBLN2/FLRT2/LINGO2/LRRC24/LRRN1/LRRN3/LRRTM1/LRRTM2/SLITRK1/SLITRK3/TLR2/TPBG	15
BP	GO:0042501	serine phosphorylation of STAT protein	7/1008	27/18800	0.000430046	0.0224835	0.0212377	CDK5/CDK5R1/IFNA1/IFNA21/IFNA5/IFNB1/IFNE	7
BP	GO:0051953	negative regulation of amine transport	7/1008	27/18800	0.000430046	0.0224835	0.0212377	ADRA2A/ADRA2B/ADRA2C/CNR1/HTR1B/NPY5R/SYT4	7
BP	GO:0015844	monoamine transport	13/1008	83/18800	0.00045013	0.0232067	0.0219208	ACTB/ADRA2A/ADRA2B/ADRA2C/CHRM5/CNR1/DRD1/FFAR3/GRM2/HTR1A/HTR1B/LILRB1/SYT4	13
BP	GO:0045165	cell fate commitment	28/1008	266/18800	0.000519296	0.0263041	0.0248466	ASCL1/ATOH1/BARHL2/DMRTA2/EOMES/FEZF2/FOXA1/FOXC2/FOXG1/FZD7/GSX2/HOXD10/ID2/KDM6B/LBX1/MYF5/MYF6/NEUROD1/NEUROD4/NKX2-5/NKX6-2/NTF4/OLIG3/POU3F2/SOX12/SOX18/SPN/SPRY2	28
BP	GO:0045777	positive regulation of blood pressure	8/1008	36/18800	0.000524381	0.0263041	0.0248466	ADRA2B/ADRB1/AVPR1A/CNR1/DRD5/ID2/OR51E2/QRFP	8
BP	GO:0019722	calcium-mediated signaling	23/1008	202/18800	0.000538685	0.0266613	0.025184	AVPR1A/C10orf71/CCR1/CCR2/CCR3/CCR4/CCR5/CCR6/CCR8/CCRL2/CHRM3/CMKLR1/CXCR1/CXCR2/CXCR4/CXCR6/FPR2/HRC/NMUR1/P2RX2/PLN/TMEM100/XCR1	23
BP	GO:0019233	sensory perception of pain	14/1008	99/18800	0.000796961	0.0389253	0.0367684	ASIC3/BDKRB1/CCR2/CDK5/CNR1/CNR2/CXCR4/KCNA1/MC1R/NDN/NPY1R/OPRL1/PTAFR/TMEM100	14
BP	GO:0042744	hydrogen peroxide catabolic process	7/1008	30/18800	0.000856462	0.0411788	0.038897	APOA4/GPX1/HBA1/HBA2/HBG2/HBM/HBQ1	7
BP	GO:0016051	carbohydrate biosynthetic process	23/1008	209/18800	0.000865286	0.0411788	0.038897	ATF4/B3GALT1/B3GALT4/B3GALT5/B3GNT2/B3GNT7/B3GNT8/B3GNT9/CHST14/EPM2AIP1/FUT1/FUT2/FUT3/FUT5/FUT6/FUT9/GPT/HRH1/IRS1/MST1/PGK2/PPP1R3B/PTAFR	23
BP	GO:0009101	glycoprotein biosynthetic process	31/1008	316/18800	0.000888573	0.0417517	0.0394382	B3GALT1/B3GALT4/B3GALT5/B3GALT6/B3GNT2/B3GNT7/B3GNT8/B3GNT9/CHPF/CHST14/CHST3/CHST4/DOLK/DSEL/FOXL1/FUT1/FUT2/FUT3/FUT5/FUT6/FUT9/GALNT4/GCNT1/GCNT3/GCNT4/HS3ST5/MGAT1/MGAT3/MOGS/PHLDA1/ST8SIA3	31
BP	GO:0022029	telencephalon cell migration	10/1008	58/18800	0.000935487	0.0434066	0.0410014	CDK5/CDK5R1/CDK5R2/CXCR4/DRD1/FEZF2/FOXB1/FOXG1/POU3F2/POU3F3	10
BP	GO:0061844	antimicrobial humoral immune response mediated by antimicrobial peptide	12/1008	79/18800	0.00097543	0.0447012	0.0422242	ANG/CXCL1/DEFA4/DEFB126/PF4V1/PPBP/REG1A/REG3A/RNASE3/RNASE6/RNASE7/SEMG1	12
BP	GO:0006486	protein glycosylation	24/1008	225/18800	0.00104893	0.0468927	0.0442943	B3GALT1/B3GALT4/B3GALT5/B3GALT6/B3GNT2/B3GNT7/B3GNT8/B3GNT9/CHST4/DOLK/FUT1/FUT2/FUT3/FUT5/FUT6/FUT9/GALNT4/GCNT1/GCNT3/GCNT4/MGAT1/MGAT3/MOGS/ST8SIA3	24
BP	GO:0043413	macromolecule glycosylation	24/1008	225/18800	0.00104893	0.0468927	0.0442943	B3GALT1/B3GALT4/B3GALT5/B3GALT6/B3GNT2/B3GNT7/B3GNT8/B3GNT9/CHST4/DOLK/FUT1/FUT2/FUT3/FUT5/FUT6/FUT9/GALNT4/GCNT1/GCNT3/GCNT4/MGAT1/MGAT3/MOGS/ST8SIA3	24
BP	GO:0007586	digestion	17/1008	137/18800	0.00106431	0.0468927	0.0442943	ADM2/ADRA2A/AMY2A/APOA4/CHRM1/CHRM3/CHRM5/CYP8B1/GCNT3/HRH2/NEUROD1/OPRL1/PRSS1/TIFAB/TLR9/UCN2/UCN3	17
BP	GO:0016338	calcium-independent cell-cell adhesion via plasma membrane cell-adhesion molecules	6/1008	23/18800	0.00107463	0.0468927	0.0442943	CLDN14/CLDN20/CLDN23/CLDN6/CLDN8/CLDN9	6
BP	GO:0003151	outflow tract morphogenesis	12/1008	80/18800	0.00109267	0.0468927	0.0442943	CITED2/FOXC2/FOXH1/FZD2/GJA5/HAND2/NKX2-5/NPY1R/NPY2R/NPY5R/SOX11/SOX18	12
BP	GO:0007517	muscle organ development	32/1008	334/18800	0.00109905	0.0468927	0.0442943	ACTA1/ACTC1/ANKRD33/CDK5/CITED2/DMRTA2/EGR1/EGR2/EGR3/EOMES/FHL3/FOXC2/FOXH1/FZD2/GJA1/GPX1/HOXD10/HOXD9/ID3/LBX1/MYF5/MYF6/NKX2-5/P2RX2/POPDC3/S1PR1/SOX11/SOX15/TCF21/TIFAB/TTN/USP19	32
BP	GO:0060537	muscle tissue development	37/1008	405/18800	0.00112947	0.0476432	0.0450033	ACTA1/ACTC1/ANKRD33/CDK5/CITED2/DMRTA2/EGR1/EGR2/EOMES/FOXC2/FOXH1/FZD7/GJA1/GJA5/GJB6/GJC1/GPX1/GREM1/HOXD10/HOXD9/ID2/KDM6B/MYF5/MYF6/NKX2-5/NPPB/OBSL1/OSR1/P2RX2/PLN/POPDC3/S1PR1/SOX11/SOX15/TCF21/TTN/USP19	37
CC	GO:0005922	connexin complex	14/1086	21/19594	1.92094e-13	8.24083e-11	8.24083e-11	GJA1/GJA10/GJA4/GJA5/GJA8/GJA9/GJB2/GJB3/GJB4/GJB5/GJB6/GJB7/GJC1/GJD2	14
CC	GO:0005921	gap junction	14/1086	32/19594	4.38005e-10	9.39522e-08	9.39522e-08	GJA1/GJA10/GJA4/GJA5/GJA8/GJA9/GJB2/GJB3/GJB4/GJB5/GJB6/GJB7/GJC1/GJD2	14
CC	GO:0034705	potassium channel complex	15/1086	89/19594	0.000104253	0.0149081	0.0149081	CCDC51/KCNA1/KCNA10/KCNA3/KCNA4/KCNA5/KCNA7/KCNE1/KCNF1/KCNJ11/KCNJ16/KCNJ2/KCNJ4/KCNS2/KCNS3	15
CC	GO:0008076	voltage-gated potassium channel complex	13/1086	79/19594	0.000377279	0.0404632	0.0404632	KCNA1/KCNA10/KCNA3/KCNA4/KCNA5/KCNA7/KCNE1/KCNF1/KCNJ16/KCNJ2/KCNJ4/KCNS2/KCNS3	13
MF	GO:0004984	olfactory receptor activity	93/1053	430/18410	1.10268e-29	6.36245e-27	5.89642e-27	GPR148/OR10A2/OR10A3/OR10AD1/OR10G2/OR10G4/OR10H1/OR10H5/OR10Q1/OR10S1/OR11H4/OR13A1/OR13D1/OR13G1/OR14A16/OR1E2/OR1F1/OR1G1/OR1J1/OR1J2/OR1J4/OR1K1/OR1L3/OR1L6/OR1L8/OR1M1/OR1N1/OR1N2/OR1Q1/OR2A14/OR2A4/OR2AG2/OR2B11/OR2B2/OR2B6/OR2C1/OR2D3/OR2H2/OR2J3/OR2K2/OR2L13/OR2L2/OR2L3/OR2T10/OR2T33/OR2T8/OR2W3/OR3A1/OR3A2/OR3A3/OR4C6/OR51B2/OR51B4/OR51B5/OR51B6/OR51E1/OR51E2/OR51I1/OR51I2/OR51M1/OR51Q1/…	93
MF	GO:0008528	G protein-coupled peptide receptor activity	46/1053	148/18410	4.65391e-22	1.34265e-19	1.24431e-19	APLNR/AVPR1A/BDKRB1/CCR1/CCR2/CCR3/CCR4/CCR5/CCR6/CCR8/CCRL2/CMKLR1/CXCR1/CXCR2/CXCR4/CXCR6/CYSLTR2/FPR1/FPR2/FPR3/GP1BA/GPR17/GPR75/GPR84/LTB4R/LTB4R2/MC1R/MC2R/MC3R/MC4R/MC5R/MCHR1/NMUR1/NPBWR2/NPY1R/NPY2R/NPY5R/OPRL1/PRLHR/RXFP3/S1PR2/SSTR1/SSTR2/SSTR3/SSTR5/XCR1	46
MF	GO:0001653	peptide receptor activity	46/1053	154/18410	2.92984e-21	5.63505e-19	5.2223e-19	APLNR/AVPR1A/BDKRB1/CCR1/CCR2/CCR3/CCR4/CCR5/CCR6/CCR8/CCRL2/CMKLR1/CXCR1/CXCR2/CXCR4/CXCR6/CYSLTR2/FPR1/FPR2/FPR3/GP1BA/GPR17/GPR75/GPR84/LTB4R/LTB4R2/MC1R/MC2R/MC3R/MC4R/MC5R/MCHR1/NMUR1/NPBWR2/NPY1R/NPY2R/NPY5R/OPRL1/PRLHR/RXFP3/S1PR2/SSTR1/SSTR2/SSTR3/SSTR5/XCR1	46
MF	GO:0001637	G protein-coupled chemoattractant receptor activity	16/1053	26/18410	3.62832e-14	4.18708e-12	3.8804e-12	CCR1/CCR2/CCR3/CCR4/CCR5/CCR6/CCR8/CCRL2/CMKLR1/CXCR1/CXCR2/CXCR4/CXCR6/GPR17/GPR75/XCR1	16
MF	GO:0004950	chemokine receptor activity	16/1053	26/18410	3.62832e-14	4.18708e-12	3.8804e-12	CCR1/CCR2/CCR3/CCR4/CCR5/CCR6/CCR8/CCRL2/CMKLR1/CXCR1/CXCR2/CXCR4/CXCR6/GPR17/GPR75/XCR1	16
MF	GO:0005243	gap junction channel activity	14/1053	21/18410	2.9422e-13	2.82941e-11	2.62217e-11	GJA1/GJA10/GJA4/GJA5/GJA8/GJA9/GJB2/GJB3/GJB4/GJB5/GJB6/GJB7/GJC1/GJD2	14
MF	GO:0008227	G protein-coupled amine receptor activity	20/1053	51/18410	1.67245e-12	1.33848e-10	1.24044e-10	ADRA2A/ADRA2B/ADRA2C/ADRB1/ADRB2/CHRM1/CHRM3/CHRM5/HRH1/HRH2/HTR1A/HTR1B/HTR1D/HTR1E/HTR1F/OR10H1/OR10H5/OR11H4/OR6T1/TAAR1	20
MF	GO:0016493	C-C chemokine receptor activity	14/1053	23/18410	1.85577e-12	1.33848e-10	1.24044e-10	CCR1/CCR2/CCR3/CCR4/CCR5/CCR6/CCR8/CCRL2/CXCR1/CXCR2/CXCR4/CXCR6/GPR75/XCR1	14
MF	GO:0022829	wide pore channel activity	15/1053	30/18410	1.43424e-11	9.19505e-10	8.52155e-10	GJA1/GJA10/GJA4/GJA5/GJA8/GJA9/GJB2/GJB3/GJB4/GJB5/GJB6/GJB7/GJC1/GJD2/PRF1	15
MF	GO:0019957	C-C chemokine binding	13/1053	24/18410	9.02412e-11	5.20692e-09	4.82553e-09	CCR1/CCR2/CCR3/CCR4/CCR5/CCR6/CCR8/CCRL2/CXCR1/CXCR2/CXCR4/CXCR6/XCR1	13
MF	GO:0042923	neuropeptide binding	14/1053	32/18410	6.58477e-10	3.45401e-08	3.20102e-08	MC3R/MC4R/MCHR1/NMUR1/NPBWR2/NPY1R/NPY2R/NPY5R/OPRL1/PRLHR/SSTR1/SSTR2/SSTR3/SSTR5	14
MF	GO:0004993	G protein-coupled serotonin receptor activity	14/1053	34/18410	1.74543e-09	7.74701e-08	7.17957e-08	CHRM1/CHRM3/CHRM5/HRH1/HRH2/HTR1A/HTR1B/HTR1D/HTR1E/HTR1F/OR10H1/OR10H5/OR11H4/OR6T1	14
MF	GO:0099589	serotonin receptor activity	14/1053	34/18410	1.74543e-09	7.74701e-08	7.17957e-08	CHRM1/CHRM3/CHRM5/HRH1/HRH2/HTR1A/HTR1B/HTR1D/HTR1E/HTR1F/OR10H1/OR10H5/OR11H4/OR6T1	14
MF	GO:0019956	chemokine binding	13/1053	33/18410	1.2778e-08	5.26636e-07	4.88061e-07	CCR1/CCR2/CCR3/CCR4/CCR5/CCR6/CCR8/CCRL2/CXCR1/CXCR2/CXCR4/CXCR6/XCR1	13
MF	GO:0033038	bitter taste receptor activity	10/1053	20/18410	3.92155e-08	1.50849e-06	1.398e-06	TAS2R1/TAS2R10/TAS2R13/TAS2R14/TAS2R20/TAS2R30/TAS2R31/TAS2R46/TAS2R50/TAS2R8	10
MF	GO:0008527	taste receptor activity	11/1053	26/18410	7.09905e-08	2.5601e-06	2.37258e-06	TAS1R3/TAS2R1/TAS2R10/TAS2R13/TAS2R14/TAS2R20/TAS2R30/TAS2R31/TAS2R46/TAS2R50/TAS2R8	11
MF	GO:0001228	DNA-binding transcription activator activity, RNA polymerase II-specific	55/1053	462/18410	2.02525e-07	6.87392e-06	6.37043e-06	ATF4/ATOH1/BARHL2/CEBPE/CSRNP1/EGR1/EGR2/EGR3/FEZF2/FOXA1/FOXC2/FOXD2/FOXF1/FOXH1/FOXI1/GBX2/HAND2/HOXB1/HOXB3/HOXB5/HOXC11/HOXC4/HOXD10/HOXD13/HOXD3/HOXD4/HOXD8/JUNB/MSGN1/MYF5/MYF6/NDN/NEUROD1/NEUROG3/NHLH1/NHLH2/NKX2-5/POU3F2/POU4F3/SOX11/SOX12/SOX18/TCF21/ZBED4/ZBTB17/ZIC1/ZNF319/ZNF345/ZNF594/ZNF600/ZNF629/ZNF668/ZNF71/ZNF750/ZNF770	55
MF	GO:0001216	DNA-binding transcription activator activity	55/1053	466/18410	2.68621e-07	8.61078e-06	7.98007e-06	ATF4/ATOH1/BARHL2/CEBPE/CSRNP1/EGR1/EGR2/EGR3/FEZF2/FOXA1/FOXC2/FOXD2/FOXF1/FOXH1/FOXI1/GBX2/HAND2/HOXB1/HOXB3/HOXB5/HOXC11/HOXC4/HOXD10/HOXD13/HOXD3/HOXD4/HOXD8/JUNB/MSGN1/MYF5/MYF6/NDN/NEUROD1/NEUROG3/NHLH1/NHLH2/NKX2-5/POU3F2/POU4F3/SOX11/SOX12/SOX18/TCF21/ZBED4/ZBTB17/ZIC1/ZNF319/ZNF345/ZNF594/ZNF600/ZNF629/ZNF668/ZNF71/ZNF750/ZNF770	55
MF	GO:0005249	voltage-gated potassium channel activity	19/1053	91/18410	7.45597e-07	2.26426e-05	2.09841e-05	KCNA1/KCNA10/KCNA3/KCNA4/KCNA5/KCNA7/KCNE1/KCNE3/KCNE4/KCNF1/KCNJ11/KCNJ12/KCNJ13/KCNJ15/KCNJ16/KCNJ2/KCNJ4/KCNS2/KCNS3	19
MF	GO:0030594	neurotransmitter receptor activity	20/1053	111/18410	4.35781e-06	0.000125723	0.000116514	ADRB1/CHRM1/CHRM3/CHRM5/CHRNE/CHRNG/DRD1/DRD5/GABRD/HRH1/HRH2/HTR1A/HTR1B/HTR1D/HTR1E/HTR1F/OR10H1/OR10H5/OR11H4/OR6T1	20
MF	GO:0008188	neuropeptide receptor activity	12/1053	45/18410	5.70888e-06	0.000156858	0.000145369	MC2R/MCHR1/NMUR1/NPBWR2/NPY1R/NPY2R/NPY5R/PRLHR/SSTR1/SSTR2/SSTR3/SSTR5	12
MF	GO:0005251	delayed rectifier potassium channel activity	10/1053	33/18410	9.92444e-06	0.000260291	0.000241226	KCNA1/KCNA10/KCNA3/KCNA4/KCNA5/KCNA7/KCNE1/KCNE3/KCNE4/KCNS3	10
MF	GO:0005549	odorant binding	20/1053	119/18410	1.2921e-05	0.000324147	0.000300405	GPR148/OR10Q1/OR13A1/OR13G1/OR14A16/OR1K1/OR2A4/OR2C1/OR5B12/OR5B21/OR5C1/OR5K2/OR5M11/OR5P2/OR5P3/OR6B2/OR6B3/OR6K3/OR8A1/OR8D1	20
MF	GO:0005267	potassium channel activity	20/1053	121/18410	1.66629e-05	0.000400603	0.00037126	CCDC51/KCNA1/KCNA10/KCNA3/KCNA4/KCNA5/KCNA7/KCNE1/KCNE3/KCNE4/KCNF1/KCNJ11/KCNJ12/KCNJ13/KCNJ15/KCNJ16/KCNJ2/KCNJ4/KCNS2/KCNS3	20
MF	GO:0022843	voltage-gated cation channel activity	22/1053	144/18410	2.31492e-05	0.000534285	0.00049515	CDK5/CNR1/HTR1B/KCNA1/KCNA10/KCNA3/KCNA4/KCNA5/KCNA7/KCNE1/KCNE3/KCNE4/KCNF1/KCNJ11/KCNJ12/KCNJ13/KCNJ15/KCNJ16/KCNJ2/KCNJ4/KCNS2/KCNS3	22
MF	GO:0140375	immune receptor activity	22/1053	148/18410	3.56964e-05	0.000792185	0.00073416	C3AR1/CCR1/CCR2/CCR3/CCR4/CCR5/CCR6/CCR8/CCRL2/CMKLR1/CXCR1/CXCR2/CXCR4/CXCR6/FPR1/FPR2/FPR3/GPR17/GPR75/LILRA6/LILRB1/XCR1	22
MF	GO:0001227	DNA-binding transcription repressor activity, RNA polymerase II-specific	37/1053	321/18410	3.98861e-05	0.000852381	0.000789947	ASCL1/BCL6B/FEZF1/FEZF2/FOXD3/FOXQ1/FOXS1/HELT/HESX1/HOXD9/IRX1/NEUROG3/NFIL3/NKX6-2/PEG3/SALL1/SCRT1/TCF21/THAP11/ZBED2/ZBTB12/ZBTB17/ZBTB26/ZBTB39/ZBTB4/ZBTB45/ZBTB6/ZNF239/ZNF391/ZNF436/ZNF439/ZNF491/ZNF512B/ZNF596/ZNF668/ZNF688/ZNF750	37
MF	GO:0001217	DNA-binding transcription repressor activity	37/1053	325/18410	5.20058e-05	0.00107169	0.000993194	ASCL1/BCL6B/FEZF1/FEZF2/FOXD3/FOXQ1/FOXS1/HELT/HESX1/HOXD9/IRX1/NEUROG3/NFIL3/NKX6-2/PEG3/SALL1/SCRT1/TCF21/THAP11/ZBED2/ZBTB12/ZBTB17/ZBTB26/ZBTB39/ZBTB4/ZBTB45/ZBTB6/ZNF239/ZNF391/ZNF436/ZNF439/ZNF491/ZNF512B/ZNF596/ZNF668/ZNF688/ZNF750	37
MF	GO:0015267	channel activity	49/1053	489/18410	9.73293e-05	0.00193652	0.00179467	AQP4/AQP6/ASIC3/CALHM2/CCDC51/CDK5/CHRNE/CHRNG/CNR1/GABRD/GJA1/GJA10/GJA4/GJA5/GJA8/GJA9/GJB2/GJB3/GJB4/GJB5/GJB6/GJB7/GJC1/GJD2/HTR1B/KCNA1/KCNA10/KCNA3/KCNA4/KCNA5/KCNA7/KCNE1/KCNE3/KCNE4/KCNF1/KCNJ11/KCNJ12/KCNJ13/KCNJ15/KCNJ16/KCNJ2/KCNJ4/KCNS2/KCNS3/LRRC8D/P2RX2/PKDREJ/PRF1/SCNN1D	49
MF	GO:0022803	passive transmembrane transporter activity	49/1053	490/18410	0.000102324	0.00196804	0.00182389	AQP4/AQP6/ASIC3/CALHM2/CCDC51/CDK5/CHRNE/CHRNG/CNR1/GABRD/GJA1/GJA10/GJA4/GJA5/GJA8/GJA9/GJB2/GJB3/GJB4/GJB5/GJB6/GJB7/GJC1/GJD2/HTR1B/KCNA1/KCNA10/KCNA3/KCNA4/KCNA5/KCNA7/KCNE1/KCNE3/KCNE4/KCNF1/KCNJ11/KCNJ12/KCNJ13/KCNJ15/KCNJ16/KCNJ2/KCNJ4/KCNS2/KCNS3/LRRC8D/P2RX2/PKDREJ/PRF1/SCNN1D	49
MF	GO:0004896	cytokine receptor activity	16/1053	97/18410	0.00011655	0.00216934	0.00201045	CCR1/CCR2/CCR3/CCR4/CCR5/CCR6/CCR8/CCRL2/CMKLR1/CXCR1/CXCR2/CXCR4/CXCR6/GPR17/GPR75/XCR1	16
MF	GO:0035250	UDP-galactosyltransferase activity	8/1053	29/18410	0.000162755	0.00293437	0.00271944	A4GALT/B3GALT1/B3GALT4/B3GALT5/B3GALT6/B3GNT2/B3GNT7/B3GNT8	8
MF	GO:0016758	hexosyltransferase activity	25/1053	198/18410	0.000167823	0.00293437	0.00271944	A4GALT/B3GALT1/B3GALT4/B3GALT5/B3GALT6/B3GNT2/B3GNT7/B3GNT8/B3GNT9/CHPF/FUT1/FUT2/FUT3/FUT5/FUT6/FUT9/GALNT4/GCNT1/GCNT3/GCNT4/GDPGP1/HYAL1/MGAT1/MGAT3/PIGQ	25
MF	GO:0008378	galactosyltransferase activity	8/1053	32/18410	0.000342262	0.00580838	0.00538294	A4GALT/B3GALT1/B3GALT4/B3GALT5/B3GALT6/B3GNT2/B3GNT7/B3GNT8	8
MF	GO:0015079	potassium ion transmembrane transporter activity	20/1053	154/18410	0.000503778	0.00830513	0.00769681	CCDC51/KCNA1/KCNA10/KCNA3/KCNA4/KCNA5/KCNA7/KCNE1/KCNE3/KCNE4/KCNF1/KCNJ11/KCNJ12/KCNJ13/KCNJ15/KCNJ16/KCNJ2/KCNJ4/KCNS2/KCNS3	20
MF	GO:0008146	sulfotransferase activity	10/1053	52/18410	0.000630359	0.00989307	0.00916844	CHST1/CHST14/CHST2/CHST3/CHST4/CHST5/CHST6/DSEL/HS3ST1/HS3ST5	10
MF	GO:0005242	inward rectifier potassium channel activity	7/1053	27/18410	0.000634391	0.00989307	0.00916844	KCNJ11/KCNJ12/KCNJ13/KCNJ15/KCNJ16/KCNJ2/KCNJ4	7
MF	GO:0003953	NAD+ nucleosidase activity	7/1053	28/18410	0.00080451	0.0122158	0.0113211	TICAM1/TICAM2/TLR1/TLR10/TLR2/TLR6/TLR9	7
MF	GO:0008375	acetylglucosaminyltransferase activity	9/1053	45/18410	0.000867921	0.0128408	0.0119002	B3GNT2/B3GNT7/B3GNT8/GCNT1/GCNT3/GCNT4/MGAT1/MGAT3/PIGQ	9
MF	GO:0019825	oxygen binding	8/1053	39/18410	0.00140292	0.0202372	0.0187549	CYP1A1/CYP26A1/CYP8B1/HBA1/HBA2/HBG2/HBM/HBQ1	8
MF	GO:0008194	UDP-glycosyltransferase activity	18/1053	144/18410	0.00146664	0.0206341	0.0191227	A4GALT/B3GALT1/B3GALT4/B3GALT5/B3GALT6/B3GNT2/B3GNT7/B3GNT8/B3GNT9/CHPF/GALNT4/GCNT1/GCNT3/GCNT4/HYAL1/MGAT1/MGAT3/PIGQ	18
MF	GO:0140103	catalytic activity, acting on a glycoprotein	6/1053	23/18410	0.00150196	0.0206341	0.0191227	B3GALT6/GCNT1/GCNT3/GCNT4/MGAT1/MGAT3	6
MF	GO:0042277	peptide binding	32/1053	322/18410	0.00170471	0.0228748	0.0211993	ADRB2/ANG/AVPR1A/BDKRB1/C1QA/CD14/CD209/CMKLR1/FPR2/FZD5/HLA-B/MC3R/MC4R/MCHR1/NMUR1/NPAP1/NPBWR2/NPY1R/NPY2R/NPY5R/OMP/OPRL1/PPIAL4A/PPIAL4G/PRLHR/SSTR1/SSTR2/SSTR3/SSTR5/TLR1/TLR2/TLR6	32
MF	GO:0016782	transferase activity, transferring sulphur-containing groups	11/1053	69/18410	0.00175076	0.0229589	0.0212772	CHST1/CHST14/CHST2/CHST3/CHST4/CHST5/CHST6/DSEL/HS3ST1/HS3ST5/OXCT2	11
MF	GO:0005244	voltage-gated ion channel activity	22/1053	201/18410	0.00266249	0.0333969	0.0309507	CDK5/CNR1/HTR1B/KCNA1/KCNA10/KCNA3/KCNA4/KCNA5/KCNA7/KCNE1/KCNE3/KCNE4/KCNF1/KCNJ11/KCNJ12/KCNJ13/KCNJ15/KCNJ16/KCNJ2/KCNJ4/KCNS2/KCNS3	22
MF	GO:0022832	voltage-gated channel activity	22/1053	201/18410	0.00266249	0.0333969	0.0309507	CDK5/CNR1/HTR1B/KCNA1/KCNA10/KCNA3/KCNA4/KCNA5/KCNA7/KCNE1/KCNE3/KCNE4/KCNF1/KCNJ11/KCNJ12/KCNJ13/KCNJ15/KCNJ16/KCNJ2/KCNJ4/KCNS2/KCNS3	22

## Sheet: CRISPR_essential_nonessential
CRISPR essential gene names			CRISPR nonessential gene names					Protected genes within CRISPR essential	Protected genes within CRISPR non-essential	Unrotected genes within CRISPR essential	Protected genes within CRISPR essential
AAMP			ABCG8					ALYREF	C20orf173	ACTB	ACTL7B
AARS1			ACCSL					ANAPC11	CLEC2A	ANKRD65	ACTL9
AARS2			ACTL7A					ANAPC13	KRTAP1-1	ATF4	ADAM20
AATF			ACTL7B					ATP6V0C	NANOGNB	AURKAIP1	ALPI
ABCB7			ACTL9					ATP6V1F	NOTO	CELSR2	APOA4
ABCE1			ADAD1					ATP6V1G1	PDE6H	CPSF1	APOF
ABCF1			ADAM18					BANF1	SPRR4	DDN	ATOH1
ABHD17A			ADAM2					BRI3	TEDDM1	DEXI	C10orf120
ABT1			ADAM20					BRIX1	ZG16	EEF1A1	CABS1
ACIN1			ADAM30					BUD31		FBXL6	COX7B2
ACLY			ADGRG7					C17orf58		FOXD4	DCAF4L2
ACO2			ADH7					C1D		GEMIN4	DDI1
ACTB			AFM					CCDC43		GEMIN7	DEFB126
ACTG1			AICDA					CDC42SE1		GPR61	FAM71C
ACTL6A			AIPL1					CHMP3		HIGD2A	FEZF1
ACTR10			ALPG					CHMP4B		HNRNPA1L2	FEZF2
ACTR1A			ALPI					COX17		HSPA8	FNDC9
ACTR2			ALX3					COX20		HYPK	FOXB1
ACTR6			ANKRD30A					COX6A1		IMP3	FOXB2
ACTR8			ANTXRL					COX6C		INHBE	FOXE3
ADAT3			APOA4					CPSF4		KRTAP17-1	FUT5
ADSL			APOBEC1					CRCT1		KTI12	FUT9
ADSS2			APOF					CYCS		LSM10	GJA10
AFG3L2			AQP8					DDX5		MARS2	GJA8
AGAP6			ARGFX					DROSHA		MED11	GPR148
AHCTF1			ART1					EIF1		MED7	GPR151
AHCY			ASB17					EIF6		MIS12	GPR31
AK4			ASIC5					ENSA		MRPL28	GPR45
AK6			ASZ1					EXOSC6		MRPL53	GSX2
AKIRIN2			ATOH1					FAM32A		MST1	HOXB1
AKR1B15			ATP4B					GFER		NUP62	HOXD12
AKTIP			ATP6V1G3					HAPLN2		PARS2	HTR1A
ALDOA			B3GNT6					HMGCS1		PCBP1	IFNA21
ALG1			BANF2					HRK		PELO	IFNA5
ALG11			BARHL1					LAMTOR2		POP7	IFNB1
ALG13			BIRC8					LAMTOR4		PREB	IRGC
ALG14			BMP10					LLPH		RBMXL1	KCNA10
ALG1L			BPIFA1					LSM12		RMI1	KHDC3L
ALG2			BPIFA3					MCCD1		RPL15	KRT36
ALYREF			BPIFB3					MED10		RPL8	KRT37
AMD1			BPIFB6					MED21		SF3B5	KRT85
ANAPC1			BPIFC					MED30		SNAPC2	KRTAP11-1
ANAPC10			BRDT					MRPL12		SRSF2	KRTAP13-2
ANAPC11			BSND					MRPL36		TAF7	KRTAP17-1
ANAPC13			C10orf113					MRPL41		TDGF1	KRTAP19-3
ANAPC15			C10orf120					MRPL9		THAP11	KRTAP3-2
ANAPC2			C10orf53					MRPS14		TONSL	KRTAP5-2
ANAPC4			C11orf40					MRPS21		TRAPPC1	LBX1
ANAPC5			C12orf40					MRPS23		TRAPPC5	MAS1L
ANKLE2			C16orf78					MRPS34		TUBA1B	MBD3L1
ANKRD65			C17orf78					MRPS35		UBE2M	MC2R
ANLN			C1orf146					MRPS7		UQCRQ	MC3R
AP2M1			C20orf173					NDUFC2		UROD	MC5R
AP2S1			C2orf83					NME2		VPS28	MRGPRX1
AQP7			C8A					NSMCE2		ZBTB17	MRGPRX4
AQR			C8B					PDCD5			MSGN1
ARCN1			C8orf86					PDRG1			MYF5
ARF4			CABP2					PFDN2			NANOS2
ARFRP1			CABP5					PIGC			NEUROD4
ARGFX			CABS1					PMF1			OLIG3
ARGLU1			CACNG2					PPP1R2			OR10A2
ARHGAP27			CACNG3					PPY			OR10H1
ARIH1			CACNG5					PRR13			OR10S1
ARL2			CATSPER4					PSMA7			OR13D1
ARMC7			CBLIF					PSMG3			OR14A16
ARPC2			CCDC172					PTMS			OR1E2
ARPC3			CCDC83					RAB1A			OR1G1
ARPC4			CCKAR					RAD1			OR1L6
ARPP19			CCL1					RMI2			OR1N2
ARTN			CCT8L2					ROMO1			OR2C1
ASCC3			CD200R1L					RPL18			OR2D3
ATF4			CDCP2					RPL27			OR2L3
ATL2			CDX2					RPL30			OR2T10
ATP1A1			CEACAM7					RPL36AL			OR2T33
ATP23			CELA2A					RPL37			OR3A1
ATP2A2			CELA3A					RPL38			OR3A2
ATP5F1A			CELA3B					RPS25			OR3A3
ATP5F1B			CER1					SCNM1			OR51B6
ATP5F1C			CETN1					SDHC			OR52B2
ATP5F1D			CFHR2					SKP2			OR52E8
ATP5MC1			CFHR5					SNAPIN			OR52K2
ATP5MC2			CHAT					SNF8			OR52L1
ATP5MF			CHRNA6					SPRR2G			OR52W1
ATP5MG			CHRNB3					SRP9			OR5C1
ATP5MGL			CLCA1					SUMO2			OR5P2
ATP5PB			CLDN17					SUPT4H1			OR5P3
ATP5PD			CLEC2A					TEN1			OR6A2
ATP5PF			CLEC3A					TIMM10			OR6S1
ATP5PO			CLEC6A					TIMM13			OR8A1
ATP6AP1			CLRN1					TOMM20			PBOV1
ATP6AP2			CNBD1					VPS25			PGK2
ATP6V0B			CNGB3					WDR70			POTEG
ATP6V0C			CNPY1					YEATS4			POU4F3
ATP6V0D1			CNTNAP5					YPEL5			PPP3R2
ATP6V1A			COL20A1					ZNF131			PRLH
ATP6V1B2			COX7B2								PRLHR
ATP6V1C1			CRNN								RBMXL2
ATP6V1D			CRX								RBP3
ATP6V1E1			CRYGB								REG3A
ATP6V1F			CSH1								RFPL3
ATP6V1G1			CSHL1								RFPL4B
ATP6V1H			CSN2								RNASE10
ATR			CSN3								RNASE13
ATRIP			CST11								RNF113B
ATXN10			CST4								RP1
AURKA			CST5								RP1L1
AURKAIP1			CST8								RXFP3
AURKB			CST9								SLC18A3
BAK1			CST9L								SLC25A2
BANF1			CSTL1								SLITRK1
BANP			CTCFL								SOX14
BARD1			CTRB1								SPEM1
BCAS2			CYLC2								TAAR1
BCCIP			CYP11B1								TAS2R1
BCL2L1			CYP11B2								TAS2R13
BCLAF1			CYP26C1								TAS2R42
BDP1			CYP2A13								TAS2R46
BET1			CYP2C19								TAS2R50
BIRC5			CYP4A22								TAS2R8
BMS1			CYP7A1								TKTL2
BNIP1			DAZL								TRIML1
BOP1			DCAF4L2								TSHB
BORA			DCANP1								TSPYL6
BPTF			DDI1								UBQLN3
BRD4			DDX4								USP17L2
BRD8			DEFA5								VN1R2
BRF1			DEFA6								VPREB1
BRF2			DEFB103B								VRTN
BRI3			DEFB104A								ZNF648
BRIX1			DEFB106A
BTF3			DEFB118
BTF3L4			DEFB123
BUB1			DEFB126
BUB1B			DEFB127
BUB3			DEFB129
BUD13			DIRC1
BUD23			DMP1
BUD31			DMRT1
BYSL			DMRTB1
C17orf49			DMRTC2
C17orf58			DPRX
C18orf21			DRD3
C19orf53			DRGX
C1D			DSCR4
C1QBP			DSG4
C1orf109			DSPP
C1orf122			DTX2
C1orf131			DUXA
C9orf78			EFCAB3
CA5A			EGR4
CACNB3			ELOA2
CACTIN			ENTHD1
CACYBP			EVX1
CAP1			F13B
CAPZB			FABP2
CARS1			FAM71A
CBX1			FAM71B
CCAR1			FAM71C
CCDC107			FCRL4
CCDC115			FEZF1
CCDC12			FEZF2
CCDC137			FFAR1
CCDC144A			FGF3
CCDC174			FGF4
CCDC43			FGF6
CCDC59			FIGLA
CCDC86			FLG2
CCNA2			FNDC7
CCNB1			FNDC9
CCNH			FOXB1
CCNK			FOXB2
CCT2			FOXD4L4
CCT3			FOXE3
CCT4			FOXN1
CCT5			FOXR1
CCT6A			FRG2
CCT7			FSCB
CCT8			FUT5
CD3D			FUT9
CDAN1			G6PC1
CDC123			GABRA1
CDC16			GABRA6
CDC20			GALNTL5
CDC23			GALR1
CDC26			GALR3
CDC27			GBP7
CDC37			GCG
CDC40			GCM2
CDC42			GDF2
CDC42SE1			GFRA4
CDC45			GFRAL
CDC5L			GH2
CDC6			GHRH
CDC7			GHSR
CDC73			GJA10
CDCA5			GJA8
CDCA8			GK2
CDIPT			GKN2
CDK1			GLRA1
CDK12			GLT6D1
CDK2			GML
CDK4			GOT1L1
CDK7			GPR139
CDK9			GPR148
CDT1			GPR151
CEBPZ			GPR152
CELSR2			GPR26
CENATAC			GPR31
CENPA			GPR32
CENPC			GPR45
CENPE			GPR52
CENPH			GPR78
CENPI			GPRC6A
CENPK			GPX5
CENPL			GPX6
CENPM			GRM4
CENPN			GRM5
CENPT			GRM6
CENPW			GSC2
CEP131			GSTA5
CEP192			GSX1
CFAP20			GSX2
CFAP298			GUCA2A
CFDP1			H1-8
CFL1			H2AC1
CHAF1A			H2BC1
CHAF1B			H4C7
CHCHD1			HAO1
CHCHD2			HCRTR2
CHCHD3			HDGFL1
CHCHD4			HMX1
CHD4			HOXB1
CHEK1			HOXD12
CHERP			HRG
CHMP2A			HRH3
CHMP3			HTN3
CHMP4B			HTR1A
CHMP5			HTR3C
CHMP6			HTR3D
CHMP7			HTR3E
CHORDC1			HTR5A
CHTF8			HTR6
CIAO1			IAPP
CIAO2A			IFIT1B
CIAO2B			IFNA10
CIAO3			IFNA14
CIAPIN1			IFNA16
CINP			IFNA17
CITED4			IFNA2
CKAP5			IFNA21
CKS2			IFNA4
CLASRP			IFNA5
CLK2			IFNA6
CLNS1A			IFNA7
CLP1			IFNA8
CLSPN			IFNB1
CLTC			IFNK
CMC1			IFNW1
CMPK1			IL12B
CMTR1			IL13
CNIH4			IL17A
CNN2			IL17F
CNOT1			IL1F10
CNOT3			IL21
CNOT7			IL22
COA5			IL25
COASY			IL26
COG1			IL3
COG2			IL31
COG3			IL36A
COG8			IL36B
COPA			IL36RN
COPB1			IL9
COPB2			INS
COPE			INSL5
COPG1			INSL6
COPS2			INSM2
COPS3			INSRR
COPS4			IQCF1
COPS5			IRGC
COPS6			ISX
COPS8			IZUMO2
COPZ1			KASH5
COQ2			KCNA10
COQ4			KCNB2
COX17			KCNG4
COX20			KCNK10
COX5A			KCNK16
COX5B			KCNK18
COX6A1			KCNV1
COX6B1			KHDC3L
COX6C			KIF2B
COX7B			KIR2DL1
COX7C			KIR3DL3
CPAMD8			KLK12
CPSF1			KLK9
CPSF2			KRT2
CPSF3			KRT25
CPSF4			KRT26
CPSF6			KRT28
CRCP			KRT33A
CRCT1			KRT35
CRKL			KRT36
CRLS1			KRT37
CRNKL1			KRT38
CS			KRT40
CSE1L			KRT71
CSNK1A1			KRT73
CSNK2B			KRT74
CSTF1			KRT75
CSTF3			KRT76
CTCF			KRT77
CTDNEP1			KRT78
CTDP1			KRT82
CTNNBL1			KRT84
CTPS1			KRT85
CTR9			KRT86
CTU1			KRT9
CTU2			KRTAP1-1
CUL1			KRTAP10-1
CUL2			KRTAP10-10
CUL3			KRTAP10-11
CWC22			KRTAP10-12
CWC25			KRTAP10-2
CWF19L2			KRTAP10-4
CYCS			KRTAP10-5
CYFIP1			KRTAP10-6
DAD1			KRTAP10-8
DAP3			KRTAP10-9
DARS1			KRTAP11-1
DBF4			KRTAP13-1
DBR1			KRTAP13-2
DCLRE1B			KRTAP13-3
DCTN2			KRTAP13-4
DCTN3			KRTAP15-1
DCTN4			KRTAP17-1
DCTN5			KRTAP19-3
DCTN6			KRTAP23-1
DDA1			KRTAP26-1
DDB1			KRTAP3-2
DDN			KRTAP4-11
DDOST			KRTAP4-12
DDX10			KRTAP4-2
DDX11			KRTAP4-4
DDX18			KRTAP4-7
DDX20			KRTAP5-2
DDX21			KRTAP9-2
DDX23			KRTAP9-3
DDX24			KRTAP9-4
DDX27			LALBA
DDX39B			LBX1
DDX41			LCN9
DDX42			LCT
DDX46			LGALS13
DDX47			LGALS14
DDX49			LHFPL5
DDX5			LHX3
DDX51			LHX5
DDX52			LIM2
DDX54			LIN28A
DDX55			LINC01599
DDX56			LIPM
DDX59			LORICRIN
DDX6			LRIT1
DEFB129			LRIT2
DENR			LRRC10
DEXI			LYZL1
DGCR8			LYZL6
DHDDS			MAS1
DHFR2			MAS1L
DHPS			MBD3L1
DHX15			MBD3L2
DHX16			MBL2
DHX33			MC2R
DHX36			MC3R
DHX37			MC5R
DHX38			MEP1A
DHX8			MEP1B
DHX9			MEPE
DICER1			MFRP
DIMT1			MMD2
DIS3			MMP20
DKC1			MMP21
DMAP1			MMP26
DNAAF10			MMP27
DNAJA1			MOGAT3
DNAJA3			MORC1
DNAJB6			MRGPRD
DNAJC17			MRGPRX1
DNAJC8			MRGPRX2
DNAJC9			MRGPRX4
DNM1L			MS4A10
DNM2			MS4A13
DNMT1			MS4A5
DNTTIP2			MSGN1
DOHH			MT1B
DONSON			MTNR1B
DPAGT1			MUC17
DPH3			MUC7
DPPA3			MUCL3
DPY19L2			MYBPC3
DPY30			MYF5
DR1			NANOGNB
DRAP1			NANOS2
DROSHA			NCR2
DSN1			NDST4
DTL			NEUROD2
DTYMK			NEUROD4
DUT			NEUROD6
DUXA			NEUROG1
DYNC1H1			NKX2-1
DYNC1I2			NKX2-2
DYNLL1			NLRP4
DYNLRB1			NLRP5
E2F6			NLRP8
EAPP			NLRP9
EBNA1BP2			NMS
ECD			NOTO
ECT2			NOX3
EEF1A1			NPFFR1
EEF1B2			NPHS2
EEF1G			NPSR1
EEF2			NPVF
EEF2KMT			NR2E1
EFL1			OC90
EFTUD2			OLIG2
EHMT2			OLIG3
EIF1			OPALIN
EIF1AD			OPN5
EIF1AX			OR10A2
EIF2B1			OR10A4
EIF2B2			OR10A5
EIF2B3			OR10H1
EIF2B4			OR10H2
EIF2B5			OR10H3
EIF2S1			OR10J1
EIF2S2			OR10R2
EIF2S3			OR10S1
EIF3A			OR10X1
EIF3B			OR10Z1
EIF3D			OR11A1
EIF3E			OR12D2
EIF3F			OR12D3
EIF3G			OR13C3
EIF3H			OR13D1
EIF3I			OR14A16
EIF3J			OR1A1
EIF3M			OR1A2
EIF4A1			OR1B1
EIF4A3			OR1D2
EIF4B			OR1E1
EIF4E			OR1E2
EIF4G1			OR1G1
EIF4G2			OR1L6
EIF5			OR1N2
EIF5A			OR1S1
EIF5AL1			OR1S2
EIF6			OR2AK2
ELAC2			OR2AT4
ELL			OR2C1
ELOB			OR2C3
ELOC			OR2D2
ELP1			OR2D3
ELP2			OR2F1
ELP3			OR2G2
ELP4			OR2G3
ELP5			OR2H1
ELP6			OR2J2
EMC1			OR2L3
EMC3			OR2T1
EMC7			OR2T10
ENSA			OR2T12
ENY2			OR2T2
EP400			OR2T27
EPOP			OR2T33
EPRS1			OR2T4
ERCC2			OR2T5
ERCC3			OR2W1
ERH			OR3A1
ESF1			OR3A2
ESPL1			OR3A3
ESRRA			OR4C11
ESS2			OR4C3
ETF1			OR4D1
EWSR1			OR4D10
EXOC1			OR4D11
EXOC3			OR4D9
EXOC4			OR4K17
EXOC5			OR51B6
EXOC8			OR51D1
EXOSC1			OR51F2
EXOSC10			OR51T1
EXOSC2			OR51V1
EXOSC3			OR52A1
EXOSC4			OR52A5
EXOSC5			OR52B2
EXOSC6			OR52B6
EXOSC7			OR52E8
EXOSC8			OR52I2
EXOSC9			OR52K2
FAAP20			OR52L1
FABP5			OR52M1
FAM104B			OR52R1
FAM133B			OR52W1
FAM136A			OR56A1
FAM168A			OR56A4
FAM32A			OR56B1
FAM91A1			OR5AU1
FAR2			OR5C1
FARSA			OR5I1
FARSB			OR5M1
FAU			OR5M10
FBL			OR5P2
FBLIM1			OR5P3
FBXL6			OR5T1
FBXO5			OR5T2
FCF1			OR5T3
FDPS			OR5V1
FDX2			OR5W2
FDXR			OR6A2
FECH			OR6K6
FEN1			OR6S1
FIP1L1			OR6V1
FKBP1A			OR7A17
FNBP4			OR7C2
FNTA			OR7D4
FNTB			OR7G2
FOXD4			OR8A1
FPGS			OR8B8
FTSJ3			OR8G5
FXN			OR8U1
GABPA			OR8U3
GABPB1			OR9Q2
GAK			OTOP1
GALP			OTOP3
GAPDH			OTOR
GAR1			OTP
GARS1			OTX2
GBF1			PANX3
GCSH			PAX1
GEMIN4			PAX4
GEMIN5			PBOV1
GEMIN6			PCARE
GEMIN7			PDCL2
GEMIN8			PDE6H
GET3			PDILT
GFER			PDX1
GFM1			PDYN
GFPT1			PGK2
GGPS1			PGLYRP2
GGT1			PGLYRP3
GGTLC2			PIWIL1
GINS1			PIWIL3
GINS2			PLA2G2E
GINS3			PLA2G2F
GINS4			PLA2G4E
GJA3			PNLIP
GLE1			PNLIPRP1
GLRX5			PNPLA5
GMPPB			POM121L12
GMPS			POTED
GNB1L			POTEG
GNL2			POTEH
GNL3			POU4F2
GNL3L			POU4F3
GON4L			POU5F2
GOSR2			PPP3R2
GOT2			PRAMEF1
GPKOW			PRAMEF2
GPN1			PRAMEF4
GPN2			PRAMEF7
GPN3			PRB1
GPR61			PRB4
GPS1			PRDM13
GRPEL1			PRDM14
GRWD1			PRDM7
GSDMA			PRDM9
GSPT1			PRG3
GTF2A1			PRLH
GTF2A2			PRLHR
GTF2B			PROP1
GTF2E1			PRSS33
GTF2E2			PRSS37
GTF2F1			PRSS38
GTF2F2			PRSS55
GTF2H1			PRSS58
GTF2H3			PSKH2
GTF2H4			PTF1A
GTF3A			RAX
GTF3C1			RAX2
GTF3C2			RBM46
GTF3C3			RBMXL2
GTF3C4			RBP3
GTF3C5			RBPJL
GTPBP4			RD3
GUK1			RDH8
H1-2			REG3A
H2AC11			RESP18
H2AC12			RETNLB
H2AC15			RFPL3
H2AC16			RFPL4B
H2AC17			RFX6
H2AC20			RHO
H2AC21			RNASE10
H2AC4			RNASE11
H2AC6			RNASE12
H2AC7			RNASE13
H2AC8			RNASE8
H2AJ			RNASE9
H2AW			RND2
H2AX			RNF113B
H2AZ1			RNF17
H2BC11			RP1
H2BC12			RP1L1
H2BC14			RPE65
H2BC15			RPTN
H2BC4			RTP1
H2BC5			RTP2
H2BC6			RXFP2
H2BC8			RXFP3
H2BC9			S100A7A
H3C11			SAMD7
H3C13			SCGB1D1
H3C8			SCN10A
H4C1			SCRT2
HAMP			SDR9C7
HAPLN2			SEC14L3
HARS1			SEMG2
HAUS1			SEPTIN14
HAUS2			SERPINA12
HAUS3			SERPINA9
HAUS4			SERPINB12
HAUS5			SHCBP1L
HAUS6			SI
HAUS7			SIGLECL1
HAUS8			SIX6
HCFC1			SLC10A2
HCFC1R1			SLC13A1
HDAC3			SLC17A2
HEATR1			SLC17A6
HERC2			SLC18A3
HGS			SLC22A12
HIGD2A			SLC22A13
HINFP			SLC22A25
HIRA			SLC22A6
HJURP			SLC22A8
HMGA1			SLC22A9
HMGB1			SLC25A2
HMGB3			SLC25A31
HMGCR			SLC2A2
HMGCS1			SLC2A7
HMGN2			SLC32A1
HNRNPA1L2			SLC34A1
HNRNPC			SLC36A3
HNRNPH1			SLC39A12
HNRNPK			SLC6A18
HNRNPL			SLC6A5
HNRNPM			SLC6A7
HNRNPR			SLC7A13
HNRNPU			SLCO1B1
HRK			SLCO6A1
HS6ST1			SLITRK1
HSCB			SOHLH1
HSP90B1			SOX1
HSPA5			SOX14
HSPA8			SP8
HSPA9			SPACA1
HSPD1			SPACA7
HSPE1			SPATA16
HTATSF1			SPATA21
HUWE1			SPEM1
HYOU1			SPHAR
HYPK			SPINK14
IARS1			SPO11
IARS2			SPPL2C
ICE1			SPRR4
ICE2			SSTR4
IFITM2			STATH
IFITM3			STPG4
IGBP1			SULT6B1
IGSF3			SUN5
IK			TAAR1
ILF2			TAAR2
ILF3			TAAR5
IMP3			TAAR6
IMP4			TAAR8
INCENP			TAS1R2
INHBE			TAS2R1
INO80			TAS2R13
INO80B			TAS2R16
INTS1			TAS2R39
INTS11			TAS2R40
INTS14			TAS2R41
INTS2			TAS2R42
INTS3			TAS2R43
INTS4			TAS2R46
INTS5			TAS2R50
INTS7			TAS2R60
INTS8			TAS2R7
INTS9			TAS2R8
IPO11			TAS2R9
IPO13			TBC1D21
IPO7			TBC1D29P
IPO9			TBPL2
ISCA2			TBR1
ISCU			TBX10
ISG20L2			TBXT
ISY1			TCHHL1
JAZF1			TCP10L2
KANSL1			TEDDM1
KANSL2			TEX101
KANSL3			TEX44
KARS1			TEX45
KAT5			TEX55
KAT8			TFAP2D
KCMF1			TGM6
KDM2A			TKTL2
KDM8			TLX1
KIAA1143			TMEM132D
KIF11			TMEM132E-DT
KIF14			TMEM174
KIF18A			TMEM207
KIF20A			TMEM225
KIF23			TMIGD1
KIF4A			TMPRSS11A
KIFBP			TMPRSS11B
KIN			TMPRSS11F
KLC2			TMPRSS12
KLHL11			TMPRSS15
KMT5A			TNR
KNL1			TPD52L3
KPNB1			TPH2
KRAS			TPRX1
KRBOX5			TPTE
KRR1			TREML4
KRT8			TRHR
KRTAP17-1			TRIM40
KRTAP21-1			TRIM42
KRTAP4-11			TRIM43
KRTAP4-2			TRIM48
KRTAP5-11			TRIM60
KTI12			TRIM67
LAMTOR2			TRIML1
LAMTOR3			TRPC7
LAMTOR4			TRPM1
LARS1			TRPV5
LAS1L			TSBP1
LCE2A			TSGA13
LCE3A			TSHB
LCE5A			TSPAN16
LENG8			TSPO2
LETM1			TSPYL6
LIMS1			TSSK1B
LIN52			TSSK2
LIN9			TXNDC8
LLPH			TYR
LONP1			UBQLN3
LRPPRC			UMOD
LRR1			UROC1
LRRC37A3			USP17L2
LRRC37B			USP29
LSG1			UTS2R
LSM10			VAX1
LSM11			VN1R2
LSM12			VN1R4
LSM14A			VPREB1
LSM2			VRTN
LSM3			VSX2
LSM4			WFDC10A
LSM5			WFDC11
LSM6			WFDC9
LSM7			XKR7
LSM8			ZG16
LST1			ZIM3
LTO1			ZNF648
LTV1			ZNF679
LUC7L3			ZNF804B
LYRM4			ZNRF4
MAD2L1			ZP2
MAD2L1BP			ZP4
MAD2L2			ZSWIM2
MAGOH
MAK16
MARS1
MARS2
MASTL
MAT2A
MAX
MCCD1
MCL1
MCM10
MCM2
MCM3
MCM3AP
MCM4
MCM5
MCM6
MCM7
MCMBP
MCRS1
MDM2
MDN1
MEAF6
MED1
MED10
MED11
MED14
MED17
MED18
MED20
MED21
MED22
MED26
MED27
MED28
MED29
MED30
MED31
MED4
MED6
MED7
MED8
MED9
MEPCE
METAP1
METAP2
METTL1
METTL14
METTL15
METTL16
METTL17
METTL3
MFAP1
MFN2
MIS12
MIS18A
MIS18BP1
MIX23
MKRN1
MLST8
MLX
MMS19
MMS22L
MNAT1
MOB4
MOCS3
MPHOSPH10
MRGBP
MRPL10
MRPL12
MRPL14
MRPL16
MRPL19
MRPL21
MRPL24
MRPL27
MRPL28
MRPL3
MRPL32
MRPL33
MRPL34
MRPL35
MRPL36
MRPL37
MRPL38
MRPL39
MRPL4
MRPL41
MRPL43
MRPL45
MRPL49
MRPL50
MRPL53
MRPL55
MRPL57
MRPL58
MRPL9
MRPS10
MRPS11
MRPS12
MRPS14
MRPS16
MRPS18A
MRPS18B
MRPS21
MRPS22
MRPS23
MRPS24
MRPS27
MRPS28
MRPS34
MRPS35
MRPS5
MRPS7
MRTO4
MST1
MSTO1
MT1B
MT1E
MTBP
MTG2
MTOR
MTPAP
MTREX
MTRF1L
MVD
MVK
MXRA7
MYBBP1A
MYC
MYO1H
MZT1
NAA10
NAA15
NAA20
NAA25
NAA35
NAA50
NACA
NAE1
NAIP
NAPA
NAPG
NARS1
NASP
NAT10
NBAS
NBPF3
NCAPD2
NCAPD3
NCAPG
NCAPG2
NCAPH
NCAPH2
NCBP1
NCBP2
NCL
NCOA4
NDC1
NDC80
NDOR1
NDUFA11
NDUFA2
NDUFA4
NDUFAB1
NDUFAF1
NDUFAF8
NDUFB10
NDUFB3
NDUFB4
NDUFB7
NDUFB9
NDUFC2
NDUFS5
NDUFS8
NEDD1
NEDD8
NELFA
NELFB
NELFCD
NELFE
NEPRO
NFE2L3
NFKBIE
NFS1
NFYB
NFYC
NGDN
NHP2
NIFK
NIP7
NKAP
NLE1
NMD3
NME2
NMT1
NOB1
NOC2L
NOC3L
NOC4L
NOL10
NOL11
NOL12
NOL6
NOL7
NOL8
NOL9
NOLC1
NOM1
NOP10
NOP14
NOP16
NOP2
NOP53
NOP56
NOP58
NOP9
NOPCHAP1
NPAT
NPEPPS
NPLOC4
NPM1
NRBP1
NRDE2
NRF1
NSA2
NSF
NSL1
NSMCE1
NSMCE2
NSMCE3
NSUN4
NUBP1
NUBP2
NUDC
NUDCD3
NUDT21
NUF2
NUFIP1
NUMA1
NUP107
NUP133
NUP153
NUP155
NUP160
NUP205
NUP214
NUP35
NUP43
NUP50
NUP54
NUP62
NUP85
NUP88
NUP93
NUP98
NUS1
NUTF2
NVL
NXF1
OGDH
OGT
OIP5
OPA1
ORC1
ORC3
ORC4
ORC5
ORC6
OSBP
OSGEP
OSTC
OTOP1
OXA1L
PA2G4
PABPC1
PABPN1
PAF1
PAFAH1B1
PAICS
PAK1IP1
PAM16
PAQR6
PARL
PARS2
PAXBP1
PC
PCBP1
PCBP2
PCF11
PCID2
PCNA
PCNP
PDAP1
PDCD11
PDCD2
PDCD5
PDCD7
PDCL3
PDPK1
PDRG1
PEF1
PELO
PELP1
PES1
PFDN1
PFDN2
PFDN5
PFDN6
PFN1
PGAM1
PGAM4
PGD
PGGT1B
PGK1
PGS1
PHAX
PHB
PHB2
PHF5A
PI4KA
PIGC
PIGH
PIK3C3
PIK3R4
PIN4
PIP5K1A
PISD
PKM
PKMYT1
PLEKHM1
PLK1
PLK4
PLRG1
PMF1
PMPCA
PMPCB
PNISR
PNKP
PNN
PNO1
PNPT1
POGZ
POLA1
POLA2
POLD1
POLD2
POLD3
POLE
POLE2
POLR1A
POLR1B
POLR1C
POLR1D
POLR1E
POLR1F
POLR1G
POLR1H
POLR2B
POLR2C
POLR2D
POLR2E
POLR2F
POLR2G
POLR2H
POLR2I
POLR2L
POLR3A
POLR3B
POLR3C
POLR3E
POLR3F
POLR3H
POLR3K
POLRMT
POM121C
POMP
POP1
POP4
POP5
POP7
POTEI
PPA1
PPAN
PPARGC1B
PPAT
PPCS
PPIE
PPIL1
PPIL2
PPIL4
PPP1CA
PPP1CB
PPP1R10
PPP1R11
PPP1R12A
PPP1R14B
PPP1R15B
PPP1R2
PPP1R7
PPP1R8
PPP2CA
PPP2R1A
PPP2R3C
PPP4C
PPP4R2
PPRC1
PPWD1
PPY
PRAMEF18
PRC1
PRCC
PRDM10
PRDX2
PREB
PRELID1
PRELID3B
PRIM1
PRKRA
PRKRIP1
PRMT1
PRMT5
PRPF18
PRPF19
PRPF3
PRPF31
PRPF38A
PRPF38B
PRPF39
PRPF4
PRPF40A
PRPF4B
PRPF6
PRPF8
PRR13
PRRC2A
PSMA1
PSMA2
PSMA3
PSMA4
PSMA5
PSMA6
PSMA7
PSMB1
PSMB2
PSMB3
PSMB4
PSMB5
PSMB6
PSMB7
PSMC1
PSMC2
PSMC3
PSMC4
PSMC5
PSMC6
PSMD1
PSMD11
PSMD12
PSMD13
PSMD14
PSMD2
PSMD3
PSMD4
PSMD6
PSMD7
PSMD8
PSME1
PSMG2
PSMG3
PSMG4
PTCD3
PTMA
PTMS
PTPA
PTPMT1
PTPN11
PTPN23
PTTG1
PUF60
PWP1
PWP2
PYM1
PYROXD1
PYURF
QARS1
RAB1A
RAB1B
RABGGTA
RABGGTB
RAC1
RACGAP1
RACK1
RAD1
RAD17
RAD21
RAD51
RAD51C
RAD51D
RAD9A
RAE1
RAMAC
RAN
RANBP1
RANBP2
RANGAP1
RAP1B
RARS1
RBBP4
RBBP5
RBBP6
RBBP8
RBM14
RBM17
RBM19
RBM22
RBM25
RBM28
RBM39
RBM42
RBM48
RBM8A
RBMX
RBMX2
RBMXL1
RBX1
RCC1
RCC1L
RCL1
RELA
REV3L
RFC1
RFC2
RFC3
RFC4
RFC5
RFT1
RHEB
RHOQ
RILP
RINT1
RIOK1
RIOK2
RMI1
RMI2
RNF113A
RNF20
RNF4
RNF40
RNF8
RNGTT
RNMT
RNPC3
RNPS1
ROMO1
RPA1
RPA2
RPA3
RPAIN
RPAP1
RPAP2
RPAP3
RPE
RPF1
RPF2
RPL10
RPL10A
RPL11
RPL12
RPL13
RPL13A
RPL14
RPL15
RPL18
RPL18A
RPL19
RPL21
RPL22
RPL23
RPL23A
RPL24
RPL26
RPL26L1
RPL27
RPL27A
RPL28
RPL3
RPL30
RPL31
RPL32
RPL35
RPL35A
RPL36
RPL36A
RPL36AL
RPL37
RPL37A
RPL38
RPL4
RPL5
RPL6
RPL7
RPL8
RPLP0
RPLP1
RPLP2
RPN1
RPN2
RPP14
RPP21
RPP30
RPP38
RPP40
RPS10
RPS11
RPS12
RPS13
RPS15
RPS15A
RPS16
RPS18
RPS19
RPS19BP1
RPS2
RPS20
RPS21
RPS23
RPS24
RPS25
RPS27A
RPS29
RPS3
RPS4X
RPS5
RPS6
RPS7
RPS8
RPS9
RPSA
RPTOR
RRM1
RRM2
RRN3
RRP1
RRP12
RRP15
RRP36
RRP7A
RRP9
RRS1
RSL1D1
RSPH9
RSRC2
RTCB
RTEL1
RTF1
RTF2
RTRAF
RUVBL1
RUVBL2
SACM1L
SAE1
SAMM50
SAP130
SAP18
SAP30BP
SARNP
SARS1
SARS2
SART1
SART3
SASS6
SBDS
SBNO1
SCARF1
SCD
SCFD1
SCG5
SCNM1
SCYL1
SDAD1
SDE2
SDHAF2
SDHC
SDHD
SEC13
SEC16A
SEC61A1
SEC61B
SEC61G
SEC63
SEH1L
SEM1
SENP6
SERBP1
SETD1A
SF1
SF3A1
SF3A2
SF3A3
SF3B1
SF3B2
SF3B3
SF3B4
SF3B5
SF3B6
SFPQ
SFSWAP
SGO1
SHQ1
SIGLEC11
SIN3A
SINHCAF
SKA1
SKA2
SKA3
SKP1
SKP2
SLBP
SLC25A10
SLC25A3
SLC25A38
SLC25A5
SLC35B1
SLC39A10
SLC39A7
SLC7A5
SLC7A6OS
SLC9B1
SLU7
SMARCA5
SMARCB1
SMARCE1
SMC1A
SMC2
SMC3
SMC4
SMC5
SMC6
SMG1
SMG5
SMG6
SMG7
SMIM7
SMNDC1
SMR3B
SMS
SMU1
SNAP23
SNAPC1
SNAPC2
SNAPC3
SNAPC4
SNAPC5
SNAPIN
SNF8
SNIP1
SNRNP200
SNRNP25
SNRNP27
SNRNP35
SNRNP40
SNRNP48
SNRNP70
SNRPA1
SNRPB
SNRPB2
SNRPC
SNRPD1
SNRPD2
SNRPD3
SNRPF
SNU13
SNUPN
SNW1
SOD1
SOD2
SON
SOWAHC
SPAG5
SPATA5
SPATA5L1
SPC24
SPC25
SPCS2
SPCS3
SPDL1
SPDYE1
SPOUT1
SPRR2G
SPRTN
SPRYD4
SPTLC1
SRBD1
SRCAP
SRF
SRFBP1
SRP14
SRP19
SRP54
SRP68
SRP72
SRP9
SRPRA
SRPRB
SRRM1
SRRT
SRSF1
SRSF10
SRSF11
SRSF2
SRSF3
SRSF6
SRSF7
SS18L2
SSB
SSBP3
SSRP1
SSU72
SSX5
ST13
STARD7
STAT5A
STIL
STRAP
STX18
STX5
SUDS3
SUGP1
SUGT1
SUMO1
SUMO2
SUPT16H
SUPT4H1
SUPT5H
SUPT6H
SUPV3L1
SURF6
SVBP
SYF2
SYMPK
SYS1
SYVN1
TACC3
TADA2A
TAF1
TAF10
TAF12
TAF13
TAF1A
TAF1B
TAF1C
TAF1D
TAF2
TAF5
TAF6
TAF7
TAF8
TAMM41
TANGO6
TARDBP
TARS1
TARS2
TBCA
TBCB
TBCC
TBCD
TBCE
TBL3
TBP
TCERG1
TCOF1
TCP1
TDGF1
TEFM
TELO2
TEN1
TERF1
TEX10
TFAM
TFB2M
TFDP1
TFIP11
TFRC
TGS1
THAP1
THAP11
THAP5
THG1L
THOC1
THOC2
THOC3
THOC5
THOC7
TICRR
TIGD1
TIMELESS
TIMM10
TIMM13
TIMM22
TIMM23
TIMM29
TIMM44
TIMM8A
TIMM9
TINF2
TIPIN
TLK2
TMA16
TMED10
TMED2
TMEM183A
TMEM199
TMEM258
TNNT2
TNPO3
TOMM20
TOMM22
TOMM40
TONSL
TOP1
TOP2A
TOP3A
TOPBP1
TOR2A
TOX4
TP53RK
TPI1
TPR
TPRKB
TPT1
TPX2
TRA2B
TRAIP
TRAPPC1
TRAPPC11
TRAPPC3
TRAPPC4
TRAPPC5
TRAPPC8
TRIAP1
TRMT10C
TRMT112
TRMT5
TRNT1
TRPM7
TRRAP
TSEN2
TSEN34
TSEN54
TSFM
TSG101
TSPYL5
TSR1
TSR2
TTC1
TTC27
TTC4
TTF1
TTF2
TTI1
TTI2
TTK
TUBA1B
TUBB
TUBG1
TUBG2
TUBGCP2
TUBGCP3
TUBGCP4
TUBGCP5
TUBGCP6
TUT1
TWF1
TXN
TXNL4A
TXNL4B
U2AF2
U2SURP
UBA1
UBA2
UBA3
UBA52
UBAP1
UBE2C
UBE2D3
UBE2I
UBE2L3
UBE2M
UBE2N
UBE2S
UBE2V1
UBL5
UBQLN4
UBR4
UBTF
UFD1
UPF1
UPF2
UPF3A
UQCC3
UQCRB
UQCRC2
UQCRFS1
UQCRQ
URB1
URB2
URI1
URM1
UROD
USP10
USP18
USP36
USP37
USP39
USP5
USP7
USP8
USPL1
UTP11
UTP14A
UTP15
UTP18
UTP20
UTP23
UTP25
UTP3
UTP4
UTP6
UXT
VARS1
VARS2
VBP1
VCL
VCP
VDAC1
VHL
VIRMA
VMP1
VPS13D
VPS16
VPS18
VPS25
VPS28
VPS29
VPS33A
VPS35
VPS37A
VPS41
VPS51
VPS54
VPS72
VTI1B
WARS1
WARS2
WBP1
WBP11
WDHD1
WDR1
WDR12
WDR18
WDR24
WDR25
WDR3
WDR33
WDR36
WDR43
WDR46
WDR5
WDR55
WDR61
WDR7
WDR70
WDR74
WDR75
WDR77
WDR82
WDR83
WEE1
WNK1
WTAP
XAB2
XPO1
XPO5
XPOT
XRCC3
XRCC5
XRCC6
XRN1
XRN2
YAE1
YARS1
YARS2
YBX1
YEATS2
YEATS4
YJU2
YJU2B
YKT6
YPEL1
YPEL5
YRDC
YTHDC1
YWHAE
YWHAZ
YY1
ZBTB11
ZBTB17
ZBTB8OS
ZC3H13
ZC3H18
ZC3H8
ZCCHC9
ZCRB1
ZMAT2
ZMAT5
ZNF131
ZNF207
ZNF273
ZNF335
ZNF407
ZNF492
ZNF574
ZNF593
ZNF658
ZNF830
ZNHIT2
ZNHIT3
ZNHIT6
ZNRD2
ZPR1
ZRSR2
