# Supplementary material for: Cancer genomes tolerate deleterious coding mutations through somatic copy number amplifications of wild-type regions
Source: Nat Commun. 2023 Jun 16;14:3594. doi: 10.1038/s41467-023-39313-8 (PMC10276008; doi:10.1038/s41467-023-39313-8)
Supplement: Supplementary file 7 — Supplementary Dataset 4 [file 41467_2023_39313_MOESM7_ESM.xlsx]

## Sheet: Sheet1
tumor_type	patients*	mutations	mut_haplo	mut_nonhaplo	genes_haplo	genes_nonhaplo	genes_expressed	genes_nonexpressed	mut_damagingCADD	mut_nondamagingCADD	mut_damagingPolyPhen	mut_nondamagingPolyPhen	mut_synonymous	mut_nonsynonymous	mut_aggregating	mut_nonaggregating
BLCA	403	148100	42409	95096	3592	13097	15321	1549	51516	79489	40835	81557	33750	114350	10080	60719
BRCA	996	125962	34961	77949	3580	12896	15399	1460	39195	66811	31474	68162	23699	102263	7452	46482
CESC	273	97936	28260	58533	3540	12551	15016	1440	28632	44736	22546	46148	19479	78457	5326	33574
COADREAD	537	325800	87719	207753	3625	13590	15655	1920	105660	166545	84508	171603	65906	259894	19981	124422
ESCA	173	44384	13002	26703	3137	9925	12288	1051	12034	19946	10060	19991	7909	36475	2445	14811
GBMLGG	842	101746	26438	66014	3494	12491	14712	1445	36423	54276	28911	56168	22662	79084	6903	43306
HNSC	496	108470	29632	69784	3510	12522	14847	1398	37151	58820	30454	59440	24645	83825	7642	44165
KIRC	362	29963	8443	19158	2850	8815	11008	830	9471	16281	7856	16424	5750	24213	1751	11592
KIRP	278	31744	9081	20298	2940	9162	11281	921	10020	16498	8403	16516	6274	25470	1725	12072
LIHC	355	56331	14993	36079	3258	11151	12894	1777	17313	29134	14481	29122	11053	45278	3618	21761
LUAD	509	204532	51852	131784	3572	13063	15363	1506	72704	110118	61661	109340	42765	161767	16198	85527
LUSC	477	192514	48964	125573	3563	13091	15552	1358	66085	104485	56038	103825	41717	150797	14781	78992
MESO	77	3739	1074	2309	835	1967	2660	191	1190	1947	941	2009	822	2917	212	1383
OV	387	47273	12933	30231	3139	10264	12498	1065	15431	24237	12688	24448	9253	38020	2894	19093
PAAD	176	31287	8773	20263	2817	8963	11028	810	11246	16455	9107	16863	7179	24108	2082	13336
PCPG	159	2333	643	1490	543	1319	1729	177	820	1260	683	1287	526	1807	137	1012
PRAD	477	31184	8929	20062	2867	8820	10818	937	11117	17005	8933	17554	7528	23656	1983	13078
SARC	233	31101	8569	19145	2813	8608	10507	1174	8794	14279	7298	14276	5968	25133	1877	10751
SKCM	104	79214	18998	53179	3223	11256	13159	1553	26296	44411	21643	45002	23433	55781	6510	29065
STAD	435	217795	62522	138410	3603	13284	15726	1368	69931	122024	57303	124083	48304	169491	13245	83641
TGCT	144	3471	1046	2078	818	1794	2545	142	1067	1786	876	1798	658	2813	195	1300
THCA	479	11233	3227	7036	1697	4828	6106	529	4196	5680	3408	5845	2463	8770	786	4679
UCS	56	10341	2783	6444	1625	4444	5852	418	3723	5370	3001	5503	1942	8399	723	4437
* where both CNA and SNV were computed
